# Supplementary material for: Hydrolytic cleavage of both CS2 carbon–sulfur bonds by multinuclear Pd(II) complexes at room temperature
Source: Springer Nature journal article supplement (doi:10.1038/nchem.2637), 2016-10-24
Supplement: 41557_2017_BFnchem2637_MOESM2_ESM.cif [file 41557_2017_BFnchem2637_MOESM2_ESM.cif]

 
data_1a
 
_audit_creation_method            SHELXL-2014
_chemical_name_systematic
;
 ?
;
_chemical_name_common             ?
_chemical_melting_point           ?
_chemical_formula_moiety          ?
_chemical_formula_sum
 ' C10 H8 N4 O6 Pd' 
_chemical_formula_weight          386.60

loop_
 _atom_type_symbol
 _atom_type_description
 _atom_type_scat_dispersion_real
 _atom_type_scat_dispersion_imag
 _atom_type_scat_source
 'C'  'C'   0.0033   0.0016
 'International Tables Vol C Tables 4.2.6.8 and 6.1.1.4'
 'H'  'H'   0.0000   0.0000
 'International Tables Vol C Tables 4.2.6.8 and 6.1.1.4'
 'N'  'N'   0.0061   0.0033
 'International Tables Vol C Tables 4.2.6.8 and 6.1.1.4'
 'O'  'O'   0.0106   0.0060
 'International Tables Vol C Tables 4.2.6.8 and 6.1.1.4'
 'Pd'  'Pd'  -0.9988   1.0072
 'International Tables Vol C Tables 4.2.6.8 and 6.1.1.4'
 
_space_group_crystal_system       monoclinic
_space_group_IT_number            15
_space_group_name_H-M_alt         'C 2/c'
_space_group_name_Hall            '-C 2yc'
 
_shelx_space_group_comment
;
The symmetry employed for this shelxl refinement is uniquely defined
by the following loop, which should always be used as a source of
symmetry information in preference to the above space-group names.
They are only intended as comments.
;
 
loop_
 _space_group_symop_operation_xyz
 'x, y, z'
 '-x, y, -z+1/2'
 'x+1/2, y+1/2, z'
 '-x+1/2, y+1/2, -z+1/2'
 '-x, -y, -z'
 'x, -y, z-1/2'
 '-x+1/2, -y+1/2, -z'
 'x+1/2, -y+1/2, z-1/2'
 
_cell_length_a                    15.147(3)
_cell_length_b                    17.858(4)
_cell_length_c                    13.068(3)
_cell_angle_alpha                 90
_cell_angle_beta                  121.22(3)
_cell_angle_gamma                 90
_cell_volume                      3022.9(15)
_cell_formula_units_Z             8
_cell_measurement_temperature     273(2)
_cell_measurement_reflns_used     2926
_cell_measurement_theta_min       2.920
_cell_measurement_theta_max       26.421
 
_exptl_crystal_description        1a
_exptl_crystal_colour             yellow
_exptl_crystal_density_meas       ? 
_exptl_crystal_density_method     ?              
_exptl_crystal_density_diffrn     1.699         
_exptl_crystal_F_000              1520.0
_exptl_transmission_factor_min    ?                                             
_exptl_transmission_factor_max    ?                                             
_exptl_crystal_size_max           0.150
_exptl_crystal_size_mid           0.150
_exptl_crystal_size_min           0.100
_exptl_absorpt_coefficient_mu     1.258
_shelx_estimated_absorpt_T_min    0.472
_shelx_estimated_absorpt_T_max    0.590

_exptl_absorpt_correction_type    'none' 
_exptl_absorpt_correction_T_min   ? 
_exptl_absorpt_correction_T_max   ? 
_exptl_absorpt_process_details    ? 
 
_exptl_special_details
;
 ?
;
 
_diffrn_ambient_temperature       273(2)
_diffrn_radiation_wavelength      0.71073
_diffrn_radiation_type            MoK\a
_diffrn_source                    ?                       
_diffrn_measurement_device_type   'Bruker P4' 
_diffrn_measurement_method        '\w scans'
_diffrn_detector_area_resol_mean  ? 
_diffrn_reflns_number             27048
_diffrn_reflns_av_unetI/netI      0.0275
_diffrn_reflns_av_R_equivalents   0.0553
_diffrn_reflns_limit_h_min        -18
_diffrn_reflns_limit_h_max        18
_diffrn_reflns_limit_k_min        -20
_diffrn_reflns_limit_k_max        22
_diffrn_reflns_limit_l_min        -16
_diffrn_reflns_limit_l_max        16
_diffrn_reflns_theta_min          2.920
_diffrn_reflns_theta_max          26.421
_diffrn_reflns_theta_full         25.242
_diffrn_measured_fraction_theta_max   0.999
_diffrn_measured_fraction_theta_full  0.999
_diffrn_reflns_Laue_measured_fraction_max    0.999
_diffrn_reflns_Laue_measured_fraction_full   0.999
_diffrn_reflns_point_group_measured_fraction_max   0.999
_diffrn_reflns_point_group_measured_fraction_full  0.999
_reflns_number_total              3113 
_reflns_number_gt                 2926
_reflns_threshold_expression      'I > 2\s(I)'
_reflns_Friedel_coverage          0.000
_reflns_Friedel_fraction_max      .
_reflns_Friedel_fraction_full     .
 
_reflns_special_details
;
 Reflections were merged by SHELXL according to the crystal
 class for the calculation of statistics and refinement.
 
 _reflns_Friedel_fraction is defined as the number of unique
 Friedel pairs measured divided by the number that would be
 possible theoretically, ignoring centric projections and
 systematic absences.
;
 
_computing_data_collection        ?
_computing_cell_refinement        ?
_computing_data_reduction         ?
_computing_structure_solution     ?
_computing_structure_refinement   'SHELXL-2014 (Sheldrick, 2014)'
_computing_molecular_graphics     ?
_computing_publication_material   ?
 
_refine_special_details
;
 ?
;
_refine_ls_structure_factor_coef  Fsqd
_refine_ls_matrix_type            full
_refine_ls_weighting_scheme       calc
_refine_ls_weighting_details
'w=1/[\s^2^(Fo^2^)+(0.0672P)^2^+4.7024P] where P=(Fo^2^+2Fc^2^)/3'
_atom_sites_solution_primary      ?
_atom_sites_solution_secondary    ?
_atom_sites_solution_hydrogens    geom
_refine_ls_hydrogen_treatment     constr
_refine_ls_extinction_method      none
_refine_ls_extinction_coef        .
_refine_ls_number_reflns          3112
_refine_ls_number_parameters      190
_refine_ls_number_restraints      0
_refine_ls_R_factor_all           0.0381
_refine_ls_R_factor_gt            0.0361
_refine_ls_wR_factor_ref          0.1004
_refine_ls_wR_factor_gt           0.0975
_refine_ls_goodness_of_fit_ref    1.116
_refine_ls_restrained_S_all       1.116
_refine_ls_shift/su_max           0.001
_refine_ls_shift/su_mean          0.000
 
loop_
 _atom_site_label
 _atom_site_type_symbol
 _atom_site_fract_x
 _atom_site_fract_y
 _atom_site_fract_z
 _atom_site_U_iso_or_equiv
 _atom_site_adp_type
 _atom_site_occupancy
 _atom_site_site_symmetry_order  
 _atom_site_calc_flag
 _atom_site_refinement_flags_posn
 _atom_site_refinement_flags_adp
 _atom_site_refinement_flags_occupancy
 _atom_site_disorder_assembly
 _atom_site_disorder_group
Pd1 Pd 0.12813(2) 0.10637(2) 0.83257(2) 0.01709(12) Uani 1 1 d . . . . .
O4 O 0.14680(16) 0.07634(12) 0.69432(18) 0.0251(4) Uani 1 1 d . . . . .
O1 O 0.10851(16) -0.00343(12) 0.8515(2) 0.0258(4) Uani 1 1 d . . . . .
N2 N 0.13524(17) 0.21744(14) 0.8189(2) 0.0190(5) Uani 1 1 d . . . . .
O5 O 0.30726(19) 0.11445(14) 0.8020(2) 0.0340(6) Uani 1 1 d . . . . .
N1 N 0.09797(17) 0.13640(14) 0.9578(2) 0.0190(5) Uani 1 1 d . . . . .
N3 N 0.2409(2) 0.07933(14) 0.7152(2) 0.0246(5) Uani 1 1 d . . . . .
O6 O 0.25718(19) 0.04677(13) 0.6436(2) 0.0339(5) Uani 1 1 d . . . . .
C2 C 0.0529(3) 0.11331(18) 1.1040(3) 0.0293(7) Uani 1 1 d . . . . .
H2 H 0.0389 0.0795 1.1479 0.035 Uiso 1 1 calc R U . . .
C6 C 0.1188(2) 0.25755(16) 0.8969(3) 0.0193(5) Uani 1 1 d . . . . .
C4 C 0.0701(3) 0.23947(18) 1.0531(3) 0.0291(7) Uani 1 1 d . . . . .
H4 H 0.0675 0.2909 1.0628 0.035 Uiso 1 1 calc R U . . .
C5 C 0.0951(2) 0.21164(16) 0.9726(2) 0.0197(5) Uani 1 1 d . . . . .
O2 O 0.1758(3) -0.11307(14) 0.8885(3) 0.0476(8) Uani 1 1 d . . . . .
N4 N 0.1896(2) -0.04646(15) 0.8898(2) 0.0297(6) Uani 1 1 d . . . . .
C10 C 0.1567(2) 0.25396(18) 0.7443(3) 0.0237(6) Uani 1 1 d . . . . .
H10 H 0.1677 0.2265 0.6914 0.028 Uiso 1 1 calc R U . . .
C7 C 0.1257(2) 0.33466(17) 0.9011(3) 0.0246(6) Uani 1 1 d . . . . .
H7 H 0.1158 0.3614 0.9554 0.030 Uiso 1 1 calc R U . . .
C9 C 0.1628(2) 0.33101(18) 0.7439(3) 0.0280(6) Uani 1 1 d . . . . .
H9 H 0.1768 0.3550 0.6907 0.034 Uiso 1 1 calc R U . . .
C1 C 0.0779(2) 0.08835(18) 1.0224(3) 0.0225(6) Uani 1 1 d . . . . .
H1 H 0.0809 0.0371 1.0117 0.027 Uiso 1 1 calc R U . . .
O3 O 0.2737(2) -0.01708(17) 0.9233(3) 0.0507(7) Uani 1 1 d . . . . .
C8 C 0.1478(2) 0.37220(19) 0.8229(3) 0.0273(6) Uani 1 1 d . . . . .
H8 H 0.1524 0.4242 0.8243 0.033 Uiso 1 1 calc R U . . .
C3 C 0.0491(3) 0.1896(2) 1.1195(3) 0.0350(7) Uani 1 1 d . . . . .
H3 H 0.0324 0.2075 1.1743 0.042 Uiso 1 1 calc R U . . .
 
loop_
 _atom_site_aniso_label
 _atom_site_aniso_U_11
 _atom_site_aniso_U_22
 _atom_site_aniso_U_33
 _atom_site_aniso_U_23
 _atom_site_aniso_U_13
 _atom_site_aniso_U_12
Pd1 0.01831(16) 0.01885(17) 0.01738(16) -0.00007(6) 0.01156(12) 0.00054(6)
O4 0.0260(10) 0.0303(12) 0.0229(10) -0.0043(8) 0.0154(9) -0.0012(9)
O1 0.0270(10) 0.0212(10) 0.0302(11) 0.0010(8) 0.0154(9) 0.0014(8)
N2 0.0187(11) 0.0218(12) 0.0192(11) 0.0019(9) 0.0117(9) 0.0006(8)
O5 0.0254(12) 0.0453(14) 0.0345(13) -0.0111(10) 0.0177(11) -0.0062(9)
N1 0.0185(11) 0.0220(13) 0.0175(11) 0.0010(9) 0.0100(9) -0.0013(9)
N3 0.0304(13) 0.0242(12) 0.0263(13) -0.0010(10) 0.0197(11) 0.0011(10)
O6 0.0460(14) 0.0352(13) 0.0368(12) -0.0064(10) 0.0330(11) 0.0020(10)
C2 0.0367(18) 0.0340(17) 0.0244(16) 0.0018(12) 0.0208(15) -0.0062(12)
C6 0.0165(13) 0.0224(14) 0.0198(13) 0.0000(10) 0.0099(11) 0.0007(10)
C4 0.0403(17) 0.0273(16) 0.0305(16) -0.0063(12) 0.0259(14) -0.0056(13)
C5 0.0180(13) 0.0229(14) 0.0188(13) -0.0006(10) 0.0099(11) -0.0013(10)
O2 0.076(2) 0.0281(14) 0.0395(16) 0.0071(10) 0.0307(16) 0.0166(12)
N4 0.0418(16) 0.0290(15) 0.0239(13) 0.0055(10) 0.0209(12) 0.0132(11)
C10 0.0216(14) 0.0303(15) 0.0238(14) 0.0054(11) 0.0150(12) 0.0026(11)
C7 0.0263(15) 0.0245(15) 0.0248(14) 0.0010(11) 0.0145(12) -0.0001(11)
C9 0.0253(15) 0.0352(17) 0.0283(15) 0.0106(12) 0.0173(13) 0.0006(12)
C1 0.0249(14) 0.0252(13) 0.0208(14) 0.0012(11) 0.0143(12) -0.0038(12)
O3 0.0327(14) 0.0658(18) 0.0603(18) 0.0282(15) 0.0289(13) 0.0183(13)
C8 0.0261(15) 0.0213(14) 0.0355(17) 0.0039(12) 0.0165(14) -0.0011(12)
C3 0.053(2) 0.0376(18) 0.0305(17) -0.0053(14) 0.0329(16) -0.0053(15)
 
_geom_special_details
;
 All esds (except the esd in the dihedral angle between two l.s. planes)
 are estimated using the full covariance matrix.  The cell esds are taken
 into account individually in the estimation of esds in distances, angles
 and torsion angles; correlations between esds in cell parameters are only
 used when they are defined by crystal symmetry.  An approximate (isotropic)
 treatment of cell esds is used for estimating esds involving l.s. planes.
;
 
loop_
 _geom_bond_atom_site_label_1
 _geom_bond_atom_site_label_2
 _geom_bond_distance
 _geom_bond_site_symmetry_2
 _geom_bond_publ_flag
Pd1 N1 1.987(2) . ?
Pd1 N2 1.999(3) . ?
Pd1 O1 2.018(2) . ?
Pd1 O4 2.040(2) . ?
O4 N3 1.306(3) . ?
O1 N4 1.309(3) . ?
N2 C10 1.346(4) . ?
N2 C6 1.370(4) . ?
O5 N3 1.228(4) . ?
N1 C1 1.344(4) . ?
N1 C5 1.361(4) . ?
N3 O6 1.230(3) . ?
C2 C1 1.378(4) . ?
C2 C3 1.382(5) . ?
C2 H2 0.9300 . ?
C6 C7 1.380(4) . ?
C6 C5 1.466(4) . ?
C4 C5 1.382(4) . ?
C4 C3 1.391(4) . ?
C4 H4 0.9300 . ?
O2 N4 1.206(4) . ?
N4 O3 1.230(4) . ?
C10 C9 1.379(5) . ?
C10 H10 0.9300 . ?
C7 C8 1.400(4) . ?
C7 H7 0.9300 . ?
C9 C8 1.379(5) . ?
C9 H9 0.9300 . ?
C1 H1 0.9300 . ?
C8 H8 0.9300 . ?
C3 H3 0.9300 . ?
 
loop_
 _geom_angle_atom_site_label_1
 _geom_angle_atom_site_label_2
 _geom_angle_atom_site_label_3
 _geom_angle
 _geom_angle_site_symmetry_1
 _geom_angle_site_symmetry_3
 _geom_angle_publ_flag
N1 Pd1 N2 81.47(10) . . ?
N1 Pd1 O1 92.85(10) . . ?
N2 Pd1 O1 173.33(9) . . ?
N1 Pd1 O4 175.43(9) . . ?
N2 Pd1 O4 98.24(9) . . ?
O1 Pd1 O4 87.14(9) . . ?
N3 O4 Pd1 116.19(17) . . ?
N4 O1 Pd1 116.66(19) . . ?
C10 N2 C6 119.4(3) . . ?
C10 N2 Pd1 126.1(2) . . ?
C6 N2 Pd1 114.43(19) . . ?
C1 N1 C5 120.4(2) . . ?
C1 N1 Pd1 124.6(2) . . ?
C5 N1 Pd1 114.92(18) . . ?
O5 N3 O6 123.6(3) . . ?
O5 N3 O4 119.7(2) . . ?
O6 N3 O4 116.7(2) . . ?
C1 C2 C3 118.7(3) . . ?
C1 C2 H2 120.6 . . ?
C3 C2 H2 120.6 . . ?
N2 C6 C7 120.8(3) . . ?
N2 C6 C5 114.3(2) . . ?
C7 C6 C5 124.8(3) . . ?
C5 C4 C3 119.1(3) . . ?
C5 C4 H4 120.5 . . ?
C3 C4 H4 120.5 . . ?
N1 C5 C4 120.3(3) . . ?
N1 C5 C6 114.8(2) . . ?
C4 C5 C6 124.9(3) . . ?
O2 N4 O3 124.4(3) . . ?
O2 N4 O1 116.9(3) . . ?
O3 N4 O1 118.7(3) . . ?
N2 C10 C9 121.9(3) . . ?
N2 C10 H10 119.1 . . ?
C9 C10 H10 119.1 . . ?
C6 C7 C8 119.4(3) . . ?
C6 C7 H7 120.3 . . ?
C8 C7 H7 120.3 . . ?
C8 C9 C10 119.5(3) . . ?
C8 C9 H9 120.3 . . ?
C10 C9 H9 120.3 . . ?
N1 C1 C2 121.5(3) . . ?
N1 C1 H1 119.3 . . ?
C2 C1 H1 119.3 . . ?
C9 C8 C7 119.0(3) . . ?
C9 C8 H8 120.5 . . ?
C7 C8 H8 120.5 . . ?
C2 C3 C4 119.9(3) . . ?
C2 C3 H3 120.0 . . ?
C4 C3 H3 120.0 . . ?
 
loop_
 _geom_torsion_atom_site_label_1
 _geom_torsion_atom_site_label_2
 _geom_torsion_atom_site_label_3
 _geom_torsion_atom_site_label_4
 _geom_torsion
 _geom_torsion_site_symmetry_1
 _geom_torsion_site_symmetry_2
 _geom_torsion_site_symmetry_3
 _geom_torsion_site_symmetry_4
 _geom_torsion_publ_flag
Pd1 O4 N3 O5 -16.2(3) . . . . ?
Pd1 O4 N3 O6 164.9(2) . . . . ?
C10 N2 C6 C7 -1.2(4) . . . . ?
Pd1 N2 C6 C7 177.2(2) . . . . ?
C10 N2 C6 C5 179.4(2) . . . . ?
Pd1 N2 C6 C5 -2.2(3) . . . . ?
C1 N1 C5 C4 -0.8(4) . . . . ?
Pd1 N1 C5 C4 177.0(2) . . . . ?
C1 N1 C5 C6 179.9(2) . . . . ?
Pd1 N1 C5 C6 -2.3(3) . . . . ?
C3 C4 C5 N1 0.6(5) . . . . ?
C3 C4 C5 C6 179.9(3) . . . . ?
N2 C6 C5 N1 3.0(3) . . . . ?
C7 C6 C5 N1 -176.4(3) . . . . ?
N2 C6 C5 C4 -176.3(3) . . . . ?
C7 C6 C5 C4 4.3(5) . . . . ?
Pd1 O1 N4 O2 -171.9(2) . . . . ?
Pd1 O1 N4 O3 7.5(3) . . . . ?
C6 N2 C10 C9 0.1(4) . . . . ?
Pd1 N2 C10 C9 -178.1(2) . . . . ?
N2 C6 C7 C8 1.3(4) . . . . ?
C5 C6 C7 C8 -179.3(3) . . . . ?
N2 C10 C9 C8 0.8(5) . . . . ?
C5 N1 C1 C2 0.6(4) . . . . ?
Pd1 N1 C1 C2 -177.0(2) . . . . ?
C3 C2 C1 N1 -0.3(5) . . . . ?
C10 C9 C8 C7 -0.7(5) . . . . ?
C6 C7 C8 C9 -0.4(5) . . . . ?
C1 C2 C3 C4 0.1(5) . . . . ?
C5 C4 C3 C2 -0.2(5) . . . . ?
 
_refine_diff_density_max    1.599
_refine_diff_density_min   -1.535
_refine_diff_density_rms    0.153

# SQUEEZE RESULTS (APPEND TO CIF)
# Note: Data are Listed for all Voids in the P1 Unit Cell
# i.e. Centre of Gravity, Solvent Accessible Volume,
# Recovered number of Electrons in the Void and
# Details about the Squeezed Material
loop_
  _platon_squeeze_void_nr
  _platon_squeeze_void_average_x
  _platon_squeeze_void_average_y
  _platon_squeeze_void_average_z
  _platon_squeeze_void_volume
  _platon_squeeze_void_count_electrons
  _platon_squeeze_void_content
   1 -0.071  0.453 -0.043       663       221 ' '
_platon_squeeze_details                           ?


_shelxl_version_number 2014-3

_shelx_res_file
;
TITL jxf1 in C2/c
CELL 0.71073  15.1474  17.8581  13.0679  90.000 121.219  90.000
ZERR   36.00   0.0030   0.0036   0.0026   0.000   0.030   0.000
LATT 7
SYMM -X, Y, 0.5-Z
SFAC C  H  N  O  Pd
UNIT 36 36 36 36 36
L.S. 50
ACTA
BOND $H
FMAP 2
PLAN 5
CONF
size 0.1 0.15 0.15
FREE O2   O3
temp
WGHT    0.067200    4.702400
FVAR       0.50803
MOLE 1
PD1   5    0.128130    0.106373    0.832571    11.00000    0.01831    0.01885 =
         0.01738   -0.00007    0.01156    0.00054
O4    4    0.146800    0.076340    0.694323    11.00000    0.02602    0.03034 =
         0.02287   -0.00428    0.01537   -0.00122
O1    4    0.108507   -0.003427    0.851527    11.00000    0.02701    0.02116 =
         0.03018    0.00100    0.01545    0.00142
N2    3    0.135245    0.217443    0.818944    11.00000    0.01868    0.02182 =
         0.01922    0.00194    0.01172    0.00064
O5    4    0.307260    0.114451    0.801991    11.00000    0.02539    0.04531 =
         0.03454   -0.01113    0.01775   -0.00621
N1    3    0.097975    0.136405    0.957815    11.00000    0.01854    0.02200 =
         0.01745    0.00101    0.00998   -0.00131
N3    3    0.240915    0.079325    0.715216    11.00000    0.03037    0.02424 =
         0.02627   -0.00095    0.01972    0.00112
O6    4    0.257180    0.046774    0.643627    11.00000    0.04596    0.03522 =
         0.03680   -0.00639    0.03298    0.00195
C2    1    0.052882    0.113307    1.104044    11.00000    0.03666    0.03400 =
         0.02438    0.00181    0.02078   -0.00618
AFIX  43
H2    2    0.038855    0.079484    1.147915    11.00000   -1.20000
AFIX   0
C6    1    0.118777    0.257554    0.896881    11.00000    0.01648    0.02238 =
         0.01979    0.00001    0.00986    0.00070
C4    1    0.070149    0.239469    1.053123    11.00000    0.04028    0.02727 =
         0.03049   -0.00635    0.02588   -0.00564
AFIX  43
H4    2    0.067490    0.290851    1.062812    11.00000   -1.20000
AFIX   0
C5    1    0.095077    0.211639    0.972605    11.00000    0.01798    0.02291 =
         0.01878   -0.00060    0.00989   -0.00133
O2    4    0.175806   -0.113070    0.888456    11.00000    0.07623    0.02813 =
         0.03954    0.00714    0.03067    0.01660
N4    3    0.189594   -0.046456    0.889757    11.00000    0.04184    0.02898 =
         0.02389    0.00545    0.02093    0.01324
C10   1    0.156662    0.253960    0.744262    11.00000    0.02158    0.03032 =
         0.02384    0.00540    0.01500    0.00256
AFIX  43
H10   2    0.167663    0.226462    0.691426    11.00000   -1.20000
AFIX   0
C7    1    0.125711    0.334656    0.901106    11.00000    0.02627    0.02453 =
         0.02481    0.00103    0.01445   -0.00006
AFIX  43
H7    2    0.115785    0.361439    0.955378    11.00000   -1.20000
AFIX   0
C9    1    0.162758    0.331005    0.743864    11.00000    0.02525    0.03519 =
         0.02828    0.01064    0.01727    0.00058
AFIX  43
H9    2    0.176822    0.354986    0.690699    11.00000   -1.20000
AFIX   0
C1    1    0.077856    0.088346    1.022370    11.00000    0.02487    0.02521 =
         0.02082    0.00116    0.01429   -0.00380
AFIX  43
H1    2    0.080858    0.037124    1.011675    11.00000   -1.20000
AFIX   0
O3    4    0.273725   -0.017085    0.923283    11.00000    0.03272    0.06581 =
         0.06029    0.02824    0.02892    0.01827
C8    1    0.147837    0.372199    0.822908    11.00000    0.02607    0.02127 =
         0.03545    0.00395    0.01653   -0.00106
AFIX  43
H8    2    0.152400    0.424162    0.824271    11.00000   -1.20000
AFIX   0
C3    1    0.049075    0.189565    1.119526    11.00000    0.05286    0.03758 =
         0.03050   -0.00532    0.03289   -0.00532
AFIX  43
H3    2    0.032442    0.207502    1.174279    11.00000   -1.20000
AFIX   0
HKLF 4

REM  jxf1 in C2/c
REM R1 =  0.0361 for    2926 Fo > 4sig(Fo)  and  0.0381 for all    3112 data
REM    190 parameters refined using      0 restraints

END

WGHT      0.0671      4.7144

REM Highest difference peak  1.599,  deepest hole -1.535,  1-sigma level  0.153
Q1    1   0.0715  0.1273  0.7756  11.00000  0.05    1.60
Q2    1   0.1922  0.1219  0.8955  11.00000  0.05    1.58
Q3    1   0.0604  0.0893  0.7659  11.00000  0.05    1.52
Q4    1   0.1913  0.0907  0.8965  11.00000  0.05    1.49
Q5    1   0.0000 -0.0105  0.7500  10.50000  0.05    0.53
;
_shelx_res_checksum   41507

_shelx_hkl_file
;
  -2   2   0    5664       5                                                          34  134.15    0.00  1.0000
  -2   2   0    5763       6                                                          42  134.15    0.00  1.0000
  -2   2   0    5598       6                                                          29  134.15    0.00  1.0000
   2  -2   0    5797       6                                                          45  134.15    0.00  1.0000
   2  -2   0    5702       6                                                          37  134.15    0.00  1.0000
   2  -2   0    5478       5                                                          21  134.15    0.00  1.0000
  -3   3   0     269     156                                                        2669  -68.23    0.00  1.0000
  -3   3   0     232     156                                                        2551  -68.23    0.00  1.0000
  -3   3   0     147     157                                                        2246  -68.23    0.00  1.0000
   3  -3   0     211     156                                                        2480  -68.23    0.00  1.0000
   3  -3   0     176     157                                                        2357  -68.23    0.00  1.0000
  -4   4   0   12531    1385                                                       19987   56.89    0.00  1.0000
  -4   4   0   14932    1394                                                       22992   56.89    0.00  1.0000
  -4   4   0   15687    1390                                                       23926   56.89    0.00  1.0000
   4  -4   0   14230    1384                                                       22119   56.89    0.00  1.0000
   4  -4   0   14443    1385                                                       22384   56.89    0.00  1.0000
  -5   5   0    2505      85                                                        1156  -31.04    0.00  1.0000
  -5   5   0    2661      85                                                        1263  -31.04    0.00  1.0000
   5  -5   0    2944      84                                                        1460  -31.04    0.00  1.0000
   5  -5   0    2655      87                                                        1259  -31.04    0.00  1.0000
   5  -5   0    2606      85                                                        1225  -31.04    0.00  1.0000
  -6   6   0     276      14                                                          85   14.30    0.00  1.0000
  -6   6   0     276      14                                                          85   14.30    0.00  1.0000
   6  -6   0     262      15                                                          77   14.30    0.00  1.0000
   6  -6   0     335      13                                                         119   14.30    0.00  1.0000
   6  -6   0     265      13                                                          79   14.30    0.00  1.0000
  -7   7   0      53      12                                                          71   -2.15    0.00  1.0000
  -7   7   0      48      14                                                          65   -2.15    0.00  1.0000
   7  -7   0      54      13                                                          72   -2.15    0.00  1.0000
   7  -7   0      53      16                                                          70   -2.15    0.00  1.0000
   7  -7   0      73      13                                                          93   -2.15    0.00  1.0000
  -8   8   0    1784     135                                                        1884    2.26    0.00  1.0000
  -8   8   0    1930     134                                                        2034    2.26    0.00  1.0000
   8  -8   0    1986     138                                                        2091    2.26    0.00  1.0000
   8  -8   0    1980     130                                                        2085    2.26    0.00  1.0000
   8  -8   0    1816     134                                                        1917    2.26    0.00  1.0000
  -9   9   0    1974     128                                                        1915   -1.30    0.00  1.0000
  -9   9   0    1775     129                                                        1719   -1.30    0.00  1.0000
   9  -9   0    2100     144                                                        2039   -1.30    0.00  1.0000
   9  -9   0    1964     132                                                        1905   -1.30    0.00  1.0000
 -10  10   0      22      13                                                          30   -1.52    0.00  1.0000
 -10  10   0       3      15                                                           6   -1.52    0.00  1.0000
  10 -10   0      20      14                                                          28   -1.52    0.00  1.0000
  10 -10   0      11      17                                                          17   -1.52    0.00  1.0000
 -11  11   0    1157     100                                                        1206   -1.39    0.00  1.0000
 -11  11   0    1310      96                                                        1362   -1.39    0.00  1.0000
  11 -11   0    1322     102                                                        1375   -1.39    0.00  1.0000
  11 -11   0    1297      96                                                        1349   -1.39    0.00  1.0000
  11 -11   0    1191      96                                                        1241   -1.39    0.00  1.0000
 -12  12   0      92      31                                                         105    1.25    0.00  1.0000
 -12  12   0     144      25                                                         160    1.25    0.00  1.0000
  12 -12   0      91      28                                                         104    1.25    0.00  1.0000
  12 -12   0      54      25                                                          64    1.25    0.00  1.0000
  12 -12   0     105      24                                                         119    1.25    0.00  1.0000
 -13  13   0     604      76                                                         571   -1.30    0.00  1.0000
 -13  13   0     809      64                                                         771   -1.30    0.00  1.0000
  13 -13   0     894      79                                                         854   -1.30    0.00  1.0000
  13 -13   0     768      69                                                         731   -1.30    0.00  1.0000
  13 -13   0     684      87                                                         649   -1.30    0.00  1.0000
  12 -14   0    2771     190                                                        2865    1.72    0.00  1.0000
  12 -14   0    2349     181                                                        2436    1.72    0.00  1.0000
  12 -14   0    2625     180                                                        2717    1.72    0.00  1.0000
 -12  14   0    2707     182                                                        2800    1.72    0.00  1.0000
 -12  14   0    2541     189                                                        2631    1.72    0.00  1.0000
  11 -13   0    1389      96                                                        1310   -2.07    0.00  1.0000
  11 -13   0    1248      88                                                        1173   -2.07    0.00  1.0000
  11 -13   0    1193      89                                                        1120   -2.07    0.00  1.0000
 -11  13   0    1341      96                                                        1264   -2.07    0.00  1.0000
 -11  13   0    1247      89                                                        1172   -2.07    0.00  1.0000
  10 -12   0      19      15                                                           6    3.64    0.00  1.0000
  10 -12   0      58      16                                                          33    3.64    0.00  1.0000
  10 -12   0       4      15                                                          -7    3.64    0.00  1.0000
 -10  12   0      42      13                                                          21    3.64    0.00  1.0000
 -10  12   0      51      19                                                          28    3.64    0.00  1.0000
   9 -11   0     413      36                                                         395   -0.88    0.00  1.0000
   9 -11   0     415      36                                                         397   -0.88    0.00  1.0000
   9 -11   0     407      51                                                         389   -0.88    0.00  1.0000
  -9  11   0     321      46                                                         305   -0.88    0.00  1.0000
  -9  11   0     364      40                                                         347   -0.88    0.00  1.0000
   8 -10   0    3395     241                                                        3540    2.38    0.00  1.0000
   8 -10   0    3718     245                                                        3869    2.38    0.00  1.0000
   8 -10   0    3639     241                                                        3789    2.38    0.00  1.0000
  -8  10   0    3662     242                                                        3812    2.38    0.00  1.0000
  -8  10   0    3558     244                                                        3706    2.38    0.00  1.0000
   7  -9   0    5743     371                                                        5673   -0.89    0.00  1.0000
   7  -9   0    6026     371                                                        5955   -0.89    0.00  1.0000
   7  -9   0    6142     374                                                        6070   -0.89    0.00  1.0000
  -7   9   0    5913     372                                                        5842   -0.89    0.00  1.0000
  -7   9   0    5857     375                                                        5787   -0.89    0.00  1.0000
   6  -8   0     114      10                                                          48   -7.22    0.00  1.0000
   6  -8   0      98       8                                                          38   -7.22    0.00  1.0000
   6  -8   0      78      10                                                          26   -7.22    0.00  1.0000
  -6   8   0     120      11                                                          52   -7.22    0.00  1.0000
  -6   8   0     100      13                                                          39   -7.22    0.00  1.0000
  -6   8   0     101      11                                                          40   -7.22    0.00  1.0000
   5  -7   0     338      16                                                         150   11.85    0.00  1.0000
   5  -7   0     298      18                                                         124   11.85    0.00  1.0000
   5  -7   0     300      15                                                         125   11.85    0.00  1.0000
   5  -7   0     354      16                                                         161   11.85    0.00  1.0000
  -5   7   0     315      18                                                         135   11.85    0.00  1.0000
  -5   7   0     342      16                                                         153   11.85    0.00  1.0000
  -5   7   0     289      18                                                         118   11.85    0.00  1.0000
   4  -6   0    6561     351                                                        5477  -13.51    0.00  1.0000
   4  -6   0    7325     352                                                        6177  -13.51    0.00  1.0000
   4  -6   0    6690     353                                                        5595  -13.51    0.00  1.0000
   4  -6   0    6775     351                                                        5673  -13.51    0.00  1.0000
  -4   6   0    6647     351                                                        5556  -13.51    0.00  1.0000
  -4   6   0    6152     354                                                        5104  -13.51    0.00  1.0000
  -4   6   0    7402     352                                                        6248  -13.51    0.00  1.0000
  -4   6   0    5966     353                                                        4935  -13.51    0.00  1.0000
   3  -5   0   11662     814                                                       12774    9.73    0.00  1.0000
   3  -5   0   11910     814                                                       13034    9.73    0.00  1.0000
   3  -5   0   11803     815                                                       12922    9.73    0.00  1.0000
   3  -5   0   12858     815                                                       14025    9.73    0.00  1.0000
  -3   5   0   12997     815                                                       14170    9.73    0.00  1.0000
  -3   5   0   11341     816                                                       12438    9.73    0.00  1.0000
  -3   5   0   11350     814                                                       12448    9.73    0.00  1.0000
  -3   5   0   11769     814                                                       12886    9.73    0.00  1.0000
   2  -4   0      71       7                                                          54  -30.48    0.00  1.0000
   2  -4   0      62       7                                                          62  -30.48    0.00  1.0000
   2  -4   0      42       9                                                          86  -30.48    0.00  1.0000
   2  -4   0      59      10                                                          66  -30.48    0.00  1.0000
  -2   4   0      66       8                                                          59  -30.48    0.00  1.0000
  -2   4   0      59       8                                                          66  -30.48    0.00  1.0000
  -2   4   0      68       9                                                          57  -30.48    0.00  1.0000
  -2   4   0      67       7                                                          58  -30.48    0.00  1.0000
   1  -3   0    2927     304                                                        4664  -27.42    0.00  1.0000
   1  -3   0    2851     304                                                        4567  -27.42    0.00  1.0000
   1  -3   0    3637     306                                                        5550  -27.42    0.00  1.0000
  -1   3   0    3164     305                                                        4961  -27.42    0.00  1.0000
  -1   3   0    3220     306                                                        5032  -27.42    0.00  1.0000
  -1   3   0    2980     305                                                        4730  -27.42    0.00  1.0000
  -1   3   0    3046     306                                                        4813  -27.42    0.00  1.0000
  -2   0   0    5997     193                                                        3047   42.97    0.00  1.0000
   2   0   0    6089     192                                                        3113   42.97    0.00  1.0000
   2   0   0    5985     192                                                        3039   42.97    0.00  1.0000
  -3   1   0   10325    1276                                                       19826  -75.73    0.00  1.0000
  -3   1   0   10825    1282                                                       20516  -75.73    0.00  1.0000
   3  -1   0   10585    1278                                                       20185  -75.73    0.00  1.0000
   3  -1   0   11429    1278                                                       21344  -75.73    0.00  1.0000
  -4   2   0    2555     339                                                        5465   45.18    0.00  1.0000
  -4   2   0    2629     339                                                        5573   45.18    0.00  1.0000
   4  -2   0    2727     339                                                        5716   45.18    0.00  1.0000
   4  -2   0    2268     340                                                        5041   45.18    0.00  1.0000
   4  -2   0    2369     339                                                        5191   45.18    0.00  1.0000
  -5   3   0     966       9                                                          40  -47.87    0.00  1.0000
  -5   3   0    1031       9                                                          54  -47.87    0.00  1.0000
   5  -3   0     914       8                                                          30  -47.87    0.00  1.0000
   5  -3   0     903       7                                                          28  -47.87    0.00  1.0000
   5  -3   0     925       7                                                          32  -47.87    0.00  1.0000
  -6   4   0    2210      60                                                         838   34.90    0.00  1.0000
  -6   4   0    2094      60                                                         767   34.90    0.00  1.0000
   6  -4   0    2125      61                                                         786   34.90    0.00  1.0000
   6  -4   0    2369      61                                                         937   34.90    0.00  1.0000
   6  -4   0    2151      62                                                         802   34.90    0.00  1.0000
   6  -4   0    2440      58                                                         982   34.90    0.00  1.0000
  -7   5   0    5041     456                                                        7094  -25.56    0.00  1.0000
  -7   5   0    5117     456                                                        7184  -25.56    0.00  1.0000
   7  -5   0    5540     456                                                        7684  -25.56    0.00  1.0000
   7  -5   0    4952     456                                                        6988  -25.56    0.00  1.0000
   7  -5   0    5081     457                                                        7141  -25.56    0.00  1.0000
  -8   6   0    2188     125                                                        1653   11.83    0.00  1.0000
  -8   6   0    2403     125                                                        1841   11.83    0.00  1.0000
   8  -6   0    2519     125                                                        1942   11.83    0.00  1.0000
   8  -6   0    2405     128                                                        1842   11.83    0.00  1.0000
   8  -6   0    2663     121                                                        2069   11.83    0.00  1.0000
   8  -6   0    2311     125                                                        1760   11.83    0.00  1.0000
  -9   7   0      83      11                                                          26   -7.72    0.00  1.0000
  -9   7   0      68      13                                                          18   -7.72    0.00  1.0000
   9  -7   0      83      15                                                          26   -7.72    0.00  1.0000
   9  -7   0      93      16                                                          32   -7.72    0.00  1.0000
   9  -7   0      75       8                                                          22   -7.72    0.00  1.0000
   9  -7   0      72      12                                                          20   -7.72    0.00  1.0000
 -10   8   0      87      22                                                         133    4.22    0.00  1.0000
 -10   8   0      64      21                                                         104    4.22    0.00  1.0000
  10  -8   0      95      29                                                         142    4.22    0.00  1.0000
  10  -8   0      78      18                                                         121    4.22    0.00  1.0000
  10  -8   0      87      22                                                         132    4.22    0.00  1.0000
 -11   9   0    2660     194                                                        2576    1.58    0.00  1.0000
 -11   9   0    3140     193                                                        3049    1.58    0.00  1.0000
  11  -9   0    3093     198                                                        3003    1.58    0.00  1.0000
 -12  10   0    2940     226                                                        2985   -0.81    0.00  1.0000
 -12  10   0    3414     223                                                        3463   -0.81    0.00  1.0000
  12 -10   0    3629     226                                                        3679   -0.81    0.00  1.0000
  12 -10   0    2998     224                                                        3044   -0.81    0.00  1.0000
  12 -10   0    3512     230                                                        3562   -0.81    0.00  1.0000
 -13  11   0      88      23                                                          83    0.52    0.00  1.0000
 -13  11   0      67      30                                                          63    0.52    0.00  1.0000
  13 -11   0      76      24                                                          71    0.52    0.00  1.0000
  13 -11   0      76      33                                                          71    0.52    0.00  1.0000
  11 -15   0    1269      96                                                        1177   -2.55    0.00  1.0000
  11 -15   0    1130      85                                                        1043   -2.55    0.00  1.0000
  11 -15   0    1288      84                                                        1195   -2.55    0.00  1.0000
 -11  15   0    1258      94                                                        1166   -2.55    0.00  1.0000
 -11  15   0    1282      86                                                        1189   -2.55    0.00  1.0000
  10 -14   0     353      42                                                         419    3.24    0.00  1.0000
  10 -14   0     376      40                                                         444    3.24    0.00  1.0000
  10 -14   0     319      50                                                         382    3.24    0.00  1.0000
 -10  14   0     408      42                                                         479    3.24    0.00  1.0000
 -10  14   0     402      50                                                         472    3.24    0.00  1.0000
   9 -13   0     280      44                                                         400   -6.34    0.00  1.0000
   9 -13   0     261      36                                                         377   -6.34    0.00  1.0000
  -9  13   0     293      43                                                         416   -6.34    0.00  1.0000
  -9  13   0     297      37                                                         420   -6.34    0.00  1.0000
   8 -12   0       1       9                                                          12    5.35    0.00  1.0000
   8 -12   0      13      16                                                          40    5.35    0.00  1.0000
   8 -12   0       6      12                                                          27    5.35    0.00  1.0000
  -8  12   0       8      14                                                          31    5.35    0.00  1.0000
  -8  12   0       7      11                                                          30    5.35    0.00  1.0000
   7 -11   0    1171      60                                                         862   -9.40    0.00  1.0000
   7 -11   0    1247      66                                                         927   -9.40    0.00  1.0000
   7 -11   0    1066      61                                                         772   -9.40    0.00  1.0000
  -7  11   0    1178      64                                                         868   -9.40    0.00  1.0000
  -7  11   0    1214      62                                                         899   -9.40    0.00  1.0000
   6 -10   0       1      11                                                          67   13.99    0.00  1.0000
   6 -10   0       0      13                                                          60   13.99    0.00  1.0000
   6 -10   0       6      13                                                          95   13.99    0.00  1.0000
  -6  10   0       6      16                                                          92   13.99    0.00  1.0000
  -6  10   0       1      15                                                          65   13.99    0.00  1.0000
  -6  10   0       5      14                                                          88   13.99    0.00  1.0000
  -6  10   0       7      15                                                          96   13.99    0.00  1.0000
   5  -9   0   11490     810                                                       13296  -15.69    0.00  1.0000
   5  -9   0   11537     807                                                       13346  -15.69    0.00  1.0000
   5  -9   0   10783     807                                                       12535  -15.69    0.00  1.0000
  -5   9   0   11630     809                                                       13447  -15.69    0.00  1.0000
  -5   9   0   11113     808                                                       12890  -15.69    0.00  1.0000
  -5   9   0   11662     810                                                       13481  -15.69    0.00  1.0000
  -5   9   0    9991     813                                                       11679  -15.69    0.00  1.0000
   4  -8   0   12426     637                                                       10396   18.38    0.00  1.0000
   4  -8   0   11975     637                                                        9984   18.38    0.00  1.0000
   4  -8   0   12781     641                                                       10721   18.38    0.00  1.0000
  -4   8   0   12077     638                                                       10077   18.38    0.00  1.0000
  -4   8   0   11432     642                                                        9488   18.38    0.00  1.0000
  -4   8   0   12496     639                                                       10460   18.38    0.00  1.0000
  -4   8   0   12527     641                                                       10488   18.38    0.00  1.0000
   3  -7   0    2126      62                                                         992  -28.24    0.00  1.0000
   3  -7   0    1967      58                                                         884  -28.24    0.00  1.0000
   3  -7   0    1898      58                                                         838  -28.24    0.00  1.0000
  -3   7   0    1884      63                                                         829  -28.24    0.00  1.0000
  -3   7   0    1990      62                                                         900  -28.24    0.00  1.0000
  -3   7   0    1955      59                                                         876  -28.24    0.00  1.0000
  -3   7   0    2062      59                                                         948  -28.24    0.00  1.0000
   2  -6   0     379     116                                                        1825   44.93    0.00  1.0000
   2  -6   0     339     116                                                        1736   44.93    0.00  1.0000
   2  -6   0     494     119                                                        2068   44.93    0.00  1.0000
  -2   6   0     338     116                                                        1733   44.93    0.00  1.0000
  -2   6   0     404     116                                                        1879   44.93    0.00  1.0000
  -2   6   0     421     120                                                        1917   44.93    0.00  1.0000
  -2   6   0     347     120                                                        1755   44.93    0.00  1.0000
   1  -5   0   13078     855                                                       15458  -19.27    0.00  1.0000
  -1   5   0   11802     855                                                       14068  -19.27    0.00  1.0000
  -1   5   0    9662     856                                                       11721  -19.27    0.00  1.0000
   0   4   0   26955     938                                                       15022   80.43    0.00  1.0000
  -1  -3   0    2845     295                                                        4560  -27.42    0.00  1.0000
   1   3   0    2935     295                                                        4674  -27.42    0.00  1.0000
   1   3   0    3168     295                                                        4967  -27.42    0.00  1.0000
  -2  -2   0    5651       6                                                          33  134.15    0.00  1.0000
   2   2   0    5638       5                                                          32  134.15    0.00  1.0000
   2   2   0    5494       5                                                          22  134.15    0.00  1.0000
  -3  -1   0    9666    1220                                                       18908  -75.73    0.00  1.0000
  -3  -1   0   10187    1221                                                       19634  -75.73    0.00  1.0000
   3   1   0   10524    1226                                                       20101  -75.73    0.00  1.0000
   3   1   0   10267    1228                                                       19745  -75.73    0.00  1.0000
  -4   0   0   59496    2525                                                       40084   84.46    0.00  1.0000
  -4   0   0   60877    2532                                                       41219   84.46    0.00  1.0000
   4   0   0   59749    2528                                                       40292   84.46    0.00  1.0000
  -5   1   0   14324    1356                                                       21867  -54.48    0.00  1.0000
  -5   1   0   14921    1356                                                       22603  -54.48    0.00  1.0000
   5  -1   0   14825    1356                                                       22486  -54.48    0.00  1.0000
   5  -1   0   12998    1356                                                       20221  -54.48    0.00  1.0000
  -6   2   0     579       4                                                           4   50.32    0.00  1.0000
  -6   2   0     678       6                                                          -2   50.32    0.00  1.0000
   6  -2   0     592       7                                                           3   50.32    0.00  1.0000
   6  -2   0     557       5                                                           6   50.32    0.00  1.0000
   6  -2   0     540       6                                                           8   50.32    0.00  1.0000
  -7   3   0       1      32                                                         376  -36.55    0.00  1.0000
  -7   3   0       1      32                                                         338  -36.55    0.00  1.0000
   7  -3   0       1      34                                                         357  -36.55    0.00  1.0000
   7  -3   0       1      32                                                         348  -36.55    0.00  1.0000
   7  -3   0       2      32                                                         400  -36.55    0.00  1.0000
  -8   4   0    2848      99                                                        1405   30.76    0.00  1.0000
  -8   4   0    2911      98                                                        1449   30.76    0.00  1.0000
   8  -4   0    2877     100                                                        1425   30.76    0.00  1.0000
   8  -4   0    2891      98                                                        1435   30.76    0.00  1.0000
   8  -4   0    2804      99                                                        1374   30.76    0.00  1.0000
  -9   5   0    1290     155                                                        2109  -19.35    0.00  1.0000
  -9   5   0    1525     154                                                        2407  -19.35    0.00  1.0000
   9  -5   0    1643     149                                                        2554  -19.35    0.00  1.0000
   9  -5   0    1280     154                                                        2096  -19.35    0.00  1.0000
   9  -5   0    1408     157                                                        2259  -19.35    0.00  1.0000
   9  -5   0    1481     154                                                        2351  -19.35    0.00  1.0000
 -10   6   0     767      97                                                        1240   14.54    0.00  1.0000
 -10   6   0     784      95                                                        1262   14.54    0.00  1.0000
  10  -6   0     886      96                                                        1390   14.54    0.00  1.0000
  10  -6   0     854     100                                                        1350   14.54    0.00  1.0000
  10  -6   0     937      89                                                        1454   14.54    0.00  1.0000
  10  -6   0     761      96                                                        1233   14.54    0.00  1.0000
 -11   7   0     322      36                                                         146  -11.32    0.00  1.0000
 -11   7   0     350      29                                                         165  -11.32    0.00  1.0000
  11  -7   0     307      24                                                         136  -11.32    0.00  1.0000
  11  -7   0     325      37                                                         148  -11.32    0.00  1.0000
  11  -7   0     424      33                                                         217  -11.32    0.00  1.0000
 -12   8   0    2059     121                                                        1865    4.23    0.00  1.0000
 -12   8   0    1701     123                                                        1525    4.23    0.00  1.0000
  12  -8   0    1633     120                                                        1461    4.23    0.00  1.0000
  12  -8   0    1956     127                                                        1767    4.23    0.00  1.0000
  12  -8   0    1919     120                                                        1732    4.23    0.00  1.0000
 -13   9   0     728      64                                                         787   -2.08    0.00  1.0000
 -13   9   0     622      73                                                         677   -2.08    0.00  1.0000
  13  -9   0     688      69                                                         746   -2.08    0.00  1.0000
  13  -9   0     595      67                                                         649   -2.08    0.00  1.0000
  13  -9   0     723      78                                                         782   -2.08    0.00  1.0000
 -14  10   0     141      39                                                         154    1.04    0.00  1.0000
 -14  10   0     244      41                                                         261    1.04    0.00  1.0000
  14 -10   0     183      33                                                         198    1.04    0.00  1.0000
  14 -10   0     130      40                                                         143    1.04    0.00  1.0000
  10 -16   0      20      15                                                          31    2.06    0.00  1.0000
  10 -16   0       4      23                                                          10    2.06    0.00  1.0000
  10 -16   0       9      14                                                          16    2.06    0.00  1.0000
 -10  16   0       1      19                                                         -28    2.06    0.00  1.0000
 -10  16   0      16      15                                                          26    2.06    0.00  1.0000
   9 -15   0     245      40                                                         287   -2.52    0.00  1.0000
   9 -15   0     241      28                                                         283   -2.52    0.00  1.0000
   9 -15   0     229      29                                                         270   -2.52    0.00  1.0000
  -9  15   0     252      32                                                         295   -2.52    0.00  1.0000
  -9  15   0     236      36                                                         278   -2.52    0.00  1.0000
   8 -14   0    1709     105                                                        1467    5.89    0.00  1.0000
   8 -14   0    1657      96                                                        1419    5.89    0.00  1.0000
  -8  14   0    1710     102                                                        1468    5.89    0.00  1.0000
  -8  14   0    1751     100                                                        1506    5.89    0.00  1.0000
   7 -13   0    1740     131                                                        1926   -4.21    0.00  1.0000
   7 -13   0    1860     130                                                        2053   -4.21    0.00  1.0000
   7 -13   0    1939     138                                                        2135   -4.21    0.00  1.0000
  -7  13   0    1859     135                                                        2052   -4.21    0.00  1.0000
  -7  13   0    1582     142                                                        1760   -4.21    0.00  1.0000
  -7  13   0    1856     133                                                        2048   -4.21    0.00  1.0000
  -7  13   0    1967     139                                                        2165   -4.21    0.00  1.0000
   6 -12   0      23       7                                                           5    4.98    0.00  1.0000
   6 -12   0      56       7                                                          24    4.98    0.00  1.0000
   6 -12   0      31      11                                                           9    4.98    0.00  1.0000
  -6  12   0      65       9                                                          30    4.98    0.00  1.0000
  -6  12   0      59      13                                                          26    4.98    0.00  1.0000
  -6  12   0      51      10                                                          21    4.98    0.00  1.0000
  -6  12   0      63      16                                                          29    4.98    0.00  1.0000
   5 -11   0    1211      89                                                        1358   -3.96    0.00  1.0000
   5 -11   0    1118      83                                                        1259   -3.96    0.00  1.0000
   5 -11   0    1115      83                                                        1256   -3.96    0.00  1.0000
  -5  11   0    1142      85                                                        1284   -3.96    0.00  1.0000
  -5  11   0    1216      86                                                        1363   -3.96    0.00  1.0000
  -5  11   0    1014      92                                                        1148   -3.96    0.00  1.0000
  -5  11   0    1175      91                                                        1319   -3.96    0.00  1.0000
   4 -10   0    9309     546                                                        9282    0.27    0.00  1.0000
   4 -10   0    8788     541                                                        8762    0.27    0.00  1.0000
   4 -10   0    8505     541                                                        8479    0.27    0.00  1.0000
  -4  10   0    8649     543                                                        8623    0.27    0.00  1.0000
  -4  10   0    8055     549                                                        8030    0.27    0.00  1.0000
  -4  10   0    8982     543                                                        8955    0.27    0.00  1.0000
  -4  10   0    8748     548                                                        8722    0.27    0.00  1.0000
   3  -9   0    9611     484                                                        8632    9.91    0.00  1.0000
  -3   9   0    8744     480                                                        7811    9.91    0.00  1.0000
  -3   9   0    8424     486                                                        7509    9.91    0.00  1.0000
  -3   9   0    8293     480                                                        7385    9.91    0.00  1.0000
  -3   9   0    8082     486                                                        7186    9.91    0.00  1.0000
   2  -8   0      40       5                                                           0  -12.28    0.00  1.0000
  -2   8   0       7       4                                                          14  -12.28    0.00  1.0000
  -2   8   0       9       3                                                          11  -12.28    0.00  1.0000
  -2   8   0       8       7                                                          13  -12.28    0.00  1.0000
  -2   8   0      21       6                                                           3  -12.28    0.00  1.0000
  -1   7   0    2279     145                                                        2259    0.41    0.00  1.0000
   0   6   0   29052    2277                                                       36523  -39.93    0.00  1.0000
  -1  -5   0   12241     790                                                       14547  -19.27    0.00  1.0000
  -1  -5   0    9359     787                                                       11388  -19.27    0.00  1.0000
   1   5   0   10008     790                                                       12102  -19.27    0.00  1.0000
   1   5   0   10549     789                                                       12697  -19.27    0.00  1.0000
  -2  -4   0      52       8                                                          74  -30.48    0.00  1.0000
   2   4   0      70       8                                                          55  -30.48    0.00  1.0000
   2   4   0      65       8                                                          60  -30.48    0.00  1.0000
  -3  -3   0     231     168                                                        2547  -68.23    0.00  1.0000
  -3  -3   0     327     168                                                        2847  -68.23    0.00  1.0000
   3   3   0     260     168                                                        2642  -68.23    0.00  1.0000
   3   3   0     236     168                                                        2564  -68.23    0.00  1.0000
  -4  -2   0    2426     340                                                        5276   45.18    0.00  1.0000
  -4  -2   0    2593     339                                                        5521   45.18    0.00  1.0000
   4   2   0    2570     339                                                        5487   45.18    0.00  1.0000
   4   2   0    2444     340                                                        5303   45.18    0.00  1.0000
  -5  -1   0   14559    1391                                                       22158  -54.48    0.00  1.0000
  -5  -1   0   14749    1391                                                       22392  -54.48    0.00  1.0000
   5   1   0   14804    1391                                                       22460  -54.48    0.00  1.0000
   5   1   0   14777    1391                                                       22426  -54.48    0.00  1.0000
  -6   0   0      31      21                                                         188   37.09    0.00  1.0000
   6   0   0      43      19                                                         161   37.09    0.00  1.0000
   6   0   0      34      19                                                         181   37.09    0.00  1.0000
  -7   1   0    4190     149                                                        2119  -36.15    0.00  1.0000
  -7   1   0    4393     148                                                        2264  -36.15    0.00  1.0000
   7  -1   0    4594     149                                                        2409  -36.15    0.00  1.0000
   7  -1   0    4285     149                                                        2187  -36.15    0.00  1.0000
  -8   2   0     833     112                                                        1704   24.00    0.00  1.0000
  -8   2   0     759     113                                                        1597   24.00    0.00  1.0000
   8  -2   0     772     113                                                        1616   24.00    0.00  1.0000
   8  -2   0     811     112                                                        1673   24.00    0.00  1.0000
   8  -2   0     746     112                                                        1578   24.00    0.00  1.0000
  -9   3   0     561      84                                                        1175  -20.48    0.00  1.0000
  -9   3   0     526      85                                                        1124  -20.48    0.00  1.0000
   9  -3   0     575      87                                                        1196  -20.48    0.00  1.0000
   9  -3   0     602      84                                                        1234  -20.48    0.00  1.0000
   9  -3   0     503      85                                                        1091  -20.48    0.00  1.0000
 -10   4   0     294      52                                                         557   12.50    0.00  1.0000
 -10   4   0     343      50                                                         625   12.50    0.00  1.0000
  10  -4   0     242      50                                                         485   12.50    0.00  1.0000
  10  -4   0     318      50                                                         591   12.50    0.00  1.0000
  10  -4   0     343      55                                                         624   12.50    0.00  1.0000
 -11   5   0    4561     283                                                        3990   -8.44    0.00  1.0000
 -11   5   0    4751     280                                                        4168   -8.44    0.00  1.0000
  11  -5   0    4927     285                                                        4333   -8.44    0.00  1.0000
  11  -5   0    5323     273                                                        4705   -8.44    0.00  1.0000
  11  -5   0    4499     282                                                        3932   -8.44    0.00  1.0000
  11  -5   0    5250     282                                                        4636   -8.44    0.00  1.0000
 -12   6   0     836      93                                                        1082    7.70    0.00  1.0000
 -12   6   0     964      89                                                        1227    7.70    0.00  1.0000
  12  -6   0     982      91                                                        1247    7.70    0.00  1.0000
  12  -6   0     963      97                                                        1226    7.70    0.00  1.0000
  12  -6   0     795      90                                                        1035    7.70    0.00  1.0000
 -13   7   0     180      40                                                         226   -3.13    0.00  1.0000
 -13   7   0     289      40                                                         347   -3.13    0.00  1.0000
  13  -7   0     213      39                                                         263   -3.13    0.00  1.0000
  13  -7   0     339      55                                                         401   -3.13    0.00  1.0000
  13  -7   0     202      37                                                         251   -3.13    0.00  1.0000
 -14   8   0     117      27                                                         131    1.25    0.00  1.0000
 -14   8   0      54      29                                                          64    1.25    0.00  1.0000
  14  -8   0      39      27                                                          47    1.25    0.00  1.0000
  14  -8   0      87      37                                                          99    1.25    0.00  1.0000
  14  -8   0      43      29                                                          52    1.25    0.00  1.0000
   9 -17   0       9      22                                                           8   -0.47    0.00  1.0000
  -9  17   0      13      15                                                          11   -0.47    0.00  1.0000
  -9  17   0      22      12                                                          20   -0.47    0.00  1.0000
   8 -16   0     444      47                                                         438    0.29    0.00  1.0000
  -8  16   0     422      38                                                         416    0.29    0.00  1.0000
  -8  16   0     424      36                                                         418    0.29    0.00  1.0000
   7 -15   0     950      79                                                        1103   -4.64    0.00  1.0000
  -7  15   0     969      74                                                        1124   -4.64    0.00  1.0000
  -7  15   0     793      75                                                         934   -4.64    0.00  1.0000
  -7  15   0     932      82                                                        1084   -4.64    0.00  1.0000
  -7  15   0     853      86                                                         999   -4.64    0.00  1.0000
   6 -14   0     599      40                                                         454    6.12    0.00  1.0000
  -6  14   0     589      33                                                         445    6.12    0.00  1.0000
  -6  14   0     583      34                                                         440    6.12    0.00  1.0000
  -6  14   0     461      44                                                         335    6.12    0.00  1.0000
  -6  14   0     571      44                                                         430    6.12    0.00  1.0000
   5 -13   0     617      32                                                         346  -12.09    0.00  1.0000
  -5  13   0     577      26                                                         316  -12.09    0.00  1.0000
  -5  13   0     609      26                                                         340  -12.09    0.00  1.0000
  -5  13   0     505      38                                                         263  -12.09    0.00  1.0000
  -5  13   0     603      36                                                         335  -12.09    0.00  1.0000
   4 -12   0      38       9                                                           9   17.53    0.00  1.0000
  -4  12   0      18       7                                                          25   17.53    0.00  1.0000
  -4  12   0      26      12                                                          17   17.53    0.00  1.0000
  -4  12   0      38      12                                                           9   17.53    0.00  1.0000
  -4  12   0      14       6                                                          31   17.53    0.00  1.0000
   3 -11   0    1056     124                                                        2121  -26.20    0.00  1.0000
  -3  11   0     838     119                                                        1807  -26.20    0.00  1.0000
  -3  11   0     817     127                                                        1775  -26.20    0.00  1.0000
  -3  11   0     857     128                                                        1835  -26.20    0.00  1.0000
   2 -10   0     272      52                                                         833   23.90    0.00  1.0000
  -2  10   0     188      54                                                         681   23.90    0.00  1.0000
  -2  10   0     171      55                                                         647   23.90    0.00  1.0000
  -1   9   0   16034     868                                                       12809  -25.99    0.00  1.0000
  -1   9   0   18382     866                                                       14916  -25.99    0.00  1.0000
   0   8   0   21125    1776                                                       28482   45.26    0.00  1.0000
  -1  -7   0    1791     129                                                        1773    0.41    0.00  1.0000
  -1  -7   0    2337     129                                                        2317    0.41    0.00  1.0000
   1   7   0    1971     130                                                        1952    0.41    0.00  1.0000
   1   7   0    2203     129                                                        2183    0.41    0.00  1.0000
  -2  -6   0     506     117                                                        2094   44.93    0.00  1.0000
  -2  -6   0     320     117                                                        1694   44.93    0.00  1.0000
   2   6   0     334     119                                                        1724   44.93    0.00  1.0000
   2   6   0     387     117                                                        1842   44.93    0.00  1.0000
  -3  -5   0   11669     804                                                       12782    9.73    0.00  1.0000
   3   5   0   11708     803                                                       12823    9.73    0.00  1.0000
   3   5   0   11969     803                                                       13096    9.73    0.00  1.0000
  -4  -4   0   16537    1456                                                       24974   56.89    0.00  1.0000
  -4  -4   0   14758    1457                                                       22776   56.89    0.00  1.0000
   4   4   0   15274    1456                                                       23416   56.89    0.00  1.0000
   4   4   0   14579    1457                                                       22554   56.89    0.00  1.0000
  -5  -3   0     925       8                                                          32  -47.87    0.00  1.0000
  -5  -3   0     956       9                                                          38  -47.87    0.00  1.0000
   5   3   0     976       9                                                          42  -47.87    0.00  1.0000
   5   3   0     898       7                                                          27  -47.87    0.00  1.0000
  -6  -2   0     540       6                                                           8   50.32    0.00  1.0000
  -6  -2   0     505       8                                                          13   50.32    0.00  1.0000
   6   2   0     579       6                                                           4   50.32    0.00  1.0000
   6   2   0     482       7                                                          17   50.32    0.00  1.0000
  -7  -1   0    4410     144                                                        2276  -36.15    0.00  1.0000
  -7  -1   0    4253     145                                                        2164  -36.15    0.00  1.0000
   7   1   0    4090     144                                                        2048  -36.15    0.00  1.0000
   7   1   0    4318     144                                                        2210  -36.15    0.00  1.0000
  -8   0   0   12809    1099                                                       17454   36.60    0.00  1.0000
  -8   0   0   12846    1101                                                       17498   36.60    0.00  1.0000
   8   0   0   13140    1100                                                       17841   36.60    0.00  1.0000
  -9   1   0    1079      38                                                         385  -25.59    0.00  1.0000
  -9   1   0    1110      37                                                         404  -25.59    0.00  1.0000
   9  -1   0    1060      39                                                         374  -25.59    0.00  1.0000
   9  -1   0    1080      36                                                         386  -25.59    0.00  1.0000
 -10   2   0       0      24                                                         131   21.68    0.00  1.0000
 -10   2   0       1      24                                                         150   21.68    0.00  1.0000
  10  -2   0       1      26                                                         154   21.68    0.00  1.0000
  10  -2   0       4      25                                                         172   21.68    0.00  1.0000
  10  -2   0       0      21                                                         113   21.68    0.00  1.0000
 -11   3   0    1220      59                                                         736  -15.09    0.00  1.0000
 -11   3   0    1147      62                                                         679  -15.09    0.00  1.0000
  11  -3   0    1094      66                                                         639  -15.09    0.00  1.0000
  11  -3   0    1241      61                                                         752  -15.09    0.00  1.0000
  11  -3   0    1219      65                                                         735  -15.09    0.00  1.0000
 -12   4   0    2831     212                                                        3367    9.33    0.00  1.0000
 -12   4   0    2508     214                                                        3014    9.33    0.00  1.0000
  12  -4   0    2393     212                                                        2888    9.33    0.00  1.0000
  12  -4   0    2880     212                                                        3421    9.33    0.00  1.0000
  12  -4   0    2516     222                                                        3023    9.33    0.00  1.0000
 -13   5   0     151      25                                                          71   -7.59    0.00  1.0000
 -13   5   0     147      19                                                          68   -7.59    0.00  1.0000
  13  -5   0     144      15                                                          66   -7.59    0.00  1.0000
  13  -5   0     101      22                                                          38   -7.59    0.00  1.0000
  13  -5   0     168      31                                                          83   -7.59    0.00  1.0000
  13  -5   0     153      24                                                          72   -7.59    0.00  1.0000
 -14   6   0     213      36                                                         164    3.47    0.00  1.0000
 -14   6   0     257      34                                                         203    3.47    0.00  1.0000
  14  -6   0     278      38                                                         221    3.47    0.00  1.0000
  14  -6   0     205      34                                                         157    3.47    0.00  1.0000
  14  -6   0     330      47                                                         268    3.47    0.00  1.0000
 -15   7   0     138      30                                                         150   -0.94    0.00  1.0000
 -15   7   0     124      41                                                         135   -0.94    0.00  1.0000
  15  -7   0     133      41                                                         145   -0.94    0.00  1.0000
  15  -7   0      73      37                                                          82   -0.94    0.00  1.0000
  15  -7   0     177      50                                                         190   -0.94    0.00  1.0000
   8 -18   0    1801     123                                                        1825    0.55    0.00  1.0000
  -8  18   0    1656     111                                                        1679    0.55    0.00  1.0000
  -8  18   0    1567     109                                                        1590    0.55    0.00  1.0000
   7 -17   0     224      36                                                         244    1.28    0.00  1.0000
  -7  17   0     175      20                                                         193    1.28    0.00  1.0000
  -7  17   0     179      33                                                         197    1.28    0.00  1.0000
  -7  17   0     213      36                                                         233    1.28    0.00  1.0000
  -7  17   0     200      22                                                         219    1.28    0.00  1.0000
   6 -16   0      36      15                                                          37    0.17    0.00  1.0000
  -6  16   0      23      19                                                          24    0.17    0.00  1.0000
  -6  16   0      17      18                                                          18    0.17    0.00  1.0000
   5 -15   0     527      46                                                         585    2.37    0.00  1.0000
  -5  15   0     475      51                                                         530    2.37    0.00  1.0000
  -5  15   0     375      51                                                         424    2.37    0.00  1.0000
   4 -14   0    4254     236                                                        4175   -1.18    0.00  1.0000
  -4  14   0    3339     240                                                        3269   -1.18    0.00  1.0000
  -4  14   0    3555     240                                                        3483   -1.18    0.00  1.0000
  -3  13   0    1500     115                                                        1624    3.04    0.00  1.0000
  -3  13   0    1569     118                                                        1696    3.04    0.00  1.0000
  -2  12   0      60      18                                                          95    3.82    0.00  1.0000
  -2  12   0      83      20                                                         123    3.82    0.00  1.0000
  -1  11   0    1532     113                                                        1549    0.43    0.00  1.0000
  -1  11   0    1673     109                                                        1691    0.43    0.00  1.0000
   0  10   0   15693     908                                                       15639   -0.42    0.00  1.0000
   0  10   0   13520     913                                                       13470   -0.42    0.00  1.0000
   1   9   0   19708     958                                                       16113  -25.99    0.00  1.0000
   1   9   0   17346     956                                                       13984  -25.99    0.00  1.0000
   1   9   0   19694     957                                                       16100  -25.99    0.00  1.0000
  -2  -8   0      10       3                                                          10  -12.28    0.00  1.0000
  -2  -8   0      19       4                                                           4  -12.28    0.00  1.0000
   2   8   0      14       4                                                           7  -12.28    0.00  1.0000
   2   8   0      14       4                                                           7  -12.28    0.00  1.0000
  -3  -7   0    2060      59                                                         947  -28.24    0.00  1.0000
  -3  -7   0    1922      60                                                         854  -28.24    0.00  1.0000
   3   7   0    2007      60                                                         911  -28.24    0.00  1.0000
   3   7   0    1913      60                                                         848  -28.24    0.00  1.0000
  -4  -6   0    6335     345                                                        5271  -13.51    0.00  1.0000
  -4  -6   0    6715     347                                                        5618  -13.51    0.00  1.0000
   4   6   0    6463     346                                                        5388  -13.51    0.00  1.0000
   4   6   0    6793     346                                                        5689  -13.51    0.00  1.0000
  -5  -5   0    2667      83                                                        1267  -31.04    0.00  1.0000
  -5  -5   0    2591      84                                                        1215  -31.04    0.00  1.0000
   5   5   0    2549      84                                                        1186  -31.04    0.00  1.0000
   5   5   0    2644      83                                                        1251  -31.04    0.00  1.0000
  -6  -4   0    2254      60                                                         865   34.90    0.00  1.0000
  -6  -4   0    2184      61                                                         822   34.90    0.00  1.0000
   6   4   0    2174      61                                                         816   34.90    0.00  1.0000
   6   4   0    2197      59                                                         830   34.90    0.00  1.0000
  -7  -3   0       1      34                                                         360  -36.55    0.00  1.0000
  -7  -3   0       1      32                                                         369  -36.55    0.00  1.0000
   7   3   0       1      32                                                         364  -36.55    0.00  1.0000
   7   3   0       1      33                                                         351  -36.55    0.00  1.0000
  -8  -2   0     899     115                                                        1798   24.00    0.00  1.0000
  -8  -2   0     728     116                                                        1553   24.00    0.00  1.0000
   8   2   0     836     117                                                        1709   24.00    0.00  1.0000
   8   2   0     822     115                                                        1689   24.00    0.00  1.0000
  -9  -1   0    1037      38                                                         360  -25.59    0.00  1.0000
  -9  -1   0    1049      35                                                         367  -25.59    0.00  1.0000
   9   1   0    1132      37                                                         417  -25.59    0.00  1.0000
 -10   0   0    1147      49                                                         613   17.59    0.00  1.0000
 -10   0   0    1061      52                                                         551   17.59    0.00  1.0000
  10   0   0    1045      51                                                         539   17.59    0.00  1.0000
  10   0   0    1111      49                                                         587   17.59    0.00  1.0000
  10   0   0    1067      52                                                         555   17.59    0.00  1.0000
 -11   1   0    1319     134                                                        1936  -14.87    0.00  1.0000
 -11   1   0    1284     137                                                        1894  -14.87    0.00  1.0000
  11  -1   0    1230     136                                                        1829  -14.87    0.00  1.0000
  11  -1   0    1362     137                                                        1989  -14.87    0.00  1.0000
  11  -1   0    1350     134                                                        1974  -14.87    0.00  1.0000
 -12   2   0     202      18                                                          63   12.21    0.00  1.0000
 -12   2   0     108      18                                                          17   12.21    0.00  1.0000
  12  -2   0     120      18                                                          22   12.21    0.00  1.0000
  12  -2   0      40      16                                                          -7   12.21    0.00  1.0000
  12  -2   0     123      22                                                          23   12.21    0.00  1.0000
 -13   3   0       3      21                                                           7   -8.13    0.00  1.0000
 -13   3   0       2      18                                                          24   -8.13    0.00  1.0000
  13  -3   0       2      25                                                          24   -8.13    0.00  1.0000
  13  -3   0      11      21                                                           1   -8.13    0.00  1.0000
  13  -3   0      18      19                                                          -1   -8.13    0.00  1.0000
 -14   4   0     179      23                                                          95    7.01    0.00  1.0000
 -14   4   0     164      30                                                          84    7.01    0.00  1.0000
  14  -4   0     183      32                                                          98    7.01    0.00  1.0000
  14  -4   0     137      29                                                          65    7.01    0.00  1.0000
  14  -4   0     164      18                                                          84    7.01    0.00  1.0000
  14  -4   0      64      25                                                          19    7.01    0.00  1.0000
 -15   5   0    1586     129                                                        1765   -4.23    0.00  1.0000
 -15   5   0    1369     138                                                        1536   -4.23    0.00  1.0000
  15  -5   0    1694     145                                                        1879   -4.23    0.00  1.0000
  15  -5   0    1360     134                                                        1526   -4.23    0.00  1.0000
  15  -5   0    1630     132                                                        1811   -4.23    0.00  1.0000
  -7  19   0    2036     155                                                        1963   -1.58    0.00  1.0000
  -6  18   0     304      52                                                         320    0.90    0.00  1.0000
  -6  18   0     241      42                                                         256    0.90    0.00  1.0000
  -5  17   0     154      34                                                         207   -3.79    0.00  1.0000
  -5  17   0     115      30                                                         161   -3.79    0.00  1.0000
  -4  16   0     138      31                                                         175    2.87    0.00  1.0000
  -4  16   0     179      32                                                         221    2.87    0.00  1.0000
  -3  15   0    1169      75                                                         956   -6.33    0.00  1.0000
  -3  15   0    1036      70                                                         836   -6.33    0.00  1.0000
  -2  14   0     165      27                                                         206    2.92    0.00  1.0000
  -2  14   0     142      31                                                         180    2.92    0.00  1.0000
  -1  13   0    1786     149                                                        2266  -10.33    0.00  1.0000
  -1  13   0    1759     156                                                        2236  -10.33    0.00  1.0000
   0  12   0     192      16                                                         124    5.26    0.00  1.0000
   0  12   0     178      22                                                         113    5.26    0.00  1.0000
   1  11   0    1505     104                                                        1522    0.43    0.00  1.0000
   1  11   0    1719     107                                                        1737    0.43    0.00  1.0000
  -2 -10   0     231      45                                                         760   23.90    0.00  1.0000
  -2 -10   0     150      47                                                         606   23.90    0.00  1.0000
   2  10   0     183      48                                                         671   23.90    0.00  1.0000
   2  10   0     222      46                                                         744   23.90    0.00  1.0000
  -3  -9   0    7785     483                                                        6906    9.91    0.00  1.0000
  -3  -9   0    9566     482                                                        8589    9.91    0.00  1.0000
   3   9   0    8262     483                                                        7356    9.91    0.00  1.0000
   3   9   0    8955     482                                                        8011    9.91    0.00  1.0000
  -4  -8   0   11619     623                                                        9659   18.38    0.00  1.0000
   4   8   0   11930     624                                                        9943   18.38    0.00  1.0000
   4   8   0   12293     622                                                       10274   18.38    0.00  1.0000
  -5  -7   0     344      18                                                         154   11.85    0.00  1.0000
  -5  -7   0     330      17                                                         145   11.85    0.00  1.0000
   5   7   0     303      17                                                         127   11.85    0.00  1.0000
   5   7   0     317      16                                                         136   11.85    0.00  1.0000
  -6  -6   0     271      13                                                          82   14.30    0.00  1.0000
  -6  -6   0     250      13                                                          71   14.30    0.00  1.0000
   6   6   0     233      11                                                          62   14.30    0.00  1.0000
   6   6   0     223      12                                                          57   14.30    0.00  1.0000
  -7  -5   0    5133     443                                                        7203  -25.56    0.00  1.0000
  -7  -5   0    4915     445                                                        6944  -25.56    0.00  1.0000
   7   5   0    4970     443                                                        7009  -25.56    0.00  1.0000
   7   5   0    4870     445                                                        6890  -25.56    0.00  1.0000
  -8  -4   0    3067     101                                                        1560   30.76    0.00  1.0000
  -8  -4   0    2830     102                                                        1392   30.76    0.00  1.0000
   8   4   0    2824     102                                                        1388   30.76    0.00  1.0000
   8   4   0    2928     100                                                        1461   30.76    0.00  1.0000
  -9  -3   0     537      87                                                        1141  -20.48    0.00  1.0000
  -9  -3   0     589      84                                                        1216  -20.48    0.00  1.0000
   9   3   0     550      86                                                        1160  -20.48    0.00  1.0000
   9   3   0     536      84                                                        1139  -20.48    0.00  1.0000
 -10  -2   0       3      26                                                         169   21.68    0.00  1.0000
 -10  -2   0       3      27                                                         165   21.68    0.00  1.0000
  10   2   0       2      25                                                         160   21.68    0.00  1.0000
  10   2   0       1      26                                                         152   21.68    0.00  1.0000
 -11  -1   0    1426     140                                                        2066  -14.87    0.00  1.0000
 -11  -1   0    1352     143                                                        1977  -14.87    0.00  1.0000
  11   1   0    1391     140                                                        2024  -14.87    0.00  1.0000
 -12   0   0    3475     209                                                        2872   10.36    0.00  1.0000
 -12   0   0    3783     205                                                        3153   10.36    0.00  1.0000
  12   0   0    3850     206                                                        3214   10.36    0.00  1.0000
  12   0   0    3569     208                                                        2958   10.36    0.00  1.0000
 -13   1   0     818      96                                                        1085   -8.39    0.00  1.0000
 -13   1   0     937      92                                                        1222   -8.39    0.00  1.0000
  13  -1   0     891      99                                                        1169   -8.39    0.00  1.0000
  13  -1   0     961      94                                                        1249   -8.39    0.00  1.0000
 -14   2   0       7      18                                                         -11    4.93    0.00  1.0000
 -14   2   0       7      23                                                         -50    4.93    0.00  1.0000
  14  -2   0       7      21                                                         -22    4.93    0.00  1.0000
  14  -2   0       7      23                                                         -14    4.93    0.00  1.0000
  14  -2   0      10      28                                                          32    4.93    0.00  1.0000
 -15   3   0     178      44                                                         236   -3.90    0.00  1.0000
 -15   3   0     222      46                                                         286   -3.90    0.00  1.0000
  15  -3   0     161      46                                                         216   -3.90    0.00  1.0000
  15  -3   0     152      44                                                         206   -3.90    0.00  1.0000
  15  -3   0     140      37                                                         192   -3.90    0.00  1.0000
  -6  20   0      27      32                                                          21    1.14    0.00  1.0000
  -6  20   0       0      30                                                          -4    1.14    0.00  1.0000
  -5  19   0    1157     102                                                        1159   -0.06    0.00  1.0000
  -5  19   0    1286     103                                                        1288   -0.06    0.00  1.0000
  -4  18   0    2849     198                                                        2721    2.34    0.00  1.0000
  -4  18   0    3222     203                                                        3086    2.34    0.00  1.0000
  -3  17   0      46      20                                                          53   -0.96    0.00  1.0000
  -3  17   0      59      24                                                          67   -0.96    0.00  1.0000
  -2  16   0      10      17                                                         -16    6.11    0.00  1.0000
  -2  16   0       5      15                                                          29    6.11    0.00  1.0000
  -1  15   0     872      70                                                         953   -2.60    0.00  1.0000
  -1  15   0     820      77                                                         899   -2.60    0.00  1.0000
   0  14   0    7729     448                                                        6692   11.81    0.00  1.0000
   0  14   0    8273     440                                                        7199   11.81    0.00  1.0000
   1  13   0    1962     155                                                        2464  -10.33    0.00  1.0000
   1  13   0    1798     165                                                        2279  -10.33    0.00  1.0000
  -2 -12   0     100      10                                                         143    3.82    0.00  1.0000
   2  12   0      76      15                                                         114    3.82    0.00  1.0000
   2  12   0      82      14                                                         122    3.82    0.00  1.0000
   2  12   0      82      12                                                         122    3.82    0.00  1.0000
  -3 -11   0     769     123                                                        1704  -26.20    0.00  1.0000
  -3 -11   0    1041     121                                                        2099  -26.20    0.00  1.0000
   3  11   0     992     122                                                        2030  -26.20    0.00  1.0000
   3  11   0     791     123                                                        1737  -26.20    0.00  1.0000
  -4 -10   0    9594     553                                                        9566    0.27    0.00  1.0000
  -4 -10   0    8135     555                                                        8110    0.27    0.00  1.0000
   4  10   0    8573     555                                                        8547    0.27    0.00  1.0000
   4  10   0    9209     554                                                        9182    0.27    0.00  1.0000
  -5  -9   0   10408     771                                                       12130  -15.69    0.00  1.0000
   5   9   0   11100     770                                                       12876  -15.69    0.00  1.0000
   5   9   0   10234     771                                                       11942  -15.69    0.00  1.0000
  -6  -8   0     107      10                                                          44   -7.22    0.00  1.0000
  -6  -8   0     120      13                                                          52   -7.22    0.00  1.0000
   6   8   0     109       9                                                          45   -7.22    0.00  1.0000
   6   8   0      93      10                                                          35   -7.22    0.00  1.0000
  -7  -7   0      41      13                                                          56   -2.15    0.00  1.0000
  -7  -7   0      84      16                                                         106   -2.15    0.00  1.0000
   7   7   0      52      15                                                          69   -2.15    0.00  1.0000
   7   7   0      65      15                                                          84   -2.15    0.00  1.0000
  -8  -6   0    2336     122                                                        1782   11.83    0.00  1.0000
  -8  -6   0    2335     119                                                        1781   11.83    0.00  1.0000
   8   6   0    2242     122                                                        1700   11.83    0.00  1.0000
   8   6   0    2330     120                                                        1777   11.83    0.00  1.0000
  -9  -5   0    1478     152                                                        2347  -19.35    0.00  1.0000
  -9  -5   0    1380     155                                                        2223  -19.35    0.00  1.0000
   9   5   0    1373     152                                                        2214  -19.35    0.00  1.0000
   9   5   0    1414     155                                                        2266  -19.35    0.00  1.0000
 -10  -4   0     291      53                                                         554   12.50    0.00  1.0000
 -10  -4   0     327      50                                                         603   12.50    0.00  1.0000
  10   4   0     288      49                                                         549   12.50    0.00  1.0000
  10   4   0     324      53                                                         599   12.50    0.00  1.0000
 -11  -3   0    1237      61                                                         749  -15.09    0.00  1.0000
 -11  -3   0    1236      66                                                         748  -15.09    0.00  1.0000
  11   3   0    1268      62                                                         773  -15.09    0.00  1.0000
  11   3   0    1134      64                                                         669  -15.09    0.00  1.0000
 -12  -2   0     136      22                                                          29   12.21    0.00  1.0000
 -12  -2   0     116      15                                                          20   12.21    0.00  1.0000
  12   2   0      40      16                                                         -24   12.21    0.00  1.0000
  12   2   0     127      16                                                          25   12.21    0.00  1.0000
 -13  -1   0     841      93                                                        1111   -8.39    0.00  1.0000
 -13  -1   0     888      87                                                        1166   -8.39    0.00  1.0000
  13   1   0     637     104                                                         875   -8.39    0.00  1.0000
  13   1   0     747      92                                                        1003   -8.39    0.00  1.0000
  13   1   0     931      89                                                        1215   -8.39    0.00  1.0000
 -14   0   0     182      47                                                         298    7.31    0.00  1.0000
 -14   0   0     237      57                                                         368    7.31    0.00  1.0000
  14   0   0     169      45                                                         282    7.31    0.00  1.0000
  14   0   0     138      38                                                         241    7.31    0.00  1.0000
 -15   1   0    1140      82                                                         987   -4.55    0.00  1.0000
 -15   1   0     950      95                                                         811   -4.55    0.00  1.0000
  15  -1   0    1023      84                                                         878   -4.55    0.00  1.0000
  15  -1   0    1213      95                                                        1055   -4.55    0.00  1.0000
  15  -1   0     926      88                                                         788   -4.55    0.00  1.0000
 -16   2   0     138      35                                                         179    3.17    0.00  1.0000
 -16   2   0     142      49                                                         184    3.17    0.00  1.0000
  16  -2   0     116      42                                                         154    3.17    0.00  1.0000
  16  -2   0      98      46                                                         133    3.17    0.00  1.0000
  16  -2   0     212      55                                                         262    3.17    0.00  1.0000
  -5  21   0      72      32                                                          79   -0.77    0.00  1.0000
  -5  21   0      80      38                                                          87   -0.77    0.00  1.0000
  -4  20   0    1143      98                                                        1154   -0.32    0.00  1.0000
  -4  20   0     906      88                                                         916   -0.32    0.00  1.0000
  -3  19   0    1964     157                                                        2015   -1.11    0.00  1.0000
  -3  19   0    2441     167                                                        2498   -1.11    0.00  1.0000
  -2  18   0      87      28                                                         112   -2.38    0.00  1.0000
  -2  18   0      53      20                                                          72   -2.38    0.00  1.0000
  -1  17   0     155      23                                                         135   -1.58    0.00  1.0000
  -1  17   0     166      30                                                         146   -1.58    0.00  1.0000
   0  16   0      37      14                                                          68   -4.28    0.00  1.0000
   0  16   0      32      24                                                          62   -4.28    0.00  1.0000
   1  15   0     870      83                                                         951   -2.60    0.00  1.0000
   1  15   0     881      68                                                         962   -2.60    0.00  1.0000
   2  14   0     144      21                                                         182    2.92    0.00  1.0000
   2  14   0     137      32                                                         175    2.92    0.00  1.0000
   2  14   0     169      20                                                         211    2.92    0.00  1.0000
  -3 -13   0    1685     115                                                        1816    3.04    0.00  1.0000
  -3 -13   0    1537     118                                                        1663    3.04    0.00  1.0000
   3  13   0    1785     118                                                        1920    3.04    0.00  1.0000
   3  13   0    1551     119                                                        1677    3.04    0.00  1.0000
   3  13   0    1866     117                                                        2004    3.04    0.00  1.0000
  -4 -12   0      26       9                                                          17   17.53    0.00  1.0000
  -4 -12   0      24       6                                                          19   17.53    0.00  1.0000
   4  12   0      19       8                                                          24   17.53    0.00  1.0000
   4  12   0      23      10                                                          20   17.53    0.00  1.0000
  -5 -11   0    1064      89                                                        1202   -3.96    0.00  1.0000
  -5 -11   0    1224      87                                                        1371   -3.96    0.00  1.0000
   5  11   0    1195      88                                                        1341   -3.96    0.00  1.0000
  -6 -10   0       3      15                                                          79   13.99    0.00  1.0000
   6  10   0       1      14                                                          66   13.99    0.00  1.0000
   6  10   0       4      14                                                          86   13.99    0.00  1.0000
  -7  -9   0    6563     369                                                        6489   -0.89    0.00  1.0000
  -7  -9   0    5417     370                                                        5349   -0.89    0.00  1.0000
   7   9   0    5948     369                                                        5877   -0.89    0.00  1.0000
   7   9   0    5558     371                                                        5490   -0.89    0.00  1.0000
  -8  -8   0    1686     129                                                        1783    2.26    0.00  1.0000
  -8  -8   0    1876     127                                                        1978    2.26    0.00  1.0000
   8   8   0    1686     130                                                        1783    2.26    0.00  1.0000
   8   8   0    1884     128                                                        1987    2.26    0.00  1.0000
  -9  -7   0      58      12                                                          13   -7.72    0.00  1.0000
  -9  -7   0      79      12                                                          24   -7.72    0.00  1.0000
   9   7   0     100      13                                                          36   -7.72    0.00  1.0000
   9   7   0      86      13                                                          28   -7.72    0.00  1.0000
 -10  -6   0     774      95                                                        1249   14.54    0.00  1.0000
 -10  -6   0     793      91                                                        1273   14.54    0.00  1.0000
  10   6   0     733      95                                                        1197   14.54    0.00  1.0000
  10   6   0     813      92                                                        1298   14.54    0.00  1.0000
 -11  -5   0    4808     272                                                        4222   -8.44    0.00  1.0000
 -11  -5   0    4746     277                                                        4163   -8.44    0.00  1.0000
  11   5   0    4639     276                                                        4063   -8.44    0.00  1.0000
  11   5   0    4781     272                                                        4196   -8.44    0.00  1.0000
 -12  -4   0    2593     203                                                        3108    9.33    0.00  1.0000
 -12  -4   0    2419     221                                                        2917    9.33    0.00  1.0000
  12   4   0    2625     203                                                        3143    9.33    0.00  1.0000
  12   4   0    2355     207                                                        2846    9.33    0.00  1.0000
 -13  -3   0       8      17                                                           2   -8.13    0.00  1.0000
 -13  -3   0      18      22                                                         -11   -8.13    0.00  1.0000
  13   3   0       5      18                                                           4   -8.13    0.00  1.0000
  13   3   0      18      38                                                         -29   -8.13    0.00  1.0000
 -14  -2   0       0      28                                                           9    4.93    0.00  1.0000
 -14  -2   0       7      18                                                          26    4.93    0.00  1.0000
  14   2   0       7      25                                                         -26    4.93    0.00  1.0000
  14   2   0       7      25                                                          -8    4.93    0.00  1.0000
  14   2   0       7      20                                                         -32    4.93    0.00  1.0000
 -15  -1   0    1054      96                                                         907   -4.55    0.00  1.0000
 -15  -1   0    1164      85                                                        1009   -4.55    0.00  1.0000
  15   1   0    1170      95                                                        1015   -4.55    0.00  1.0000
  15   1   0     929      94                                                         791   -4.55    0.00  1.0000
  15   1   0    1048      84                                                         901   -4.55    0.00  1.0000
 -16   0   0    2094     184                                                        2236    2.94    0.00  1.0000
 -16   0   0    2456     174                                                        2609    2.94    0.00  1.0000
  16   0   0    2352     176                                                        2502    2.94    0.00  1.0000
  16   0   0    1996     182                                                        2134    2.94    0.00  1.0000
  16   0   0    2244     183                                                        2390    2.94    0.00  1.0000
  -3  21   0       0      35                                                         -75   -0.41    0.00  1.0000
  -3  21   0       0      26                                                           0   -0.41    0.00  1.0000
  -2  20   0       5      21                                                          15    3.36    0.00  1.0000
  -2  20   0      11      30                                                          26    3.36    0.00  1.0000
  -1  19   0    1664     127                                                        1622   -0.99    0.00  1.0000
  -1  19   0    1591     114                                                        1550   -0.99    0.00  1.0000
   0  18   0    3818     278                                                        4235    6.36    0.00  1.0000
   0  18   0    3507     266                                                        3907    6.36    0.00  1.0000
   1  17   0     150      20                                                         131   -1.58    0.00  1.0000
   1  17   0     175      33                                                         154   -1.58    0.00  1.0000
   2  16   0       1      10                                                          19    6.11    0.00  1.0000
   2  16   0       3       5                                                          25    6.11    0.00  1.0000
   2  16   0       3      22                                                          25    6.11    0.00  1.0000
   3  15   0    1286      66                                                        1062   -6.33    0.00  1.0000
   3  15   0    1131      70                                                         922   -6.33    0.00  1.0000
   3  15   0    1249      70                                                        1029   -6.33    0.00  1.0000
   3  15   0    1178      86                                                         964   -6.33    0.00  1.0000
  -4 -14   0    4070     235                                                        3993   -1.18    0.00  1.0000
  -4 -14   0    3416     238                                                        3345   -1.18    0.00  1.0000
   4  14   0    4151     237                                                        4073   -1.18    0.00  1.0000
   4  14   0    3572     240                                                        3499   -1.18    0.00  1.0000
  -5 -13   0     477      42                                                         243  -12.09    0.00  1.0000
  -5 -13   0     607      26                                                         338  -12.09    0.00  1.0000
   5  13   0     615      27                                                         344  -12.09    0.00  1.0000
   5  13   0     578      33                                                         317  -12.09    0.00  1.0000
  -6 -12   0      51      14                                                          21    4.98    0.00  1.0000
  -6 -12   0      33       8                                                          10    4.98    0.00  1.0000
   6  12   0      35      11                                                          11    4.98    0.00  1.0000
   6  12   0      79      11                                                          40    4.98    0.00  1.0000
  -7 -11   0    1059      62                                                         766   -9.40    0.00  1.0000
   7  11   0    1194      60                                                         882   -9.40    0.00  1.0000
   7  11   0    1010      62                                                         725   -9.40    0.00  1.0000
  -8 -10   0    3325     238                                                        3468    2.38    0.00  1.0000
  -8 -10   0    3803     235                                                        3956    2.38    0.00  1.0000
   8  10   0    3562     235                                                        3710    2.38    0.00  1.0000
   8  10   0    3211     238                                                        3352    2.38    0.00  1.0000
  -9  -9   0    1752     125                                                        1696   -1.30    0.00  1.0000
  -9  -9   0    1964     123                                                        1905   -1.30    0.00  1.0000
   9   9   0    1750     126                                                        1694   -1.30    0.00  1.0000
   9   9   0    1900     123                                                        1842   -1.30    0.00  1.0000
 -10  -8   0      65      24                                                         105    4.22    0.00  1.0000
 -10  -8   0      99      24                                                         147    4.22    0.00  1.0000
  10   8   0      95      22                                                         142    4.22    0.00  1.0000
  10   8   0      55      24                                                          92    4.22    0.00  1.0000
 -11  -7   0     280      24                                                         118  -11.32    0.00  1.0000
 -11  -7   0     389      29                                                         192  -11.32    0.00  1.0000
  11   7   0     298      27                                                         130  -11.32    0.00  1.0000
  11   7   0     389      29                                                         192  -11.32    0.00  1.0000
 -12  -6   0     912      86                                                        1168    7.70    0.00  1.0000
 -12  -6   0     836      92                                                        1082    7.70    0.00  1.0000
  12   6   0     783      91                                                        1022    7.70    0.00  1.0000
  12   6   0     902      87                                                        1157    7.70    0.00  1.0000
 -13  -5   0     133      19                                                          59   -7.59    0.00  1.0000
 -13  -5   0     157      27                                                          75   -7.59    0.00  1.0000
  13   5   0     127      22                                                          55   -7.59    0.00  1.0000
  13   5   0      70      24                                                          20   -7.59    0.00  1.0000
 -14  -4   0     135      30                                                          64    7.01    0.00  1.0000
 -14  -4   0     191      27                                                         104    7.01    0.00  1.0000
  14   4   0     149      31                                                          74    7.01    0.00  1.0000
  14   4   0      89      29                                                          34    7.01    0.00  1.0000
  14   4   0      91      32                                                          35    7.01    0.00  1.0000
 -15  -3   0     154      42                                                         208   -3.90    0.00  1.0000
 -15  -3   0     190      51                                                         250   -3.90    0.00  1.0000
  15   3   0     183      40                                                         241   -3.90    0.00  1.0000
  15   3   0     139      43                                                         190   -3.90    0.00  1.0000
  15   3   0     113      46                                                         160   -3.90    0.00  1.0000
 -16  -2   0     177      54                                                         223    3.17    0.00  1.0000
 -16  -2   0     229      45                                                         281    3.17    0.00  1.0000
  16   2   0     161      49                                                         205    3.17    0.00  1.0000
  16   2   0     129      43                                                         169    3.17    0.00  1.0000
  16   2   0     113      48                                                         151    3.17    0.00  1.0000
  -2  22   0       0      41                                                         -44   -1.10    0.00  1.0000
  -2  22   0       0      25                                                         -41   -1.10    0.00  1.0000
  -1  21   0     104      41                                                          98   -0.61    0.00  1.0000
  -1  21   0      68      23                                                          63   -0.61    0.00  1.0000
   0  20   0    1266      91                                                        1157   -3.02    0.00  1.0000
   0  20   0    1321     110                                                        1210   -3.02    0.00  1.0000
   1  19   0    1823     138                                                        1779   -0.99    0.00  1.0000
   1  19   0    1670     118                                                        1628   -0.99    0.00  1.0000
   2  18   0      84      17                                                         108   -2.38    0.00  1.0000
   2  18   0      68      31                                                          90   -2.38    0.00  1.0000
   3  17   0      53       9                                                          60   -0.96    0.00  1.0000
   3  17   0      58      14                                                          66   -0.96    0.00  1.0000
   3  17   0      88      18                                                          97   -0.96    0.00  1.0000
   3  17   0      76      30                                                          85   -0.96    0.00  1.0000
  -4 -16   0     174      24                                                         215    2.87    0.00  1.0000
  -4 -16   0     212      19                                                         257    2.87    0.00  1.0000
   4  16   0     206      46                                                         251    2.87    0.00  1.0000
   4  16   0     188      21                                                         231    2.87    0.00  1.0000
   4  16   0     231      32                                                         278    2.87    0.00  1.0000
   4  16   0     192      25                                                         235    2.87    0.00  1.0000
  -5 -15   0     471      36                                                         526    2.37    0.00  1.0000
  -5 -15   0     380      41                                                         429    2.37    0.00  1.0000
   5  15   0     386      44                                                         436    2.37    0.00  1.0000
   5  15   0     479      38                                                         534    2.37    0.00  1.0000
  -6 -14   0     605      34                                                         459    6.12    0.00  1.0000
  -6 -14   0     499      39                                                         368    6.12    0.00  1.0000
   6  14   0     586      35                                                         443    6.12    0.00  1.0000
   6  14   0     518      41                                                         384    6.12    0.00  1.0000
  -7 -13   0    1971     135                                                        2169   -4.21    0.00  1.0000
   7  13   0    1893     137                                                        2087   -4.21    0.00  1.0000
   7  13   0    1683     140                                                        1866   -4.21    0.00  1.0000
  -8 -12   0       3      13                                                          20    5.35    0.00  1.0000
   8  12   0       4      14                                                          22    5.35    0.00  1.0000
   8  12   0      12      13                                                          39    5.35    0.00  1.0000
  -9 -11   0     272      37                                                         257   -0.88    0.00  1.0000
  -9 -11   0     428      36                                                         409   -0.88    0.00  1.0000
   9  11   0     349      40                                                         332   -0.88    0.00  1.0000
   9  11   0     385      41                                                         367   -0.88    0.00  1.0000
 -10 -10   0      14      17                                                          21   -1.52    0.00  1.0000
 -10 -10   0       2      12                                                           5   -1.52    0.00  1.0000
  10  10   0      27      19                                                          36   -1.52    0.00  1.0000
  10  10   0       1      25                                                           3   -1.52    0.00  1.0000
 -11  -9   0    3039     185                                                        2950    1.58    0.00  1.0000
 -11  -9   0    2639     189                                                        2556    1.58    0.00  1.0000
  11   9   0    2877     186                                                        2790    1.58    0.00  1.0000
  11   9   0    2754     190                                                        2669    1.58    0.00  1.0000
 -12  -8   0    1628     119                                                        1456    4.23    0.00  1.0000
 -12  -8   0    1850     113                                                        1667    4.23    0.00  1.0000
  12   8   0    1749     113                                                        1571    4.23    0.00  1.0000
  12   8   0    1631     120                                                        1459    4.23    0.00  1.0000
 -13  -7   0     245      45                                                         298   -3.13    0.00  1.0000
 -13  -7   0     240      42                                                         293   -3.13    0.00  1.0000
  13   7   0     204      38                                                         253   -3.13    0.00  1.0000
  13   7   0     223      46                                                         274   -3.13    0.00  1.0000
 -14  -6   0     274      42                                                         218    3.47    0.00  1.0000
 -14  -6   0     351      44                                                         287    3.47    0.00  1.0000
  14   6   0     300      37                                                         241    3.47    0.00  1.0000
 -15  -5   0    1329     137                                                        1493   -4.23    0.00  1.0000
 -15  -5   0    1641     126                                                        1823   -4.23    0.00  1.0000
  15   5   0    1551     127                                                        1728   -4.23    0.00  1.0000
  15   5   0    1260     135                                                        1420   -4.23    0.00  1.0000
  15   5   0    1370     131                                                        1537   -4.23    0.00  1.0000
   0  22   0     633      79                                                         553    3.18    0.00  1.0000
   0  22   0     527      60                                                         454    3.18    0.00  1.0000
   1  21   0      60      23                                                          55   -0.61    0.00  1.0000
   1  21   0      63      41                                                          58   -0.61    0.00  1.0000
   2  20   0       6      16                                                          18    3.36    0.00  1.0000
   2  20   0       0      34                                                           3    3.36    0.00  1.0000
   3  19   0    2579     194                                                        2638   -1.11    0.00  1.0000
   3  19   0    2444     171                                                        2501   -1.11    0.00  1.0000
   4  18   0    3485     243                                                        3344    2.34    0.00  1.0000
   4  18   0    3520     219                                                        3378    2.34    0.00  1.0000
   4  18   0    3590     221                                                        3447    2.34    0.00  1.0000
  -5 -17   0     111      18                                                         156   -3.79    0.00  1.0000
   5  17   0     129      42                                                         177   -3.79    0.00  1.0000
   5  17   0     200      38                                                         259   -3.79    0.00  1.0000
   5  17   0     103      19                                                         147   -3.79    0.00  1.0000
   5  17   0     148      23                                                         200   -3.79    0.00  1.0000
  -6 -16   0      34      10                                                          35    0.17    0.00  1.0000
   6  16   0      31      10                                                          32    0.17    0.00  1.0000
   6  16   0      58      20                                                          59    0.17    0.00  1.0000
  -7 -15   0    1038      79                                                        1198   -4.64    0.00  1.0000
   7  15   0    1030      81                                                        1190   -4.64    0.00  1.0000
   7  15   0     881      87                                                        1029   -4.64    0.00  1.0000
  -8 -14   0    1719      97                                                        1476    5.89    0.00  1.0000
   8  14   0    1453     102                                                        1230    5.89    0.00  1.0000
   8  14   0    1727      99                                                        1483    5.89    0.00  1.0000
   9  13   0     329      41                                                         459   -6.34    0.00  1.0000
   9  13   0     215      44                                                         322   -6.34    0.00  1.0000
 -10 -12   0      27      18                                                          11    3.64    0.00  1.0000
 -10 -12   0      35      15                                                          16    3.64    0.00  1.0000
  10  12   0      36      19                                                          17    3.64    0.00  1.0000
  10  12   0      63      16                                                          37    3.64    0.00  1.0000
 -11 -11   0    1183     100                                                        1233   -1.39    0.00  1.0000
 -11 -11   0    1300      94                                                        1352   -1.39    0.00  1.0000
  11  11   0    1283      95                                                        1335   -1.39    0.00  1.0000
  11  11   0    1040     100                                                        1087   -1.39    0.00  1.0000
 -12 -10   0    2979     218                                                        3025   -0.81    0.00  1.0000
 -12 -10   0    3321     212                                                        3369   -0.81    0.00  1.0000
  12  10   0    3289     214                                                        3337   -0.81    0.00  1.0000
  12  10   0    2838     218                                                        2883   -0.81    0.00  1.0000
 -13  -9   0     621      75                                                         676   -2.08    0.00  1.0000
 -13  -9   0     676      65                                                         733   -2.08    0.00  1.0000
  13   9   0     648      68                                                         704   -2.08    0.00  1.0000
  13   9   0     559      75                                                         611   -2.08    0.00  1.0000
 -14  -8   0      75      28                                                          87    1.25    0.00  1.0000
 -14  -8   0      31      36                                                          39    1.25    0.00  1.0000
  14   8   0      50      38                                                          60    1.25    0.00  1.0000
  14   8   0      60      28                                                          70    1.25    0.00  1.0000
 -15  -7   0      99      32                                                         109   -0.94    0.00  1.0000
 -15  -7   0      68      44                                                          76   -0.94    0.00  1.0000
  15   7   0      47      43                                                          54   -0.94    0.00  1.0000
  15   7   0     118      34                                                         129   -0.94    0.00  1.0000
   2  22   0      19      25                                                          14   -1.10    0.00  1.0000
   2  22   0       0      46                                                         -23   -1.10    0.00  1.0000
   3  21   0      22      44                                                          24   -0.41    0.00  1.0000
   3  21   0       0      18                                                           0   -0.41    0.00  1.0000
   4  20   0    1084     116                                                        1095   -0.32    0.00  1.0000
   4  20   0    1200      86                                                        1211   -0.32    0.00  1.0000
   4  20   0    1073      74                                                        1084   -0.32    0.00  1.0000
   4  20   0    1160      84                                                        1171   -0.32    0.00  1.0000
   5  19   0    1353      94                                                        1355   -0.06    0.00  1.0000
   5  19   0    1252     122                                                        1254   -0.06    0.00  1.0000
   5  19   0    1390     101                                                        1392   -0.06    0.00  1.0000
  -6 -18   0     269      37                                                         285    0.90    0.00  1.0000
  -6 -18   0     327      28                                                         344    0.90    0.00  1.0000
   6  18   0     402      50                                                         421    0.90    0.00  1.0000
   6  18   0     266      50                                                         281    0.90    0.00  1.0000
   6  18   0     342      33                                                         360    0.90    0.00  1.0000
   6  18   0     294      29                                                         310    0.90    0.00  1.0000
  -7 -17   0     189      24                                                         208    1.28    0.00  1.0000
  -7 -17   0     137      28                                                         153    1.28    0.00  1.0000
   7  17   0     278      48                                                         301    1.28    0.00  1.0000
   7  17   0     212      26                                                         232    1.28    0.00  1.0000
  -8 -16   0     377      47                                                         371    0.29    0.00  1.0000
  -8 -16   0     405      38                                                         399    0.29    0.00  1.0000
   8  16   0     469      40                                                         463    0.29    0.00  1.0000
   8  16   0     499      57                                                         492    0.29    0.00  1.0000
  -9 -15   0     209      35                                                         248   -2.52    0.00  1.0000
  -9 -15   0     209      31                                                         248   -2.52    0.00  1.0000
   9  15   0     247      31                                                         290   -2.52    0.00  1.0000
   9  15   0     168      37                                                         203   -2.52    0.00  1.0000
 -10 -14   0     279      50                                                         338    3.24    0.00  1.0000
 -10 -14   0     428      53                                                         500    3.24    0.00  1.0000
  10  14   0     250      48                                                         306    3.24    0.00  1.0000
  10  14   0     385      43                                                         454    3.24    0.00  1.0000
 -11 -13   0    1285      85                                                        1209   -2.07    0.00  1.0000
 -11 -13   0    1042      90                                                         974   -2.07    0.00  1.0000
  11  13   0     987      93                                                         921   -2.07    0.00  1.0000
  11  13   0    1316      87                                                        1239   -2.07    0.00  1.0000
 -12 -12   0      62      29                                                          73    1.25    0.00  1.0000
 -12 -12   0      93      25                                                         106    1.25    0.00  1.0000
  12  12   0      59      33                                                          69    1.25    0.00  1.0000
  12  12   0     126      28                                                         141    1.25    0.00  1.0000
 -13 -11   0      25      32                                                          22    0.52    0.00  1.0000
 -13 -11   0      69      25                                                          65    0.52    0.00  1.0000
  13  11   0      28      33                                                          25    0.52    0.00  1.0000
 -14 -10   0     168      34                                                         182    1.04    0.00  1.0000
 -14 -10   0      99      43                                                         110    1.04    0.00  1.0000
  14  10   0     148      46                                                         161    1.04    0.00  1.0000
   5  21   0      32      29                                                          37   -0.77    0.00  1.0000
   5  21   0       6      45                                                           8   -0.77    0.00  1.0000
   5  21   0      47      19                                                          53   -0.77    0.00  1.0000
   5  21   0      15      10                                                          18   -0.77    0.00  1.0000
   6  20   0       0      16                                                          -1    1.14    0.00  1.0000
   6  20   0      14      30                                                          10    1.14    0.00  1.0000
   6  20   0       0      41                                                         -37    1.14    0.00  1.0000
  -7 -19   0    1952     142                                                        1880   -1.58    0.00  1.0000
  -7 -19   0    2147     135                                                        2072   -1.58    0.00  1.0000
   7  19   0    2140     141                                                        2065   -1.58    0.00  1.0000
   7  19   0    2120     172                                                        2045   -1.58    0.00  1.0000
   7  19   0    2360     138                                                        2281   -1.58    0.00  1.0000
   7  19   0    2259     152                                                        2182   -1.58    0.00  1.0000
  -8 -18   0    1398     117                                                        1419    0.55    0.00  1.0000
  -8 -18   0    1679     108                                                        1702    0.55    0.00  1.0000
   8  18   0    1339     141                                                        1360    0.55    0.00  1.0000
   8  18   0    1751     111                                                        1775    0.55    0.00  1.0000
   8  18   0    1599     126                                                        1622    0.55    0.00  1.0000
  -9 -17   0      31      25                                                          28   -0.47    0.00  1.0000
  -9 -17   0      16      16                                                          14   -0.47    0.00  1.0000
   9  17   0      20      14                                                          18   -0.47    0.00  1.0000
   9  17   0      64      34                                                          60   -0.47    0.00  1.0000
 -10 -16   0      13      17                                                          22    2.06    0.00  1.0000
 -10 -16   0      15      25                                                          25    2.06    0.00  1.0000
  10  16   0       5      16                                                          11    2.06    0.00  1.0000
 -11 -15   0    1299      97                                                        1206   -2.55    0.00  1.0000
 -11 -15   0    1186      97                                                        1097   -2.55    0.00  1.0000
  11  15   0    1310      89                                                        1216   -2.55    0.00  1.0000
 -12 -14   0    2144     175                                                        2227    1.72    0.00  1.0000
 -12 -14   0    2774     171                                                        2868    1.72    0.00  1.0000
  12  14   0    2570     172                                                        2661    1.72    0.00  1.0000
  12  14   0    1969     179                                                        2049    1.72    0.00  1.0000
 -13 -13   0     877      75                                                         838   -1.30    0.00  1.0000
  13  13   0     803      77                                                         765   -1.30    0.00  1.0000
  11  17  -1     342      40                                                         325    0.91    0.00  1.0000
 -11 -17   1     398      42                                                         380    0.91    0.00  1.0000
  10  18  -1      85      39                                                          91    0.65    0.00  1.0000
  10  18  -1      32      15                                                          36    0.65    0.00  1.0000
 -10 -18   1       5      18                                                           7    0.65    0.00  1.0000
 -10 -18   1      34      43                                                          38    0.65    0.00  1.0000
   9  19  -1      68      19                                                          68   -0.03    0.00  1.0000
   9  19  -1     145      39                                                         145   -0.03    0.00  1.0000
   9  19  -1      95      18                                                          95   -0.03    0.00  1.0000
  -9 -19   1      46      27                                                          46   -0.03    0.00  1.0000
  -9 -19   1      80      19                                                          80   -0.03    0.00  1.0000
  14  12  -1     316      43                                                         327    0.61    0.00  1.0000
 -14 -12   1     240      50                                                         250    0.61    0.00  1.0000
 -14 -12   1     318      50                                                         329    0.61    0.00  1.0000
  13  13  -1    1199      92                                                        1224    0.69    0.00  1.0000
  13  13  -1     925     102                                                         947    0.69    0.00  1.0000
 -13 -13   1    1119     104                                                        1143    0.69    0.00  1.0000
 -13 -13   1    1312      93                                                        1338    0.69    0.00  1.0000
  12  14  -1      73      28                                                          65   -0.89    0.00  1.0000
  12  14  -1     119      22                                                         109   -0.89    0.00  1.0000
 -12 -14   1     104      29                                                          95   -0.89    0.00  1.0000
 -12 -14   1      99      24                                                          90   -0.89    0.00  1.0000
  11  15  -1      16      23                                                           8    2.31    0.00  1.0000
  11  15  -1      35      16                                                          22    2.31    0.00  1.0000
 -11 -15   1      49      27                                                          34    2.31    0.00  1.0000
  10  16  -1     460      40                                                         414   -2.15    0.00  1.0000
  10  16  -1     410      51                                                         366   -2.15    0.00  1.0000
 -10 -16   1     566      42                                                         514   -2.15    0.00  1.0000
 -10 -16   1     427      52                                                         382   -2.15    0.00  1.0000
   9  17  -1    2980     174                                                        2928   -0.93    0.00  1.0000
   9  17  -1    2453     182                                                        2406   -0.93    0.00  1.0000
  -9 -17   1    2360     178                                                        2313   -0.93    0.00  1.0000
  -9 -17   1    2836     171                                                        2785   -0.93    0.00  1.0000
   8  18  -1    1038      70                                                        1064    0.79    0.00  1.0000
   8  18  -1     861      82                                                         885    0.79    0.00  1.0000
   8  18  -1     948      69                                                         973    0.79    0.00  1.0000
  -8 -18   1     917      68                                                         942    0.79    0.00  1.0000
  -8 -18   1     924      80                                                         949    0.79    0.00  1.0000
   7  19  -1      71      18                                                          90   -2.00    0.00  1.0000
   7  19  -1      31      39                                                          44   -2.00    0.00  1.0000
   7  19  -1     142      32                                                         168   -2.00    0.00  1.0000
   7  19  -1      89      17                                                         110   -2.00    0.00  1.0000
  -7 -19   1      86      25                                                         106   -2.00    0.00  1.0000
  -7 -19   1     140      20                                                         166   -2.00    0.00  1.0000
   6  20  -1     104      48                                                         116    1.09    0.00  1.0000
   6  20  -1     147      22                                                         161    1.09    0.00  1.0000
   6  20  -1     102      19                                                         114    1.09    0.00  1.0000
   6  20  -1     204      36                                                         220    1.09    0.00  1.0000
   5  21  -1    1859     160                                                        1819   -0.91    0.00  1.0000
   5  21  -1    2009     129                                                        1967   -0.91    0.00  1.0000
   5  21  -1    1701     116                                                        1662   -0.91    0.00  1.0000
  15   9  -1     123      33                                                         114   -0.78    0.00  1.0000
 -15  -9   1      86      41                                                          79   -0.78    0.00  1.0000
 -15  -9   1     155      31                                                         145   -0.78    0.00  1.0000
  14  10  -1      19      23                                                          21    0.40    0.00  1.0000
  14  10  -1       0      29                                                         -51    0.40    0.00  1.0000
 -14 -10   1       0      31                                                         -12    0.40    0.00  1.0000
 -14 -10   1      33      24                                                          35    0.40    0.00  1.0000
  13  11  -1    1423      97                                                        1334   -2.33    0.00  1.0000
  13  11  -1    1136     102                                                        1056   -2.33    0.00  1.0000
 -13 -11   1    1393      94                                                        1305   -2.33    0.00  1.0000
 -13 -11   1    1163     102                                                        1082   -2.33    0.00  1.0000
  12  12  -1    4038     254                                                        4087    0.75    0.00  1.0000
  12  12  -1    3336     259                                                        3381    0.75    0.00  1.0000
 -12 -12   1    3506     258                                                        3552    0.75    0.00  1.0000
 -12 -12   1    4229     253                                                        4280    0.75    0.00  1.0000
  11  13  -1     567      49                                                         569    0.08    0.00  1.0000
  11  13  -1     482      57                                                         484    0.08    0.00  1.0000
 -11 -13   1     601      49                                                         603    0.08    0.00  1.0000
 -11 -13   1     462      55                                                         464    0.08    0.00  1.0000
  10  14  -1     296      40                                                         250   -2.71    0.00  1.0000
  10  14  -1     341      33                                                         291   -2.71    0.00  1.0000
 -10 -14   1     339      41                                                         289   -2.71    0.00  1.0000
   9  15  -1    1777     120                                                        1965    4.20    0.00  1.0000
   9  15  -1    1352     124                                                        1516    4.20    0.00  1.0000
  -9 -15   1    1377     124                                                        1543    4.20    0.00  1.0000
  -9 -15   1    1756     119                                                        1943    4.20    0.00  1.0000
   8  16  -1    4357     253                                                        4308   -0.73    0.00  1.0000
   8  16  -1    3645     258                                                        3600   -0.73    0.00  1.0000
  -8 -16   1    3502     256                                                        3458   -0.73    0.00  1.0000
  -8 -16   1    4334     250                                                        4285   -0.73    0.00  1.0000
   7  17  -1     364      32                                                         372    0.43    0.00  1.0000
   7  17  -1     296      43                                                         304    0.43    0.00  1.0000
   7  17  -1     377      32                                                         386    0.43    0.00  1.0000
  -7 -17   1     352      31                                                         360    0.43    0.00  1.0000
  -7 -17   1     302      40                                                         310    0.43    0.00  1.0000
   6  18  -1     589      55                                                         573    0.66    0.00  1.0000
   6  18  -1     646      48                                                         629    0.66    0.00  1.0000
   6  18  -1     655      45                                                         638    0.66    0.00  1.0000
  -6 -18   1     499      50                                                         484    0.66    0.00  1.0000
  -6 -18   1     663      43                                                         646    0.66    0.00  1.0000
   5  19  -1      82      17                                                          83    0.09    0.00  1.0000
   5  19  -1      61      11                                                          62    0.09    0.00  1.0000
   5  19  -1     119      24                                                         120    0.09    0.00  1.0000
   5  19  -1      15      35                                                          15    0.09    0.00  1.0000
   4  20  -1    2008     128                                                        2025    0.36    0.00  1.0000
   4  20  -1    1709     119                                                        1724    0.36    0.00  1.0000
   4  20  -1    2010     159                                                        2027    0.36    0.00  1.0000
   4  20  -1    1760     128                                                        1776    0.36    0.00  1.0000
   3  21  -1     108      26                                                         122    1.23    0.00  1.0000
   3  21  -1     161      50                                                         178    1.23    0.00  1.0000
   2  22  -1     254      37                                                         254    0.01    0.00  1.0000
   2  22  -1     290      59                                                         290    0.01    0.00  1.0000
  16   6  -1     934     109                                                         862   -2.33    0.00  1.0000
  16   6  -1    1030     102                                                         954   -2.33    0.00  1.0000
  16   6  -1    1381     101                                                        1293   -2.33    0.00  1.0000
 -16  -6   1    1115     113                                                        1036   -2.33    0.00  1.0000
 -16  -6   1    1237      94                                                        1154   -2.33    0.00  1.0000
  15   7  -1     463      71                                                         489    1.17    0.00  1.0000
  15   7  -1     451      70                                                         477    1.17    0.00  1.0000
  15   7  -1     668      69                                                         700    1.17    0.00  1.0000
 -15  -7   1     479      60                                                         506    1.17    0.00  1.0000
 -15  -7   1     468      71                                                         494    1.17    0.00  1.0000
  14   8  -1     180      39                                                         189   -0.67    0.00  1.0000
  14   8  -1     272      45                                                         284   -0.67    0.00  1.0000
 -14  -8   1     129      29                                                         137   -0.67    0.00  1.0000
 -14  -8   1     150      37                                                         159   -0.67    0.00  1.0000
  13   9  -1     101      31                                                          85    1.61    0.00  1.0000
  13   9  -1     195      29                                                         172    1.61    0.00  1.0000
 -13  -9   1     160      26                                                         140    1.61    0.00  1.0000
 -13  -9   1     113      32                                                          96    1.61    0.00  1.0000
  12  10  -1     893      94                                                         980    2.74    0.00  1.0000
  12  10  -1    1165      91                                                        1264    2.74    0.00  1.0000
 -12 -10   1    1252      89                                                        1354    2.74    0.00  1.0000
 -12 -10   1     957      94                                                        1047    2.74    0.00  1.0000
  11  11  -1     798      71                                                         720   -2.74    0.00  1.0000
  11  11  -1    1009      67                                                         921   -2.74    0.00  1.0000
 -11 -11   1     748      68                                                         673   -2.74    0.00  1.0000
 -11 -11   1     983      65                                                         896   -2.74    0.00  1.0000
  10  12  -1    1424      92                                                        1325    2.58    0.00  1.0000
  10  12  -1    1143      95                                                        1055    2.58    0.00  1.0000
 -10 -12   1    1511      91                                                        1409    2.58    0.00  1.0000
   9  13  -1    1510     121                                                        1504    0.15    0.00  1.0000
   9  13  -1    1850     117                                                        1843    0.15    0.00  1.0000
  -9 -13   1    1770     117                                                        1764    0.15    0.00  1.0000
   8  14  -1       2      14                                                           0   -2.70    0.00  1.0000
   8  14  -1      11      11                                                          22   -2.70    0.00  1.0000
  -8 -14   1       9      11                                                          19   -2.70    0.00  1.0000
   7  15  -1     600      57                                                         587   -0.51    0.00  1.0000
   7  15  -1     746      51                                                         732   -0.51    0.00  1.0000
  -7 -15   1     726      50                                                         712   -0.51    0.00  1.0000
   6  16  -1     751      59                                                         690    2.20    0.00  1.0000
   6  16  -1     842      53                                                         777    2.20    0.00  1.0000
   6  16  -1     829      53                                                         765    2.20    0.00  1.0000
  -6 -16   1     776      51                                                         714    2.20    0.00  1.0000
   5  17  -1    5030     319                                                        5248   -2.94    0.00  1.0000
   5  17  -1    4642     321                                                        4851   -2.94    0.00  1.0000
  -5 -17   1    4741     314                                                        4952   -2.94    0.00  1.0000
   4  18  -1    1050      67                                                         984    2.00    0.00  1.0000
   4  18  -1    1098      73                                                        1031    2.00    0.00  1.0000
   4  18  -1    1029      99                                                         964    2.00    0.00  1.0000
   4  18  -1    1140      75                                                        1071    2.00    0.00  1.0000
   3  19  -1      93      32                                                          58   -3.96    0.00  1.0000
   3  19  -1     149      19                                                         103   -3.96    0.00  1.0000
   2  20  -1     205      44                                                         194    0.73    0.00  1.0000
   2  20  -1      92      41                                                          85    0.73    0.00  1.0000
   1  21  -1    1562     139                                                        1695   -3.18    0.00  1.0000
   1  21  -1    1389     116                                                        1514   -3.18    0.00  1.0000
   0  22  -1     523      75                                                         512    0.48    0.00  1.0000
   0  22  -1     425      58                                                         415    0.48    0.00  1.0000
  16   4  -1     487      75                                                         524   -1.58    0.00  1.0000
  16   4  -1     403      68                                                         436   -1.58    0.00  1.0000
 -16  -4   1     444      60                                                         479   -1.58    0.00  1.0000
 -16  -4   1     382      63                                                         415   -1.58    0.00  1.0000
  15   5  -1       2      27                                                          -5    2.66    0.00  1.0000
  15   5  -1       2      30                                                         -67    2.66    0.00  1.0000
  15   5  -1      26      27                                                          42    2.66    0.00  1.0000
 -15  -5   1       8      34                                                          17    2.66    0.00  1.0000
 -15  -5   1       0      22                                                           1    2.66    0.00  1.0000
  14   6  -1     610      61                                                         648   -1.48    0.00  1.0000
  14   6  -1     488      65                                                         522   -1.48    0.00  1.0000
 -14  -6   1     503      68                                                         538   -1.48    0.00  1.0000
 -14  -6   1     491      55                                                         525   -1.48    0.00  1.0000
  13   7  -1    2216     164                                                        2180    0.74    0.00  1.0000
  13   7  -1    2405     161                                                        2368    0.74    0.00  1.0000
 -13  -7   1    2244     163                                                        2208    0.74    0.00  1.0000
 -13  -7   1    2325     156                                                        2288    0.74    0.00  1.0000
  12   8  -1    2673     200                                                        2894   -4.04    0.00  1.0000
  12   8  -1    2623     203                                                        2842   -4.04    0.00  1.0000
 -12  -8   1    2799     193                                                        3025   -4.04    0.00  1.0000
 -12  -8   1    2533     198                                                        2748   -4.04    0.00  1.0000
  11   9  -1     110      25                                                         123   -1.18    0.00  1.0000
 -11  -9   1     101      25                                                         114   -1.18    0.00  1.0000
 -11  -9   1     167      27                                                         183   -1.18    0.00  1.0000
  10  10  -1     820      70                                                         746    2.56    0.00  1.0000
  10  10  -1    1041      68                                                         957    2.56    0.00  1.0000
 -10 -10   1    1043      66                                                         959    2.56    0.00  1.0000
 -10 -10   1     845      69                                                         770    2.56    0.00  1.0000
   9  11  -1    5007     315                                                        5205   -2.68    0.00  1.0000
   9  11  -1    4348     318                                                        4533   -2.68    0.00  1.0000
  -9 -11   1    4024     316                                                        4202   -2.68    0.00  1.0000
  -9 -11   1    5423     314                                                        5629   -2.68    0.00  1.0000
   8  12  -1    4832     303                                                        4884   -0.72    0.00  1.0000
   8  12  -1    3912     305                                                        3959   -0.72    0.00  1.0000
  -8 -12   1    5295     304                                                        5349   -0.72    0.00  1.0000
   7  13  -1     893      54                                                         782    3.70    0.00  1.0000
   7  13  -1     741      57                                                         640    3.70    0.00  1.0000
  -7 -13   1     949      53                                                         835    3.70    0.00  1.0000
  -7 -13   1     746      57                                                         645    3.70    0.00  1.0000
   6  14  -1     329      30                                                         374   -2.32    0.00  1.0000
   6  14  -1     304      36                                                         347   -2.32    0.00  1.0000
  -6 -14   1     339      29                                                         385   -2.32    0.00  1.0000
  -6 -14   1     280      34                                                         322   -2.32    0.00  1.0000
   5  15  -1    1912     141                                                        1988   -1.66    0.00  1.0000
   5  15  -1    2178     138                                                        2259   -1.66    0.00  1.0000
   5  15  -1    2233     137                                                        2315   -1.66    0.00  1.0000
  -5 -15   1    1859     140                                                        1934   -1.66    0.00  1.0000
  -5 -15   1    2022     135                                                        2100   -1.66    0.00  1.0000
   4  16  -1    1571     105                                                        1492    1.94    0.00  1.0000
   4  16  -1    1638     100                                                        1558    1.94    0.00  1.0000
   4  16  -1    1716     104                                                        1634    1.94    0.00  1.0000
  -4 -16   1    1661      99                                                        1580    1.94    0.00  1.0000
  -4 -16   1    1541     102                                                        1463    1.94    0.00  1.0000
   3  17  -1       4      24                                                           3    0.42    0.00  1.0000
   3  17  -1      53      13                                                          50    0.42    0.00  1.0000
   3  17  -1      45       8                                                          42    0.42    0.00  1.0000
   3  17  -1      42      11                                                          39    0.42    0.00  1.0000
   2  18  -1     508      50                                                         581    3.01    0.00  1.0000
   2  18  -1     497      70                                                         569    3.01    0.00  1.0000
   1  19  -1      17      28                                                           8    2.61    0.00  1.0000
   1  19  -1      42      17                                                          26    2.61    0.00  1.0000
   0  20  -1     993      95                                                         969    0.76    0.00  1.0000
   0  20  -1     887      75                                                         864    0.76    0.00  1.0000
  -1  21  -1      90      40                                                          75    1.65    0.00  1.0000
  -1  21  -1      45      25                                                          34    1.65    0.00  1.0000
  -2  22  -1     361      60                                                         359   -0.10    0.00  1.0000
  -2  22  -1     281      42                                                         279   -0.10    0.00  1.0000
  16   2  -1    2084     187                                                        2182   -2.06    0.00  1.0000
  16   2  -1    2400     209                                                        2506   -2.06    0.00  1.0000
  16   2  -1    2465     184                                                        2572   -2.06    0.00  1.0000
 -16  -2   1    2523     176                                                        2631   -2.06    0.00  1.0000
 -16  -2   1    2326     188                                                        2430   -2.06    0.00  1.0000
  15   3  -1     702      75                                                         645    2.11    0.00  1.0000
  15   3  -1     823      70                                                         762    2.11    0.00  1.0000
  15   3  -1     561      75                                                         511    2.11    0.00  1.0000
 -15  -3   1     713      79                                                         656    2.11    0.00  1.0000
 -15  -3   1     764      66                                                         705    2.11    0.00  1.0000
  14   4  -1      62      20                                                          37   -3.43    0.00  1.0000
  14   4  -1      94      27                                                          63   -3.43    0.00  1.0000
  14   4  -1      78      24                                                          50   -3.43    0.00  1.0000
 -14  -4   1      40      25                                                          21   -3.43    0.00  1.0000
 -14  -4   1      55      19                                                          32   -3.43    0.00  1.0000
  13   5  -1      54      23                                                          40    1.97    0.00  1.0000
  13   5  -1      45      18                                                          32    1.97    0.00  1.0000
 -13  -5   1      86      25                                                          68    1.97    0.00  1.0000
 -13  -5   1      61      19                                                          46    1.97    0.00  1.0000
  12   6  -1    2124     143                                                        2081    0.91    0.00  1.0000
  12   6  -1    2081     148                                                        2038    0.91    0.00  1.0000
 -12  -6   1    1988     147                                                        1946    0.91    0.00  1.0000
 -12  -6   1    2192     142                                                        2148    0.91    0.00  1.0000
  11   7  -1    2179     135                                                        1996    3.88    0.00  1.0000
  11   7  -1    1954     138                                                        1781    3.88    0.00  1.0000
 -11  -7   1    2260     134                                                        2073    3.88    0.00  1.0000
 -11  -7   1    2094     139                                                        1914    3.88    0.00  1.0000
  10   8  -1      41      16                                                          59    2.43    0.00  1.0000
  10   8  -1      63      22                                                          84    2.43    0.00  1.0000
 -10  -8   1      24      14                                                          38    2.43    0.00  1.0000
 -10  -8   1      40      20                                                          58    2.43    0.00  1.0000
   9   9  -1     290      29                                                         185   -6.64    0.00  1.0000
   9   9  -1     401      29                                                         275   -6.64    0.00  1.0000
  -9  -9   1     278      42                                                         175   -6.64    0.00  1.0000
  -9  -9   1     370      27                                                         250   -6.64    0.00  1.0000
   8  10  -1     128      13                                                          51    8.19    0.00  1.0000
   8  10  -1      95      12                                                          31    8.19    0.00  1.0000
  -8 -10   1     115      11                                                          43    8.19    0.00  1.0000
  -8 -10   1      71      18                                                          18    8.19    0.00  1.0000
   7  11  -1     730      66                                                         804   -2.58    0.00  1.0000
   7  11  -1     929      65                                                        1012   -2.58    0.00  1.0000
  -7 -11   1     783      68                                                         859   -2.58    0.00  1.0000
   6  12  -1     211      30                                                         209   -0.17    0.00  1.0000
   6  12  -1     289      25                                                         286   -0.17    0.00  1.0000
  -6 -12   1     273      29                                                         270   -0.17    0.00  1.0000
  -6 -12   1     319      25                                                         316   -0.17    0.00  1.0000
   5  13  -1    1577     102                                                        1714    3.27    0.00  1.0000
   5  13  -1    1307     105                                                        1432    3.27    0.00  1.0000
  -5 -13   1    1256     104                                                        1379    3.27    0.00  1.0000
  -5 -13   1    1505     100                                                        1639    3.27    0.00  1.0000
   4  14  -1     208      23                                                         266    3.62    0.00  1.0000
   4  14  -1     174      26                                                         227    3.62    0.00  1.0000
   4  14  -1     218      21                                                         277    3.62    0.00  1.0000
  -4 -14   1     178      25                                                         232    3.62    0.00  1.0000
  -4 -14   1     217      21                                                         276    3.62    0.00  1.0000
   3  15  -1       1       8                                                          10   -5.01    0.00  1.0000
   3  15  -1       1       6                                                          13   -5.01    0.00  1.0000
   3  15  -1       1       8                                                          10   -5.01    0.00  1.0000
   2  16  -1     405      33                                                         445    1.90    0.00  1.0000
   2  16  -1     376      37                                                         415    1.90    0.00  1.0000
   2  16  -1     375      54                                                         414    1.90    0.00  1.0000
   1  17  -1    2991     172                                                        2543   -8.24    0.00  1.0000
   1  17  -1    3123     187                                                        2665   -8.24    0.00  1.0000
   0  18  -1    1517     115                                                        1557    0.98    0.00  1.0000
   0  18  -1    1215      99                                                        1251    0.98    0.00  1.0000
  -1  19  -1       2      18                                                          12   -3.69    0.00  1.0000
  -1  19  -1       9      26                                                          24   -3.69    0.00  1.0000
  -2  20  -1     152      37                                                         154    0.17    0.00  1.0000
  -2  20  -1      94      28                                                          96    0.17    0.00  1.0000
  -3  21  -1    1325     113                                                        1306   -0.49    0.00  1.0000
  -3  21  -1    1225     103                                                        1207   -0.49    0.00  1.0000
  15   1  -1     134      37                                                         112    1.93    0.00  1.0000
  15   1  -1     201      36                                                         174    1.93    0.00  1.0000
  15   1  -1     226      37                                                         197    1.93    0.00  1.0000
 -15  -1   1     141      39                                                         118    1.93    0.00  1.0000
 -15  -1   1     194      31                                                         167    1.93    0.00  1.0000
  14   2  -1      41      20                                                          25   -2.66    0.00  1.0000
  14   2  -1      27      28                                                          15   -2.66    0.00  1.0000
  14   2  -1       2      20                                                         -27   -2.66    0.00  1.0000
 -14  -2   1      74      19                                                          52   -2.66    0.00  1.0000
 -14  -2   1      34      24                                                          20   -2.66    0.00  1.0000
  13   3  -1    1486     119                                                        1700    5.19    0.00  1.0000
  13   3  -1    1406     122                                                        1614    5.19    0.00  1.0000
  13   3  -1    1423     125                                                        1633    5.19    0.00  1.0000
 -13  -3   1    1373     127                                                        1579    5.19    0.00  1.0000
 -13  -3   1    1509     119                                                        1725    5.19    0.00  1.0000
  12   4  -1     897      69                                                         734   -5.54    0.00  1.0000
  12   4  -1     945      64                                                         777   -5.54    0.00  1.0000
 -12  -4   1     927      70                                                         761   -5.54    0.00  1.0000
 -12  -4   1    1009      64                                                         835   -5.54    0.00  1.0000
  11   5  -1      15      12                                                          20    1.11    0.00  1.0000
  11   5  -1      20      17                                                          26    1.11    0.00  1.0000
 -11  -5   1      20      17                                                          25    1.11    0.00  1.0000
 -11  -5   1      35      14                                                          42    1.11    0.00  1.0000
  10   6  -1    1702      97                                                        1381   -7.90    0.00  1.0000
  10   6  -1    1618     100                                                        1306   -7.90    0.00  1.0000
 -10  -6   1    1725      96                                                        1402   -7.90    0.00  1.0000
 -10  -6   1    1660     100                                                        1343   -7.90    0.00  1.0000
   9   7  -1    5836     369                                                        5947    1.40    0.00  1.0000
   9   7  -1    5360     372                                                        5466    1.40    0.00  1.0000
  -9  -7   1    5532     372                                                        5640    1.40    0.00  1.0000
  -9  -7   1    5976     369                                                        6088    1.40    0.00  1.0000
   8   8  -1    5722     427                                                        6308    7.31    0.00  1.0000
   8   8  -1    6423     425                                                        7044    7.31    0.00  1.0000
  -8  -8   1    5711     427                                                        6297    7.31    0.00  1.0000
  -8  -8   1    6557     425                                                        7184    7.31    0.00  1.0000
   7   9  -1     206      13                                                          43  -15.11    0.00  1.0000
   7   9  -1     224      10                                                          51  -15.11    0.00  1.0000
  -7  -9   1     177      13                                                          30  -15.11    0.00  1.0000
  -7  -9   1     222      10                                                          50  -15.11    0.00  1.0000
   6  10  -1     279      32                                                         427    7.67    0.00  1.0000
   6  10  -1     215      34                                                         347    7.67    0.00  1.0000
  -6 -10   1     228      34                                                         364    7.67    0.00  1.0000
   5  11  -1    7692     412                                                        6968   -8.17    0.00  1.0000
   5  11  -1    6694     415                                                        6020   -8.17    0.00  1.0000
  -5 -11   1    6572     413                                                        5904   -8.17    0.00  1.0000
  -5 -11   1    8042     411                                                        7301   -8.17    0.00  1.0000
   4  12  -1    6419     426                                                        6226   -2.35    0.00  1.0000
   4  12  -1    7864     424                                                        7650   -2.35    0.00  1.0000
  -4 -12   1    6330     425                                                        6138   -2.35    0.00  1.0000
  -4 -12   1    7252     422                                                        7046   -2.35    0.00  1.0000
   3  13  -1     771      42                                                         635   -4.97    0.00  1.0000
   3  13  -1     645      41                                                         521   -4.97    0.00  1.0000
  -3 -13   1     714      38                                                         583   -4.97    0.00  1.0000
  -3 -13   1     628      40                                                         506   -4.97    0.00  1.0000
   2  14  -1      78       6                                                          34    5.75    0.00  1.0000
   2  14  -1      57       8                                                          21    5.75    0.00  1.0000
   2  14  -1      73       9                                                          31    5.75    0.00  1.0000
   1  15  -1     564      61                                                         579    0.59    0.00  1.0000
   1  15  -1     580      47                                                         595    0.59    0.00  1.0000
   0  16  -1    1635     136                                                        1962    7.47    0.00  1.0000
   0  16  -1    1724     147                                                        2059    7.47    0.00  1.0000
  -1  17  -1     192      28                                                         192    0.00    0.00  1.0000
  -1  17  -1     228      37                                                         228    0.00    0.00  1.0000
  -2  18  -1     368      46                                                         316    2.74    0.00  1.0000
  -2  18  -1     373      42                                                         320    2.74    0.00  1.0000
  -3  19  -1       0      24                                                           0   -0.07    0.00  1.0000
  -3  19  -1      33      20                                                          33   -0.07    0.00  1.0000
  -4  20  -1     820      82                                                         846    0.86    0.00  1.0000
  -4  20  -1     649      74                                                         672    0.86    0.00  1.0000
  16  -2  -1    2742     183                                                        2855    2.06    0.00  1.0000
  16  -2  -1    2515     189                                                        2623    2.06    0.00  1.0000
  16  -2  -1    2011     185                                                        2108    2.06    0.00  1.0000
 -16   2   1    2179     207                                                        2280    2.06    0.00  1.0000
 -16   2   1    2475     177                                                        2582    2.06    0.00  1.0000
  15  -1  -1     143      31                                                         120   -1.93    0.00  1.0000
  15  -1  -1     148      35                                                         125   -1.93    0.00  1.0000
  15  -1  -1     129      34                                                         107   -1.93    0.00  1.0000
 -15   1   1     178      28                                                         152   -1.93    0.00  1.0000
 -15   1   1     192      40                                                         165   -1.93    0.00  1.0000
  13   1  -1     693      73                                                         716    0.83    0.00  1.0000
  13   1  -1     660      62                                                         682    0.83    0.00  1.0000
  13   1  -1     700      68                                                         723    0.83    0.00  1.0000
 -13  -1   1     706      61                                                         729    0.83    0.00  1.0000
 -13  -1   1     674      67                                                         696    0.83    0.00  1.0000
  12   2  -1    4434     285                                                        4184   -3.69    0.00  1.0000
  12   2  -1    4661     283                                                        4404   -3.69    0.00  1.0000
  12   2  -1    4626     288                                                        4370   -3.69    0.00  1.0000
 -12  -2   1    4620     288                                                        4364   -3.69    0.00  1.0000
 -12  -2   1    4622     282                                                        4366   -3.69    0.00  1.0000
  11   3  -1    1868     157                                                        2191    6.95    0.00  1.0000
  11   3  -1    1950     153                                                        2280    6.95    0.00  1.0000
 -11  -3   1    2012     153                                                        2347    6.95    0.00  1.0000
 -11  -3   1    1864     157                                                        2187    6.95    0.00  1.0000
  10   4  -1       1       9                                                          -8   -2.21    0.00  1.0000
  10   4  -1      10      11                                                           4   -2.21    0.00  1.0000
 -10  -4   1       7      12                                                           2   -2.21    0.00  1.0000
 -10  -4   1      20       9                                                          11   -2.21    0.00  1.0000
   9   5  -1     593      74                                                         975   13.30    0.00  1.0000
  -9  -5   1     658      74                                                        1058   13.30    0.00  1.0000
  -9  -5   1     663      78                                                        1065   13.30    0.00  1.0000
   8   6  -1    1685      90                                                        1227  -11.66    0.00  1.0000
   8   6  -1    1692      87                                                        1233  -11.66    0.00  1.0000
  -8  -6   1    1706      90                                                        1245  -11.66    0.00  1.0000
  -8  -6   1    1775      87                                                        1304  -11.66    0.00  1.0000
   7   7  -1    1601     123                                                        1749    3.51    0.00  1.0000
   7   7  -1    1713     121                                                        1867    3.51    0.00  1.0000
  -7  -7   1    1784     121                                                        1941    3.51    0.00  1.0000
  -7  -7   1    1596     123                                                        1744    3.51    0.00  1.0000
   6   8  -1     530      25                                                         268   12.86    0.00  1.0000
   6   8  -1     500      26                                                         247   12.86    0.00  1.0000
  -6  -8   1     545      27                                                         279   12.86    0.00  1.0000
  -6  -8   1     588      25                                                         310   12.86    0.00  1.0000
   5   9  -1      14       6                                                           8   -2.38    0.00  1.0000
   5   9  -1       4       6                                                           1   -2.38    0.00  1.0000
  -5  -9   1      18       7                                                          11   -2.38    0.00  1.0000
   4  10  -1     837      86                                                        1219   11.55    0.00  1.0000
   4  10  -1     951      84                                                        1355   11.55    0.00  1.0000
  -4 -10   1     785      85                                                        1155   11.55    0.00  1.0000
  -4 -10   1     982      83                                                        1392   11.55    0.00  1.0000
   3  11  -1     142      12                                                          99    3.86    0.00  1.0000
   3  11  -1     130      13                                                          89    3.86    0.00  1.0000
   3  11  -1     162      11                                                         115    3.86    0.00  1.0000
  -3 -11   1     163      13                                                         116    3.86    0.00  1.0000
  -3 -11   1     144      10                                                         100    3.86    0.00  1.0000
   2  12  -1    1632      95                                                        1386    6.14    0.00  1.0000
   2  12  -1    1778      93                                                        1520    6.14    0.00  1.0000
   2  12  -1    1821      97                                                        1560    6.14    0.00  1.0000
  -2 -12   1    1604      94                                                        1360    6.14    0.00  1.0000
  -2 -12   1    1756      93                                                        1500    6.14    0.00  1.0000
   1  13  -1    2683     201                                                        3228   -9.70    0.00  1.0000
   1  13  -1    2580     195                                                        3115   -9.70    0.00  1.0000
   1  13  -1    2469     196                                                        2993   -9.70    0.00  1.0000
   0  14  -1       0      10                                                           0    1.36    0.00  1.0000
   0  14  -1      21      16                                                          26    1.36    0.00  1.0000
  -1  15  -1      27      15                                                           0  -10.03    0.00  1.0000
  -1  15  -1      27      10                                                           0  -10.03    0.00  1.0000
  -2  16  -1     362      42                                                         316    2.41    0.00  1.0000
  -2  16  -1     341      36                                                         297    2.41    0.00  1.0000
  -3  17  -1    1801     150                                                        1942   -3.15    0.00  1.0000
  -3  17  -1    2250     156                                                        2407   -3.15    0.00  1.0000
  -4  18  -1     830      77                                                         836   -0.21    0.00  1.0000
  -4  18  -1     980      82                                                         987   -0.21    0.00  1.0000
  -5  19  -1      54      25                                                          57   -0.39    0.00  1.0000
  -5  19  -1      80      51                                                          84   -0.39    0.00  1.0000
  -6  20  -1     609      75                                                         638   -1.11    0.00  1.0000
  16  -4  -1     514      54                                                         552    1.58    0.00  1.0000
  16  -4  -1     480      69                                                         516    1.58    0.00  1.0000
  16  -4  -1     687      75                                                         731    1.58    0.00  1.0000
  16  -4  -1     451      67                                                         486    1.58    0.00  1.0000
 -16   4   1     501      61                                                         538    1.58    0.00  1.0000
 -16   4   1     402      67                                                         435    1.58    0.00  1.0000
  15  -3  -1     744      70                                                         686   -2.11    0.00  1.0000
  15  -3  -1     811      81                                                         750   -2.11    0.00  1.0000
  15  -3  -1     587      72                                                         535   -2.11    0.00  1.0000
 -15   3   1     737      63                                                         679   -2.11    0.00  1.0000
 -15   3   1     670      76                                                         615   -2.11    0.00  1.0000
  14  -2  -1      22      21                                                          11    2.66    0.00  1.0000
  14  -2  -1      80      28                                                          57    2.66    0.00  1.0000
  14  -2  -1       2      23                                                          -1    2.66    0.00  1.0000
 -14   2   1      38      17                                                          23    2.66    0.00  1.0000
 -14   2   1      60      27                                                          41    2.66    0.00  1.0000
  13  -1  -1     689      62                                                         712   -0.83    0.00  1.0000
  13  -1  -1     685      67                                                         708   -0.83    0.00  1.0000
  13  -1  -1     589      65                                                         610   -0.83    0.00  1.0000
 -13   1   1     659      66                                                         681   -0.83    0.00  1.0000
 -13   1   1     755      61                                                         779   -0.83    0.00  1.0000
  11   1  -1    1067      83                                                        1108    1.21    0.00  1.0000
  11   1  -1    1079      80                                                        1120    1.21    0.00  1.0000
  11   1  -1     994      82                                                        1034    1.21    0.00  1.0000
 -11  -1   1    1055      80                                                        1096    1.21    0.00  1.0000
 -11  -1   1     944      83                                                         983    1.21    0.00  1.0000
  10   2  -1     760      69                                                         924   -5.46    0.00  1.0000
 -10  -2   1     726      72                                                         886   -5.46    0.00  1.0000
 -10  -2   1     756      68                                                         919   -5.46    0.00  1.0000
   9   3  -1    4702     312                                                        4901   -2.78    0.00  1.0000
   9   3  -1    4504     315                                                        4699   -2.78    0.00  1.0000
  -9  -3   1    4780     312                                                        4981   -2.78    0.00  1.0000
  -9  -3   1    4719     315                                                        4919   -2.78    0.00  1.0000
   8   4  -1    2835     211                                                        3317   -8.40    0.00  1.0000
  -8  -4   1    2708     213                                                        3179   -8.40    0.00  1.0000
   7   5  -1     103       7                                                          24   10.12    0.00  1.0000
   7   5  -1      94       9                                                          20   10.12    0.00  1.0000
  -7  -5   1      99       8                                                          22   10.12    0.00  1.0000
  -7  -5   1      92       7                                                          19   10.12    0.00  1.0000
   6   6  -1    1388     107                                                        1669   -6.96    0.00  1.0000
   6   6  -1    1255     108                                                        1523   -6.96    0.00  1.0000
  -6  -6   1    1410     106                                                        1693   -6.96    0.00  1.0000
  -6  -6   1    1276     108                                                        1546   -6.96    0.00  1.0000
   5   7  -1   10275     750                                                       12506  -20.23    0.00  1.0000
   5   7  -1    9809     751                                                       11992  -20.23    0.00  1.0000
  -5  -7   1    9411     751                                                       11551  -20.23    0.00  1.0000
   4   8  -1    7147     407                                                        7007    1.61    0.00  1.0000
   4   8  -1    6337     408                                                        6205    1.61    0.00  1.0000
  -4  -8   1    5987     407                                                        5859    1.61    0.00  1.0000
  -4  -8   1    7020     406                                                        6881    1.61    0.00  1.0000
   3   9  -1    1584     148                                                        2435  -18.45    0.00  1.0000
   3   9  -1    1348     149                                                        2140  -18.45    0.00  1.0000
  -3  -9   1    1554     147                                                        2398  -18.45    0.00  1.0000
   2  10  -1    2090     153                                                        2268   -3.68    0.00  1.0000
   2  10  -1    2374     154                                                        2563   -3.68    0.00  1.0000
  -2 -10   1    2214     151                                                        2397   -3.68    0.00  1.0000
   1  11  -1    2821     193                                                        3171   -6.19    0.00  1.0000
   1  11  -1    2698     197                                                        3040   -6.19    0.00  1.0000
   1  11  -1    2695     194                                                        3037   -6.19    0.00  1.0000
   0  12  -1    4060     195                                                        3209   13.68    0.00  1.0000
   0  12  -1    3835     201                                                        3009   13.68    0.00  1.0000
   0  12  -1    3634     189                                                        2831   13.68    0.00  1.0000
  -1  13  -1     252      39                                                         356   -5.77    0.00  1.0000
  -1  13  -1     228      33                                                         327   -5.77    0.00  1.0000
  -2  14  -1       0      18                                                          58   15.91    0.00  1.0000
  -2  14  -1       3      14                                                          41   15.91    0.00  1.0000
  -3  15  -1     707      85                                                        1040  -10.95    0.00  1.0000
  -3  15  -1     645      83                                                         965  -10.95    0.00  1.0000
   3 -15   1     921      80                                                        1297  -10.95    0.00  1.0000
  -4  16  -1    2240     132                                                        1755   10.51    0.00  1.0000
  -4  16  -1    2114     132                                                        1644   10.51    0.00  1.0000
   4 -16   1    2711     128                                                        2175   10.51    0.00  1.0000
  -5  17  -1     245      46                                                         348   -5.79    0.00  1.0000
  -5  17  -1     220      44                                                         318   -5.79    0.00  1.0000
   5 -17   1     272      40                                                         380   -5.79    0.00  1.0000
  -6  18  -1     649      78                                                         784    4.87    0.00  1.0000
   6 -18   1     824      73                                                         975    4.87    0.00  1.0000
  -7  19  -1      44      29                                                          53   -1.31    0.00  1.0000
   7 -19   1      47      23                                                          57   -1.31    0.00  1.0000
  16  -6  -1    1042     105                                                         966    2.33    0.00  1.0000
  16  -6  -1    1349     118                                                        1262    2.33    0.00  1.0000
  16  -6  -1    1470     107                                                        1379    2.33    0.00  1.0000
 -16   6   1    1332      98                                                        1246    2.33    0.00  1.0000
 -16   6   1    1183     110                                                        1102    2.33    0.00  1.0000
  15  -5  -1       9      35                                                          19   -2.66    0.00  1.0000
  15  -5  -1      38      29                                                          56   -2.66    0.00  1.0000
  15  -5  -1      20      19                                                          34   -2.66    0.00  1.0000
  15  -5  -1       2      27                                                         -12   -2.66    0.00  1.0000
 -15   5   1      16      19                                                          28   -2.66    0.00  1.0000
 -15   5   1       4      30                                                          11   -2.66    0.00  1.0000
  14  -4  -1      77      28                                                          49    3.43    0.00  1.0000
  14  -4  -1      93      18                                                          62    3.43    0.00  1.0000
  14  -4  -1      83      24                                                          54    3.43    0.00  1.0000
  14  -4  -1      66      25                                                          40    3.43    0.00  1.0000
 -14   4   1     104      22                                                          71    3.43    0.00  1.0000
 -14   4   1      55      27                                                          32    3.43    0.00  1.0000
  13  -3  -1    1565     119                                                        1784   -5.19    0.00  1.0000
  13  -3  -1    1254     120                                                        1451   -5.19    0.00  1.0000
  13  -3  -1    1373     127                                                        1579   -5.19    0.00  1.0000
 -13   3   1    1502     117                                                        1717   -5.19    0.00  1.0000
 -13   3   1    1367     122                                                        1573   -5.19    0.00  1.0000
  12  -2  -1    4809     289                                                        4548    3.69    0.00  1.0000
  12  -2  -1    4428     289                                                        4178    3.69    0.00  1.0000
  12  -2  -1    4776     285                                                        4516    3.69    0.00  1.0000
 -12   2   1    4414     288                                                        4164    3.69    0.00  1.0000
 -12   2   1    4707     285                                                        4449    3.69    0.00  1.0000
  11  -1  -1     924      81                                                         962   -1.21    0.00  1.0000
  11  -1  -1    1069      83                                                        1110   -1.21    0.00  1.0000
  11  -1  -1    1087      80                                                        1129   -1.21    0.00  1.0000
 -11   1   1     972      83                                                        1011   -1.21    0.00  1.0000
 -11   1   1    1052      79                                                        1093   -1.21    0.00  1.0000
   9   1  -1    2576     151                                                        2159    8.29    0.00  1.0000
   9   1  -1    2757     150                                                        2325    8.29    0.00  1.0000
  -9  -1   1    2699     150                                                        2272    8.29    0.00  1.0000
  -9  -1   1    2694     153                                                        2267    8.29    0.00  1.0000
   8   2  -1    8233     515                                                        8212    0.22    0.00  1.0000
   8   2  -1    8065     517                                                        8045    0.22    0.00  1.0000
  -8  -2   1    8377     515                                                        8356    0.22    0.00  1.0000
  -8  -2   1    8094     517                                                        8074    0.22    0.00  1.0000
   7   3  -1    3000     155                                                        2360   11.96    0.00  1.0000
  -7  -3   1    3039     157                                                        2395   11.96    0.00  1.0000
   6   4  -1     654      27                                                         308  -15.51    0.00  1.0000
   6   4  -1     669      29                                                         318  -15.51    0.00  1.0000
  -6  -4   1     722      28                                                         355  -15.51    0.00  1.0000
  -6  -4   1     702      29                                                         341  -15.51    0.00  1.0000
   5   5  -1     361      10                                                          53   22.67    0.00  1.0000
   5   5  -1     389      10                                                          64   22.67    0.00  1.0000
  -5  -5   1     410      11                                                          73   22.67    0.00  1.0000
  -5  -5   1     384      11                                                          62   22.67    0.00  1.0000
   4   6  -1    3170     131                                                        2101   20.25    0.00  1.0000
   4   6  -1    2977     131                                                        1944   20.25    0.00  1.0000
  -4  -6   1    3321     131                                                        2224   20.25    0.00  1.0000
  -4  -6   1    2899     131                                                        1881   20.25    0.00  1.0000
   3   7  -1    1189      70                                                         942    7.32    0.00  1.0000
   3   7  -1    1390      69                                                        1122    7.32    0.00  1.0000
  -3  -7   1    1485      69                                                        1208    7.32    0.00  1.0000
  -3  -7   1    1184      69                                                         938    7.32    0.00  1.0000
   2   8  -1    1943     168                                                        2748   16.12    0.00  1.0000
   2   8  -1    1970     167                                                        2780   16.12    0.00  1.0000
   2   8  -1    1729     168                                                        2492   16.12    0.00  1.0000
  -2  -8   1    1838     167                                                        2623   16.12    0.00  1.0000
   1   9  -1     883      83                                                        1381   14.41    0.00  1.0000
   1   9  -1     865      86                                                        1359   14.41    0.00  1.0000
   1   9  -1     883      83                                                        1382   14.41    0.00  1.0000
  -1  -9   1     779      82                                                        1250   14.41    0.00  1.0000
  -1  -9   1     679      82                                                        1123   14.41    0.00  1.0000
   0  10  -1     563      65                                                         897  -12.03    0.00  1.0000
   0  10  -1     698      60                                                        1066  -12.03    0.00  1.0000
   0  10  -1     514      60                                                         835  -12.03    0.00  1.0000
  -1  11  -1       9       5                                                          -4    5.71    0.00  1.0000
  -1  11  -1       9       7                                                          -1    5.71    0.00  1.0000
  -1  11  -1      23       2                                                           5    5.71    0.00  1.0000
  -1  11  -1      27       9                                                           7    5.71    0.00  1.0000
   1 -11   1      19       6                                                           3    5.71    0.00  1.0000
  -2  12  -1    1702      91                                                        1117  -15.15    0.00  1.0000
  -2  12  -1    1868      86                                                        1252  -15.15    0.00  1.0000
  -2  12  -1    1827      94                                                        1219  -15.15    0.00  1.0000
  -2  12  -1    2070      84                                                        1419  -15.15    0.00  1.0000
   2 -12   1    2230      90                                                        1552  -15.15    0.00  1.0000
  -3  13  -1    3779     266                                                        4115    5.18    0.00  1.0000
  -3  13  -1    3549     274                                                        3875    5.18    0.00  1.0000
  -3  13  -1    4010     264                                                        4356    5.18    0.00  1.0000
  -3  13  -1    3658     274                                                        3989    5.18    0.00  1.0000
   3 -13   1    4394     270                                                        4756    5.18    0.00  1.0000
  -4  14  -1      24      10                                                          51   -4.43    0.00  1.0000
  -4  14  -1      14       7                                                          36   -4.43    0.00  1.0000
  -4  14  -1      15      16                                                          38   -4.43    0.00  1.0000
  -4  14  -1       2      14                                                          13   -4.43    0.00  1.0000
   4 -14   1      16      12                                                          40   -4.43    0.00  1.0000
  -5  15  -1     519      39                                                         496    1.00    0.00  1.0000
  -5  15  -1     580      49                                                         555    1.00    0.00  1.0000
  -5  15  -1     539      38                                                         515    1.00    0.00  1.0000
  -5  15  -1     458      51                                                         436    1.00    0.00  1.0000
   5 -15   1     606      46                                                         581    1.00    0.00  1.0000
  -6  16  -1     659      58                                                         611   -1.86    0.00  1.0000
  -6  16  -1     726      47                                                         675   -1.86    0.00  1.0000
  -6  16  -1     661      48                                                         613   -1.86    0.00  1.0000
   6 -16   1     731      57                                                         680   -1.86    0.00  1.0000
  -7  17  -1    3298     207                                                        3253   -0.76    0.00  1.0000
  -7  17  -1    3225     208                                                        3180   -0.76    0.00  1.0000
  -7  17  -1    3119     216                                                        3075   -0.76    0.00  1.0000
   7 -17   1    3471     216                                                        3425   -0.76    0.00  1.0000
  -8  18  -1     652      49                                                         634   -0.70    0.00  1.0000
  -8  18  -1     597      50                                                         579   -0.70    0.00  1.0000
   8 -18   1     684      64                                                         665   -0.70    0.00  1.0000
  15  -7  -1     538      85                                                         566   -1.17    0.00  1.0000
  15  -7  -1     439      66                                                         465   -1.17    0.00  1.0000
 -15   7   1     546      71                                                         575   -1.17    0.00  1.0000
 -15   7   1     615      59                                                         645   -1.17    0.00  1.0000
  14  -6  -1     548      61                                                         584    1.48    0.00  1.0000
  14  -6  -1     557      71                                                         594    1.48    0.00  1.0000
  14  -6  -1     435      60                                                         467    1.48    0.00  1.0000
  14  -6  -1     494      47                                                         529    1.48    0.00  1.0000
 -14   6   1     463      64                                                         496    1.48    0.00  1.0000
 -14   6   1     544      54                                                         580    1.48    0.00  1.0000
  13  -5  -1      80      29                                                          63   -1.97    0.00  1.0000
  13  -5  -1      99      16                                                          80   -1.97    0.00  1.0000
  13  -5  -1      36      20                                                          25   -1.97    0.00  1.0000
  13  -5  -1      46      21                                                          33   -1.97    0.00  1.0000
 -13   5   1      81      19                                                          64   -1.97    0.00  1.0000
 -13   5   1      72      25                                                          56   -1.97    0.00  1.0000
  12  -4  -1     906      67                                                         742    5.54    0.00  1.0000
  12  -4  -1    1013      72                                                         839    5.54    0.00  1.0000
  12  -4  -1     982      65                                                         811    5.54    0.00  1.0000
 -12   4   1     903      69                                                         739    5.54    0.00  1.0000
 -12   4   1    1012      64                                                         838    5.54    0.00  1.0000
  11  -3  -1    1871     158                                                        2195   -6.95    0.00  1.0000
  11  -3  -1    2079     156                                                        2420   -6.95    0.00  1.0000
  11  -3  -1    2039     159                                                        2376   -6.95    0.00  1.0000
 -11   3   1    1808     158                                                        2126   -6.95    0.00  1.0000
 -11   3   1    2072     156                                                        2412   -6.95    0.00  1.0000
  10  -2  -1     772      72                                                         937    5.46    0.00  1.0000
  10  -2  -1     799      70                                                         967    5.46    0.00  1.0000
  10  -2  -1     766      71                                                         930    5.46    0.00  1.0000
 -10   2   1     754      68                                                         917    5.46    0.00  1.0000
 -10   2   1     686      71                                                         842    5.46    0.00  1.0000
   9  -1  -1    2810     152                                                        2374   -8.29    0.00  1.0000
   9  -1  -1    2677     153                                                        2252   -8.29    0.00  1.0000
  -9   1   1    2660     151                                                        2236   -8.29    0.00  1.0000
  -9   1   1    2669     154                                                        2244   -8.29    0.00  1.0000
   7   1  -1    4204     307                                                        4973  -10.97    0.00  1.0000
   7   1  -1    3864     308                                                        4602  -10.97    0.00  1.0000
  -7  -1   1    4162     307                                                        4927  -10.97    0.00  1.0000
   6   2  -1    3423     220                                                        3364   -0.98    0.00  1.0000
  -6  -2   1    3558     219                                                        3498   -0.98    0.00  1.0000
   5   3  -1   17370    1089                                                       17516    1.07    0.00  1.0000
   5   3  -1   17407    1088                                                       17553    1.07    0.00  1.0000
  -5  -3   1   17780    1087                                                       17928    1.07    0.00  1.0000
  -5  -3   1   16772    1088                                                       16916    1.07    0.00  1.0000
   4   4  -1     867      24                                                         304  -23.26    0.00  1.0000
   4   4  -1     838      23                                                         287  -23.26    0.00  1.0000
  -4  -4   1     865      22                                                         303  -23.26    0.00  1.0000
  -4  -4   1     818      23                                                         275  -23.26    0.00  1.0000
   3   5  -1     830     151                                                        2549  -41.89    0.00  1.0000
   3   5  -1     729     151                                                        2370  -41.89    0.00  1.0000
  -3  -5   1     641     151                                                        2208  -41.89    0.00  1.0000
   2   6  -1    1704     166                                                        2379   14.48    0.00  1.0000
   2   6  -1    2167     165                                                        2921   14.48    0.00  1.0000
  -2  -6   1    2135     164                                                        2884   14.48    0.00  1.0000
  -2  -6   1    1625     165                                                        2285   14.48    0.00  1.0000
   1   7  -1   35895    1516                                                       26155  -53.60    0.00  1.0000
   1   7  -1   34705    1522                                                       25141  -53.60    0.00  1.0000
   1   7  -1   33400    1514                                                       24032  -53.60    0.00  1.0000
  -1  -7   1   34443    1511                                                       24918  -53.60    0.00  1.0000
  -1  -7   1   30396    1512                                                       21495  -53.60    0.00  1.0000
   0   8  -1   21249    1618                                                       25705   28.13    0.00  1.0000
   0   8  -1   24738    1619                                                       29529   28.13    0.00  1.0000
   0   8  -1   21161    1616                                                       25608   28.13    0.00  1.0000
   0  -8   1   21468    1617                                                       25946   28.13    0.00  1.0000
   0  -8   1   19210    1615                                                       23457   28.13    0.00  1.0000
  -1   9  -1       5      26                                                         275  -27.56    0.00  1.0000
  -1   9  -1      16      20                                                         334  -27.56    0.00  1.0000
  -1   9  -1       5      29                                                         273  -27.56    0.00  1.0000
  -1   9  -1       2      21                                                         244  -27.56    0.00  1.0000
   1  -9   1      16      25                                                         335  -27.56    0.00  1.0000
  -2  10  -1     511     109                                                        1547   32.33    0.00  1.0000
  -2  10  -1     588     102                                                        1680   32.33    0.00  1.0000
  -2  10  -1     513     103                                                        1550   32.33    0.00  1.0000
  -2  10  -1     419     107                                                        1384   32.33    0.00  1.0000
   2 -10   1     686     106                                                        1843   32.33    0.00  1.0000
  -3  11  -1    3378     167                                                        2404  -17.58    0.00  1.0000
  -3  11  -1    3598     161                                                        2590  -17.58    0.00  1.0000
  -3  11  -1    3470     162                                                        2482  -17.58    0.00  1.0000
  -3  11  -1    3226     167                                                        2276  -17.58    0.00  1.0000
   3 -11   1    3444     160                                                        2460  -17.58    0.00  1.0000
   3 -11   1    3775     165                                                        2741  -17.58    0.00  1.0000
   3 -11   1    3798     159                                                        2760  -17.58    0.00  1.0000
  -4  12  -1    4740     446                                                        6027   16.99    0.00  1.0000
  -4  12  -1    5483     440                                                        6862   16.99    0.00  1.0000
  -4  12  -1    5702     439                                                        7107   16.99    0.00  1.0000
  -4  12  -1    5475     444                                                        6853   16.99    0.00  1.0000
   4 -12   1    5995     443                                                        7433   16.99    0.00  1.0000
   4 -12   1    5784     438                                                        7198   16.99    0.00  1.0000
   4 -12   1    6083     437                                                        7531   16.99    0.00  1.0000
  -5  13  -1       2      14                                                          25  -11.91    0.00  1.0000
  -5  13  -1       1      13                                                          30  -11.91    0.00  1.0000
  -5  13  -1       2      10                                                          25  -11.91    0.00  1.0000
  -5  13  -1       2       9                                                          23  -11.91    0.00  1.0000
   5 -13   1       2      12                                                          24  -11.91    0.00  1.0000
   5 -13   1       2       8                                                          25  -11.91    0.00  1.0000
   5 -13   1       5       6                                                          16  -11.91    0.00  1.0000
  -6  14  -1       0      10                                                          21    8.84    0.00  1.0000
  -6  14  -1       3      11                                                          39    8.84    0.00  1.0000
  -6  14  -1       0      15                                                          24    8.84    0.00  1.0000
   6 -14   1       0      15                                                          26    8.84    0.00  1.0000
   6 -14   1       0       8                                                          21    8.84    0.00  1.0000
   6 -14   1       0       9                                                          21    8.84    0.00  1.0000
  -7  15  -1    1717     107                                                        1603   -2.71    0.00  1.0000
  -7  15  -1    1698     111                                                        1584   -2.71    0.00  1.0000
  -7  15  -1    1710     107                                                        1596   -2.71    0.00  1.0000
   7 -15   1    1705     112                                                        1591   -2.71    0.00  1.0000
   7 -15   1    1592     102                                                        1482   -2.71    0.00  1.0000
  -8  16  -1    1070      80                                                        1148    2.26    0.00  1.0000
  -8  16  -1    1004      79                                                        1079    2.26    0.00  1.0000
   8 -16   1    1120      88                                                        1200    2.26    0.00  1.0000
   8 -16   1    1002      74                                                        1077    2.26    0.00  1.0000
   8 -16   1     949      74                                                        1022    2.26    0.00  1.0000
  -9  17  -1       0      17                                                          -5    0.64    0.00  1.0000
  -9  17  -1       0      15                                                         -19    0.64    0.00  1.0000
   9 -17   1       0      12                                                         -17    0.64    0.00  1.0000
   9 -17   1       3      24                                                           4    0.64    0.00  1.0000
   9 -17   1      17      13                                                          20    0.64    0.00  1.0000
  15  -9  -1     173      37                                                         163    0.78    0.00  1.0000
  15  -9  -1     179      40                                                         168    0.78    0.00  1.0000
 -15   9   1     162      26                                                         152    0.78    0.00  1.0000
 -15   9   1      93      38                                                          85    0.78    0.00  1.0000
  14  -8  -1     129      36                                                         137    0.67    0.00  1.0000
  14  -8  -1     132      30                                                         140    0.67    0.00  1.0000
 -14   8   1     194      37                                                         204    0.67    0.00  1.0000
  13  -7  -1    2602     166                                                        2563   -0.74    0.00  1.0000
  13  -7  -1    2103     166                                                        2068   -0.74    0.00  1.0000
  13  -7  -1    2672     173                                                        2633   -0.74    0.00  1.0000
  13  -7  -1    2601     159                                                        2562   -0.74    0.00  1.0000
 -13   7   1    2175     168                                                        2139   -0.74    0.00  1.0000
 -13   7   1    2476     165                                                        2438   -0.74    0.00  1.0000
  12  -6  -1    2375     140                                                        2329   -0.91    0.00  1.0000
  12  -6  -1    2436     146                                                        2390   -0.91    0.00  1.0000
  12  -6  -1    2024     146                                                        1982   -0.91    0.00  1.0000
  12  -6  -1    1980     158                                                        1938   -0.91    0.00  1.0000
 -12   6   1    1897     158                                                        1856   -0.91    0.00  1.0000
 -12   6   1    1975     148                                                        1933   -0.91    0.00  1.0000
  11  -5  -1      29      18                                                          35   -1.11    0.00  1.0000
  11  -5  -1      10      13                                                          14   -1.11    0.00  1.0000
  11  -5  -1      36      13                                                          43   -1.11    0.00  1.0000
  11  -5  -1      20      15                                                          26   -1.11    0.00  1.0000
 -11   5   1      33      16                                                          40   -1.11    0.00  1.0000
 -11   5   1      41      13                                                          49   -1.11    0.00  1.0000
  10  -4  -1       8      10                                                           3    2.21    0.00  1.0000
  10  -4  -1      17      11                                                           9    2.21    0.00  1.0000
  10  -4  -1      10      13                                                           4    2.21    0.00  1.0000
 -10   4   1       7      11                                                           2    2.21    0.00  1.0000
 -10   4   1       1       8                                                          -5    2.21    0.00  1.0000
   9  -3  -1    4756     319                                                        4956    2.78    0.00  1.0000
   9  -3  -1    4829     319                                                        5031    2.78    0.00  1.0000
   9  -3  -1    4914     317                                                        5118    2.78    0.00  1.0000
  -9   3   1    4416     318                                                        4609    2.78    0.00  1.0000
  -9   3   1    4829     316                                                        5031    2.78    0.00  1.0000
   8  -2  -1    8559     513                                                        8538   -0.22    0.00  1.0000
   8  -2  -1    7731     513                                                        7711   -0.22    0.00  1.0000
   8  -2  -1    7880     514                                                        7860   -0.22    0.00  1.0000
  -8   2   1    8032     514                                                        8012   -0.22    0.00  1.0000
  -8   2   1    8560     513                                                        8539   -0.22    0.00  1.0000
   7  -1  -1    3680     300                                                        4401   10.97    0.00  1.0000
   7  -1  -1    4128     299                                                        4890   10.97    0.00  1.0000
  -7   1   1    4176     299                                                        4942   10.97    0.00  1.0000
  -7   1   1    3868     300                                                        4607   10.97    0.00  1.0000
   5   1  -1    9718     726                                                       11559   17.26    0.00  1.0000
   5   1  -1    9910     726                                                       11768   17.26    0.00  1.0000
  -5  -1   1    9732     726                                                       11574   17.26    0.00  1.0000
   4   2  -1     108       4                                                          10  -14.63    0.00  1.0000
   4   2  -1     135       5                                                          20  -14.63    0.00  1.0000
  -4  -2   1     108       4                                                          10  -14.63    0.00  1.0000
  -4  -2   1     105       4                                                           9  -14.63    0.00  1.0000
   3   3  -1      32      58                                                         901   68.27    0.00  1.0000
   3   3  -1      36      58                                                         884   68.27    0.00  1.0000
  -3  -3   1      31      58                                                         909   68.27    0.00  1.0000
  -3  -3   1      48      58                                                         824   68.27    0.00  1.0000
   2   4  -1     760      50                                                         826    2.28    0.00  1.0000
   2   4  -1     705      50                                                         769    2.28    0.00  1.0000
  -2  -4   1     628      50                                                         689    2.28    0.00  1.0000
   1   5  -1    5929     592                                                        9285   37.40    0.00  1.0000
   1   5  -1    6977     594                                                       10586   37.40    0.00  1.0000
   1   5  -1    6132     593                                                        9538   37.40    0.00  1.0000
  -1  -5   1    5528     591                                                        8781   37.40    0.00  1.0000
  -1  -5   1    6030     591                                                        9411   37.40    0.00  1.0000
   0   6  -1    5946     385                                                        6125    2.23    0.00  1.0000
   0   6  -1    5211     387                                                        5379    2.23    0.00  1.0000
   0   6  -1    6845     385                                                        7037    2.23    0.00  1.0000
   0  -6   1    6938     387                                                        7132    2.23    0.00  1.0000
   0  -6   1    5147     385                                                        5314    2.23    0.00  1.0000
  -1   7  -1      14       6                                                          38   18.88    0.00  1.0000
  -1   7  -1      11       9                                                          45   18.88    0.00  1.0000
  -1   7  -1      11       6                                                          45   18.88    0.00  1.0000
   1  -7   1      15       6                                                          37   18.88    0.00  1.0000
   1  -7   1       9       5                                                          50   18.88    0.00  1.0000
   1  -7   1      12       7                                                          43   18.88    0.00  1.0000
  -2   8  -1   10518     793                                                       12628  -18.97    0.00  1.0000
  -2   8  -1   10586     797                                                       12702  -18.97    0.00  1.0000
  -2   8  -1   11248     793                                                       13426  -18.97    0.00  1.0000
  -2   8  -1    9367     796                                                       11364  -18.97    0.00  1.0000
   2  -8   1   11113     792                                                       13279  -18.97    0.00  1.0000
   2  -8   1   11217     795                                                       13393  -18.97    0.00  1.0000
   2  -8   1   10342     793                                                       12435  -18.97    0.00  1.0000
  -3   9  -1     261      20                                                         171    5.99    0.00  1.0000
  -3   9  -1     270      17                                                         178    5.99    0.00  1.0000
  -3   9  -1     240      21                                                         154    5.99    0.00  1.0000
  -3   9  -1     327      19                                                         225    5.99    0.00  1.0000
   3  -9   1     295      17                                                         198    5.99    0.00  1.0000
   3  -9   1     301      20                                                         203    5.99    0.00  1.0000
   3  -9   1     278      15                                                         184    5.99    0.00  1.0000
  -4  10  -1    2170     139                                                        1770   -8.72    0.00  1.0000
  -4  10  -1    2519     137                                                        2086   -8.72    0.00  1.0000
  -4  10  -1    2519     135                                                        2086   -8.72    0.00  1.0000
  -4  10  -1    2582     135                                                        2144   -8.72    0.00  1.0000
   4 -10   1    2580     133                                                        2142   -8.72    0.00  1.0000
   4 -10   1    2491     134                                                        2061   -8.72    0.00  1.0000
   4 -10   1    2655     137                                                        2210   -8.72    0.00  1.0000
  -5  11  -1     718      59                                                         797    2.78    0.00  1.0000
  -5  11  -1     760      61                                                         841    2.78    0.00  1.0000
  -5  11  -1     784      60                                                         867    2.78    0.00  1.0000
  -5  11  -1     675      64                                                         752    2.78    0.00  1.0000
   5 -11   1     735      57                                                         815    2.78    0.00  1.0000
   5 -11   1     783      58                                                         866    2.78    0.00  1.0000
   5 -11   1     751      62                                                         832    2.78    0.00  1.0000
  -6  12  -1    2261     141                                                        2192    1.41    0.00  1.0000
  -6  12  -1    2127     140                                                        2060    1.41    0.00  1.0000
  -6  12  -1    2155     140                                                        2088    1.41    0.00  1.0000
   6 -12   1    2217     143                                                        2149    1.41    0.00  1.0000
   6 -12   1    2152     138                                                        2085    1.41    0.00  1.0000
  -7  13  -1    1509     123                                                        1707   -4.79    0.00  1.0000
  -7  13  -1    1678     124                                                        1887   -4.79    0.00  1.0000
   7 -13   1    1608     120                                                        1813   -4.79    0.00  1.0000
   7 -13   1    1568     120                                                        1770   -4.79    0.00  1.0000
   7 -13   1    1707     127                                                        1918   -4.79    0.00  1.0000
  -8  14  -1      35      12                                                          25    1.81    0.00  1.0000
  -8  14  -1       1      15                                                         -18    1.81    0.00  1.0000
   8 -14   1      13      13                                                           7    1.81    0.00  1.0000
   8 -14   1       1      15                                                         -21    1.81    0.00  1.0000
   8 -14   1       7      12                                                           3    1.81    0.00  1.0000
  -9  15  -1       6      17                                                          15   -2.64    0.00  1.0000
  -9  15  -1      52      18                                                          74   -2.64    0.00  1.0000
   9 -15   1      52      16                                                          74   -2.64    0.00  1.0000
   9 -15   1       7      16                                                          16   -2.64    0.00  1.0000
   9 -15   1      26      23                                                          42   -2.64    0.00  1.0000
 -10  16  -1     487      55                                                         483    0.20    0.00  1.0000
 -10  16  -1     585      52                                                         580    0.20    0.00  1.0000
  10 -16   1     575      63                                                         570    0.20    0.00  1.0000
  10 -16   1     483      47                                                         479    0.20    0.00  1.0000
  10 -16   1     553      48                                                         548    0.20    0.00  1.0000
  14 -10  -1       0      27                                                           0   -0.40    0.00  1.0000
  14 -10  -1      19      30                                                          21   -0.40    0.00  1.0000
  14 -10  -1       0      24                                                         -49   -0.40    0.00  1.0000
 -14  10   1      15      29                                                          17   -0.40    0.00  1.0000
 -14  10   1      32      17                                                          34   -0.40    0.00  1.0000
  13  -9  -1     121      27                                                         103   -1.61    0.00  1.0000
  13  -9  -1     127      20                                                         109   -1.61    0.00  1.0000
  13  -9  -1     155      30                                                         135   -1.61    0.00  1.0000
 -13   9   1     138      28                                                         119   -1.61    0.00  1.0000
 -13   9   1     210      29                                                         187   -1.61    0.00  1.0000
  12  -8  -1    2955     212                                                        3187    4.04    0.00  1.0000
  12  -8  -1    3015     202                                                        3249    4.04    0.00  1.0000
  12  -8  -1    3083     208                                                        3320    4.04    0.00  1.0000
 -12   8   1    2874     207                                                        3103    4.04    0.00  1.0000
 -12   8   1    2489     209                                                        2702    4.04    0.00  1.0000
  11  -7  -1    2503     140                                                        2306   -3.88    0.00  1.0000
  11  -7  -1    2433     144                                                        2239   -3.88    0.00  1.0000
  11  -7  -1    2433     149                                                        2239   -3.88    0.00  1.0000
  11  -7  -1    2001     144                                                        1826   -3.88    0.00  1.0000
 -11   7   1    2314     143                                                        2125   -3.88    0.00  1.0000
 -11   7   1    2070     145                                                        1891   -3.88    0.00  1.0000
  10  -6  -1    1856     104                                                        1520    7.90    0.00  1.0000
  10  -6  -1    1469     104                                                        1172    7.90    0.00  1.0000
  10  -6  -1    1893      98                                                        1554    7.90    0.00  1.0000
  10  -6  -1    1838     100                                                        1504    7.90    0.00  1.0000
 -10   6   1    1835     100                                                        1501    7.90    0.00  1.0000
 -10   6   1    1615     102                                                        1303    7.90    0.00  1.0000
   9  -5  -1     622      80                                                        1012  -13.30    0.00  1.0000
   9  -5  -1     732      82                                                        1152  -13.30    0.00  1.0000
   9  -5  -1     727      79                                                        1145  -13.30    0.00  1.0000
   9  -5  -1     751      77                                                        1176  -13.30    0.00  1.0000
  -9   5   1     618      80                                                        1008  -13.30    0.00  1.0000
  -9   5   1     732      79                                                        1152  -13.30    0.00  1.0000
   8  -4  -1    2543     209                                                        3000    8.40    0.00  1.0000
   8  -4  -1    2838     210                                                        3320    8.40    0.00  1.0000
   8  -4  -1    2946     209                                                        3437    8.40    0.00  1.0000
  -8   4   1    2630     210                                                        3095    8.40    0.00  1.0000
  -8   4   1    2784     208                                                        3262    8.40    0.00  1.0000
   7  -3  -1    2811     152                                                        2193  -11.96    0.00  1.0000
   7  -3  -1    3168     152                                                        2510  -11.96    0.00  1.0000
   7  -3  -1    2897     153                                                        2269  -11.96    0.00  1.0000
  -7   3   1    2877     153                                                        2251  -11.96    0.00  1.0000
  -7   3   1    3044     152                                                        2399  -11.96    0.00  1.0000
   6  -2  -1    3255     218                                                        3198    0.98    0.00  1.0000
   6  -2  -1    3626     218                                                        3565    0.98    0.00  1.0000
  -6   2   1    3588     218                                                        3528    0.98    0.00  1.0000
  -6   2   1    3438     219                                                        3379    0.98    0.00  1.0000
   5  -1  -1   10661     729                                                       12585  -17.26    0.00  1.0000
   5  -1  -1    9841     729                                                       11693  -17.26    0.00  1.0000
   5  -1  -1    8920     729                                                       10687  -17.26    0.00  1.0000
  -5   1   1    9700     729                                                       11539  -17.26    0.00  1.0000
  -5   1   1   10053     729                                                       11924  -17.26    0.00  1.0000
   3   1  -1      29      26                                                         348  -25.71    0.00  1.0000
  -3  -1   1      34      25                                                         366  -25.71    0.00  1.0000
   2   2  -1    2687     340                                                        5422  -42.14    0.00  1.0000
   2   2  -1    3107     340                                                        6012  -42.14    0.00  1.0000
  -2  -2   1    2657     340                                                        5379  -42.14    0.00  1.0000
  -2  -2   1    2421     341                                                        5041  -42.14    0.00  1.0000
   1   3  -1    3800     497                                                        7389  -47.04    0.00  1.0000
   1   3  -1    4184     496                                                        7920  -47.04    0.00  1.0000
  -1  -3   1    4698     499                                                        8623  -47.04    0.00  1.0000
   0   4  -1   14489     890                                                       12710   14.75    0.00  1.0000
   0   4  -1   17673     889                                                       15702   14.75    0.00  1.0000
   0   4  -1   16143     893                                                       14262   14.75    0.00  1.0000
   0  -4   1   16912     892                                                       14985   14.75    0.00  1.0000
   0  -4   1   15568     887                                                       13722   14.75    0.00  1.0000
  -1   5  -1    2562     374                                                        6437  -57.22    0.00  1.0000
  -1   5  -1    2301     374                                                        6019  -57.22    0.00  1.0000
  -1   5  -1    1884     375                                                        5332  -57.22    0.00  1.0000
   1  -5   1    2491     373                                                        6325  -57.22    0.00  1.0000
   1  -5   1    2189     374                                                        5838  -57.22    0.00  1.0000
   1  -5   1    2285     375                                                        5994  -57.22    0.00  1.0000
  -2   6  -1     730       7                                                          41   39.94    0.00  1.0000
  -2   6  -1     726       7                                                          40   39.94    0.00  1.0000
  -2   6  -1     735       8                                                          42   39.94    0.00  1.0000
  -2   6  -1     743       8                                                          44   39.94    0.00  1.0000
   2  -6   1     759       9                                                          48   39.94    0.00  1.0000
   2  -6   1     704       6                                                          35   39.94    0.00  1.0000
   2  -6   1     730       6                                                          41   39.94    0.00  1.0000
  -3   7  -1   15181    1094                                                       19003  -28.30    0.00  1.0000
  -3   7  -1   14774    1094                                                       18548  -28.30    0.00  1.0000
  -3   7  -1   11592    1095                                                       14959  -28.30    0.00  1.0000
  -3   7  -1   13964    1094                                                       17639  -28.30    0.00  1.0000
   3  -7   1   13789    1095                                                       17442  -28.30    0.00  1.0000
   3  -7   1   14158    1093                                                       17857  -28.30    0.00  1.0000
   3  -7   1   13948    1093                                                       17621  -28.30    0.00  1.0000
  -4   8  -1   15569     703                                                       12134   28.26    0.00  1.0000
  -4   8  -1   15345     702                                                       11936   28.26    0.00  1.0000
  -4   8  -1   14515     702                                                       11206   28.26    0.00  1.0000
  -4   8  -1   12771     704                                                        9680   28.26    0.00  1.0000
   4  -8   1   14852     701                                                       11502   28.26    0.00  1.0000
   4  -8   1   14313     704                                                       11028   28.26    0.00  1.0000
   4  -8   1   14483     702                                                       11178   28.26    0.00  1.0000
  -5   9  -1     252      44                                                         604  -16.81    0.00  1.0000
  -5   9  -1     227      42                                                         565  -16.81    0.00  1.0000
  -5   9  -1     238      43                                                         582  -16.81    0.00  1.0000
   5  -9   1     218      41                                                         551  -16.81    0.00  1.0000
   5  -9   1     220      43                                                         554  -16.81    0.00  1.0000
   5  -9   1     222      46                                                         557  -16.81    0.00  1.0000
  -6  10  -1    1068      55                                                         750   10.23    0.00  1.0000
  -6  10  -1    1021      53                                                         711   10.23    0.00  1.0000
   6 -10   1     998      57                                                         692   10.23    0.00  1.0000
   6 -10   1    1030      52                                                         718   10.23    0.00  1.0000
   6 -10   1    1028      53                                                         717   10.23    0.00  1.0000
  -7  11  -1    2912     221                                                        3358   -7.70    0.00  1.0000
  -7  11  -1    3012     222                                                        3465   -7.70    0.00  1.0000
   7 -11   1    3057     224                                                        3513   -7.70    0.00  1.0000
   7 -11   1    2891     219                                                        3335   -7.70    0.00  1.0000
   7 -11   1    2888     219                                                        3332   -7.70    0.00  1.0000
  -8  12  -1    1674      97                                                        1350    8.09    0.00  1.0000
  -8  12  -1    1719      98                                                        1390    8.09    0.00  1.0000
   8 -12   1    1682      99                                                        1357    8.09    0.00  1.0000
   8 -12   1    1642      94                                                        1321    8.09    0.00  1.0000
  -9  13  -1       7      14                                                          20   -3.37    0.00  1.0000
  -9  13  -1      20      19                                                          39   -3.37    0.00  1.0000
   9 -13   1      16      15                                                          33   -3.37    0.00  1.0000
   9 -13   1      20      14                                                          38   -3.37    0.00  1.0000
   9 -13   1       5      18                                                          16   -3.37    0.00  1.0000
 -10  14  -1       6      20                                                          18    3.30    0.00  1.0000
 -10  14  -1       3      16                                                          11    3.30    0.00  1.0000
  10 -14   1       3      23                                                         -18    3.30    0.00  1.0000
  10 -14   1       3      18                                                         -12    3.30    0.00  1.0000
  10 -14   1       2      18                                                           9    3.30    0.00  1.0000
 -11  15  -1     704      60                                                         728   -0.88    0.00  1.0000
 -11  15  -1     606      67                                                         629   -0.88    0.00  1.0000
  11 -15   1     611      61                                                         634   -0.88    0.00  1.0000
  11 -15   1     566      69                                                         588   -0.88    0.00  1.0000
  11 -15   1     536      58                                                         557   -0.88    0.00  1.0000
  14 -12  -1     260      46                                                         270   -0.61    0.00  1.0000
  14 -12  -1     323      49                                                         334   -0.61    0.00  1.0000
 -14  12   1     307      41                                                         318   -0.61    0.00  1.0000
 -14  12   1     262      48                                                         272   -0.61    0.00  1.0000
  13 -11  -1    1372      93                                                        1284    2.33    0.00  1.0000
  13 -11  -1    1131      95                                                        1052    2.33    0.00  1.0000
  13 -11  -1    1522     101                                                        1430    2.33    0.00  1.0000
 -13  11   1    1374      92                                                        1286    2.33    0.00  1.0000
 -13  11   1    1210      99                                                        1128    2.33    0.00  1.0000
  12 -10  -1    1134      95                                                        1231   -2.74    0.00  1.0000
 -12  10   1    1131      88                                                        1228   -2.74    0.00  1.0000
 -12  10   1    1027      94                                                        1120   -2.74    0.00  1.0000
  11  -9  -1     174      31                                                         190    1.18    0.00  1.0000
  11  -9  -1     172      26                                                         188    1.18    0.00  1.0000
 -11   9   1     179      27                                                         196    1.18    0.00  1.0000
 -11   9   1     151      29                                                         166    1.18    0.00  1.0000
  10  -8  -1      55      20                                                          75   -2.43    0.00  1.0000
  10  -8  -1      46      15                                                          64   -2.43    0.00  1.0000
  10  -8  -1      55      15                                                          75   -2.43    0.00  1.0000
 -10   8   1      57      18                                                          78   -2.43    0.00  1.0000
 -10   8   1      46      14                                                          64   -2.43    0.00  1.0000
   9  -7  -1    6461     373                                                        6578   -1.40    0.00  1.0000
   9  -7  -1    5495     376                                                        5603   -1.40    0.00  1.0000
   9  -7  -1    5229     375                                                        5334   -1.40    0.00  1.0000
   9  -7  -1    6008     377                                                        6120   -1.40    0.00  1.0000
  -9   7   1    5902     374                                                        6013   -1.40    0.00  1.0000
  -9   7   1    5516     376                                                        5624   -1.40    0.00  1.0000
   8  -6  -1    1628      88                                                        1178   11.66    0.00  1.0000
   8  -6  -1    1738      90                                                        1272   11.66    0.00  1.0000
   8  -6  -1    1913      87                                                        1422   11.66    0.00  1.0000
  -8   6   1    1650      88                                                        1197   11.66    0.00  1.0000
  -8   6   1    1717      87                                                        1254   11.66    0.00  1.0000
   7  -5  -1      90       7                                                          18  -10.12    0.00  1.0000
   7  -5  -1      92       9                                                          19  -10.12    0.00  1.0000
   7  -5  -1     111       8                                                          28  -10.12    0.00  1.0000
  -7   5   1     107      10                                                          26  -10.12    0.00  1.0000
  -7   5   1      90       7                                                          18  -10.12    0.00  1.0000
   6  -4  -1     645      28                                                         302   15.51    0.00  1.0000
   6  -4  -1     690      30                                                         333   15.51    0.00  1.0000
   6  -4  -1     767      27                                                         387   15.51    0.00  1.0000
   6  -4  -1     634      27                                                         294   15.51    0.00  1.0000
  -6   4   1     684      26                                                         329   15.51    0.00  1.0000
  -6   4   1     644      27                                                         301   15.51    0.00  1.0000
   5  -3  -1   16519    1009                                                       16662   -1.07    0.00  1.0000
   5  -3  -1   15878    1010                                                       16018   -1.07    0.00  1.0000
   5  -3  -1   16410    1009                                                       16552   -1.07    0.00  1.0000
  -5   3   1   16421    1009                                                       16563   -1.07    0.00  1.0000
  -5   3   1   13989    1008                                                       14120   -1.07    0.00  1.0000
  -5   3   1   17118    1008                                                       17263   -1.07    0.00  1.0000
   4  -2  -1     117       5                                                          13   14.63    0.00  1.0000
   4  -2  -1     111       4                                                          11   14.63    0.00  1.0000
   4  -2  -1     123       6                                                          15   14.63    0.00  1.0000
  -4   2   1     108       4                                                          10   14.63    0.00  1.0000
  -4   2   1     105       4                                                           9   14.63    0.00  1.0000
  -4   2   1     133       5                                                          19   14.63    0.00  1.0000
   3  -1  -1      32      24                                                         357   25.71    0.00  1.0000
   3  -1  -1      28      25                                                         346   25.71    0.00  1.0000
   3  -1  -1      28      24                                                         345   25.71    0.00  1.0000
  -3   1   1      13      24                                                         285   25.71    0.00  1.0000
  -3   1   1      29      24                                                         348   25.71    0.00  1.0000
   0   2  -1   21477    1558                                                       26891  -33.70    0.00  1.0000
   0   2  -1   20432    1557                                                       25721  -33.70    0.00  1.0000
   0  -2   1   16427    1556                                                       21200  -33.70    0.00  1.0000
   0  -2   1   20940    1557                                                       26290  -33.70    0.00  1.0000
  -1   3  -1    3602      41                                                         626   67.62    0.00  1.0000
  -1   3  -1    3614      41                                                         631   67.62    0.00  1.0000
   1  -3   1    3436      41                                                         558   67.62    0.00  1.0000
   1  -3   1    3616      41                                                         632   67.62    0.00  1.0000
  -2   4  -1    1276      32                                                         505  -25.61    0.00  1.0000
  -2   4  -1    1290      34                                                         514  -25.61    0.00  1.0000
  -2   4  -1    1210      33                                                         464  -25.61    0.00  1.0000
   2  -4   1    1152      34                                                         428  -25.61    0.00  1.0000
   2  -4   1    1204      33                                                         460  -25.61    0.00  1.0000
  -3   5  -1     244      55                                                         759   23.04    0.00  1.0000
  -3   5  -1     277      55                                                         815   23.04    0.00  1.0000
  -3   5  -1     301      53                                                         857   23.04    0.00  1.0000
   3  -5   1     271      54                                                         805   23.04    0.00  1.0000
   3  -5   1     245      56                                                         760   23.04    0.00  1.0000
  -4   6  -1    5913     441                                                        7569  -19.53    0.00  1.0000
  -4   6  -1    5419     444                                                        7009  -19.53    0.00  1.0000
  -4   6  -1    5342     444                                                        6921  -19.53    0.00  1.0000
   4  -6   1    5349     445                                                        6929  -19.53    0.00  1.0000
   4  -6   1    5314     443                                                        6889  -19.53    0.00  1.0000
  -5   7  -1    2916     169                                                        2572    6.34    0.00  1.0000
  -5   7  -1    3079     169                                                        2726    6.34    0.00  1.0000
   5  -7   1    2811     170                                                        2474    6.34    0.00  1.0000
   5  -7   1    2970     168                                                        2623    6.34    0.00  1.0000
  -6   8  -1    4564     277                                                        4460   -1.50    0.00  1.0000
  -6   8  -1    4470     277                                                        4367   -1.50    0.00  1.0000
   6  -8   1    4337     276                                                        4235   -1.50    0.00  1.0000
   6  -8   1    4380     278                                                        4278   -1.50    0.00  1.0000
   6  -8   1    4348     276                                                        4246   -1.50    0.00  1.0000
  -7   9  -1     137      25                                                         143    0.48    0.00  1.0000
  -7   9  -1     198      23                                                         205    0.48    0.00  1.0000
   7  -9   1     143      24                                                         149    0.48    0.00  1.0000
   7  -9   1     202      22                                                         209    0.48    0.00  1.0000
   7  -9   1     188      30                                                         195    0.48    0.00  1.0000
  -8  10  -1     602      45                                                         559    1.72    0.00  1.0000
  -8  10  -1     524      46                                                         484    1.72    0.00  1.0000
   8 -10   1     537      50                                                         497    1.72    0.00  1.0000
   8 -10   1     574      44                                                         532    1.72    0.00  1.0000
   8 -10   1     539      43                                                         498    1.72    0.00  1.0000
  -9  11  -1     149      36                                                         231   -5.79    0.00  1.0000
  -9  11  -1     221      34                                                         319   -5.79    0.00  1.0000
   9 -11   1     189      42                                                         280   -5.79    0.00  1.0000
   9 -11   1     234      36                                                         335   -5.79    0.00  1.0000
 -10  12  -1    1244      99                                                        1345    2.71    0.00  1.0000
 -10  12  -1    1152     102                                                        1249    2.71    0.00  1.0000
  10 -12   1    1203      98                                                        1302    2.71    0.00  1.0000
  10 -12   1    1309      99                                                        1412    2.71    0.00  1.0000
  10 -12   1    1391     107                                                        1498    2.71    0.00  1.0000
 -11  13  -1    1084      76                                                         989   -2.86    0.00  1.0000
 -11  13  -1     855     107                                                         771   -2.86    0.00  1.0000
  11 -13   1     913      73                                                         826   -2.86    0.00  1.0000
  11 -13   1    1109      76                                                        1013   -2.86    0.00  1.0000
  11 -13   1     995      84                                                         904   -2.86    0.00  1.0000
  13 -13  -1    1328      97                                                        1354   -0.69    0.00  1.0000
  13 -13  -1    1273     104                                                        1298   -0.69    0.00  1.0000
  13 -13  -1    1219     100                                                        1244   -0.69    0.00  1.0000
 -13  13   1    1327      96                                                        1353   -0.69    0.00  1.0000
 -13  13   1    1233     108                                                        1258   -0.69    0.00  1.0000
  12 -12  -1    4135     267                                                        4185   -0.75    0.00  1.0000
  12 -12  -1    4442     275                                                        4494   -0.75    0.00  1.0000
  12 -12  -1    3583     269                                                        3630   -0.75    0.00  1.0000
 -12  12   1    4158     269                                                        4208   -0.75    0.00  1.0000
  11 -11  -1     975      70                                                         889    2.74    0.00  1.0000
  11 -11  -1     814      65                                                         735    2.74    0.00  1.0000
  11 -11  -1     945      64                                                         860    2.74    0.00  1.0000
 -11  11   1     817      69                                                         738    2.74    0.00  1.0000
 -11  11   1     969      64                                                         883    2.74    0.00  1.0000
  10 -10  -1     969      65                                                         888   -2.56    0.00  1.0000
  10 -10  -1     991      65                                                         909   -2.56    0.00  1.0000
  10 -10  -1     882      76                                                         805   -2.56    0.00  1.0000
 -10  10   1     948      69                                                         868   -2.56    0.00  1.0000
 -10  10   1     920      69                                                         841   -2.56    0.00  1.0000
   9  -9  -1     398      32                                                         273    6.64    0.00  1.0000
   9  -9  -1     341      28                                                         226    6.64    0.00  1.0000
   9  -9  -1     370      27                                                         250    6.64    0.00  1.0000
   9  -9  -1     389      28                                                         265    6.64    0.00  1.0000
  -9   9   1     350      30                                                         233    6.64    0.00  1.0000
  -9   9   1     378      26                                                         256    6.64    0.00  1.0000
   8  -8  -1    6448     427                                                        7070   -7.31    0.00  1.0000
   8  -8  -1    6364     430                                                        6982   -7.31    0.00  1.0000
   8  -8  -1    6733     428                                                        7368   -7.31    0.00  1.0000
   8  -8  -1    5596     428                                                        6176   -7.31    0.00  1.0000
  -8   8   1    6345     428                                                        6962   -7.31    0.00  1.0000
  -8   8   1    5474     428                                                        6048   -7.31    0.00  1.0000
   7  -7  -1    1537     120                                                        1683   -3.51    0.00  1.0000
   7  -7  -1    1649     121                                                        1800   -3.51    0.00  1.0000
   7  -7  -1    1917     121                                                        2079   -3.51    0.00  1.0000
   7  -7  -1    1723     119                                                        1877   -3.51    0.00  1.0000
  -7   7   1    1718     120                                                        1872   -3.51    0.00  1.0000
  -7   7   1    1497     123                                                        1641   -3.51    0.00  1.0000
  -7   7   1    1555     120                                                        1701   -3.51    0.00  1.0000
   6  -6  -1    1500     106                                                        1792    6.96    0.00  1.0000
   6  -6  -1    1291     106                                                        1563    6.96    0.00  1.0000
   6  -6  -1    1237     104                                                        1503    6.96    0.00  1.0000
  -6   6   1    1199     104                                                        1461    6.96    0.00  1.0000
  -6   6   1    1316     104                                                        1590    6.96    0.00  1.0000
   5  -5  -1     374      10                                                          58  -22.67    0.00  1.0000
   5  -5  -1     408      12                                                          72  -22.67    0.00  1.0000
   5  -5  -1     334       9                                                          43  -22.67    0.00  1.0000
  -5   5   1     417      11                                                          76  -22.67    0.00  1.0000
  -5   5   1     371       9                                                          57  -22.67    0.00  1.0000
  -5   5   1     374      11                                                          58  -22.67    0.00  1.0000
   4  -4  -1     774      21                                                         250   23.26    0.00  1.0000
   4  -4  -1     816      23                                                         274   23.26    0.00  1.0000
   4  -4  -1     892      23                                                         319   23.26    0.00  1.0000
  -4   4   1     853      21                                                         296   23.26    0.00  1.0000
  -4   4   1     772      23                                                         249   23.26    0.00  1.0000
  -4   4   1     833      22                                                         284   23.26    0.00  1.0000
   3  -3  -1      32      57                                                         904  -68.27    0.00  1.0000
   3  -3  -1      41      56                                                         856  -68.27    0.00  1.0000
   3  -3  -1      61      55                                                         770  -68.27    0.00  1.0000
  -3   3   1      52      55                                                         807  -68.27    0.00  1.0000
  -3   3   1      39      55                                                         864  -68.27    0.00  1.0000
   2  -2  -1    2397     333                                                        5006   42.14    0.00  1.0000
   2  -2  -1    2922     334                                                        5753   42.14    0.00  1.0000
   2  -2  -1    2658     335                                                        5381   42.14    0.00  1.0000
  -2   2   1    2673     333                                                        5402   42.14    0.00  1.0000
  -2   2   1    2417     335                                                        5035   42.14    0.00  1.0000
  -2   2   1    2790     334                                                        5568   42.14    0.00  1.0000
  -1   1  -1      63     105                                                        1600  -62.00    0.00  1.0000
  -1   1  -1     105     106                                                        1792  -62.00    0.00  1.0000
   1  -1   1      63     105                                                        1598  -62.00    0.00  1.0000
  -2   2  -1   16042    1181                                                       19200   23.01    0.00  1.0000
  -2   2  -1   16042    1180                                                       19200   23.01    0.00  1.0000
   2  -2   1   15287    1175                                                       18373   23.01    0.00  1.0000
  -3   3  -1   10954     440                                                        7279  -37.40    0.00  1.0000
  -3   3  -1   10644     440                                                        7026  -37.40    0.00  1.0000
   3  -3   1   10513     439                                                        6920  -37.40    0.00  1.0000
   3  -3   1   10417     440                                                        6842  -37.40    0.00  1.0000
  -4   4  -1    2217     223                                                        3532   23.87    0.00  1.0000
  -4   4  -1    2353     224                                                        3703   23.87    0.00  1.0000
   4  -4   1    2127     223                                                        3418   23.87    0.00  1.0000
   4  -4   1    2081     224                                                        3360   23.87    0.00  1.0000
  -5   5  -1     119      23                                                         234   -8.48    0.00  1.0000
  -5   5  -1     143      24                                                         267   -8.48    0.00  1.0000
   5  -5   1     104      22                                                         213   -8.48    0.00  1.0000
   5  -5   1     124      25                                                         241   -8.48    0.00  1.0000
  -6   6  -1    2045     148                                                        2193    3.11    0.00  1.0000
  -6   6  -1    2191     148                                                        2344    3.11    0.00  1.0000
   6  -6   1    1951     147                                                        2096    3.11    0.00  1.0000
   6  -6   1    2155     150                                                        2307    3.11    0.00  1.0000
  -7   7  -1   12914     766                                                       12819   -0.81    0.00  1.0000
  -7   7  -1   12131     765                                                       12038   -0.81    0.00  1.0000
   7  -7   1   11201     769                                                       11112   -0.81    0.00  1.0000
   7  -7   1   12928     768                                                       12832   -0.81    0.00  1.0000
   7  -7   1   12223     765                                                       12130   -0.81    0.00  1.0000
  -8   8  -1    3654     242                                                        3478   -2.84    0.00  1.0000
  -8   8  -1    3942     242                                                        3759   -2.84    0.00  1.0000
   8  -8   1    3976     242                                                        3793   -2.84    0.00  1.0000
   8  -8   1    4028     245                                                        3843   -2.84    0.00  1.0000
  -9   9  -1      66      20                                                          93    2.93    0.00  1.0000
  -9   9  -1      37      19                                                          58    2.93    0.00  1.0000
   9  -9   1      84      23                                                         114    2.93    0.00  1.0000
 -10  10  -1     243      33                                                         283    2.37    0.00  1.0000
 -10  10  -1     176      33                                                         210    2.37    0.00  1.0000
  10 -10   1     180      34                                                         214    2.37    0.00  1.0000
 -11  11  -1    2122     151                                                        2065   -1.21    0.00  1.0000
 -11  11  -1    2175     148                                                        2117   -1.21    0.00  1.0000
  11 -11   1    2317     156                                                        2257   -1.21    0.00  1.0000
  11 -11   1    2124     148                                                        2067   -1.21    0.00  1.0000
 -12  12  -1     827      88                                                         889    2.07    0.00  1.0000
 -12  12  -1     978      83                                                        1046    2.07    0.00  1.0000
  12 -12   1     991      92                                                        1059    2.07    0.00  1.0000
  12 -12   1     965      82                                                        1032    2.07    0.00  1.0000
  12 -12   1     923      83                                                         989    2.07    0.00  1.0000
  12 -14  -1      99      23                                                          90    0.89    0.00  1.0000
  12 -14  -1      62      24                                                          55    0.89    0.00  1.0000
  12 -14  -1      87      20                                                          79    0.89    0.00  1.0000
 -12  14   1      69      26                                                          62    0.89    0.00  1.0000
 -12  14   1     108      19                                                          99    0.89    0.00  1.0000
  11 -13  -1     512      55                                                         514   -0.08    0.00  1.0000
  11 -13  -1     564      47                                                         566   -0.08    0.00  1.0000
  11 -13  -1     524      50                                                         526   -0.08    0.00  1.0000
 -11  13   1     561      47                                                         563   -0.08    0.00  1.0000
 -11  13   1     547      56                                                         549   -0.08    0.00  1.0000
  10 -12  -1    1399      91                                                        1301   -2.58    0.00  1.0000
  10 -12  -1    1434      97                                                        1335   -2.58    0.00  1.0000
 -10  12   1    1354      96                                                        1258   -2.58    0.00  1.0000
 -10  12   1    1498      93                                                        1397   -2.58    0.00  1.0000
   9 -11  -1    4435     319                                                        4622    2.68    0.00  1.0000
   9 -11  -1    4837     317                                                        5032    2.68    0.00  1.0000
   9 -11  -1    5003     322                                                        5201    2.68    0.00  1.0000
  -9  11   1    5043     319                                                        5242    2.68    0.00  1.0000
  -9  11   1    4693     321                                                        4885    2.68    0.00  1.0000
   8 -10  -1     109      11                                                          39   -8.19    0.00  1.0000
   8 -10  -1      81      10                                                          23   -8.19    0.00  1.0000
   8 -10  -1     139      15                                                          58   -8.19    0.00  1.0000
   8 -10  -1     119      13                                                          45   -8.19    0.00  1.0000
  -8  10   1      81      22                                                          23   -8.19    0.00  1.0000
  -8  10   1     120      13                                                          46   -8.19    0.00  1.0000
  -8  10   1     138      11                                                          57   -8.19    0.00  1.0000
   7  -9  -1     202      11                                                          41   15.11    0.00  1.0000
   7  -9  -1     200      12                                                          40   15.11    0.00  1.0000
   7  -9  -1     169       9                                                          27   15.11    0.00  1.0000
   7  -9  -1     209      10                                                          44   15.11    0.00  1.0000
  -7   9   1     154      10                                                          21   15.11    0.00  1.0000
  -7   9   1     193      11                                                          37   15.11    0.00  1.0000
  -7   9   1     228      10                                                          53   15.11    0.00  1.0000
   6  -8  -1     499      22                                                         246  -12.86    0.00  1.0000
   6  -8  -1     541      25                                                         276  -12.86    0.00  1.0000
   6  -8  -1     558      26                                                         288  -12.86    0.00  1.0000
   6  -8  -1     480      22                                                         233  -12.86    0.00  1.0000
  -6   8   1     509      24                                                         253  -12.86    0.00  1.0000
  -6   8   1     466      27                                                         223  -12.86    0.00  1.0000
  -6   8   1     533      22                                                         270  -12.86    0.00  1.0000
   5  -7  -1   10126     761                                                       12342   20.23    0.00  1.0000
   5  -7  -1   10430     765                                                       12677   20.23    0.00  1.0000
   5  -7  -1   10688     766                                                       12962   20.23    0.00  1.0000
   5  -7  -1    9275     762                                                       11400   20.23    0.00  1.0000
  -5   7   1    9778     763                                                       11957   20.23    0.00  1.0000
  -5   7   1   10553     765                                                       12813   20.23    0.00  1.0000
  -5   7   1   10076     762                                                       12287   20.23    0.00  1.0000
  -5   7   1    9331     767                                                       11462   20.23    0.00  1.0000
   4  -6  -1    3166     127                                                        2097  -20.25    0.00  1.0000
   4  -6  -1    3129     130                                                        2067  -20.25    0.00  1.0000
   4  -6  -1    3137     131                                                        2074  -20.25    0.00  1.0000
   4  -6  -1    2825     128                                                        1822  -20.25    0.00  1.0000
  -4   6   1    3031     128                                                        1988  -20.25    0.00  1.0000
  -4   6   1    2989     132                                                        1954  -20.25    0.00  1.0000
  -4   6   1    3135     131                                                        2072  -20.25    0.00  1.0000
  -4   6   1    3055     128                                                        2007  -20.25    0.00  1.0000
   3  -5  -1     562     151                                                        2060   41.89    0.00  1.0000
   3  -5  -1     832     151                                                        2553   41.89    0.00  1.0000
   3  -5  -1     970     154                                                        2791   41.89    0.00  1.0000
   3  -5  -1     765     155                                                        2435   41.89    0.00  1.0000
  -3   5   1     742     155                                                        2394   41.89    0.00  1.0000
  -3   5   1     720     151                                                        2353   41.89    0.00  1.0000
  -3   5   1     681     151                                                        2283   41.89    0.00  1.0000
   2  -4  -1     603      47                                                         662   -2.28    0.00  1.0000
  -2   4   1     584      47                                                         642   -2.28    0.00  1.0000
  -2   4   1     636      44                                                         697   -2.28    0.00  1.0000
  -2   4   1     659      44                                                         721   -2.28    0.00  1.0000
   1  -3  -1    2933     458                                                        6157   47.04    0.00  1.0000
  -1   3   1    4609     455                                                        8502   47.04    0.00  1.0000
   0  -2  -1   18566    1479                                                       23621   33.70    0.00  1.0000
   0   2   1   19083    1481                                                       24204   33.70    0.00  1.0000
   0   2   1   17771    1484                                                       22724   33.70    0.00  1.0000
   0   2   1   19492    1480                                                       24664   33.70    0.00  1.0000
  -1  -1  -1      61     104                                                        1588   62.00    0.00  1.0000
   1   1   1      84     103                                                        1701   62.00    0.00  1.0000
   1   1   1      83     104                                                        1697   62.00    0.00  1.0000
   1   1   1      47     103                                                        1517   62.00    0.00  1.0000
  -3   1  -1   67550    4710                                                       70073    9.29    0.00  1.0000
  -3   1  -1   75681    4714                                                       78350    9.29    0.00  1.0000
   3  -1   1   76313    4712                                                       78993    9.29    0.00  1.0000
   3  -1   1   72718    4714                                                       75335    9.29    0.00  1.0000
  -4   2  -1   24703    1769                                                       27480   16.61    0.00  1.0000
  -4   2  -1   26880    1774                                                       29773   16.61    0.00  1.0000
   4  -2   1   26293    1765                                                       29155   16.61    0.00  1.0000
   4  -2   1   24421    1768                                                       27182   16.61    0.00  1.0000
  -5   3  -1    1499      57                                                         766  -21.33    0.00  1.0000
  -5   3  -1    1556      58                                                         807  -21.33    0.00  1.0000
   5  -3   1    1603      58                                                         841  -21.33    0.00  1.0000
   5  -3   1    1542      58                                                         797  -21.33    0.00  1.0000
  -6   4  -1     783      33                                                         365   17.17    0.00  1.0000
  -6   4  -1     840      33                                                         404   17.17    0.00  1.0000
   6  -4   1     761      34                                                         350   17.17    0.00  1.0000
   6  -4   1     771      32                                                         357   17.17    0.00  1.0000
   6  -4   1     836      33                                                         401   17.17    0.00  1.0000
  -7   5  -1     274      19                                                         116  -11.21    0.00  1.0000
  -7   5  -1     300      18                                                         133  -11.21    0.00  1.0000
   7  -5   1     265      18                                                         110  -11.21    0.00  1.0000
   7  -5   1     209      17                                                          75  -11.21    0.00  1.0000
   7  -5   1     274      18                                                         116  -11.21    0.00  1.0000
  -8   6  -1     844      88                                                        1100    7.96    0.00  1.0000
  -8   6  -1     974      87                                                        1248    7.96    0.00  1.0000
   8  -6   1     994      91                                                        1270    7.96    0.00  1.0000
   8  -6   1     993      88                                                        1269    7.96    0.00  1.0000
   8  -6   1     931      87                                                        1199    7.96    0.00  1.0000
  -9   7  -1     313      32                                                         286   -1.49    0.00  1.0000
  -9   7  -1     310      35                                                         283   -1.49    0.00  1.0000
   9  -7   1     336      40                                                         308   -1.49    0.00  1.0000
   9  -7   1     308      33                                                         281   -1.49    0.00  1.0000
   9  -7   1     318      33                                                         291   -1.49    0.00  1.0000
 -10   8  -1    1061     114                                                        1172   -3.23    0.00  1.0000
 -10   8  -1    1160     100                                                        1276   -3.23    0.00  1.0000
  10  -8   1    1248     108                                                        1369   -3.23    0.00  1.0000
  10  -8   1    1332      99                                                        1457   -3.23    0.00  1.0000
 -11   9  -1     204      31                                                         203    0.05    0.00  1.0000
 -11   9  -1     157      31                                                         156    0.05    0.00  1.0000
  11  -9   1     167      30                                                         166    0.05    0.00  1.0000
  11  -9   1     167      33                                                         166    0.05    0.00  1.0000
 -12  10  -1     236      38                                                         221   -0.98    0.00  1.0000
 -12  10  -1     294      45                                                         277   -0.98    0.00  1.0000
  12 -10   1     341      44                                                         323   -0.98    0.00  1.0000
  12 -10   1     322      48                                                         304   -0.98    0.00  1.0000
  12 -10   1     291      44                                                         274   -0.98    0.00  1.0000
 -13  11  -1       5      20                                                           5   -0.01    0.00  1.0000
 -13  11  -1       0      27                                                         -15   -0.01    0.00  1.0000
  13 -11   1      25      26                                                          25   -0.01    0.00  1.0000
  13 -11   1       0      29                                                         -71   -0.01    0.00  1.0000
  11 -15  -1      81      18                                                          61   -2.31    0.00  1.0000
  11 -15  -1      87      23                                                          66   -2.31    0.00  1.0000
  11 -15  -1      59      15                                                          42   -2.31    0.00  1.0000
 -11  15   1      31      23                                                          19   -2.31    0.00  1.0000
 -11  15   1      24      13                                                          14   -2.31    0.00  1.0000
  10 -14  -1     406      41                                                         351    2.71    0.00  1.0000
  10 -14  -1     394      31                                                         340    2.71    0.00  1.0000
  10 -14  -1     353      34                                                         302    2.71    0.00  1.0000
 -10  14   1     373      40                                                         321    2.71    0.00  1.0000
 -10  14   1     372      32                                                         320    2.71    0.00  1.0000
   9 -13  -1    1869     128                                                        1862   -0.15    0.00  1.0000
   9 -13  -1    1835     120                                                        1828   -0.15    0.00  1.0000
  -9  13   1    1848     127                                                        1841   -0.15    0.00  1.0000
  -9  13   1    1868     123                                                        1861   -0.15    0.00  1.0000
   8 -12  -1    4655     291                                                        4706    0.72    0.00  1.0000
   8 -12  -1    4364     293                                                        4413    0.72    0.00  1.0000
   8 -12  -1    4948     298                                                        5000    0.72    0.00  1.0000
  -8  12   1    4008     302                                                        4055    0.72    0.00  1.0000
  -8  12   1    4814     293                                                        4866    0.72    0.00  1.0000
  -8  12   1    4538     295                                                        4588    0.72    0.00  1.0000
   7 -11  -1     925      71                                                        1008    2.58    0.00  1.0000
   7 -11  -1     824      66                                                         902    2.58    0.00  1.0000
   7 -11  -1     921      65                                                        1004    2.58    0.00  1.0000
  -7  11   1     834      76                                                         913    2.58    0.00  1.0000
  -7  11   1     889      69                                                         970    2.58    0.00  1.0000
  -7  11   1     917      67                                                        1000    2.58    0.00  1.0000
   6 -10  -1     268      29                                                         413   -7.67    0.00  1.0000
   6 -10  -1     266      31                                                         411   -7.67    0.00  1.0000
   6 -10  -1     274      35                                                         421   -7.67    0.00  1.0000
  -6  10   1     255      30                                                         397   -7.67    0.00  1.0000
  -6  10   1     208      37                                                         338   -7.67    0.00  1.0000
  -6  10   1     268      36                                                         414   -7.67    0.00  1.0000
  -6  10   1     234      32                                                         371   -7.67    0.00  1.0000
   5  -9  -1       2       4                                                          -2    2.38    0.00  1.0000
   5  -9  -1      14      10                                                           8    2.38    0.00  1.0000
   5  -9  -1      14       5                                                           8    2.38    0.00  1.0000
   5  -9  -1      20       8                                                          13    2.38    0.00  1.0000
  -5   9   1       6       5                                                           2    2.38    0.00  1.0000
  -5   9   1      24       7                                                          16    2.38    0.00  1.0000
  -5   9   1      18       8                                                          11    2.38    0.00  1.0000
  -5   9   1       2       7                                                          -4    2.38    0.00  1.0000
   4  -8  -1    7331     412                                                        7189   -1.61    0.00  1.0000
   4  -8  -1    6774     418                                                        6638   -1.61    0.00  1.0000
   4  -8  -1    5993     413                                                        5865   -1.61    0.00  1.0000
   4  -8  -1    7289     417                                                        7148   -1.61    0.00  1.0000
  -4   8   1    6719     413                                                        6583   -1.61    0.00  1.0000
  -4   8   1    6534     414                                                        6400   -1.61    0.00  1.0000
  -4   8   1    6501     418                                                        6367   -1.61    0.00  1.0000
  -4   8   1    6929     420                                                        6791   -1.61    0.00  1.0000
   3  -7  -1    1460      70                                                        1185   -7.32    0.00  1.0000
   3  -7  -1    1225      71                                                         974   -7.32    0.00  1.0000
  -3   7   1    1215      71                                                         965   -7.32    0.00  1.0000
  -3   7   1    1230      66                                                         979   -7.32    0.00  1.0000
  -3   7   1    1257      66                                                        1003   -7.32    0.00  1.0000
  -3   7   1    1336      71                                                        1074   -7.32    0.00  1.0000
   2  -6  -1    1661     159                                                        2328  -14.48    0.00  1.0000
  -2   6   1    1607     159                                                        2264  -14.48    0.00  1.0000
  -2   6   1    2049     158                                                        2784  -14.48    0.00  1.0000
   1  -5  -1    4512     462                                                        7488  -37.40    0.00  1.0000
  -1   5   1    4325     462                                                        7246  -37.40    0.00  1.0000
   0  -4  -1   13892     802                                                       12151  -14.75    0.00  1.0000
   0  -4  -1   14638     801                                                       12849  -14.75    0.00  1.0000
   0   4   1   15025     805                                                       13212  -14.75    0.00  1.0000
   0   4   1   15226     803                                                       13401  -14.75    0.00  1.0000
   0   4   1   14736     802                                                       12941  -14.75    0.00  1.0000
  -1  -3  -1    3416      39                                                         550  -67.62    0.00  1.0000
   1   3   1    3580      39                                                         617  -67.62    0.00  1.0000
   1   3   1    3436      39                                                         558  -67.62    0.00  1.0000
  -2  -2  -1   15140    1145                                                       18212  -23.01    0.00  1.0000
  -2  -2  -1   15470    1148                                                       18574  -23.01    0.00  1.0000
   2   2   1   14670    1150                                                       17696  -23.01    0.00  1.0000
   2   2   1   16105    1151                                                       19269  -23.01    0.00  1.0000
  -3  -1  -1   65732    4631                                                       68221   -9.29    0.00  1.0000
  -3  -1  -1   76592    4644                                                       79277   -9.29    0.00  1.0000
   3   1   1   73830    4640                                                       76466   -9.29    0.00  1.0000
   3   1   1   71366    4633                                                       73958   -9.29    0.00  1.0000
  -5   1  -1    2784     136                                                        2024  -15.02    0.00  1.0000
   5  -1   1    2785     135                                                        2025  -15.02    0.00  1.0000
   5  -1   1    2921     136                                                        2141  -15.02    0.00  1.0000
  -6   2  -1    1124      44                                                         542   19.82    0.00  1.0000
  -6   2  -1    1144      43                                                         556   19.82    0.00  1.0000
   6  -2   1    1219      44                                                         609   19.82    0.00  1.0000
   6  -2   1    1067      43                                                         503   19.82    0.00  1.0000
  -7   3  -1    7541     602                                                        9557  -21.11    0.00  1.0000
  -7   3  -1    7215     603                                                        9190  -21.11    0.00  1.0000
   7  -3   1    7445     604                                                        9449  -21.11    0.00  1.0000
   7  -3   1    8258     603                                                       10362  -21.11    0.00  1.0000
   7  -3   1    7273     602                                                        9255  -21.11    0.00  1.0000
  -8   4  -1    2581     121                                                        1785   16.54    0.00  1.0000
  -8   4  -1    2489     122                                                        1708   16.54    0.00  1.0000
   8  -4   1    2538     122                                                        1749   16.54    0.00  1.0000
   8  -4   1    2649     122                                                        1841   16.54    0.00  1.0000
  -9   5  -1      32      25                                                         176  -14.78    0.00  1.0000
  -9   5  -1      39      28                                                         193  -14.78    0.00  1.0000
   9  -5   1      15      22                                                         134  -14.78    0.00  1.0000
   9  -5   1      33      27                                                         179  -14.78    0.00  1.0000
   9  -5   1      26      27                                                         162  -14.78    0.00  1.0000
 -10   6  -1     114      14                                                          33    9.79    0.00  1.0000
 -10   6  -1      88      16                                                          20    9.79    0.00  1.0000
  10  -6   1     148      22                                                          53    9.79    0.00  1.0000
  10  -6   1     104      17                                                          28    9.79    0.00  1.0000
  10  -6   1     135      16                                                          45    9.79    0.00  1.0000
 -11   7  -1    4623     337                                                        4832   -2.94    0.00  1.0000
 -11   7  -1    5129     337                                                        5349   -2.94    0.00  1.0000
  11  -7   1    4618     336                                                        4827   -2.94    0.00  1.0000
  11  -7   1    5083     336                                                        5302   -2.94    0.00  1.0000
  11  -7   1    5313     342                                                        5537   -2.94    0.00  1.0000
 -12   8  -1    1252      98                                                        1129    3.44    0.00  1.0000
 -12   8  -1    1370      93                                                        1241    3.44    0.00  1.0000
  12  -8   1    1151      92                                                        1033    3.44    0.00  1.0000
  12  -8   1    1415     104                                                        1284    3.44    0.00  1.0000
  12  -8   1    1478      97                                                        1344    3.44    0.00  1.0000
 -13   9  -1       1      28                                                          -4   -1.42    0.00  1.0000
 -13   9  -1       6      20                                                          10   -1.42    0.00  1.0000
  13  -9   1      40      23                                                          50   -1.42    0.00  1.0000
  13  -9   1       1      31                                                         -13   -1.42    0.00  1.0000
  13  -9   1       1      26                                                          -7   -1.42    0.00  1.0000
  11 -17  -1     401      56                                                         382   -0.91    0.00  1.0000
 -11  17   1     322      48                                                         305   -0.91    0.00  1.0000
 -11  17   1     388      36                                                         370   -0.91    0.00  1.0000
  10 -16  -1     499      34                                                         451    2.15    0.00  1.0000
  10 -16  -1     463      51                                                         416    2.15    0.00  1.0000
  10 -16  -1     454      37                                                         408    2.15    0.00  1.0000
 -10  16   1     498      47                                                         450    2.15    0.00  1.0000
 -10  16   1     515      38                                                         466    2.15    0.00  1.0000
   9 -15  -1    1749     133                                                        1935   -4.20    0.00  1.0000
   9 -15  -1    1783     122                                                        1971   -4.20    0.00  1.0000
  -9  15   1    1661     130                                                        1843   -4.20    0.00  1.0000
  -9  15   1    1719     126                                                        1904   -4.20    0.00  1.0000
   8 -14  -1       6       9                                                          14    2.70    0.00  1.0000
   8 -14  -1       4       7                                                          12    2.70    0.00  1.0000
   8 -14  -1       4      14                                                          12    2.70    0.00  1.0000
  -8  14   1       4      13                                                          12    2.70    0.00  1.0000
  -8  14   1       6      15                                                          14    2.70    0.00  1.0000
  -8  14   1       2      19                                                          -8    2.70    0.00  1.0000
   7 -13  -1     909      59                                                         797   -3.70    0.00  1.0000
   7 -13  -1     810      51                                                         705   -3.70    0.00  1.0000
   7 -13  -1     873      50                                                         763   -3.70    0.00  1.0000
  -7  13   1     807      65                                                         702   -3.70    0.00  1.0000
  -7  13   1     881      56                                                         771   -3.70    0.00  1.0000
  -7  13   1     868      62                                                         759   -3.70    0.00  1.0000
  -7  13   1     871      52                                                         762   -3.70    0.00  1.0000
   6 -12  -1     319      30                                                         316    0.17    0.00  1.0000
  -6  12   1     241      34                                                         238    0.17    0.00  1.0000
  -6  12   1     280      23                                                         277    0.17    0.00  1.0000
  -6  12   1     274      33                                                         271    0.17    0.00  1.0000
  -6  12   1     304      26                                                         301    0.17    0.00  1.0000
   5 -11  -1    8152     418                                                        7406    8.17    0.00  1.0000
  -5  11   1    7108     414                                                        6413    8.17    0.00  1.0000
  -5  11   1    7159     421                                                        6461    8.17    0.00  1.0000
  -5  11   1    7269     413                                                        6566    8.17    0.00  1.0000
  -5  11   1    6885     422                                                        6201    8.17    0.00  1.0000
   4 -10  -1     994      86                                                        1406  -11.55    0.00  1.0000
  -4  10   1     832      89                                                        1213  -11.55    0.00  1.0000
  -4  10   1     844      89                                                        1227  -11.55    0.00  1.0000
  -4  10   1     852      81                                                        1237  -11.55    0.00  1.0000
  -4  10   1     858      82                                                        1244  -11.55    0.00  1.0000
   3  -9  -1    1696     148                                                        2574   18.45    0.00  1.0000
  -3   9   1    1426     149                                                        2238   18.45    0.00  1.0000
  -3   9   1    1234     150                                                        1996   18.45    0.00  1.0000
  -2   8   1    1919     156                                                        2719  -16.12    0.00  1.0000
  -2   8   1    1393     157                                                        2085  -16.12    0.00  1.0000
  -1   7   1   28616    1400                                                       20002   53.60    0.00  1.0000
  -1   7   1   34573    1406                                                       25029   53.60    0.00  1.0000
   0   6   1    5209     322                                                        5377   -2.23    0.00  1.0000
   0   6   1    4935     328                                                        5098   -2.23    0.00  1.0000
   0   6   1    4860     321                                                        5022   -2.23    0.00  1.0000
  -1  -5  -1    2003     350                                                        5531   57.22    0.00  1.0000
  -1  -5  -1    2160     350                                                        5790   57.22    0.00  1.0000
   1   5   1    2086     350                                                        5669   57.22    0.00  1.0000
   1   5   1    1961     351                                                        5461   57.22    0.00  1.0000
  -2  -4  -1    1212      33                                                         465   25.61    0.00  1.0000
   2   4   1    1217      32                                                         468   25.61    0.00  1.0000
   2   4   1    1152      32                                                         428   25.61    0.00  1.0000
  -3  -3  -1   10507     430                                                        6915   37.40    0.00  1.0000
  -3  -3  -1   10565     430                                                        6962   37.40    0.00  1.0000
   3   3   1   10391     430                                                        6821   37.40    0.00  1.0000
   3   3   1   10306     430                                                        6752   37.40    0.00  1.0000
  -4  -2  -1   26038    1738                                                       28887  -16.61    0.00  1.0000
  -4  -2  -1   24447    1730                                                       27210  -16.61    0.00  1.0000
   4   2   1   25837    1734                                                       28675  -16.61    0.00  1.0000
   4   2   1   23866    1730                                                       26596  -16.61    0.00  1.0000
  -5  -1  -1    2856     139                                                        2085   15.02    0.00  1.0000
   5   1   1    3014     139                                                        2221   15.02    0.00  1.0000
   5   1   1    2825     139                                                        2059   15.02    0.00  1.0000
  -7   1  -1   18521    1233                                                       19413   -6.25    0.00  1.0000
  -7   1  -1   18819    1232                                                       19718   -6.25    0.00  1.0000
   7  -1   1   18574    1233                                                       19467   -6.25    0.00  1.0000
   7  -1   1   19448    1233                                                       20361   -6.25    0.00  1.0000
  -8   2  -1   11379     637                                                       10064   12.28    0.00  1.0000
  -8   2  -1   11230     638                                                        9924   12.28    0.00  1.0000
   8  -2   1   10950     637                                                        9661   12.28    0.00  1.0000
   8  -2   1   12111     638                                                       10753   12.28    0.00  1.0000
  -9   3  -1     302      50                                                         511  -10.13    0.00  1.0000
  -9   3  -1     350      49                                                         574  -10.13    0.00  1.0000
   9  -3   1     395      50                                                         631  -10.13    0.00  1.0000
   9  -3   1     353      50                                                         577  -10.13    0.00  1.0000
   9  -3   1     352      51                                                         576  -10.13    0.00  1.0000
 -10   4  -1    2430     189                                                        2938    9.49    0.00  1.0000
 -10   4  -1    2158     189                                                        2639    9.49    0.00  1.0000
  10  -4   1    2423     192                                                        2931    9.49    0.00  1.0000
  10  -4   1    2110     193                                                        2585    9.49    0.00  1.0000
  10  -4   1    2407     189                                                        2913    9.49    0.00  1.0000
 -11   5  -1      32      24                                                          94   -7.74    0.00  1.0000
 -11   5  -1      32      21                                                          93   -7.74    0.00  1.0000
  11  -5   1      24      20                                                          79   -7.74    0.00  1.0000
  11  -5   1      23      23                                                          77   -7.74    0.00  1.0000
  11  -5   1      40      24                                                         107   -7.74    0.00  1.0000
 -12   6  -1    1747     132                                                        1650    2.27    0.00  1.0000
 -12   6  -1    1956     130                                                        1854    2.27    0.00  1.0000
  12  -6   1    1706     130                                                        1610    2.27    0.00  1.0000
  12  -6   1    1945     131                                                        1843    2.27    0.00  1.0000
  12  -6   1    2181     139                                                        2073    2.27    0.00  1.0000
 -13   7  -1      53      22                                                          35   -2.63    0.00  1.0000
 -13   7  -1       2      26                                                         -17   -2.63    0.00  1.0000
  13  -7   1      49      29                                                          32   -2.63    0.00  1.0000
  13  -7   1      60      26                                                          41   -2.63    0.00  1.0000
 -14   8  -1    1165     115                                                        1221    1.56    0.00  1.0000
 -14   8  -1    1371     108                                                        1431    1.56    0.00  1.0000
  14  -8   1    1118     107                                                        1172    1.56    0.00  1.0000
  14  -8   1    1485     125                                                        1548    1.56    0.00  1.0000
  14  -8   1    1237     110                                                        1294    1.56    0.00  1.0000
  10 -18  -1       8      24                                                          10   -0.65    0.00  1.0000
 -10  18   1      26      11                                                          30   -0.65    0.00  1.0000
 -10  18   1      19      16                                                          22   -0.65    0.00  1.0000
   9 -17  -1    3101     189                                                        3048    0.93    0.00  1.0000
  -9  17   1    2706     177                                                        2656    0.93    0.00  1.0000
  -9  17   1    2723     180                                                        2673    0.93    0.00  1.0000
   8 -16  -1    4408     256                                                        4358    0.73    0.00  1.0000
  -8  16   1    3360     262                                                        3317    0.73    0.00  1.0000
  -8  16   1    3916     246                                                        3869    0.73    0.00  1.0000
  -8  16   1    4040     248                                                        3992    0.73    0.00  1.0000
   7 -15  -1     751      57                                                         737    0.51    0.00  1.0000
  -7  15   1     666      65                                                         652    0.51    0.00  1.0000
  -7  15   1     684      50                                                         670    0.51    0.00  1.0000
  -7  15   1     727      62                                                         713    0.51    0.00  1.0000
  -7  15   1     671      46                                                         657    0.51    0.00  1.0000
   6 -14  -1     394      36                                                         443    2.32    0.00  1.0000
  -6  14   1     325      27                                                         370    2.32    0.00  1.0000
  -6  14   1     278      43                                                         320    2.32    0.00  1.0000
  -6  14   1     315      29                                                         359    2.32    0.00  1.0000
  -6  14   1     311      41                                                         355    2.32    0.00  1.0000
   5 -13  -1    1693     111                                                        1835   -3.27    0.00  1.0000
  -5  13   1    1449     115                                                        1581   -3.27    0.00  1.0000
  -5  13   1    1331     115                                                        1457   -3.27    0.00  1.0000
   4 -12  -1    8119     439                                                        7901    2.35    0.00  1.0000
  -4  12   1    6818     443                                                        6619    2.35    0.00  1.0000
  -4  12   1    6518     443                                                        6323    2.35    0.00  1.0000
  -3  11   1     111      15                                                          73   -3.86    0.00  1.0000
  -3  11   1     115      13                                                          76   -3.86    0.00  1.0000
  -2  10   1    2269     146                                                        2454    3.68    0.00  1.0000
  -2  10   1    1810     148                                                        1976    3.68    0.00  1.0000
  -1   9   1     863      84                                                        1357  -14.41    0.00  1.0000
  -1   9   1     681      87                                                        1125  -14.41    0.00  1.0000
   0   8   1   19815    1482                                                       24125  -28.13    0.00  1.0000
   0   8   1   19322    1487                                                       23581  -28.13    0.00  1.0000
  -1  -7  -1      12       7                                                          43  -18.88    0.00  1.0000
  -1  -7  -1      12       6                                                          43  -18.88    0.00  1.0000
   1   7   1      11       7                                                          45  -18.88    0.00  1.0000
   1   7   1      14       7                                                          39  -18.88    0.00  1.0000
   1   7   1      14      11                                                          39  -18.88    0.00  1.0000
  -2  -6  -1     704       7                                                          35  -39.94    0.00  1.0000
  -2  -6  -1     704       6                                                          35  -39.94    0.00  1.0000
   2   6   1     700       6                                                          34  -39.94    0.00  1.0000
   2   6   1     695       7                                                          33  -39.94    0.00  1.0000
  -3  -5  -1     225      53                                                         724  -23.04    0.00  1.0000
  -3  -5  -1     244      53                                                         759  -23.04    0.00  1.0000
   3   5   1     258      54                                                         782  -23.04    0.00  1.0000
   3   5   1     273      53                                                         808  -23.04    0.00  1.0000
  -4  -4  -1    2152     226                                                        3450  -23.87    0.00  1.0000
  -4  -4  -1    2376     226                                                        3732  -23.87    0.00  1.0000
   4   4   1    2182     226                                                        3488  -23.87    0.00  1.0000
   4   4   1    2176     226                                                        3480  -23.87    0.00  1.0000
  -5  -3  -1    1521      59                                                         782   21.33    0.00  1.0000
  -5  -3  -1    1577      58                                                         822   21.33    0.00  1.0000
   5   3   1    1532      59                                                         790   21.33    0.00  1.0000
   5   3   1    1640      59                                                         868   21.33    0.00  1.0000
  -6  -2  -1    1111      44                                                         533  -19.82    0.00  1.0000
   6   2   1    1112      44                                                         534  -19.82    0.00  1.0000
   6   2   1    1169      43                                                         574  -19.82    0.00  1.0000
  -7  -1  -1   18142    1228                                                       19024    6.25    0.00  1.0000
  -7  -1  -1   18846    1227                                                       19745    6.25    0.00  1.0000
   7   1   1   19677    1228                                                       20596    6.25    0.00  1.0000
   7   1   1   18363    1228                                                       19251    6.25    0.00  1.0000
  -9   1  -1     239      41                                                         407   -9.11    0.00  1.0000
  -9   1  -1     244      39                                                         414   -9.11    0.00  1.0000
   9  -1   1     278      40                                                         457   -9.11    0.00  1.0000
   9  -1   1     195      39                                                         349   -9.11    0.00  1.0000
 -10   2  -1    1397     130                                                        1809    9.98    0.00  1.0000
 -10   2  -1    1446     127                                                        1865    9.98    0.00  1.0000
  10  -2   1    1405     130                                                        1818    9.98    0.00  1.0000
  10  -2   1    1280     128                                                        1676    9.98    0.00  1.0000
  10  -2   1    1468     128                                                        1890    9.98    0.00  1.0000
 -11   3  -1    5248     296                                                        4594   -9.02    0.00  1.0000
 -11   3  -1    4812     297                                                        4187   -9.02    0.00  1.0000
  11  -3   1    5254     300                                                        4600   -9.02    0.00  1.0000
  11  -3   1    5459     297                                                        4792   -9.02    0.00  1.0000
  11  -3   1    5050     298                                                        4409   -9.02    0.00  1.0000
 -12   4  -1      48      27                                                         124    8.17    0.00  1.0000
 -12   4  -1      53      29                                                         132    8.17    0.00  1.0000
  12  -4   1      50      28                                                         127    8.17    0.00  1.0000
  12  -4   1      37      26                                                         105    8.17    0.00  1.0000
  12  -4   1      35      28                                                         102    8.17    0.00  1.0000
 -13   5  -1      10      21                                                          22   -3.03    0.00  1.0000
 -13   5  -1      42      27                                                          65   -3.03    0.00  1.0000
  13  -5   1      19      24                                                          35   -3.03    0.00  1.0000
  13  -5   1      55      31                                                          81   -3.03    0.00  1.0000
  13  -5   1      36      27                                                          57   -3.03    0.00  1.0000
 -14   6  -1     654      86                                                         711    2.11    0.00  1.0000
 -14   6  -1     878      78                                                         944    2.11    0.00  1.0000
  14  -6   1     749      82                                                         810    2.11    0.00  1.0000
  14  -6   1     626      80                                                         682    2.11    0.00  1.0000
  14  -6   1     871      94                                                         937    2.11    0.00  1.0000
  -8  18   1    1042      89                                                        1068   -0.79    0.00  1.0000
  -8  18   1     815      93                                                         838   -0.79    0.00  1.0000
  -7  17   1     308      48                                                         316   -0.43    0.00  1.0000
  -7  17   1     337      53                                                         345   -0.43    0.00  1.0000
  -6  16   1     780      65                                                         718   -2.20    0.00  1.0000
  -6  16   1     695      64                                                         636   -2.20    0.00  1.0000
  -5  15   1    1903     142                                                        1978    1.66    0.00  1.0000
  -5  15   1    1966     143                                                        2043    1.66    0.00  1.0000
  -4  14   1     170      31                                                         222   -3.62    0.00  1.0000
  -4  14   1     156      33                                                         206   -3.62    0.00  1.0000
  -3  13   1     689      48                                                         561    4.97    0.00  1.0000
  -3  13   1     714      52                                                         583    4.97    0.00  1.0000
  -2  12   1    1804     100                                                        1544   -6.14    0.00  1.0000
  -2  12   1    1613     104                                                        1368   -6.14    0.00  1.0000
  -1  11   1    2896     194                                                        3250    6.19    0.00  1.0000
  -1  11   1    2437     199                                                        2763    6.19    0.00  1.0000
   0  10   1     640      63                                                         994   12.03    0.00  1.0000
   0  10   1     516      69                                                         838   12.03    0.00  1.0000
  -1  -9  -1       3      21                                                         253   27.56    0.00  1.0000
  -1  -9  -1      11      20                                                         307   27.56    0.00  1.0000
   1   9   1       6      31                                                         280   27.56    0.00  1.0000
   1   9   1       4      21                                                         264   27.56    0.00  1.0000
   1   9   1      11      23                                                         310   27.56    0.00  1.0000
  -2  -8  -1   11080     783                                                       13243   18.97    0.00  1.0000
  -2  -8  -1    9895     784                                                       11944   18.97    0.00  1.0000
   2   8   1   10527     785                                                       12638   18.97    0.00  1.0000
   2   8   1   10448     784                                                       12551   18.97    0.00  1.0000
  -3  -7  -1   13619    1076                                                       17251   28.30    0.00  1.0000
   3   7   1   13856    1075                                                       17517   28.30    0.00  1.0000
   3   7   1   13452    1076                                                       17063   28.30    0.00  1.0000
  -4  -6  -1    4969     417                                                        6496   19.53    0.00  1.0000
  -4  -6  -1    5023     418                                                        6557   19.53    0.00  1.0000
   4   6   1    5170     417                                                        6725   19.53    0.00  1.0000
   4   6   1    5171     418                                                        6726   19.53    0.00  1.0000
  -5  -5  -1     118      23                                                         232    8.48    0.00  1.0000
  -5  -5  -1     126      23                                                         244    8.48    0.00  1.0000
   5   5   1     112      22                                                         224    8.48    0.00  1.0000
   5   5   1     104      23                                                         213    8.48    0.00  1.0000
  -6  -4  -1     783      32                                                         365  -17.17    0.00  1.0000
  -6  -4  -1     774      33                                                         359  -17.17    0.00  1.0000
   6   4   1     767      33                                                         354  -17.17    0.00  1.0000
   6   4   1     827      33                                                         395  -17.17    0.00  1.0000
  -7  -3  -1    7683     605                                                        9717   21.11    0.00  1.0000
  -7  -3  -1    7501     606                                                        9512   21.11    0.00  1.0000
   7   3   1    7705     605                                                        9742   21.11    0.00  1.0000
   7   3   1    7433     606                                                        9435   21.11    0.00  1.0000
  -8  -2  -1   11950     644                                                       10601  -12.28    0.00  1.0000
  -8  -2  -1   11213     645                                                        9908  -12.28    0.00  1.0000
   8   2   1   11204     645                                                        9899  -12.28    0.00  1.0000
   8   2   1   11786     644                                                       10447  -12.28    0.00  1.0000
  -9  -1  -1     261      40                                                         436    9.11    0.00  1.0000
  -9  -1  -1     231      42                                                         396    9.11    0.00  1.0000
   9   1   1     231      41                                                         396    9.11    0.00  1.0000
   9   1   1     246      40                                                         416    9.11    0.00  1.0000
 -11   1  -1    3863     244                                                        3562   -4.77    0.00  1.0000
 -11   1  -1    4121     242                                                        3810   -4.77    0.00  1.0000
  11  -1   1    3388     249                                                        3107   -4.77    0.00  1.0000
  11  -1   1    4227     243                                                        3912   -4.77    0.00  1.0000
  11  -1   1    4097     246                                                        3787   -4.77    0.00  1.0000
 -12   2  -1    1824     152                                                        2084    5.69    0.00  1.0000
 -12   2  -1    1921     148                                                        2188    5.69    0.00  1.0000
  12  -2   1    1917     149                                                        2183    5.69    0.00  1.0000
  12  -2   1    1734     151                                                        1988    5.69    0.00  1.0000
  12  -2   1    1806     153                                                        2065    5.69    0.00  1.0000
 -13   3  -1     135      42                                                         234   -7.12    0.00  1.0000
 -13   3  -1     159      43                                                         266   -7.12    0.00  1.0000
  13  -3   1     159      44                                                         265   -7.12    0.00  1.0000
  13  -3   1     159      42                                                         265   -7.12    0.00  1.0000
  13  -3   1     163      40                                                         271   -7.12    0.00  1.0000
 -14   4  -1     244      35                                                         182    4.09    0.00  1.0000
 -14   4  -1     164      35                                                         114    4.09    0.00  1.0000
  14  -4   1     165      34                                                         115    4.09    0.00  1.0000
  14  -4   1     256      36                                                         193    4.09    0.00  1.0000
  14  -4   1     253      45                                                         190    4.09    0.00  1.0000
 -15   5  -1      48      26                                                          29   -2.92    0.00  1.0000
 -15   5  -1      66      38                                                          44   -2.92    0.00  1.0000
  15  -5   1     117      49                                                          87   -2.92    0.00  1.0000
  15  -5   1      51      39                                                          32   -2.92    0.00  1.0000
  15  -5   1      75      36                                                          51   -2.92    0.00  1.0000
  -7  19   1      87      33                                                         107    2.00    0.00  1.0000
  -7  19   1      83      33                                                         103    2.00    0.00  1.0000
  -6  18   1     510      63                                                         495   -0.66    0.00  1.0000
  -6  18   1     613      65                                                         596   -0.66    0.00  1.0000
  -5  17   1    4197     302                                                        4396    2.94    0.00  1.0000
  -5  17   1    4535     305                                                        4742    2.94    0.00  1.0000
  -4  16   1    1490     107                                                        1413   -1.94    0.00  1.0000
  -4  16   1    1571     110                                                        1492   -1.94    0.00  1.0000
  -3  15   1       7      14                                                         -13    5.01    0.00  1.0000
  -3  15   1       7      13                                                          -2    5.01    0.00  1.0000
  -2  14   1      43      15                                                          13   -5.75    0.00  1.0000
  -2  14   1      67      11                                                          27   -5.75    0.00  1.0000
  -1  13   1    2619     220                                                        3158    9.70    0.00  1.0000
  -1  13   1    2845     213                                                        3405    9.70    0.00  1.0000
   0  12   1    3868     215                                                        3038  -13.68    0.00  1.0000
   0  12   1    4252     206                                                        3380  -13.68    0.00  1.0000
   1  11   1      21       4                                                           4   -5.71    0.00  1.0000
   1  11   1      25      11                                                           6   -5.71    0.00  1.0000
  -2 -10  -1     468     102                                                        1472  -32.33    0.00  1.0000
  -2 -10  -1     630     101                                                        1749  -32.33    0.00  1.0000
   2  10   1     506     102                                                        1539  -32.33    0.00  1.0000
   2  10   1     526     104                                                        1573  -32.33    0.00  1.0000
  -3  -9  -1     276      17                                                         183   -5.99    0.00  1.0000
  -3  -9  -1     261      18                                                         171   -5.99    0.00  1.0000
   3   9   1     274      18                                                         181   -5.99    0.00  1.0000
   3   9   1     287      20                                                         192   -5.99    0.00  1.0000
  -4  -8  -1   14206     687                                                       10934  -28.26    0.00  1.0000
   4   8   1   14522     686                                                       11212  -28.26    0.00  1.0000
   4   8   1   14023     687                                                       10774  -28.26    0.00  1.0000
  -5  -7  -1    3078     167                                                        2725   -6.34    0.00  1.0000
  -5  -7  -1    2875     168                                                        2534   -6.34    0.00  1.0000
   5   7   1    2900     167                                                        2557   -6.34    0.00  1.0000
   5   7   1    2765     168                                                        2431   -6.34    0.00  1.0000
  -6  -6  -1    2173     148                                                        2326   -3.11    0.00  1.0000
  -6  -6  -1    1941     149                                                        2085   -3.11    0.00  1.0000
   6   6   1    2204     149                                                        2358   -3.11    0.00  1.0000
   6   6   1    2066     150                                                        2215   -3.11    0.00  1.0000
  -7  -5  -1     251      19                                                         101   11.21    0.00  1.0000
  -7  -5  -1     279      19                                                         119   11.21    0.00  1.0000
   7   5   1     254      17                                                         103   11.21    0.00  1.0000
   7   5   1     284      21                                                         122   11.21    0.00  1.0000
  -8  -4  -1    2599     120                                                        1800  -16.54    0.00  1.0000
  -8  -4  -1    2512     122                                                        1727  -16.54    0.00  1.0000
   8   4   1    2560     120                                                        1767  -16.54    0.00  1.0000
   8   4   1    2443     121                                                        1670  -16.54    0.00  1.0000
  -9  -3  -1     355      52                                                         580   10.13    0.00  1.0000
  -9  -3  -1     358      50                                                         584   10.13    0.00  1.0000
   9   3   1     369      50                                                         598   10.13    0.00  1.0000
   9   3   1     330      51                                                         548   10.13    0.00  1.0000
 -10  -2  -1    1369     131                                                        1777   -9.98    0.00  1.0000
 -10  -2  -1    1484     129                                                        1908   -9.98    0.00  1.0000
  10   2   1    1449     129                                                        1868   -9.98    0.00  1.0000
  10   2   1    1355     131                                                        1762   -9.98    0.00  1.0000
 -11  -1  -1    4110     243                                                        3800    4.77    0.00  1.0000
 -11  -1  -1    3808     245                                                        3510    4.77    0.00  1.0000
  11   1   1    3805     245                                                        3507    4.77    0.00  1.0000
  11   1   1    4123     243                                                        3812    4.77    0.00  1.0000
 -13   1  -1     177      52                                                         188   -0.75    0.00  1.0000
 -13   1  -1     183      35                                                         194   -0.75    0.00  1.0000
  13  -1   1     182      32                                                         193   -0.75    0.00  1.0000
  13  -1   1     136      32                                                         145   -0.75    0.00  1.0000
  13  -1   1     125      33                                                         134   -0.75    0.00  1.0000
 -14   2  -1     710      81                                                         637    2.73    0.00  1.0000
 -14   2  -1     844      71                                                         764    2.73    0.00  1.0000
  14  -2   1     687      75                                                         615    2.73    0.00  1.0000
  14  -2   1     880      85                                                         798    2.73    0.00  1.0000
  14  -2   1     894      76                                                         812    2.73    0.00  1.0000
 -15   3  -1    1157     130                                                        1218   -1.72    0.00  1.0000
 -15   3  -1    1422     115                                                        1490   -1.72    0.00  1.0000
  15  -3   1    1458     131                                                        1526   -1.72    0.00  1.0000
  15  -3   1    1472     120                                                        1541   -1.72    0.00  1.0000
  15  -3   1    1143     120                                                        1204   -1.72    0.00  1.0000
  -6  20   1     101      41                                                         113   -1.09    0.00  1.0000
  -6  20   1      71      35                                                          81   -1.09    0.00  1.0000
  -5  19   1      92      30                                                          93   -0.09    0.00  1.0000
  -5  19   1      28      23                                                          29   -0.09    0.00  1.0000
  -4  18   1    1139      87                                                        1070   -2.00    0.00  1.0000
  -4  18   1     911      78                                                         850   -2.00    0.00  1.0000
  -3  17   1      37      18                                                          34   -0.42    0.00  1.0000
  -3  17   1      32      21                                                          30   -0.42    0.00  1.0000
  -2  16   1     389      42                                                         429   -1.90    0.00  1.0000
  -2  16   1     446      73                                                         488   -1.90    0.00  1.0000
  -1  15   1     560      59                                                         574   -0.59    0.00  1.0000
  -1  15   1     615      49                                                         630   -0.59    0.00  1.0000
   0  14   1       0       7                                                          -2   -1.36    0.00  1.0000
   0  14   1       6      15                                                           8   -1.36    0.00  1.0000
   1  13   1     279      27                                                         388    5.77    0.00  1.0000
   1  13   1     273      43                                                         380    5.77    0.00  1.0000
   1  13   1     302      32                                                         415    5.77    0.00  1.0000
  -2 -12  -1    1798      86                                                        1195   15.15    0.00  1.0000
  -2 -12  -1    2075      84                                                        1423   15.15    0.00  1.0000
   2  12   1    1907     100                                                        1284   15.15    0.00  1.0000
   2  12   1    1966      88                                                        1333   15.15    0.00  1.0000
   2  12   1    1977      86                                                        1342   15.15    0.00  1.0000
  -3 -11  -1    3330     162                                                        2364   17.58    0.00  1.0000
  -3 -11  -1    3726     161                                                        2699   17.58    0.00  1.0000
   3  11   1    3545     162                                                        2545   17.58    0.00  1.0000
   3  11   1    3483     164                                                        2493   17.58    0.00  1.0000
  -4 -10  -1    2521     134                                                        2088    8.72    0.00  1.0000
  -4 -10  -1    2472     136                                                        2044    8.72    0.00  1.0000
   4  10   1    2474     134                                                        2045    8.72    0.00  1.0000
  -5  -9  -1     195      43                                                         513   16.81    0.00  1.0000
   5   9   1     215      41                                                         546   16.81    0.00  1.0000
   5   9   1     189      42                                                         504   16.81    0.00  1.0000
  -6  -8  -1    4629     277                                                        4524    1.50    0.00  1.0000
  -6  -8  -1    4401     279                                                        4298    1.50    0.00  1.0000
   6   8   1    4218     279                                                        4118    1.50    0.00  1.0000
   6   8   1    4485     278                                                        4381    1.50    0.00  1.0000
  -7  -7  -1   12233     794                                                       12140    0.81    0.00  1.0000
  -7  -7  -1   13540     792                                                       13442    0.81    0.00  1.0000
   7   7   1   12442     794                                                       12348    0.81    0.00  1.0000
   7   7   1   12642     792                                                       12548    0.81    0.00  1.0000
  -8  -6  -1     974      86                                                        1248   -7.96    0.00  1.0000
  -8  -6  -1     920      88                                                        1186   -7.96    0.00  1.0000
   8   6   1     826      87                                                        1079   -7.96    0.00  1.0000
   8   6   1     928      85                                                        1196   -7.96    0.00  1.0000
  -9  -5  -1      23      25                                                         156   14.78    0.00  1.0000
  -9  -5  -1      32      27                                                         178   14.78    0.00  1.0000
   9   5   1      26      25                                                         162   14.78    0.00  1.0000
   9   5   1      16      26                                                         136   14.78    0.00  1.0000
 -10  -4  -1    2306     189                                                        2802   -9.49    0.00  1.0000
 -10  -4  -1    2316     185                                                        2813   -9.49    0.00  1.0000
  10   4   1    2299     185                                                        2794   -9.49    0.00  1.0000
  10   4   1    2135     188                                                        2613   -9.49    0.00  1.0000
 -11  -3  -1    5232     291                                                        4579    9.02    0.00  1.0000
 -11  -3  -1    4970     294                                                        4334    9.02    0.00  1.0000
  11   3   1    5166     291                                                        4517    9.02    0.00  1.0000
  11   3   1    4926     294                                                        4293    9.02    0.00  1.0000
 -12  -2  -1    1978     149                                                        2249   -5.69    0.00  1.0000
 -12  -2  -1    1749     152                                                        2004   -5.69    0.00  1.0000
  12   2   1    1913     148                                                        2179   -5.69    0.00  1.0000
  12   2   1    1656     151                                                        1904   -5.69    0.00  1.0000
 -13  -1  -1     249      41                                                         261    0.75    0.00  1.0000
  13   1   1     194      37                                                         205    0.75    0.00  1.0000
  13   1   1     164      35                                                         174    0.75    0.00  1.0000
  13   1   1     183      36                                                         194    0.75    0.00  1.0000
 -15   1  -1     780      96                                                         820   -1.37    0.00  1.0000
 -15   1  -1     889      85                                                         932   -1.37    0.00  1.0000
  15  -1   1     956      93                                                        1000   -1.37    0.00  1.0000
  15  -1   1     874     103                                                         916   -1.37    0.00  1.0000
  15  -1   1     800      94                                                         841   -1.37    0.00  1.0000
  -5  21   1    1408     126                                                        1373    0.91    0.00  1.0000
  -5  21   1    1897     137                                                        1856    0.91    0.00  1.0000
  -4  20   1    1515     126                                                        1530   -0.36    0.00  1.0000
  -4  20   1    1807     136                                                        1823   -0.36    0.00  1.0000
  -3  19   1      83      23                                                          50    3.96    0.00  1.0000
  -3  19   1      84      30                                                          51    3.96    0.00  1.0000
  -2  18   1     488      54                                                         559   -3.01    0.00  1.0000
  -2  18   1     554      68                                                         630   -3.01    0.00  1.0000
  -1  17   1    2801     178                                                        2368    8.24    0.00  1.0000
  -1  17   1    3031     178                                                        2580    8.24    0.00  1.0000
   0  16   1    1688     149                                                        2020   -7.47    0.00  1.0000
   0  16   1    1705     136                                                        2039   -7.47    0.00  1.0000
   1  15   1      27       7                                                           0   10.03    0.00  1.0000
   1  15   1       6      19                                                          16   10.03    0.00  1.0000
   2  14   1       0      10                                                          67  -15.91    0.00  1.0000
   2  14   1       0      27                                                          66  -15.91    0.00  1.0000
   2  14   1       1      14                                                          83  -15.91    0.00  1.0000
   2  14   1       0      11                                                          72  -15.91    0.00  1.0000
  -3 -13  -1    4460     274                                                        4825   -5.18    0.00  1.0000
  -3 -13  -1    3623     276                                                        3952   -5.18    0.00  1.0000
   3  13   1    3928     278                                                        4271   -5.18    0.00  1.0000
   3  13   1    4179     276                                                        4532   -5.18    0.00  1.0000
   3  13   1    3896     291                                                        4237   -5.18    0.00  1.0000
  -4 -12  -1    5093     441                                                        6425  -16.99    0.00  1.0000
  -4 -12  -1    5885     439                                                        7311  -16.99    0.00  1.0000
   4  12   1    5535     443                                                        6920  -16.99    0.00  1.0000
   4  12   1    5925     441                                                        7355  -16.99    0.00  1.0000
  -5 -11  -1     703      59                                                         781   -2.78    0.00  1.0000
  -5 -11  -1     719      56                                                         798   -2.78    0.00  1.0000
   5  11   1     724      57                                                         803   -2.78    0.00  1.0000
   5  11   1     669      59                                                         746   -2.78    0.00  1.0000
  -6 -10  -1    1021      53                                                         711  -10.23    0.00  1.0000
  -6 -10  -1     994      55                                                         688  -10.23    0.00  1.0000
   6  10   1    1061      54                                                         744  -10.23    0.00  1.0000
   6  10   1     957      55                                                         658  -10.23    0.00  1.0000
  -7  -9  -1     178      26                                                         185   -0.48    0.00  1.0000
  -7  -9  -1     171      22                                                         177   -0.48    0.00  1.0000
   7   9   1     129      23                                                         135   -0.48    0.00  1.0000
   7   9   1     154      22                                                         160   -0.48    0.00  1.0000
  -8  -8  -1    4054     235                                                        3869    2.84    0.00  1.0000
  -8  -8  -1    3721     237                                                        3544    2.84    0.00  1.0000
   8   8   1    3735     235                                                        3557    2.84    0.00  1.0000
   8   8   1    3616     238                                                        3441    2.84    0.00  1.0000
  -9  -7  -1     303      42                                                         277    1.49    0.00  1.0000
  -9  -7  -1     403      36                                                         373    1.49    0.00  1.0000
   9   7   1     304      32                                                         278    1.49    0.00  1.0000
   9   7   1     249      36                                                         225    1.49    0.00  1.0000
 -10  -6  -1     138      20                                                          47   -9.79    0.00  1.0000
 -10  -6  -1     123      16                                                          38   -9.79    0.00  1.0000
  10   6   1     106      13                                                          29   -9.79    0.00  1.0000
  10   6   1      78      16                                                          15   -9.79    0.00  1.0000
 -11  -5  -1      23      24                                                          78    7.74    0.00  1.0000
 -11  -5  -1      32      23                                                          94    7.74    0.00  1.0000
  11   5   1      40      23                                                         106    7.74    0.00  1.0000
  11   5   1      16      24                                                          64    7.74    0.00  1.0000
 -12  -4  -1      54      25                                                         133   -8.17    0.00  1.0000
 -12  -4  -1      40      30                                                         111   -8.17    0.00  1.0000
  12   4   1      42      27                                                         114   -8.17    0.00  1.0000
  12   4   1      28      28                                                          90   -8.17    0.00  1.0000
 -13  -3  -1     154      42                                                         259    7.12    0.00  1.0000
 -13  -3  -1     232      45                                                         358    7.12    0.00  1.0000
  13   3   1     112      42                                                         204    7.12    0.00  1.0000
  13   3   1     173      46                                                         283    7.12    0.00  1.0000
 -14  -2  -1     753      97                                                         678   -2.73    0.00  1.0000
 -14  -2  -1     894      81                                                         812   -2.73    0.00  1.0000
  14   2   1     615      76                                                         547   -2.73    0.00  1.0000
  14   2   1     842      75                                                         762   -2.73    0.00  1.0000
  14   2   1     720      79                                                         646   -2.73    0.00  1.0000
 -15  -1  -1     744      98                                                         783    1.37    0.00  1.0000
 -15  -1  -1     827      84                                                         868    1.37    0.00  1.0000
  15   1   1     816      94                                                         857    1.37    0.00  1.0000
  15   1   1     669      94                                                         706    1.37    0.00  1.0000
  15   1   1     940      91                                                         984    1.37    0.00  1.0000
  -3  21   1     103      31                                                         116   -1.23    0.00  1.0000
  -3  21   1     125      44                                                         140   -1.23    0.00  1.0000
  -2  20   1     169      29                                                         159   -0.73    0.00  1.0000
  -2  20   1     182      43                                                         172   -0.73    0.00  1.0000
  -1  19   1      16      28                                                           7   -2.61    0.00  1.0000
  -1  19   1      33      16                                                          19   -2.61    0.00  1.0000
   0  18   1    1441     120                                                        1480   -0.98    0.00  1.0000
   0  18   1    1420     104                                                        1459   -0.98    0.00  1.0000
   1  17   1     282      29                                                         282    0.00    0.00  1.0000
   1  17   1     231      40                                                         231    0.00    0.00  1.0000
   2  16   1     423      34                                                         373   -2.41    0.00  1.0000
   2  16   1     442      52                                                         391   -2.41    0.00  1.0000
   2  16   1     430      33                                                         380   -2.41    0.00  1.0000
  -3 -15  -1     759      72                                                        1103   10.95    0.00  1.0000
  -3 -15  -1     714      75                                                        1049   10.95    0.00  1.0000
   3  15   1     806      74                                                        1160   10.95    0.00  1.0000
   3  15   1     806      80                                                        1159   10.95    0.00  1.0000
   3  15   1     833      77                                                        1192   10.95    0.00  1.0000
   3  15   1     742      94                                                        1082   10.95    0.00  1.0000
  -4 -14  -1      19       8                                                          44    4.43    0.00  1.0000
  -4 -14  -1       8      13                                                          26    4.43    0.00  1.0000
   4  14   1      19      10                                                          45    4.43    0.00  1.0000
   4  14   1      21      16                                                          48    4.43    0.00  1.0000
  -5 -13  -1      13      11                                                           7   11.91    0.00  1.0000
  -5 -13  -1       2       9                                                          26   11.91    0.00  1.0000
   5  13   1       1      16                                                          45   11.91    0.00  1.0000
   5  13   1       2      10                                                          27   11.91    0.00  1.0000
  -6 -12  -1    2169     133                                                        2102   -1.41    0.00  1.0000
  -6 -12  -1    1989     136                                                        1925   -1.41    0.00  1.0000
   6  12   1    2168     135                                                        2101   -1.41    0.00  1.0000
   6  12   1    1961     137                                                        1897   -1.41    0.00  1.0000
  -7 -11  -1    2288     204                                                        2685    7.70    0.00  1.0000
  -7 -11  -1    2796     208                                                        3233    7.70    0.00  1.0000
   7  11   1    2512     203                                                        2927    7.70    0.00  1.0000
   7  11   1    2927     201                                                        3374    7.70    0.00  1.0000
  -8 -10  -1     574      45                                                         532   -1.72    0.00  1.0000
  -8 -10  -1     524      47                                                         484   -1.72    0.00  1.0000
   8  10   1     481      48                                                         443   -1.72    0.00  1.0000
   8  10   1     588      45                                                         546   -1.72    0.00  1.0000
  -9  -9  -1      43      20                                                          65   -2.93    0.00  1.0000
  -9  -9  -1      74      20                                                         102   -2.93    0.00  1.0000
   9   9   1      58      22                                                          84   -2.93    0.00  1.0000
   9   9   1      76      20                                                         105   -2.93    0.00  1.0000
 -10  -8  -1    1129      98                                                        1244    3.23    0.00  1.0000
 -10  -8  -1    1243      95                                                        1363    3.23    0.00  1.0000
  10   8   1    1050      99                                                        1161    3.23    0.00  1.0000
  10   8   1    1214      96                                                        1333    3.23    0.00  1.0000
 -11  -7  -1    4614     329                                                        4823    2.94    0.00  1.0000
 -11  -7  -1    4961     326                                                        5178    2.94    0.00  1.0000
  11   7   1    4890     326                                                        5105    2.94    0.00  1.0000
  11   7   1    4658     330                                                        4868    2.94    0.00  1.0000
 -12  -6  -1    1867     125                                                        1767   -2.27    0.00  1.0000
 -12  -6  -1    1859     132                                                        1759   -2.27    0.00  1.0000
  12   6   1    1857     131                                                        1757   -2.27    0.00  1.0000
  12   6   1    1635     132                                                        1541   -2.27    0.00  1.0000
 -13  -5  -1      26      27                                                          44    3.03    0.00  1.0000
 -13  -5  -1      22      23                                                          39    3.03    0.00  1.0000
  13   5   1      64      29                                                          91    3.03    0.00  1.0000
  13   5   1       7      28                                                          18    3.03    0.00  1.0000
 -14  -4  -1     187      31                                                         134   -4.09    0.00  1.0000
 -14  -4  -1     216      37                                                         158   -4.09    0.00  1.0000
  14   4   1     205      32                                                         149   -4.09    0.00  1.0000
  14   4   1     147      35                                                         100   -4.09    0.00  1.0000
 -15  -3  -1    1390     113                                                        1457    1.72    0.00  1.0000
 -15  -3  -1    1216     125                                                        1279    1.72    0.00  1.0000
  15   3   1    1251     114                                                        1315    1.72    0.00  1.0000
  15   3   1    1238     123                                                        1301    1.72    0.00  1.0000
  15   3   1    1255     120                                                        1319    1.72    0.00  1.0000
  -2  22   1     256      55                                                         256   -0.01    0.00  1.0000
  -2  22   1     231      40                                                         231   -0.01    0.00  1.0000
  -1  21   1    1392     120                                                        1517    3.18    0.00  1.0000
  -1  21   1    1648     143                                                        1784    3.18    0.00  1.0000
   0  20   1     868      97                                                         845   -0.76    0.00  1.0000
   0  20   1    1025      76                                                        1000   -0.76    0.00  1.0000
   1  19   1      22      14                                                          43    3.69    0.00  1.0000
   1  19   1       7      28                                                          20    3.69    0.00  1.0000
   2  18   1     366      50                                                         314   -2.74    0.00  1.0000
   3  17   1    2410     162                                                        2572    3.15    0.00  1.0000
   3  17   1    2416     167                                                        2579    3.15    0.00  1.0000
   3  17   1    2429     168                                                        2592    3.15    0.00  1.0000
   3  17   1    2304     186                                                        2463    3.15    0.00  1.0000
  -4 -16  -1    2469     117                                                        1959  -10.51    0.00  1.0000
  -4 -16  -1    2270     121                                                        1782  -10.51    0.00  1.0000
   4  16   1    2138     126                                                        1665  -10.51    0.00  1.0000
   4  16   1    2454     127                                                        1945  -10.51    0.00  1.0000
  -5 -15  -1     595      40                                                         570   -1.00    0.00  1.0000
  -5 -15  -1     498      45                                                         475   -1.00    0.00  1.0000
   5  15   1     566      51                                                         542   -1.00    0.00  1.0000
  -6 -14  -1       7      13                                                           4   -8.84    0.00  1.0000
  -6 -14  -1       0      11                                                          24   -8.84    0.00  1.0000
   6  14   1       6      20                                                          50   -8.84    0.00  1.0000
   6  14   1       6      15                                                          50   -8.84    0.00  1.0000
  -7 -13  -1    1696     118                                                        1906    4.79    0.00  1.0000
   7  13   1    1409     123                                                        1601    4.79    0.00  1.0000
   7  13   1    1512     121                                                        1711    4.79    0.00  1.0000
  -8 -12  -1    1582      96                                                        1267   -8.09    0.00  1.0000
   8  12   1    1414      93                                                        1117   -8.09    0.00  1.0000
   8  12   1    1644      90                                                        1323   -8.09    0.00  1.0000
  -9 -11  -1     190      36                                                         282    5.79    0.00  1.0000
  -9 -11  -1     194      35                                                         287    5.79    0.00  1.0000
   9  11   1     171      38                                                         258    5.79    0.00  1.0000
   9  11   1     187      34                                                         278    5.79    0.00  1.0000
 -10 -10  -1     137      29                                                         167   -2.37    0.00  1.0000
 -10 -10  -1     216      33                                                         253   -2.37    0.00  1.0000
  10  10   1     172      33                                                         206   -2.37    0.00  1.0000
  10  10   1     122      32                                                         150   -2.37    0.00  1.0000
 -11  -9  -1     129      29                                                         128   -0.05    0.00  1.0000
 -11  -9  -1     233      35                                                         232   -0.05    0.00  1.0000
  11   9   1     152      34                                                         151   -0.05    0.00  1.0000
  11   9   1     154      26                                                         153   -0.05    0.00  1.0000
 -12  -8  -1    1399      93                                                        1269   -3.44    0.00  1.0000
 -12  -8  -1    1227      98                                                        1106   -3.44    0.00  1.0000
  12   8   1    1168      99                                                        1050   -3.44    0.00  1.0000
  12   8   1    1271      92                                                        1147   -3.44    0.00  1.0000
 -13  -7  -1      83      28                                                          60    2.63    0.00  1.0000
 -13  -7  -1      44      22                                                          28    2.63    0.00  1.0000
  13   7   1       2      26                                                          -6    2.63    0.00  1.0000
  13   7   1       8      21                                                           2    2.63    0.00  1.0000
 -14  -6  -1     768      75                                                         830   -2.11    0.00  1.0000
 -14  -6  -1     688      87                                                         747   -2.11    0.00  1.0000
  14   6   1     622      74                                                         678   -2.11    0.00  1.0000
  14   6   1     602      80                                                         657   -2.11    0.00  1.0000
 -15  -5  -1     114      45                                                          84    2.92    0.00  1.0000
  15   5   1      55      43                                                          35    2.92    0.00  1.0000
  15   5   1       2      31                                                          -7    2.92    0.00  1.0000
   0  22   1     663      96                                                         650   -0.48    0.00  1.0000
   0  22   1     499      60                                                         488   -0.48    0.00  1.0000
   1  21   1      48      20                                                          37   -1.65    0.00  1.0000
   1  21   1       1      38                                                         -19   -1.65    0.00  1.0000
   2  20   1      99      21                                                         101   -0.17    0.00  1.0000
   2  20   1     109      42                                                         111   -0.17    0.00  1.0000
   3  19   1       0      12                                                          -9    0.07    0.00  1.0000
   3  19   1       9      32                                                           9    0.07    0.00  1.0000
   4  18   1    1033      90                                                        1040    0.21    0.00  1.0000
   4  18   1    1227     106                                                        1235    0.21    0.00  1.0000
   4  18   1    1088      74                                                        1095    0.21    0.00  1.0000
   4  18   1    1145      86                                                        1152    0.21    0.00  1.0000
  -5 -17  -1     235      28                                                         336    5.79    0.00  1.0000
   5  17   1     233      30                                                         333    5.79    0.00  1.0000
   5  17   1     317      48                                                         433    5.79    0.00  1.0000
  -6 -16  -1     617      55                                                         570    1.86    0.00  1.0000
  -6 -16  -1     741      49                                                         690    1.86    0.00  1.0000
   6  16   1     721      51                                                         670    1.86    0.00  1.0000
   6  16   1     739      63                                                         688    1.86    0.00  1.0000
  -7 -15  -1    1397     106                                                        1294    2.71    0.00  1.0000
  -7 -15  -1    1701     102                                                        1587    2.71    0.00  1.0000
   7  15   1    1514     124                                                        1407    2.71    0.00  1.0000
   7  15   1    1735     105                                                        1620    2.71    0.00  1.0000
   7  15   1    1632     113                                                        1521    2.71    0.00  1.0000
  -8 -14  -1       1      12                                                         -14   -1.81    0.00  1.0000
   8  14   1      30      14                                                          21   -1.81    0.00  1.0000
   8  14   1       1      17                                                         -11   -1.81    0.00  1.0000
  -9 -13  -1      11      17                                                          26    3.37    0.00  1.0000
   9  13   1       2      19                                                          11    3.37    0.00  1.0000
   9  13   1       6      15                                                          17    3.37    0.00  1.0000
 -10 -12  -1    1202     100                                                        1301   -2.71    0.00  1.0000
 -10 -12  -1    1274      96                                                        1376   -2.71    0.00  1.0000
  10  12   1     992     101                                                        1082   -2.71    0.00  1.0000
  10  12   1    1281      97                                                        1383   -2.71    0.00  1.0000
 -11 -11  -1    1899     143                                                        1845    1.21    0.00  1.0000
 -11 -11  -1    2210     139                                                        2152    1.21    0.00  1.0000
  11  11   1    1918     145                                                        1864    1.21    0.00  1.0000
  11  11   1    1997     138                                                        1942    1.21    0.00  1.0000
 -12 -10  -1     219      38                                                         204    0.98    0.00  1.0000
 -12 -10  -1     323      44                                                         305    0.98    0.00  1.0000
  12  10   1     186      41                                                         172    0.98    0.00  1.0000
  12  10   1     248      37                                                         232    0.98    0.00  1.0000
 -13  -9  -1       4      24                                                           8    1.42    0.00  1.0000
 -13  -9  -1      13      32                                                          19    1.42    0.00  1.0000
  13   9   1       1      29                                                         -63    1.42    0.00  1.0000
  13   9   1       1      23                                                         -22    1.42    0.00  1.0000
 -14  -8  -1    1286     105                                                        1344   -1.56    0.00  1.0000
 -14  -8  -1    1119     116                                                        1174   -1.56    0.00  1.0000
  14   8   1    1183     104                                                        1239   -1.56    0.00  1.0000
   2  22   1     246      59                                                         244    0.10    0.00  1.0000
   2  22   1     327      47                                                         325    0.10    0.00  1.0000
   3  21   1    1470     139                                                        1450    0.49    0.00  1.0000
   3  21   1    1527     107                                                        1507    0.49    0.00  1.0000
   4  20   1     733      54                                                         757   -0.86    0.00  1.0000
   4  20   1     865      65                                                         891   -0.86    0.00  1.0000
   4  20   1     815     100                                                         841   -0.86    0.00  1.0000
   4  20   1     737      65                                                         761   -0.86    0.00  1.0000
   5  19   1       0       9                                                          -3    0.39    0.00  1.0000
   5  19   1      14      36                                                          16    0.39    0.00  1.0000
   5  19   1       3      13                                                           4    0.39    0.00  1.0000
   5  19   1      39      26                                                          42    0.39    0.00  1.0000
  -6 -18  -1     631      65                                                         764   -4.87    0.00  1.0000
  -6 -18  -1     715      58                                                         856   -4.87    0.00  1.0000
   6  18   1     625      93                                                         757   -4.87    0.00  1.0000
   6  18   1     672      78                                                         809   -4.87    0.00  1.0000
   6  18   1     737      61                                                         880   -4.87    0.00  1.0000
  -7 -17  -1    2870     208                                                        2828    0.76    0.00  1.0000
  -7 -17  -1    3539     203                                                        3492    0.76    0.00  1.0000
   7  17   1    3060     215                                                        3017    0.76    0.00  1.0000
   7  17   1    3372     206                                                        3326    0.76    0.00  1.0000
   7  17   1    3065     228                                                        3022    0.76    0.00  1.0000
  -8 -16  -1     864      84                                                         934   -2.26    0.00  1.0000
  -8 -16  -1    1018      77                                                        1094   -2.26    0.00  1.0000
   8  16   1     928     104                                                        1001   -2.26    0.00  1.0000
   8  16   1     935      95                                                        1008   -2.26    0.00  1.0000
   8  16   1    1087      79                                                        1165   -2.26    0.00  1.0000
  -9 -15  -1       2      21                                                          -2    2.64    0.00  1.0000
  -9 -15  -1      24      17                                                          39    2.64    0.00  1.0000
   9  15   1       2      21                                                         -10    2.64    0.00  1.0000
   9  15   1       2      33                                                         -20    2.64    0.00  1.0000
 -10 -14  -1       3      22                                                         -36   -3.30    0.00  1.0000
 -10 -14  -1      28      19                                                          49   -3.30    0.00  1.0000
  10  14   1       3      22                                                         -26   -3.30    0.00  1.0000
 -11 -13  -1     837      76                                                         754    2.86    0.00  1.0000
 -11 -13  -1     971      72                                                         881    2.86    0.00  1.0000
  11  13   1    1066      74                                                         972    2.86    0.00  1.0000
  11  13   1     742      79                                                         664    2.86    0.00  1.0000
 -12 -12  -1     914      78                                                         980   -2.07    0.00  1.0000
 -12 -12  -1     731      85                                                         790   -2.07    0.00  1.0000
  12  12   1     625      85                                                         679   -2.07    0.00  1.0000
  12  12   1     930      80                                                         996   -2.07    0.00  1.0000
 -13 -11  -1       0      35                                                         -22    0.01    0.00  1.0000
 -13 -11  -1       0      26                                                         -15    0.01    0.00  1.0000
  13  11   1       5      33                                                           5    0.01    0.00  1.0000
  13  11   1       0      24                                                         -19    0.01    0.00  1.0000
   6  20   1     630      75                                                         659    1.11    0.00  1.0000
   6  20   1     549      46                                                         576    1.11    0.00  1.0000
   6  20   1     501      78                                                         527    1.11    0.00  1.0000
   6  20   1     613      53                                                         642    1.11    0.00  1.0000
  -7 -19  -1      17      24                                                          23    1.31    0.00  1.0000
  -7 -19  -1      50      15                                                          60    1.31    0.00  1.0000
   7  19   1      72      42                                                          84    1.31    0.00  1.0000
   7  19   1      23      35                                                          30    1.31    0.00  1.0000
   7  19   1      63      17                                                          74    1.31    0.00  1.0000
  -8 -18  -1     465      62                                                         450    0.70    0.00  1.0000
  -8 -18  -1     630      50                                                         612    0.70    0.00  1.0000
   8  18   1     628      92                                                         610    0.70    0.00  1.0000
   8  18   1     681      53                                                         662    0.70    0.00  1.0000
   8  18   1     704      80                                                         685    0.70    0.00  1.0000
  -9 -17  -1      12      17                                                          14   -0.64    0.00  1.0000
  -9 -17  -1       0      27                                                         -28   -0.64    0.00  1.0000
   9  17   1       4      16                                                           5   -0.64    0.00  1.0000
   9  17   1      29      42                                                          33   -0.64    0.00  1.0000
 -10 -16  -1     414      60                                                         410   -0.20    0.00  1.0000
 -10 -16  -1     495      49                                                         490   -0.20    0.00  1.0000
  10  16   1     437      67                                                         433   -0.20    0.00  1.0000
  10  16   1     411      62                                                         407   -0.20    0.00  1.0000
  10  16   1     517      50                                                         512   -0.20    0.00  1.0000
 -11 -15  -1     439      63                                                         458    0.88    0.00  1.0000
  11  15   1     477      67                                                         497    0.88    0.00  1.0000
  11  15   1     465      76                                                         485    0.88    0.00  1.0000
  12  14   1       0      45                                                         -79   -0.90    0.00  1.0000
  12  14   1      63      26                                                          56   -0.90    0.00  1.0000
  13  15  -2    2388     171                                                        2413   -0.49    0.00  1.0000
 -13 -15   2    2561     169                                                        2587   -0.49    0.00  1.0000
  12  16  -2     415      40                                                         376    1.89    0.00  1.0000
  12  16  -2     268      43                                                         237    1.89    0.00  1.0000
 -12 -16   2     306      46                                                         273    1.89    0.00  1.0000
 -12 -16   2     353      49                                                         317    1.89    0.00  1.0000
  11  17  -2      74      18                                                          91   -1.83    0.00  1.0000
  11  17  -2      43      28                                                          56   -1.83    0.00  1.0000
 -11 -17   2      69      20                                                          86   -1.83    0.00  1.0000
 -11 -17   2      36      26                                                          48   -1.83    0.00  1.0000
  10  18  -2    1599     141                                                        1614   -0.37    0.00  1.0000
  10  18  -2    2052     131                                                        2069   -0.37    0.00  1.0000
  10  18  -2    2143     129                                                        2161   -0.37    0.00  1.0000
 -10 -18   2    1964     130                                                        1981   -0.37    0.00  1.0000
 -10 -18   2    1732     140                                                        1748   -0.37    0.00  1.0000
   9  19  -2    2288     135                                                        2315   -0.54    0.00  1.0000
   9  19  -2    1774     144                                                        1798   -0.54    0.00  1.0000
   9  19  -2    2081     133                                                        2106   -0.54    0.00  1.0000
  -9 -19   2    1981     132                                                        2006   -0.54    0.00  1.0000
  -9 -19   2    1655     141                                                        1678   -0.54    0.00  1.0000
   8  20  -2     124      22                                                         141   -1.40    0.00  1.0000
   8  20  -2     136      34                                                         153   -1.40    0.00  1.0000
   8  20  -2     103      19                                                         118   -1.40    0.00  1.0000
  -8 -20   2     106      29                                                         121   -1.40    0.00  1.0000
  -8 -20   2     148      25                                                         166   -1.40    0.00  1.0000
  15  11  -2      58      37                                                          61    0.31    0.00  1.0000
  15  11  -2      52      25                                                          54    0.31    0.00  1.0000
 -15 -11   2      48      26                                                          50    0.31    0.00  1.0000
 -15 -11   2      24      38                                                          26    0.31    0.00  1.0000
  14  12  -2     258      45                                                         237   -1.29    0.00  1.0000
  14  12  -2     358      47                                                         333   -1.29    0.00  1.0000
 -14 -12   2     280      45                                                         258   -1.29    0.00  1.0000
 -14 -12   2     435      46                                                         408   -1.29    0.00  1.0000
  13  13  -2     931      94                                                         919    0.37    0.00  1.0000
  13  13  -2    1169      85                                                        1156    0.37    0.00  1.0000
 -13 -13   2    1228      84                                                        1215    0.37    0.00  1.0000
 -13 -13   2     948      92                                                         936    0.37    0.00  1.0000
  12  14  -2     995      74                                                        1024   -0.87    0.00  1.0000
  12  14  -2     744      83                                                         769   -0.87    0.00  1.0000
 -12 -14   2    1041      73                                                        1070   -0.87    0.00  1.0000
 -12 -14   2     810      78                                                         836   -0.87    0.00  1.0000
  11  15  -2       0      21                                                         -14   -1.23    0.00  1.0000
  11  15  -2      13      15                                                          18   -1.23    0.00  1.0000
 -11 -15   2      15      23                                                          20   -1.23    0.00  1.0000
 -11 -15   2      26      18                                                          33   -1.23    0.00  1.0000
  10  16  -2     116      31                                                         150    2.82    0.00  1.0000
  10  16  -2     150      26                                                         188    2.82    0.00  1.0000
 -10 -16   2     140      29                                                         177    2.82    0.00  1.0000
 -10 -16   2     133      27                                                         169    2.82    0.00  1.0000
   9  17  -2     453      40                                                         442    0.51    0.00  1.0000
   9  17  -2     535      40                                                         523    0.51    0.00  1.0000
   9  17  -2     463      55                                                         452    0.51    0.00  1.0000
  -9 -17   2     519      54                                                         507    0.51    0.00  1.0000
  -9 -17   2     518      42                                                         506    0.51    0.00  1.0000
[truncated: 2,675,082 more chars]
