# Supplementary material for: Hydrolytic cleavage of both CS2 carbon–sulfur bonds by multinuclear Pd(II) complexes at room temperature
Source: Springer Nature journal article supplement (doi:10.1038/nchem.2637), 2016-10-24
Supplement: 41557_2017_BFnchem2637_MOESM3_ESM.mol [file 41557_2017_BFnchem2637_MOESM3_ESM.mol]

nchem.2637-comp1a.mol
  ChemDraw10041614032D

 21 19  0  0  0  0  0  0  0  0999 V2000
   -1.6599    2.5784    0.0000 C   0  0  0  0  0  0  0  0  0  0  0  0
   -2.0623    1.8582    0.0000 C   0  0  0  0  0  0  0  0  0  0  0  0
   -1.6398    1.1496    0.0000 C   0  0  0  0  0  0  0  0  0  0  0  0
   -0.8149    1.1612    0.0000 N   0  0  0  0  0  0  0  0  0  0  0  0
   -0.4125    1.8814    0.0000 C   0  0  0  0  0  0  0  0  0  0  0  0
   -0.8350    2.5900    0.0000 C   0  0  0  0  0  0  0  0  0  0  0  0
    0.4125    1.8930    0.0000 C   0  0  0  0  0  0  0  0  0  0  0  0
    0.8350    1.1844    0.0000 N   0  0  0  0  0  0  0  0  0  0  0  0
    1.6599    1.1960    0.0000 C   0  0  0  0  0  0  0  0  0  0  0  0
    2.0623    1.9162    0.0000 C   0  0  0  0  0  0  0  0  0  0  0  0
    1.6398    2.6248    0.0000 C   0  0  0  0  0  0  0  0  0  0  0  0
    0.8149    2.6132    0.0000 C   0  0  0  0  0  0  0  0  0  0  0  0
   -0.1275   -0.1068    0.0000 Pd  0  2  0  0  0  0  0  0  0  0  0  0
   -1.6167   -1.7998    0.0000 N   0  3  0  0  0  0  0  0  0  0  0  0
   -0.9022   -1.3873    0.0000 O   0  5  0  0  0  0  0  0  0  0  0  0
   -1.6167   -2.6248    0.0000 O   0  0  0  0  0  0  0  0  0  0  0  0
   -2.3311   -1.3873    0.0000 O   0  5  0  0  0  0  0  0  0  0  0  0
    1.6167   -1.7998    0.0000 N   0  3  0  0  0  0  0  0  0  0  0  0
    2.3311   -1.3873    0.0000 O   0  5  0  0  0  0  0  0  0  0  0  0
    1.6167   -2.6248    0.0000 O   0  0  0  0  0  0  0  0  0  0  0  0
    0.9022   -1.3873    0.0000 O   0  5  0  0  0  0  0  0  0  0  0  0
  1  2  2  0      
  2  3  1  0      
  3  4  2  0      
  4  5  1  0      
  5  6  2  0      
  6  1  1  0      
  5  7  1  0      
  7  8  2  0      
  8  9  1  0      
  9 10  2  0      
 10 11  1  0      
 11 12  2  0      
 12  7  1  0      
 14 15  1  0      
 14 16  2  0      
 14 17  1  0      
 18 19  1  0      
 18 20  2  0      
 18 21  1  0      
M  CHG  7  13   2  14   1  15  -1  17  -1  18   1  19  -1  21  -1
M  END
