# Supplementary material for: Hydrolytic cleavage of both CS2 carbon–sulfur bonds by multinuclear Pd(II) complexes at room temperature
Source: Springer Nature journal article supplement (doi:10.1038/nchem.2637), 2016-10-24
Supplement: 41557_2017_BFnchem2637_MOESM14_ESM.mol [file 41557_2017_BFnchem2637_MOESM14_ESM.mol]

nchem.2637-comp2b.mol
  ChemDraw10041614032D

 52 48  0  0  0  0  0  0  0  0999 V2000
    1.5106    3.4675    0.0000 C   0  0  0  0  0  0  0  0  0  0  0  0
    0.6856    3.4675    0.0000 C   0  0  0  0  0  0  0  0  0  0  0  0
    0.2731    2.7530    0.0000 C   0  0  0  0  0  0  0  0  0  0  0  0
    0.6856    2.0386    0.0000 N   0  0  0  0  0  0  0  0  0  0  0  0
    1.5106    2.0386    0.0000 C   0  0  0  0  0  0  0  0  0  0  0  0
    1.9231    2.7530    0.0000 C   0  0  0  0  0  0  0  0  0  0  0  0
   -0.5519    2.7530    0.0000 C   0  0  0  0  0  0  0  0  0  0  0  0
   -0.9644    3.4675    0.0000 C   0  0  0  0  0  0  0  0  0  0  0  0
   -1.7894    3.4675    0.0000 C   0  0  0  0  0  0  0  0  0  0  0  0
   -2.2019    2.7530    0.0000 C   0  0  0  0  0  0  0  0  0  0  0  0
   -1.7894    2.0386    0.0000 C   0  0  0  0  0  0  0  0  0  0  0  0
   -0.9644    2.0386    0.0000 N   0  0  0  0  0  0  0  0  0  0  0  0
   -2.2033    4.1844    0.0000 C   0  0  0  0  0  0  0  0  0  0  0  0
    1.9245    4.1844    0.0000 C   0  0  0  0  0  0  0  0  0  0  0  0
    1.5106   -3.4675    0.0000 C   0  0  0  0  0  0  0  0  0  0  0  0
    0.6856   -3.4675    0.0000 C   0  0  0  0  0  0  0  0  0  0  0  0
    0.2731   -2.7530    0.0000 C   0  0  0  0  0  0  0  0  0  0  0  0
    0.6856   -2.0386    0.0000 N   0  0  0  0  0  0  0  0  0  0  0  0
    1.5106   -2.0386    0.0000 C   0  0  0  0  0  0  0  0  0  0  0  0
    1.9231   -2.7530    0.0000 C   0  0  0  0  0  0  0  0  0  0  0  0
   -0.5519   -2.7530    0.0000 C   0  0  0  0  0  0  0  0  0  0  0  0
   -0.9644   -3.4675    0.0000 C   0  0  0  0  0  0  0  0  0  0  0  0
   -1.7894   -3.4675    0.0000 C   0  0  0  0  0  0  0  0  0  0  0  0
   -2.2019   -2.7530    0.0000 C   0  0  0  0  0  0  0  0  0  0  0  0
   -1.7894   -2.0386    0.0000 C   0  0  0  0  0  0  0  0  0  0  0  0
   -0.9644   -2.0386    0.0000 N   0  0  0  0  0  0  0  0  0  0  0  0
   -2.2033   -4.1844    0.0000 C   0  0  0  0  0  0  0  0  0  0  0  0
    1.9245   -4.1844    0.0000 C   0  0  0  0  0  0  0  0  0  0  0  0
    2.4392    0.0402    0.0000 N   0  3  0  0  0  0  0  0  0  0  0  0
    1.9543   -0.6272    0.0000 O   0  5  0  0  0  0  0  0  0  0  0  0
    1.9543    0.7077    0.0000 O   0  5  0  0  0  0  0  0  0  0  0  0
    3.2642    0.0402    0.0000 O   0  0  0  0  0  0  0  0  0  0  0  0
   -2.7193    0.0402    0.0000 N   0  3  0  0  0  0  0  0  0  0  0  0
   -2.2344   -0.6272    0.0000 O   0  5  0  0  0  0  0  0  0  0  0  0
   -2.2344    0.7077    0.0000 O   0  5  0  0  0  0  0  0  0  0  0  0
   -3.5443    0.0402    0.0000 O   0  0  0  0  0  0  0  0  0  0  0  0
   -0.4343    0.5870    0.0000 Pd  0  2  0  0  0  0  0  0  0  0  0  0
   -0.4343   -0.6272    0.0000 Pd  0  2  0  0  0  0  0  0  0  0  0  0
    5.3898   -2.8050    0.0000 P   0  5  0  0  0  0  0  0  0  0  0  0
    6.1067   -3.2189    0.0000 F   0  0  0  0  0  0  0  0  0  0  0  0
    6.1067   -2.3911    0.0000 F   0  0  0  0  0  0  0  0  0  0  0  0
    5.3898   -1.9772    0.0000 F   0  0  0  0  0  0  0  0  0  0  0  0
    4.6729   -2.3911    0.0000 F   0  0  0  0  0  0  0  0  0  0  0  0
    4.6729   -3.2189    0.0000 F   0  0  0  0  0  0  0  0  0  0  0  0
    5.3898   -3.6328    0.0000 F   0  0  0  0  0  0  0  0  0  0  0  0
   -5.3898    2.9945    0.0000 P   0  5  0  0  0  0  0  0  0  0  0  0
   -4.6729    2.5806    0.0000 F   0  0  0  0  0  0  0  0  0  0  0  0
   -4.6729    3.4084    0.0000 F   0  0  0  0  0  0  0  0  0  0  0  0
   -5.3898    3.8222    0.0000 F   0  0  0  0  0  0  0  0  0  0  0  0
   -6.1067    3.4084    0.0000 F   0  0  0  0  0  0  0  0  0  0  0  0
   -6.1067    2.5806    0.0000 F   0  0  0  0  0  0  0  0  0  0  0  0
   -5.3898    2.1667    0.0000 F   0  0  0  0  0  0  0  0  0  0  0  0
  1  2  2  0      
  2  3  1  0      
  3  4  2  0      
  4  5  1  0      
  5  6  2  0      
  6  1  1  0      
  3  7  1  0      
  7  8  2  0      
  8  9  1  0      
  9 10  2  0      
 10 11  1  0      
 11 12  2  0      
 12  7  1  0      
  9 13  1  0      
  1 14  1  0      
 15 16  2  0      
 16 17  1  0      
 17 18  2  0      
 18 19  1  0      
 19 20  2  0      
 20 15  1  0      
 17 21  1  0      
 21 22  2  0      
 22 23  1  0      
 23 24  2  0      
 24 25  1  0      
 25 26  2  0      
 26 21  1  0      
 23 27  1  0      
 15 28  1  0      
 29 30  1  0      
 29 31  1  0      
 29 32  2  0      
 33 34  1  0      
 33 35  1  0      
 33 36  2  0      
 39 40  1  0      
 39 41  1  0      
 39 42  1  0      
 39 43  1  0      
 39 44  1  0      
 39 45  1  0      
 46 47  1  0      
 46 48  1  0      
 46 49  1  0      
 46 50  1  0      
 46 51  1  0      
 46 52  1  0      
M  CHG  8  29   1  30  -1  31  -1  33   1  34  -1  35  -1  37   2  38   2
M  CHG  2  39  -1  46  -1
M  END
