# Supplementary material for: Hydrolytic cleavage of both CS2 carbon–sulfur bonds by multinuclear Pd(II) complexes at room temperature
Source: Springer Nature journal article supplement (doi:10.1038/nchem.2637), 2016-10-24
Supplement: 41557_2017_BFnchem2637_MOESM17_ESM.cif [file 41557_2017_BFnchem2637_MOESM17_ESM.cif]

 
data_3a
 
_audit_creation_method            SHELXL-2014
_chemical_name_systematic
;
 ?
;
_chemical_name_common             ?
_chemical_melting_point           ?
_chemical_formula_moiety          ?
_chemical_formula_sum
 'C30 H24 F12 N6 P2 Pd3 S2' 
_chemical_formula_weight           1141.81

loop_
 _atom_type_symbol
 _atom_type_description
 _atom_type_scat_dispersion_real
 _atom_type_scat_dispersion_imag
 _atom_type_scat_source
 'C'  'C'   0.0033   0.0016
 'International Tables Vol C Tables 4.2.6.8 and 6.1.1.4'
 'H'  'H'   0.0000   0.0000
 'International Tables Vol C Tables 4.2.6.8 and 6.1.1.4'
 'N'  'N'   0.0061   0.0033
 'International Tables Vol C Tables 4.2.6.8 and 6.1.1.4'
 'F'  'F'   0.0171   0.0103
 'International Tables Vol C Tables 4.2.6.8 and 6.1.1.4'
 'P'  'P'   0.1023   0.0942
 'International Tables Vol C Tables 4.2.6.8 and 6.1.1.4'
 'S'  'S'   0.1246   0.1234
 'International Tables Vol C Tables 4.2.6.8 and 6.1.1.4'
 'Pd'  'Pd'  -0.9988   1.0072
 'International Tables Vol C Tables 4.2.6.8 and 6.1.1.4'
 
_space_group_crystal_system       monoclinic
_space_group_IT_number            14
_space_group_name_H-M_alt         'P 21/n'
_space_group_name_Hall            '-P 2yn'
 
_shelx_space_group_comment
;
The symmetry employed for this shelxl refinement is uniquely defined
by the following loop, which should always be used as a source of
symmetry information in preference to the above space-group names.
They are only intended as comments.
;
 
loop_
 _space_group_symop_operation_xyz
 'x, y, z'
 '-x+1/2, y+1/2, -z+1/2'
 '-x, -y, -z'
 'x-1/2, -y-1/2, z-1/2'
 
_cell_length_a                    14.244(3)
_cell_length_b                    11.940(2)
_cell_length_c                    26.989(5)
_cell_angle_alpha                 90
_cell_angle_beta                  103.37(3)
_cell_angle_gamma                 90
_cell_volume                      4465.7(16)
_cell_formula_units_Z             4
_cell_measurement_temperature     293(2)
_cell_measurement_reflns_used     8180
_cell_measurement_theta_min       2.251
_cell_measurement_theta_max       26.433 
 
_exptl_crystal_description        3a 
_exptl_crystal_colour             yellow
_exptl_crystal_density_meas       ? 
_exptl_crystal_density_method     ?              
_exptl_crystal_density_diffrn     1.698          
_exptl_crystal_F_000              2216.0
_exptl_transmission_factor_min    ?                                             
_exptl_transmission_factor_max    ?                                             
_exptl_crystal_size_max           0.200
_exptl_crystal_size_mid           0.150
_exptl_crystal_size_min           0.100
_exptl_absorpt_coefficient_mu     1.438
_shelx_estimated_absorpt_T_min    0.693
_shelx_estimated_absorpt_T_max    0.827
_exptl_absorpt_correction_type    'none' 
_exptl_absorpt_correction_T_min   0.708 
_exptl_absorpt_correction_T_max   0.821 
_exptl_absorpt_process_details    ? 
 
_exptl_special_details
;
 ?
;
 
_diffrn_ambient_temperature       293(2)
_diffrn_radiation_wavelength      0.71073
_diffrn_radiation_type            MoK\a
_diffrn_source                    ?                       
_diffrn_measurement_device_type   'Bruker P4'
_diffrn_measurement_method        '\w scans'
_diffrn_detector_area_resol_mean  ? 
_diffrn_reflns_number             47708
_diffrn_reflns_av_unetI/netI      0.0196
_diffrn_reflns_av_R_equivalents   0.0290
_diffrn_reflns_limit_h_min        -17
_diffrn_reflns_limit_h_max        17
_diffrn_reflns_limit_k_min        -13
_diffrn_reflns_limit_k_max        14
_diffrn_reflns_limit_l_min        -33
_diffrn_reflns_limit_l_max        33
_diffrn_reflns_theta_min          2.251
_diffrn_reflns_theta_max          26.433
_diffrn_reflns_theta_full         25.242
_diffrn_measured_fraction_theta_max   0.994
_diffrn_measured_fraction_theta_full  1.000
_diffrn_reflns_Laue_measured_fraction_max    0.994
_diffrn_reflns_Laue_measured_fraction_full   1.000
_diffrn_reflns_point_group_measured_fraction_max   0.994
_diffrn_reflns_point_group_measured_fraction_full  1.000
_reflns_number_total              9193 
_reflns_number_gt                 8180
_reflns_threshold_expression      'I > 2\s(I)'
_reflns_Friedel_coverage          0.000
_reflns_Friedel_fraction_max      .
_reflns_Friedel_fraction_full     .
 
_reflns_special_details
;
 Reflections were merged by SHELXL according to the crystal
 class for the calculation of statistics and refinement.
 
 _reflns_Friedel_fraction is defined as the number of unique
 Friedel pairs measured divided by the number that would be
 possible theoretically, ignoring centric projections and
 systematic absences.
;
 
_computing_data_collection        ?
_computing_cell_refinement        ?
_computing_data_reduction         ?
_computing_structure_solution     ?
_computing_structure_refinement   'SHELXL-2014 (Sheldrick, 2014)'
_computing_molecular_graphics     ?
_computing_publication_material   ?
 
_refine_special_details
;
 ?
;
_refine_ls_structure_factor_coef  Fsqd
_refine_ls_matrix_type            full
_refine_ls_weighting_scheme       calc
_refine_ls_weighting_details
'w=1/[\s^2^(Fo^2^)+(0.0315P)^2^+4.1993P] where P=(Fo^2^+2Fc^2^)/3'
_atom_sites_solution_primary      ?
_atom_sites_solution_secondary    ?
_atom_sites_solution_hydrogens    geom
_refine_ls_hydrogen_treatment     constr
_refine_ls_extinction_method      none
_refine_ls_extinction_coef        .
_refine_ls_number_reflns          9142
_refine_ls_number_parameters      496
_refine_ls_number_restraints      0
_refine_ls_R_factor_all           0.0290
_refine_ls_R_factor_gt            0.0254
_refine_ls_wR_factor_ref          0.0652
_refine_ls_wR_factor_gt           0.0634
_refine_ls_goodness_of_fit_ref    1.049
_refine_ls_restrained_S_all       1.049
_refine_ls_shift/su_max           0.005
_refine_ls_shift/su_mean          0.000
 
loop_
 _atom_site_label
 _atom_site_type_symbol
 _atom_site_fract_x
 _atom_site_fract_y
 _atom_site_fract_z
 _atom_site_U_iso_or_equiv
 _atom_site_adp_type
 _atom_site_occupancy
 _atom_site_site_symmetry_order  
 _atom_site_calc_flag
 _atom_site_refinement_flags_posn
 _atom_site_refinement_flags_adp
 _atom_site_refinement_flags_occupancy
 _atom_site_disorder_assembly
 _atom_site_disorder_group
Pd1 Pd 0.76868(2) 0.22323(2) 1.03484(2) 0.02539(5) Uani 1 1 d . . . . .
Pd2 Pd 0.84867(2) 0.00074(2) 0.98953(2) 0.02446(5) Uani 1 1 d . . . . .
Pd3 Pd 0.64802(2) 0.00469(2) 0.98873(2) 0.02428(5) Uani 1 1 d . . . . .
S1 S 0.73702(5) 0.13653(5) 0.95826(2) 0.02831(13) Uani 1 1 d . . . . .
P1 P 0.66207(5) 0.27694(6) 0.80851(3) 0.03796(16) Uani 1 1 d . . . . .
N2 N 0.79639(14) 0.30184(17) 1.10510(7) 0.0273(4) Uani 1 1 d . . . . .
N6 N 0.93189(14) -0.13718(16) 1.01566(7) 0.0275(4) Uani 1 1 d . . . . .
N5 N 0.89267(14) -0.04169(17) 0.92491(7) 0.0277(4) Uani 1 1 d . . . . .
N1 N 0.75757(13) 0.38875(17) 1.01232(7) 0.0263(4) Uani 1 1 d . . . . .
F2 F 0.56058(12) 0.24229(14) 0.77129(6) 0.0455(4) Uani 1 1 d . . . . .
C24 C 0.79310(16) 0.4153(2) 1.10253(9) 0.0278(5) Uani 1 1 d . . . . .
N4 N 0.58333(14) -0.13117(17) 1.01378(7) 0.0283(4) Uani 1 1 d . . . . .
F1 F 0.71417(14) 0.25769(19) 0.76282(7) 0.0613(5) Uani 1 1 d . . . . .
C15 C 0.93965(16) -0.1401(2) 0.92799(9) 0.0297(5) Uani 1 1 d . . . . .
C6 C 0.49758(17) -0.1290(2) 0.92612(9) 0.0288(5) Uani 1 1 d . . . . .
C4 C 0.48104(19) -0.2883(2) 0.98551(11) 0.0389(6) Uani 1 1 d . . . . .
H4 H 0.4389 -0.3264 0.9595 0.047 Uiso 1 1 calc R U . . .
C25 C 0.77254(16) 0.4640(2) 1.05090(9) 0.0288(5) Uani 1 1 d . . . . .
N3 N 0.54568(14) -0.03247(17) 0.92395(7) 0.0269(4) Uani 1 1 d . . . . .
C12 C 0.96012(17) -0.1948(2) 0.97840(9) 0.0305(5) Uani 1 1 d . . . . .
C2 C 0.5685(2) -0.2755(2) 1.07208(11) 0.0415(6) Uani 1 1 d . . . . .
H2 H 0.5848 -0.3039 1.1050 0.050 Uiso 1 1 calc R U . . .
C11 C 1.00493(19) -0.2984(2) 0.98849(11) 0.0401(6) Uani 1 1 d . . . . .
H11 H 1.0227 -0.3386 0.9626 0.048 Uiso 1 1 calc R U . . .
C27 C 0.7481(2) 0.6158(2) 0.99141(11) 0.0397(6) Uani 1 1 d . . . . .
H27 H 0.7452 0.6921 0.9844 0.048 Uiso 1 1 calc R U . . .
C28 C 0.7327(2) 0.5384(2) 0.95226(10) 0.0381(6) Uani 1 1 d . . . . .
H28 H 0.7187 0.5620 0.9185 0.046 Uiso 1 1 calc R U . . .
C8 C 0.4148(2) -0.1085(3) 0.83856(10) 0.0425(6) Uani 1 1 d . . . . .
H8 H 0.3709 -0.1342 0.8098 0.051 Uiso 1 1 calc R U . . .
C13 C 0.94958(18) -0.1788(2) 1.06297(9) 0.0341(5) Uani 1 1 d . . . . .
H13 H 0.9301 -0.1384 1.0883 0.041 Uiso 1 1 calc R U . . .
C20 C 0.81474(18) 0.2513(2) 1.15051(9) 0.0328(5) Uani 1 1 d . . . . .
H20 H 0.8177 0.1735 1.1519 0.039 Uiso 1 1 calc R U . . .
C5 C 0.51982(17) -0.1857(2) 0.97603(9) 0.0294(5) Uani 1 1 d . . . . .
C18 C 0.8954(2) -0.0274(3) 0.83729(10) 0.0407(6) Uani 1 1 d . . . . .
H18 H 0.8797 0.0123 0.8069 0.049 Uiso 1 1 calc R U . . .
C1 C 0.60678(19) -0.1748(2) 1.06075(10) 0.0345(5) Uani 1 1 d . . . . .
H1 H 0.6498 -0.1366 1.0863 0.041 Uiso 1 1 calc R U . . .
C14 C 0.9960(2) -0.2804(2) 1.07533(11) 0.0406(6) Uani 1 1 d . . . . .
H14 H 1.0087 -0.3070 1.1086 0.049 Uiso 1 1 calc R U . . .
C21 C 0.82947(19) 0.3109(3) 1.19548(10) 0.0398(6) Uani 1 1 d . . . . .
H21 H 0.8420 0.2740 1.2267 0.048 Uiso 1 1 calc R U . . .
C3 C 0.5058(2) -0.3333(3) 1.03412(12) 0.0461(7) Uani 1 1 d . . . . .
H3 H 0.4805 -0.4018 1.0411 0.055 Uiso 1 1 calc R U . . .
C10 C 0.52961(19) 0.0255(2) 0.88011(9) 0.0330(5) Uani 1 1 d . . . . .
H10 H 0.5637 0.0914 0.8788 0.040 Uiso 1 1 calc R U . . .
C16 C 0.96678(19) -0.1846(3) 0.88579(10) 0.0398(6) Uani 1 1 d . . . . .
H16 H 1.0000 -0.2522 0.8883 0.048 Uiso 1 1 calc R U . . .
C26 C 0.76777(18) 0.5781(2) 1.04100(10) 0.0349(6) Uani 1 1 d . . . . .
H26 H 0.7778 0.6291 1.0678 0.042 Uiso 1 1 calc R U . . .
C9 C 0.4640(2) -0.0099(2) 0.83696(11) 0.0400(6) Uani 1 1 d . . . . .
H9 H 0.4532 0.0323 0.8072 0.048 Uiso 1 1 calc R U . . .
C17 C 0.9439(2) -0.1272(3) 0.84007(11) 0.0452(7) Uani 1 1 d . . . . .
H17 H 0.9612 -0.1561 0.8114 0.054 Uiso 1 1 calc R U . . .
C7 C 0.43155(18) -0.1691(2) 0.88345(10) 0.0380(6) Uani 1 1 d . . . . .
H7 H 0.3990 -0.2360 0.8851 0.046 Uiso 1 1 calc R U . . .
C19 C 0.87018(19) 0.0134(2) 0.88041(10) 0.0343(6) Uani 1 1 d . . . . .
H19 H 0.8367 0.0807 0.8785 0.041 Uiso 1 1 calc R U . . .
C22 C 0.8253(2) 0.4258(3) 1.19323(10) 0.0452(7) Uani 1 1 d . . . . .
H22 H 0.8345 0.4676 1.2231 0.054 Uiso 1 1 calc R U . . .
C23 C 0.8074(2) 0.4792(2) 1.14661(11) 0.0418(6) Uani 1 1 d . . . . .
H23 H 0.8050 0.5569 1.1448 0.050 Uiso 1 1 calc R U . . .
P2 P 0.84041(5) 0.79609(6) 0.19853(2) 0.03262(14) Uani 1 1 d . . . . .
F12 F 0.80824(15) 0.76842(15) 0.13918(6) 0.0549(5) Uani 1 1 d . . . . .
F9 F 0.75813(18) 0.8846(2) 0.19403(9) 0.0906(8) Uani 1 1 d . . . . .
F11 F 0.92272(17) 0.7041(2) 0.20339(9) 0.0840(8) Uani 1 1 d . . . . .
F7 F 0.87202(16) 0.82120(16) 0.25806(6) 0.0618(5) Uani 1 1 d . . . . .
F10 F 0.7713(2) 0.6994(2) 0.20953(9) 0.0856(8) Uani 1 1 d . . . . .
F8 F 0.9122(2) 0.8880(2) 0.18832(9) 0.0917(9) Uani 1 1 d . . . . .
S2 S 0.77775(5) 0.03800(5) 1.05633(2) 0.02889(12) Uani 1 1 d . . . . .
F4 F 0.60856(13) 0.29631(15) 0.85361(6) 0.0496(4) Uani 1 1 d . . . . .
F3 F 0.64255(15) 0.40454(15) 0.79136(7) 0.0574(5) Uani 1 1 d . . . . .
F6 F 0.67989(14) 0.14858(15) 0.82480(7) 0.0534(4) Uani 1 1 d . . . . .
F5 F 0.76240(14) 0.31077(19) 0.84574(8) 0.0650(5) Uani 1 1 d . . . . .
C29 C 0.73860(19) 0.4261(2) 0.96397(9) 0.0335(5) Uani 1 1 d . . . . .
H29 H 0.7291 0.3743 0.9376 0.040 Uiso 1 1 calc R U . . .
C30 C 1.0230(2) -0.3415(3) 1.03755(12) 0.0442(7) Uani 1 1 d . . . . .
H30 H 1.0530 -0.4106 1.0449 0.053 Uiso 1 1 calc R U . . .
 
loop_
 _atom_site_aniso_label
 _atom_site_aniso_U_11
 _atom_site_aniso_U_22
 _atom_site_aniso_U_33
 _atom_site_aniso_U_23
 _atom_site_aniso_U_13
 _atom_site_aniso_U_12
Pd1 0.03428(10) 0.02413(9) 0.01698(9) -0.00292(6) 0.00433(7) -0.00102(7)
Pd2 0.03113(10) 0.02389(9) 0.01730(9) -0.00154(6) 0.00341(7) -0.00328(7)
Pd3 0.03224(10) 0.02283(9) 0.01751(9) -0.00059(6) 0.00522(7) 0.00191(7)
S1 0.0441(3) 0.0223(3) 0.0171(3) -0.0008(2) 0.0043(2) -0.0011(2)
P1 0.0432(4) 0.0433(4) 0.0273(3) 0.0073(3) 0.0081(3) 0.0017(3)
N2 0.0247(9) 0.0356(11) 0.0213(9) -0.0045(8) 0.0047(8) -0.0010(8)
N6 0.0266(10) 0.0294(10) 0.0244(10) 0.0008(8) 0.0018(8) -0.0033(8)
N5 0.0273(10) 0.0327(11) 0.0226(10) -0.0025(8) 0.0050(8) -0.0069(8)
N1 0.0279(10) 0.0269(10) 0.0235(10) -0.0053(8) 0.0047(8) -0.0007(8)
F2 0.0484(9) 0.0510(10) 0.0340(8) 0.0022(7) 0.0032(7) 0.0011(8)
C24 0.0263(11) 0.0321(12) 0.0243(11) -0.0078(9) 0.0044(9) -0.0004(9)
N4 0.0307(10) 0.0300(10) 0.0254(10) 0.0014(8) 0.0092(8) 0.0036(8)
F1 0.0630(11) 0.0850(14) 0.0427(10) 0.0080(9) 0.0263(9) 0.0075(10)
C15 0.0229(11) 0.0371(13) 0.0290(12) -0.0043(10) 0.0056(9) -0.0045(10)
C6 0.0257(11) 0.0307(12) 0.0314(12) -0.0015(10) 0.0096(9) 0.0039(9)
C4 0.0320(13) 0.0371(14) 0.0474(16) 0.0026(12) 0.0087(12) -0.0036(11)
C25 0.0225(11) 0.0351(13) 0.0283(12) -0.0065(10) 0.0052(9) -0.0008(10)
N3 0.0296(10) 0.0281(10) 0.0233(10) -0.0007(8) 0.0064(8) 0.0056(8)
C12 0.0251(11) 0.0351(13) 0.0310(13) -0.0009(10) 0.0057(10) -0.0037(10)
C2 0.0472(15) 0.0419(15) 0.0375(15) 0.0121(12) 0.0141(12) 0.0017(13)
C11 0.0368(14) 0.0425(16) 0.0435(15) 0.0013(12) 0.0146(12) 0.0052(12)
C27 0.0466(16) 0.0285(13) 0.0433(16) 0.0010(11) 0.0088(12) -0.0014(11)
C28 0.0498(16) 0.0332(13) 0.0305(13) 0.0026(11) 0.0078(12) 0.0008(12)
C8 0.0389(14) 0.0527(17) 0.0306(14) -0.0072(12) -0.0031(11) -0.0001(13)
C13 0.0346(13) 0.0380(14) 0.0276(12) 0.0021(10) 0.0030(10) -0.0031(11)
C20 0.0340(13) 0.0390(14) 0.0251(12) -0.0022(10) 0.0060(10) 0.0003(11)
C5 0.0258(11) 0.0336(12) 0.0305(12) 0.0014(10) 0.0098(10) 0.0032(10)
C18 0.0425(15) 0.0565(17) 0.0234(13) 0.0008(12) 0.0081(11) -0.0026(13)
C1 0.0395(14) 0.0380(14) 0.0286(13) 0.0035(11) 0.0130(11) 0.0049(11)
C14 0.0394(14) 0.0439(16) 0.0367(15) 0.0124(12) 0.0054(12) 0.0042(12)
C21 0.0406(14) 0.0574(17) 0.0196(12) -0.0037(11) 0.0030(10) 0.0042(13)
C3 0.0427(15) 0.0389(15) 0.0600(19) 0.0154(14) 0.0186(14) -0.0007(12)
C10 0.0373(13) 0.0364(13) 0.0254(12) 0.0023(10) 0.0072(10) 0.0031(11)
C16 0.0362(14) 0.0469(16) 0.0378(15) -0.0056(12) 0.0117(11) 0.0021(12)
C26 0.0376(13) 0.0313(13) 0.0351(14) -0.0122(11) 0.0070(11) -0.0026(11)
C9 0.0432(15) 0.0477(16) 0.0264(13) 0.0013(11) 0.0025(11) 0.0029(12)
C17 0.0424(15) 0.064(2) 0.0308(14) -0.0086(13) 0.0129(12) 0.0007(14)
C7 0.0315(13) 0.0405(15) 0.0396(15) -0.0035(12) 0.0033(11) -0.0025(11)
C19 0.0365(13) 0.0407(14) 0.0250(12) -0.0014(10) 0.0059(10) -0.0051(11)
C22 0.0543(17) 0.0538(18) 0.0240(13) -0.0146(12) 0.0019(12) 0.0039(14)
C23 0.0501(16) 0.0389(15) 0.0319(14) -0.0111(11) 0.0006(12) 0.0023(12)
P2 0.0415(4) 0.0334(3) 0.0225(3) -0.0043(2) 0.0066(3) -0.0025(3)
F12 0.0836(13) 0.0524(10) 0.0237(8) -0.0075(7) 0.0024(8) -0.0007(9)
F9 0.0907(16) 0.0949(18) 0.0747(15) -0.0262(13) -0.0046(13) 0.0512(14)
F11 0.0747(14) 0.0912(17) 0.0722(15) -0.0274(13) -0.0118(12) 0.0367(13)
F7 0.1054(16) 0.0497(10) 0.0256(8) -0.0090(7) 0.0054(9) -0.0101(10)
F10 0.126(2) 0.0769(15) 0.0717(14) -0.0339(12) 0.0595(14) -0.0561(15)
F8 0.132(2) 0.0869(16) 0.0718(15) -0.0308(13) 0.0563(15) -0.0668(16)
S2 0.0413(3) 0.0276(3) 0.0166(3) -0.0007(2) 0.0044(2) -0.0002(2)
F4 0.0638(11) 0.0560(10) 0.0313(8) 0.0011(7) 0.0155(8) 0.0032(9)
F3 0.0748(12) 0.0421(10) 0.0544(11) 0.0125(8) 0.0131(9) -0.0041(9)
F6 0.0679(11) 0.0467(10) 0.0443(10) 0.0115(8) 0.0103(8) 0.0150(9)
F5 0.0512(11) 0.0847(14) 0.0528(11) 0.0040(10) -0.0010(9) -0.0099(10)
C29 0.0429(14) 0.0323(13) 0.0243(12) -0.0032(10) 0.0056(10) -0.0005(11)
C30 0.0384(14) 0.0400(15) 0.0552(18) 0.0117(13) 0.0127(13) 0.0084(12)
 
_geom_special_details
;
 All esds (except the esd in the dihedral angle between two l.s. planes)
 are estimated using the full covariance matrix.  The cell esds are taken
 into account individually in the estimation of esds in distances, angles
 and torsion angles; correlations between esds in cell parameters are only
 used when they are defined by crystal symmetry.  An approximate (isotropic)
 treatment of cell esds is used for estimating esds involving l.s. planes.
;
 
loop_
 _geom_bond_atom_site_label_1
 _geom_bond_atom_site_label_2
 _geom_bond_distance
 _geom_bond_site_symmetry_2
 _geom_bond_publ_flag
Pd1 N1 2.063(2) . ?
Pd1 N2 2.0704(19) . ?
Pd1 S1 2.2619(7) . ?
Pd1 S2 2.2825(8) . ?
Pd1 Pd3 3.2129(6) . ?
Pd1 Pd2 3.2396(6) . ?
Pd2 N5 2.048(2) . ?
Pd2 N6 2.056(2) . ?
Pd2 S1 2.2913(7) . ?
Pd2 S2 2.3045(8) . ?
Pd2 Pd3 2.8535(6) . ?
Pd3 N3 2.049(2) . ?
Pd3 N4 2.056(2) . ?
Pd3 S1 2.2898(7) . ?
Pd3 S2 2.3116(10) . ?
P1 F4 1.5954(18) . ?
P1 F1 1.5960(19) . ?
P1 F5 1.597(2) . ?
P1 F3 1.5979(19) . ?
P1 F6 1.5984(19) . ?
P1 F2 1.6120(18) . ?
N2 C20 1.336(3) . ?
N2 C24 1.356(3) . ?
N6 C13 1.339(3) . ?
N6 C12 1.354(3) . ?
N5 C19 1.342(3) . ?
N5 C15 1.345(3) . ?
N1 C29 1.346(3) . ?
N1 C25 1.354(3) . ?
C24 C23 1.388(3) . ?
C24 C25 1.475(3) . ?
N4 C1 1.340(3) . ?
N4 C5 1.361(3) . ?
C15 C16 1.390(4) . ?
C15 C12 1.476(3) . ?
C6 N3 1.349(3) . ?
C6 C7 1.393(4) . ?
C6 C5 1.475(3) . ?
C4 C3 1.386(4) . ?
C4 C5 1.392(4) . ?
C4 H4 0.9300 . ?
C25 C26 1.388(4) . ?
N3 C10 1.344(3) . ?
C12 C11 1.390(4) . ?
C2 C3 1.378(4) . ?
C2 C1 1.383(4) . ?
C2 H2 0.9300 . ?
C11 C30 1.388(4) . ?
C11 H11 0.9300 . ?
C27 C26 1.378(4) . ?
C27 C28 1.382(4) . ?
C27 H27 0.9300 . ?
C28 C29 1.376(4) . ?
C28 H28 0.9300 . ?
C8 C9 1.375(4) . ?
C8 C7 1.384(4) . ?
C8 H8 0.9300 . ?
C13 C14 1.384(4) . ?
C13 H13 0.9300 . ?
C20 C21 1.380(4) . ?
C20 H20 0.9300 . ?
C18 C17 1.370(4) . ?
C18 C19 1.383(4) . ?
C18 H18 0.9300 . ?
C1 H1 0.9300 . ?
C14 C30 1.379(4) . ?
C14 H14 0.9300 . ?
C21 C22 1.374(4) . ?
C21 H21 0.9300 . ?
C3 H3 0.9300 . ?
C10 C9 1.380(4) . ?
C10 H10 0.9300 . ?
C16 C17 1.383(4) . ?
C16 H16 0.9300 . ?
C26 H26 0.9300 . ?
C9 H9 0.9300 . ?
C17 H17 0.9300 . ?
C7 H7 0.9300 . ?
C19 H19 0.9300 . ?
C22 C23 1.380(4) . ?
C22 H22 0.9300 . ?
C23 H23 0.9300 . ?
P2 F9 1.562(2) . ?
P2 F8 1.567(2) . ?
P2 F10 1.589(2) . ?
P2 F11 1.590(2) . ?
P2 F7 1.5937(17) . ?
P2 F12 1.5955(17) . ?
C29 H29 0.9300 . ?
C30 H30 0.9300 . ?
 
loop_
 _geom_angle_atom_site_label_1
 _geom_angle_atom_site_label_2
 _geom_angle_atom_site_label_3
 _geom_angle
 _geom_angle_site_symmetry_1
 _geom_angle_site_symmetry_3
 _geom_angle_publ_flag
N1 Pd1 N2 79.69(8) . . ?
N1 Pd1 S1 100.58(5) . . ?
N2 Pd1 S1 179.40(6) . . ?
N1 Pd1 S2 177.57(5) . . ?
N2 Pd1 S2 102.64(6) . . ?
S1 Pd1 S2 77.08(2) . . ?
N1 Pd1 Pd3 131.77(5) . . ?
N2 Pd1 Pd3 134.00(6) . . ?
S1 Pd1 Pd3 45.45(2) . . ?
S2 Pd1 Pd3 46.00(2) . . ?
N1 Pd1 Pd2 133.16(5) . . ?
N2 Pd1 Pd2 135.09(6) . . ?
S1 Pd1 Pd2 45.01(2) . . ?
S2 Pd1 Pd2 45.345(19) . . ?
Pd3 Pd1 Pd2 52.490(13) . . ?
N5 Pd2 N6 80.12(8) . . ?
N5 Pd2 S1 100.62(6) . . ?
N6 Pd2 S1 171.53(6) . . ?
N5 Pd2 S2 171.69(6) . . ?
N6 Pd2 S2 102.04(6) . . ?
S1 Pd2 S2 76.06(3) . . ?
N5 Pd2 Pd3 120.04(6) . . ?
N6 Pd2 Pd3 120.85(6) . . ?
S1 Pd2 Pd3 51.449(19) . . ?
S2 Pd2 Pd3 51.93(3) . . ?
N5 Pd2 Pd1 136.69(6) . . ?
N6 Pd2 Pd1 138.81(6) . . ?
S1 Pd2 Pd1 44.277(19) . . ?
S2 Pd2 Pd1 44.793(17) . . ?
Pd3 Pd2 Pd1 63.273(13) . . ?
N3 Pd3 N4 79.93(8) . . ?
N3 Pd3 S1 100.73(6) . . ?
N4 Pd3 S1 171.15(6) . . ?
N3 Pd3 S2 172.66(6) . . ?
N4 Pd3 S2 102.32(6) . . ?
S1 Pd3 S2 75.95(2) . . ?
N3 Pd3 Pd2 121.11(6) . . ?
N4 Pd3 Pd2 120.58(6) . . ?
S1 Pd3 Pd2 51.50(2) . . ?
S2 Pd3 Pd2 51.71(2) . . ?
N3 Pd3 Pd1 135.86(6) . . ?
N4 Pd3 Pd1 138.92(6) . . ?
S1 Pd3 Pd1 44.748(17) . . ?
S2 Pd3 Pd1 45.255(17) . . ?
Pd2 Pd3 Pd1 64.237(13) . . ?
Pd1 S1 Pd3 89.80(3) . . ?
Pd1 S1 Pd2 90.71(3) . . ?
Pd3 S1 Pd2 77.05(2) . . ?
F4 P1 F1 179.19(11) . . ?
F4 P1 F5 89.95(11) . . ?
F1 P1 F5 90.82(12) . . ?
F4 P1 F3 90.05(10) . . ?
F1 P1 F3 89.68(11) . . ?
F5 P1 F3 90.67(11) . . ?
F4 P1 F6 90.15(10) . . ?
F1 P1 F6 90.10(11) . . ?
F5 P1 F6 90.42(11) . . ?
F3 P1 F6 178.89(12) . . ?
F4 P1 F2 89.70(10) . . ?
F1 P1 F2 89.53(11) . . ?
F5 P1 F2 179.55(11) . . ?
F3 P1 F2 89.61(10) . . ?
F6 P1 F2 89.30(10) . . ?
C20 N2 C24 119.6(2) . . ?
C20 N2 Pd1 126.21(17) . . ?
C24 N2 Pd1 114.13(15) . . ?
C13 N6 C12 119.8(2) . . ?
C13 N6 Pd2 126.24(17) . . ?
C12 N6 Pd2 113.51(16) . . ?
C19 N5 C15 119.7(2) . . ?
C19 N5 Pd2 125.76(18) . . ?
C15 N5 Pd2 114.15(16) . . ?
C29 N1 C25 119.1(2) . . ?
C29 N1 Pd1 126.01(16) . . ?
C25 N1 Pd1 114.89(16) . . ?
N2 C24 C23 120.6(2) . . ?
N2 C24 C25 116.0(2) . . ?
C23 C24 C25 123.4(2) . . ?
C1 N4 C5 119.9(2) . . ?
C1 N4 Pd3 125.86(18) . . ?
C5 N4 Pd3 113.69(16) . . ?
N5 C15 C16 120.8(2) . . ?
N5 C15 C12 115.7(2) . . ?
C16 C15 C12 123.6(2) . . ?
N3 C6 C7 120.7(2) . . ?
N3 C6 C5 115.3(2) . . ?
C7 C6 C5 124.0(2) . . ?
C3 C4 C5 119.3(3) . . ?
C3 C4 H4 120.3 . . ?
C5 C4 H4 120.3 . . ?
N1 C25 C26 120.7(2) . . ?
N1 C25 C24 115.2(2) . . ?
C26 C25 C24 124.0(2) . . ?
C10 N3 C6 119.6(2) . . ?
C10 N3 Pd3 125.62(18) . . ?
C6 N3 Pd3 114.60(16) . . ?
N6 C12 C11 120.6(2) . . ?
N6 C12 C15 115.5(2) . . ?
C11 C12 C15 123.9(2) . . ?
C3 C2 C1 119.5(3) . . ?
C3 C2 H2 120.3 . . ?
C1 C2 H2 120.3 . . ?
C30 C11 C12 119.5(3) . . ?
C30 C11 H11 120.3 . . ?
C12 C11 H11 120.3 . . ?
C26 C27 C28 119.0(3) . . ?
C26 C27 H27 120.5 . . ?
C28 C27 H27 120.5 . . ?
C29 C28 C27 119.0(2) . . ?
C29 C28 H28 120.5 . . ?
C27 C28 H28 120.5 . . ?
C9 C8 C7 119.3(3) . . ?
C9 C8 H8 120.4 . . ?
C7 C8 H8 120.4 . . ?
N6 C13 C14 122.0(2) . . ?
N6 C13 H13 119.0 . . ?
C14 C13 H13 119.0 . . ?
N2 C20 C21 122.1(3) . . ?
N2 C20 H20 119.0 . . ?
C21 C20 H20 119.0 . . ?
N4 C5 C4 120.4(2) . . ?
N4 C5 C6 115.4(2) . . ?
C4 C5 C6 124.1(2) . . ?
C17 C18 C19 119.1(3) . . ?
C17 C18 H18 120.5 . . ?
C19 C18 H18 120.5 . . ?
N4 C1 C2 121.5(3) . . ?
N4 C1 H1 119.2 . . ?
C2 C1 H1 119.2 . . ?
C30 C14 C13 119.0(3) . . ?
C30 C14 H14 120.5 . . ?
C13 C14 H14 120.5 . . ?
C22 C21 C20 118.7(3) . . ?
C22 C21 H21 120.7 . . ?
C20 C21 H21 120.7 . . ?
C2 C3 C4 119.3(3) . . ?
C2 C3 H3 120.4 . . ?
C4 C3 H3 120.4 . . ?
N3 C10 C9 122.0(3) . . ?
N3 C10 H10 119.0 . . ?
C9 C10 H10 119.0 . . ?
C17 C16 C15 119.3(3) . . ?
C17 C16 H16 120.4 . . ?
C15 C16 H16 120.4 . . ?
C27 C26 C25 119.8(2) . . ?
C27 C26 H26 120.1 . . ?
C25 C26 H26 120.1 . . ?
C8 C9 C10 119.1(3) . . ?
C8 C9 H9 120.5 . . ?
C10 C9 H9 120.5 . . ?
C18 C17 C16 119.4(3) . . ?
C18 C17 H17 120.3 . . ?
C16 C17 H17 120.3 . . ?
C8 C7 C6 119.4(3) . . ?
C8 C7 H7 120.3 . . ?
C6 C7 H7 120.3 . . ?
N5 C19 C18 121.7(3) . . ?
N5 C19 H19 119.1 . . ?
C18 C19 H19 119.1 . . ?
C21 C22 C23 119.9(2) . . ?
C21 C22 H22 120.1 . . ?
C23 C22 H22 120.1 . . ?
C22 C23 C24 119.1(3) . . ?
C22 C23 H23 120.4 . . ?
C24 C23 H23 120.4 . . ?
F9 P2 F8 91.17(17) . . ?
F9 P2 F10 91.15(16) . . ?
F8 P2 F10 177.64(17) . . ?
F9 P2 F11 178.82(17) . . ?
F8 P2 F11 90.00(16) . . ?
F10 P2 F11 87.68(16) . . ?
F9 P2 F7 89.03(12) . . ?
F8 P2 F7 90.10(12) . . ?
F10 P2 F7 89.49(11) . . ?
F11 P2 F7 90.90(12) . . ?
F9 P2 F12 91.49(12) . . ?
F8 P2 F12 90.93(12) . . ?
F10 P2 F12 89.46(11) . . ?
F11 P2 F12 88.57(11) . . ?
F7 P2 F12 178.84(11) . . ?
Pd1 S2 Pd2 89.86(2) . . ?
Pd1 S2 Pd3 88.75(2) . . ?
Pd2 S2 Pd3 76.36(2) . . ?
N1 C29 C28 122.3(2) . . ?
N1 C29 H29 118.9 . . ?
C28 C29 H29 118.9 . . ?
C14 C30 C11 119.2(3) . . ?
C14 C30 H30 120.4 . . ?
C11 C30 H30 120.4 . . ?
 
loop_
 _geom_torsion_atom_site_label_1
 _geom_torsion_atom_site_label_2
 _geom_torsion_atom_site_label_3
 _geom_torsion_atom_site_label_4
 _geom_torsion
 _geom_torsion_site_symmetry_1
 _geom_torsion_site_symmetry_2
 _geom_torsion_site_symmetry_3
 _geom_torsion_site_symmetry_4
 _geom_torsion_publ_flag
C20 N2 C24 C23 -0.8(4) . . . . ?
Pd1 N2 C24 C23 178.1(2) . . . . ?
C20 N2 C24 C25 179.9(2) . . . . ?
Pd1 N2 C24 C25 -1.2(3) . . . . ?
C19 N5 C15 C16 1.2(3) . . . . ?
Pd2 N5 C15 C16 174.57(19) . . . . ?
C19 N5 C15 C12 -179.3(2) . . . . ?
Pd2 N5 C15 C12 -5.9(3) . . . . ?
C29 N1 C25 C26 0.5(3) . . . . ?
Pd1 N1 C25 C26 179.60(18) . . . . ?
C29 N1 C25 C24 -179.8(2) . . . . ?
Pd1 N1 C25 C24 -0.7(3) . . . . ?
N2 C24 C25 N1 1.2(3) . . . . ?
C23 C24 C25 N1 -178.0(2) . . . . ?
N2 C24 C25 C26 -179.1(2) . . . . ?
C23 C24 C25 C26 1.7(4) . . . . ?
C7 C6 N3 C10 0.0(3) . . . . ?
C5 C6 N3 C10 -179.6(2) . . . . ?
C7 C6 N3 Pd3 -174.80(18) . . . . ?
C5 C6 N3 Pd3 5.6(2) . . . . ?
C13 N6 C12 C11 1.8(3) . . . . ?
Pd2 N6 C12 C11 -170.82(19) . . . . ?
C13 N6 C12 C15 -178.3(2) . . . . ?
Pd2 N6 C12 C15 9.0(3) . . . . ?
N5 C15 C12 N6 -2.1(3) . . . . ?
C16 C15 C12 N6 177.4(2) . . . . ?
N5 C15 C12 C11 177.7(2) . . . . ?
C16 C15 C12 C11 -2.8(4) . . . . ?
N6 C12 C11 C30 -1.7(4) . . . . ?
C15 C12 C11 C30 178.5(2) . . . . ?
C26 C27 C28 C29 -0.7(4) . . . . ?
C12 N6 C13 C14 -0.3(4) . . . . ?
Pd2 N6 C13 C14 171.33(19) . . . . ?
C24 N2 C20 C21 0.8(4) . . . . ?
Pd1 N2 C20 C21 -177.94(19) . . . . ?
C1 N4 C5 C4 -1.9(3) . . . . ?
Pd3 N4 C5 C4 170.48(19) . . . . ?
C1 N4 C5 C6 178.7(2) . . . . ?
Pd3 N4 C5 C6 -8.9(3) . . . . ?
C3 C4 C5 N4 1.6(4) . . . . ?
C3 C4 C5 C6 -179.1(2) . . . . ?
N3 C6 C5 N4 2.2(3) . . . . ?
C7 C6 C5 N4 -177.3(2) . . . . ?
N3 C6 C5 C4 -177.1(2) . . . . ?
C7 C6 C5 C4 3.3(4) . . . . ?
C5 N4 C1 C2 0.6(4) . . . . ?
Pd3 N4 C1 C2 -170.79(19) . . . . ?
C3 C2 C1 N4 1.0(4) . . . . ?
N6 C13 C14 C30 -1.3(4) . . . . ?
N2 C20 C21 C22 -0.2(4) . . . . ?
C1 C2 C3 C4 -1.2(4) . . . . ?
C5 C4 C3 C2 0.0(4) . . . . ?
C6 N3 C10 C9 0.9(4) . . . . ?
Pd3 N3 C10 C9 175.1(2) . . . . ?
N5 C15 C16 C17 -0.8(4) . . . . ?
C12 C15 C16 C17 179.7(2) . . . . ?
C28 C27 C26 C25 0.5(4) . . . . ?
N1 C25 C26 C27 -0.4(4) . . . . ?
C24 C25 C26 C27 180.0(2) . . . . ?
C7 C8 C9 C10 0.7(4) . . . . ?
N3 C10 C9 C8 -1.2(4) . . . . ?
C19 C18 C17 C16 -0.2(4) . . . . ?
C15 C16 C17 C18 0.4(4) . . . . ?
C9 C8 C7 C6 0.1(4) . . . . ?
N3 C6 C7 C8 -0.5(4) . . . . ?
C5 C6 C7 C8 179.0(2) . . . . ?
C15 N5 C19 C18 -1.1(4) . . . . ?
Pd2 N5 C19 C18 -173.6(2) . . . . ?
C17 C18 C19 N5 0.6(4) . . . . ?
C20 C21 C22 C23 -0.5(5) . . . . ?
C21 C22 C23 C24 0.5(5) . . . . ?
N2 C24 C23 C22 0.1(4) . . . . ?
C25 C24 C23 C22 179.3(3) . . . . ?
C25 N1 C29 C28 -0.8(4) . . . . ?
Pd1 N1 C29 C28 -179.8(2) . . . . ?
C27 C28 C29 N1 0.9(4) . . . . ?
C13 C14 C30 C11 1.4(4) . . . . ?
C12 C11 C30 C14 0.1(4) . . . . ?
 
_refine_diff_density_max    1.042
_refine_diff_density_min   -0.593
_refine_diff_density_rms    0.076

# SQUEEZE RESULTS (APPEND TO CIF)
# Note: Data are Listed for all Voids in the P1 Unit Cell
# i.e. Centre of Gravity, Solvent Accessible Volume,
# Recovered number of Electrons in the Void and
# Details about the Squeezed Material
loop_
  _platon_squeeze_void_nr
  _platon_squeeze_void_average_x
  _platon_squeeze_void_average_y
  _platon_squeeze_void_average_z
  _platon_squeeze_void_volume
  _platon_squeeze_void_count_electrons
  _platon_squeeze_void_content
   1  0.250  0.086  0.250       495       116 ' '
   2 -0.250  0.061  0.750       495       116 ' '
_platon_squeeze_details                           ?

_shelxl_version_number 2014-3

_shelx_res_file
;
TITL jxf11 in P2(1)/n
CELL 0.71073  14.2440  11.9400  26.9890  90.000 103.366  90.000
ZERR    8.00   0.0028   0.0024   0.0054   0.000   0.030   0.000
LATT 1
SYMM 0.5-X, 0.5+Y, 0.5-Z
SFAC C  H  N  F  P  S  Pd
UNIT 128 184 32 24 16 16 16
L.S. 10
ACTA
BOND $h
FMAP 2
PLAN 20
conf
size 0.1 0.2 0.15
FREE H14  Q14
FREE C13  Q14
FREE F11  F8
WGHT    0.031500    4.199300
FVAR       0.51297
MOLE 1
PD1   7    0.768677    0.223230    1.034842    11.00000    0.03428    0.02413 =
         0.01698   -0.00292    0.00433   -0.00102
PD2   7    0.848670    0.000737    0.989534    11.00000    0.03113    0.02389 =
         0.01730   -0.00154    0.00341   -0.00328
PD3   7    0.648022    0.004691    0.988726    11.00000    0.03224    0.02283 =
         0.01751   -0.00059    0.00522    0.00191
S1    6    0.737019    0.136532    0.958260    11.00000    0.04410    0.02235 =
         0.01714   -0.00084    0.00432   -0.00110
P1    5    0.662073    0.276939    0.808508    11.00000    0.04323    0.04332 =
         0.02730    0.00733    0.00807    0.00175
N2    3    0.796385    0.301839    1.105101    11.00000    0.02469    0.03556 =
         0.02131   -0.00446    0.00467   -0.00102
N6    3    0.931886   -0.137185    1.015661    11.00000    0.02663    0.02944 =
         0.02444    0.00085    0.00179   -0.00328
N5    3    0.892669   -0.041690    0.924914    11.00000    0.02727    0.03274 =
         0.02258   -0.00253    0.00496   -0.00685
N1    3    0.757573    0.388746    1.012315    11.00000    0.02788    0.02692 =
         0.02345   -0.00527    0.00466   -0.00069
F2    4    0.560578    0.242291    0.771293    11.00000    0.04844    0.05097 =
         0.03395    0.00222    0.00324    0.00114
C24   1    0.793102    0.415257    1.102532    11.00000    0.02632    0.03212 =
         0.02430   -0.00784    0.00442   -0.00045
N4    3    0.583333   -0.131167    1.013780    11.00000    0.03075    0.03000 =
         0.02540    0.00141    0.00919    0.00363
F1    4    0.714174    0.257694    0.762819    11.00000    0.06296    0.08497 =
         0.04274    0.00798    0.02631    0.00747
C15   1    0.939650   -0.140062    0.927993    11.00000    0.02289    0.03708 =
         0.02904   -0.00427    0.00556   -0.00454
C6    1    0.497582   -0.128975    0.926121    11.00000    0.02570    0.03075 =
         0.03143   -0.00147    0.00956    0.00387
C4    1    0.481043   -0.288341    0.985510    11.00000    0.03196    0.03707 =
         0.04738    0.00258    0.00866   -0.00362
AFIX  43
H4    2    0.438913   -0.326351    0.959473    11.00000   -1.20000
AFIX   0
C25   1    0.772542    0.463959    1.050904    11.00000    0.02254    0.03506 =
         0.02833   -0.00647    0.00519   -0.00080
N3    3    0.545675   -0.032472    0.923953    11.00000    0.02962    0.02806 =
         0.02328   -0.00071    0.00644    0.00562
C12   1    0.960123   -0.194793    0.978405    11.00000    0.02514    0.03511 =
         0.03096   -0.00095    0.00569   -0.00367
C2    1    0.568468   -0.275485    1.072077    11.00000    0.04722    0.04186 =
         0.03745    0.01211    0.01405    0.00167
AFIX  43
H2    2    0.584824   -0.303905    1.105036    11.00000   -1.20000
AFIX   0
C11   1    1.004934   -0.298433    0.988489    11.00000    0.03682    0.04248 =
         0.04353    0.00134    0.01456    0.00519
AFIX  43
H11   2    1.022650   -0.338607    0.962566    11.00000   -1.20000
AFIX   0
C27   1    0.748123    0.615779    0.991409    11.00000    0.04656    0.02845 =
         0.04331    0.00095    0.00881   -0.00135
AFIX  43
H27   2    0.745247    0.692121    0.984385    11.00000   -1.20000
AFIX   0
C28   1    0.732750    0.538442    0.952259    11.00000    0.04983    0.03317 =
         0.03054    0.00263    0.00783    0.00080
AFIX  43
H28   2    0.718659    0.561969    0.918498    11.00000   -1.20000
AFIX   0
C8    1    0.414850   -0.108510    0.838557    11.00000    0.03888    0.05266 =
         0.03062   -0.00720   -0.00315   -0.00011
AFIX  43
H8    2    0.370858   -0.134167    0.809773    11.00000   -1.20000
AFIX   0
C13   1    0.949582   -0.178849    1.062975    11.00000    0.03455    0.03805 =
         0.02762    0.00206    0.00295   -0.00308
AFIX  43
H13   2    0.930129   -0.138352    1.088290    11.00000   -1.20000
AFIX   0
C20   1    0.814736    0.251325    1.150514    11.00000    0.03398    0.03904 =
         0.02506   -0.00224    0.00605    0.00029
AFIX  43
H20   2    0.817671    0.173542    1.151863    11.00000   -1.20000
AFIX   0
C5    1    0.519822   -0.185666    0.976032    11.00000    0.02579    0.03360 =
         0.03053    0.00139    0.00978    0.00324
C18   1    0.895409   -0.027438    0.837294    11.00000    0.04252    0.05647 =
         0.02337    0.00083    0.00814   -0.00260
AFIX  43
H18   2    0.879697    0.012287    0.806856    11.00000   -1.20000
AFIX   0
C1    1    0.606780   -0.174849    1.060753    11.00000    0.03951    0.03798 =
         0.02859    0.00354    0.01295    0.00491
AFIX  43
H1    2    0.649808   -0.136614    1.086328    11.00000   -1.20000
AFIX   0
C14   1    0.995955   -0.280373    1.075330    11.00000    0.03945    0.04395 =
         0.03666    0.01237    0.00541    0.00422
AFIX  43
H14   2    1.008675   -0.307000    1.108599    11.00000   -1.20000
AFIX   0
C21   1    0.829472    0.310920    1.195482    11.00000    0.04057    0.05737 =
         0.01958   -0.00365    0.00303    0.00423
AFIX  43
H21   2    0.841964    0.274040    1.226672    11.00000   -1.20000
AFIX   0
C3    1    0.505845   -0.333327    1.034121    11.00000    0.04270    0.03893 =
         0.05996    0.01542    0.01863   -0.00070
AFIX  43
H3    2    0.480511   -0.401799    1.041057    11.00000   -1.20000
AFIX   0
C10   1    0.529613    0.025476    0.880111    11.00000    0.03733    0.03635 =
         0.02539    0.00226    0.00718    0.00307
AFIX  43
H10   2    0.563721    0.091408    0.878808    11.00000   -1.20000
AFIX   0
C16   1    0.966780   -0.184552    0.885790    11.00000    0.03617    0.04694 =
         0.03777   -0.00561    0.01172    0.00208
AFIX  43
H16   2    0.999976   -0.252153    0.888275    11.00000   -1.20000
AFIX   0
C26   1    0.767772    0.578123    1.040996    11.00000    0.03757    0.03132 =
         0.03510   -0.01224    0.00702   -0.00257
AFIX  43
H26   2    0.777815    0.629092    1.067762    11.00000   -1.20000
AFIX   0
C9    1    0.464014   -0.009925    0.836959    11.00000    0.04316    0.04772 =
         0.02642    0.00133    0.00255    0.00288
AFIX  43
H9    2    0.453206    0.032290    0.807219    11.00000   -1.20000
AFIX   0
C17   1    0.943861   -0.127176    0.840071    11.00000    0.04245    0.06442 =
         0.03078   -0.00857    0.01289    0.00074
AFIX  43
H17   2    0.961199   -0.156064    0.811449    11.00000   -1.20000
AFIX   0
C7    1    0.431546   -0.169119    0.883455    11.00000    0.03154    0.04049 =
         0.03963   -0.00352    0.00325   -0.00252
AFIX  43
H7    2    0.398978   -0.236018    0.885120    11.00000   -1.20000
AFIX   0
C19   1    0.870176    0.013365    0.880407    11.00000    0.03654    0.04072 =
         0.02495   -0.00138    0.00590   -0.00513
AFIX  43
H19   2    0.836745    0.080725    0.878486    11.00000   -1.20000
AFIX   0
C22   1    0.825311    0.425841    1.193230    11.00000    0.05427    0.05378 =
         0.02401   -0.01459    0.00192    0.00391
AFIX  43
H22   2    0.834518    0.467594    1.223056    11.00000   -1.20000
AFIX   0
C23   1    0.807439    0.479186    1.146615    11.00000    0.05013    0.03893 =
         0.03190   -0.01113    0.00062    0.00226
AFIX  43
H23   2    0.805033    0.556946    1.144760    11.00000   -1.20000
AFIX   0
MOLE 2
P2    5    0.840414    0.796091    0.198528    11.00000    0.04154    0.03344 =
         0.02249   -0.00432    0.00659   -0.00249
F12   4    0.808242    0.768421    0.139178    11.00000    0.08355    0.05237 =
         0.02375   -0.00746    0.00238   -0.00075
F9    4    0.758128    0.884646    0.194029    11.00000    0.09071    0.09488 =
         0.07473   -0.02621   -0.00462    0.05124
F11   4    0.922722    0.704073    0.203394    11.00000    0.07472    0.09116 =
         0.07219   -0.02737   -0.01176    0.03670
F7    4    0.872018    0.821195    0.258062    11.00000    0.10536    0.04969 =
         0.02560   -0.00903    0.00544   -0.01008
F10   4    0.771306    0.699444    0.209526    11.00000    0.12599    0.07689 =
         0.07174   -0.03394    0.05951   -0.05611
F8    4    0.912173    0.888005    0.188324    11.00000    0.13221    0.08691 =
         0.07183   -0.03078    0.05633   -0.06677
S2    6    0.777752    0.038003    1.056335    11.00000    0.04134    0.02761 =
         0.01662   -0.00066    0.00442   -0.00024
F4    4    0.608563    0.296314    0.853612    11.00000    0.06378    0.05602 =
         0.03129    0.00113    0.01552    0.00323
F3    4    0.642545    0.404541    0.791358    11.00000    0.07478    0.04213 =
         0.05442    0.01251    0.01309   -0.00408
F6    4    0.679892    0.148582    0.824798    11.00000    0.06793    0.04674 =
         0.04434    0.01152    0.01029    0.01503
F5    4    0.762399    0.310768    0.845739    11.00000    0.05123    0.08469 =
         0.05282    0.00401   -0.00096   -0.00994
C29   1    0.738599    0.426125    0.963971    11.00000    0.04288    0.03226 =
         0.02429   -0.00320    0.00565   -0.00052
AFIX  43
H29   2    0.729116    0.374250    0.937575    11.00000   -1.20000
AFIX   0
C30   1    1.023017   -0.341462    1.037546    11.00000    0.03838    0.03996 =
         0.05524    0.01173    0.01266    0.00836
AFIX  43
H30   2    1.053018   -0.410644    1.044856    11.00000   -1.20000
AFIX   0
HKLF 4

REM  jxf11 in P2(1)/n
REM R1 =  0.0254 for    8180 Fo > 4sig(Fo)  and  0.0290 for all    9142 data
REM    496 parameters refined using      0 restraints

END

WGHT      0.0306      4.3109

REM Highest difference peak  1.042,  deepest hole -0.593,  1-sigma level  0.076
Q1    1   0.7670  0.7788  1.0348  11.00000  0.05    1.04
Q2    1   0.8496  0.6812  0.2125  11.00000  0.05    0.66
Q3    1   0.8305  0.9212  0.1798  11.00000  0.05    0.64
Q4    1   0.7224  0.7997  0.1913  11.00000  0.05    0.61
Q5    1   0.9408  0.7920  0.2001  11.00000  0.05    0.55
Q6    1   0.7254  0.2202  0.9425  11.00000  0.05    0.44
Q7    1   0.4455 -0.1385  0.9074  11.00000  0.05    0.34
Q8    1   0.9491 -0.1634  0.9062  11.00000  0.05    0.31
Q9    1   0.4335 -0.2236  0.9689  11.00000  0.05    0.31
Q10   1   0.7760  0.3323  1.0333  11.00000  0.05    0.29
Q11   1   0.6477  0.0003  1.0347  11.00000  0.05    0.28
Q12   1   1.0187 -0.2932  1.0529  11.00000  0.05    0.28
Q13   1   0.5786 -0.2218  1.0497  11.00000  0.05    0.27
Q14   1   0.6671  0.7505  0.8524  11.00000  0.05    0.27
Q15   1   0.5614 -0.5029  1.1592  11.00000  0.05    0.27
Q16   1   0.6545 -0.1621  1.0091  11.00000  0.05    0.27
Q17   1   0.5401 -0.0929  0.9183  11.00000  0.05    0.27
Q18   1   0.6969  0.7914  0.8904  11.00000  0.05    0.26
Q19   1   0.5467  0.0019  1.0143  11.00000  0.05    0.26
Q20   1   0.5451 -0.0141  0.9045  11.00000  0.05    0.26
;
_shelx_res_checksum   92137

_shelx_hkl_file
;
  -2   0   0   35564     789                                                       27246   45.26    0.01  1.0000
  -2   0   0   37267     769                                                       28739   45.26    0.01  1.0000
   2   0   0   36910     790                                                       28426   45.26   -0.01  1.0000
  -4   0   0    2178      25                                                         788  -35.80    0.03  1.0000
  -4   0   0    2223      25                                                         815  -35.80    0.03  1.0000
   4   0   0    2083      24                                                         731  -35.80   -0.03  1.0000
   4   0   0    2118      25                                                         752  -35.80   -0.03  1.0000
  -6   0   0      35       6                                                          38  -21.94   -0.06  1.0000
  -6   0   0      47       4                                                          25  -21.94   -0.06  1.0000
   6   0   0      34       5                                                          39  -21.94    0.06  1.0000
   6   0   0      58       4                                                          17  -21.94    0.06  1.0000
  -8   0   0    4779      96                                                        3246  -23.39   -0.02  1.0000
  -8   0   0    4698      94                                                        3180  -23.39   -0.02  1.0000
   8   0   0    4696      96                                                        3178  -23.39    0.02  1.0000
   8   0   0    4637      92                                                        3130  -23.39    0.02  1.0000
 -10   0   0   15123     434                                                       15524   -3.12    0.04  1.0000
 -10   0   0   14960     423                                                       15358   -3.12    0.04  1.0000
  10   0   0   14641     420                                                       15036   -3.12   -0.04  1.0000
  10   0   0   14992     433                                                       15391   -3.12   -0.04  1.0000
 -12   0   0    1972      66                                                        1988    0.35    0.00  1.0000
 -12   0   0    1922      66                                                        1938    0.35    0.00  1.0000
  12   0   0    1923      65                                                        1939    0.35    0.00  1.0000
  12   0   0    1869      62                                                        1885    0.35    0.00  1.0000
 -14   0   0    1780      65                                                        1817    0.83   -0.01  1.0000
 -14   0   0    1758      66                                                        1794    0.83   -0.01  1.0000
  14   0   0    1757      60                                                        1793    0.83    0.01  1.0000
 -16   0   0    1397      59                                                        1378    0.48    0.01  1.0000
 -16   0   0    1334      57                                                        1316    0.48    0.01  1.0000
  16   0   0    1406      56                                                        1387    0.48   -0.01  1.0000
  16   0   0    1406      52                                                        1387    0.48   -0.01  1.0000
 -17   1   0       0      16                                                          -5   -0.90    0.00  1.0000
 -17   1   0      23      19                                                          19   -0.90    0.00  1.0000
  16  -1   0      58      16                                                          65    0.84    0.00  1.0000
  16  -1   0      35      14                                                          40    0.84    0.00  1.0000
 -16   1   0      30      16                                                          35    0.84    0.00  1.0000
 -16   1   0      67      19                                                          74    0.84    0.00  1.0000
  15  -1   0      43      12                                                          34    1.35    0.01  1.0000
  15  -1   0      47      13                                                          38    1.35    0.01  1.0000
 -15   1   0      58      17                                                          48    1.35   -0.01  1.0000
 -15   1   0      43      13                                                          34    1.35   -0.01  1.0000
  14  -1   0     218      21                                                         218   -0.01    0.00  1.0000
 -14   1   0     253      27                                                         253   -0.01    0.00  1.0000
 -14   1   0     216      23                                                         216   -0.01    0.00  1.0000
  13  -1   0      80      16                                                         128    4.52    0.00  1.0000
  13  -1   0      70      16                                                         115    4.52    0.00  1.0000
 -13   1   0      93      20                                                         144    4.52    0.00  1.0000
 -13   1   0      80      17                                                         128    4.52    0.00  1.0000
  12  -1   0      31       8                                                          21   -1.86   -0.01  1.0000
  12  -1   0      25       7                                                          16   -1.86   -0.01  1.0000
 -12   1   0      34       8                                                          24   -1.86    0.01  1.0000
 -12   1   0      29       7                                                          20   -1.86    0.01  1.0000
  11  -1   0     117      14                                                         124   -0.59   -0.05  1.0000
  11  -1   0     128      14                                                         135   -0.59   -0.05  1.0000
 -11   1   0     147      15                                                         155   -0.59    0.05  1.0000
 -11   1   0     126      15                                                         133   -0.59    0.05  1.0000
  10  -1   0    2433      74                                                        2309    2.45    0.03  1.0000
  10  -1   0    2313      70                                                        2192    2.45    0.03  1.0000
 -10   1   0    2434      75                                                        2310    2.45   -0.03  1.0000
 -10   1   0    2442      73                                                        2318    2.45   -0.03  1.0000
   9  -1   0      19       4                                                          -2   -8.47   -0.04  1.0000
   9  -1   0      19       5                                                           0   -8.47   -0.04  1.0000
  -9   1   0      38       5                                                           3   -8.47    0.04  1.0000
  -9   1   0      19       5                                                           0   -8.47    0.04  1.0000
   8  -1   0    3420     105                                                        3493    1.19   -0.01  1.0000
   8  -1   0    3610     108                                                        3684    1.19   -0.01  1.0000
  -8   1   0    3571     109                                                        3645    1.19    0.01  1.0000
  -8   1   0    3563     106                                                        3637    1.19    0.01  1.0000
   7  -1   0       6       3                                                           3   -7.74    0.05  1.0000
   7  -1   0       3       4                                                           6   -7.74    0.05  1.0000
  -7   1   0      16       3                                                          -1   -7.74   -0.05  1.0000
  -7   1   0       3       4                                                           7   -7.74   -0.05  1.0000
   6  -1   0     595      19                                                         515    3.28   -0.01  1.0000
   6  -1   0     582      20                                                         503    3.28   -0.01  1.0000
  -6   1   0     612      20                                                         531    3.28    0.01  1.0000
  -6   1   0     583      21                                                         504    3.28    0.01  1.0000
   5  -1   0    1710      62                                                        2015   -6.79   -0.02  1.0000
   5  -1   0    1867      64                                                        2185   -6.79   -0.02  1.0000
  -5   1   0    1848      65                                                        2164   -6.79    0.02  1.0000
  -5   1   0    1791      63                                                        2102   -6.79    0.02  1.0000
   4  -1   0    4340     190                                                        6873   32.76   -0.04  1.0000
   4  -1   0    3870     184                                                        6279   32.76   -0.04  1.0000
  -4   1   0    4138     190                                                        6618   32.76    0.04  1.0000
  -4   1   0    4485     185                                                        7056   32.76    0.04  1.0000
   3  -1   0    1560      32                                                        1108   11.95    0.03  1.0000
   3  -1   0    1520      33                                                        1074   11.95    0.03  1.0000
  -3   1   0    1481      33                                                        1041   11.95   -0.03  1.0000
  -3   1   0    1495      34                                                        1053   11.95   -0.03  1.0000
   2  -1   0   13990     230                                                        7966  -55.84    0.01  1.0000
   2  -1   0   14281     234                                                        8186  -55.84    0.01  1.0000
  -2   1   0   15109     231                                                        8816  -55.84   -0.01  1.0000
  -2   1   0   14542     236                                                        8384  -55.84   -0.01  1.0000
  -1   1   0       6       3                                                          52    9.09    0.04  1.0000
  -1   1   0       8       3                                                          57    9.09    0.04  1.0000
  -1  -1   0       7       3                                                          54    9.11    0.04  1.0000
  -2  -1   0   15634     255                                                        9217   55.84   -0.02  1.0000
   2   1   0   15494     261                                                        9110   55.84    0.02  1.0000
  -3  -1   0    1679      35                                                        1209   11.94    0.01  1.0000
  -3  -1   0    1581      34                                                        1126   11.94    0.01  1.0000
   3   1   0    1562      34                                                        1110   11.94   -0.01  1.0000
  -4  -1   0    4348     189                                                        6885  -32.77    0.07  1.0000
  -4  -1   0    4353     194                                                        6891  -32.77    0.07  1.0000
   4   1   0    4327     193                                                        6858  -32.77   -0.07  1.0000
  -5  -1   0    1938      64                                                        2261   -6.79   -0.04  1.0000
  -5  -1   0    1918      66                                                        2239   -6.79   -0.04  1.0000
   5   1   0    1849      64                                                        2165   -6.79    0.04  1.0000
   5   1   0    1883      66                                                        2202   -6.79    0.04  1.0000
  -6  -1   0     613      20                                                         532   -3.27    0.02  1.0000
  -6  -1   0     604      19                                                         523   -3.27    0.02  1.0000
   6   1   0     594      19                                                         514   -3.27   -0.02  1.0000
   6   1   0     606      20                                                         525   -3.27   -0.02  1.0000
  -7  -1   0       2       4                                                           9   -7.73    0.05  1.0000
  -7  -1   0      16       3                                                           0   -7.73    0.05  1.0000
   7   1   0       4       3                                                           6   -7.73   -0.05  1.0000
   7   1   0       2       4                                                          12   -7.73   -0.05  1.0000
  -8  -1   0    3656     107                                                        3731   -1.18   -0.02  1.0000
  -8  -1   0    3617     109                                                        3691   -1.18   -0.02  1.0000
   8   1   0    3470     105                                                        3543   -1.18    0.02  1.0000
   8   1   0    3632     108                                                        3706   -1.18    0.02  1.0000
  -9  -1   0      66       5                                                          14   -8.46   -0.05  1.0000
  -9  -1   0      34       4                                                           2   -8.46   -0.05  1.0000
   9   1   0      57       5                                                          10   -8.46    0.05  1.0000
   9   1   0      38       4                                                           3   -8.46    0.05  1.0000
 -10  -1   0    2393      72                                                        2269   -2.46   -0.01  1.0000
 -10  -1   0    2436      74                                                        2311   -2.46   -0.01  1.0000
  10   1   0    2370      69                                                        2247   -2.46    0.01  1.0000
  10   1   0    2463      72                                                        2338   -2.46    0.01  1.0000
 -11  -1   0     118      14                                                         125   -0.59   -0.05  1.0000
 -11  -1   0     141      14                                                         148   -0.59   -0.05  1.0000
  11   1   0     138      12                                                         145   -0.59    0.05  1.0000
  11   1   0     106      13                                                         112   -0.59    0.05  1.0000
 -12  -1   0      35       7                                                          25    1.86    0.00  1.0000
 -12  -1   0      38       8                                                          27    1.86    0.00  1.0000
  12   1   0      29       6                                                          20    1.86    0.00  1.0000
  12   1   0      53       8                                                          40    1.86    0.00  1.0000
 -13  -1   0      68      14                                                         112    4.51   -0.02  1.0000
 -13  -1   0      92      16                                                         143    4.51   -0.02  1.0000
  13   1   0      81      15                                                         129    4.51    0.02  1.0000
  13   1   0     105      17                                                         159    4.51    0.02  1.0000
 -14  -1   0     284      23                                                         284    0.00    0.01  1.0000
 -14  -1   0     259      24                                                         259    0.00    0.01  1.0000
  14   1   0     278      23                                                         278    0.00   -0.01  1.0000
  14   1   0     256      19                                                         256    0.00   -0.01  1.0000
 -15  -1   0      35      13                                                          27    1.35    0.00  1.0000
 -15  -1   0      47      12                                                          38    1.35    0.00  1.0000
  15   1   0      47      10                                                          38    1.35    0.00  1.0000
 -16  -1   0      71      17                                                          78   -0.84    0.00  1.0000
  16   1   0      58      12                                                          65   -0.84    0.00  1.0000
  16   1   0      51      15                                                          57   -0.84    0.00  1.0000
  17   1   0      10      15                                                           7   -0.90    0.01  1.0000
 -17   2   0       0      19                                                         -17   -0.79   -0.01  1.0000
 -17   2   0      20      17                                                          24   -0.79   -0.01  1.0000
  16  -2   0     750      39                                                         720    1.08    0.01  1.0000
  16  -2   0     775      42                                                         744    1.08    0.01  1.0000
 -16   2   0     780      47                                                         749    1.08   -0.01  1.0000
 -16   2   0     734      43                                                         704    1.08   -0.01  1.0000
  15  -2   0       9      12                                                          11   -0.71    0.01  1.0000
  15  -2   0      14      12                                                          17   -0.71    0.01  1.0000
 -15   2   0      17      14                                                          20   -0.71   -0.01  1.0000
 -15   2   0       0      12                                                          -9   -0.71   -0.01  1.0000
  14  -2   0    1170      49                                                        1279    3.00    0.03  1.0000
 -14   2   0    1190      53                                                        1300    3.00   -0.03  1.0000
 -14   2   0    1065      52                                                        1169    3.00   -0.03  1.0000
  13  -2   0       0       8                                                          -2   -0.27   -0.01  1.0000
  13  -2   0       0       7                                                          -8   -0.27   -0.01  1.0000
 -13   2   0       6      10                                                           5   -0.27    0.01  1.0000
 -13   2   0       0       8                                                          -7   -0.27    0.01  1.0000
  12  -2   0      94      11                                                          79    1.51   -0.04  1.0000
  12  -2   0     145      15                                                         127    1.51   -0.04  1.0000
 -12   2   0     129      16                                                         112    1.51    0.04  1.0000
 -12   2   0     108      13                                                          92    1.51    0.04  1.0000
  11  -2   0      35       9                                                          50    2.15    0.02  1.0000
  11  -2   0      35       9                                                          49    2.15    0.02  1.0000
 -11   2   0      26       8                                                          39    2.15   -0.02  1.0000
 -11   2   0      34      10                                                          48    2.15   -0.02  1.0000
  10  -2   0    3598     117                                                        3895   -4.67    0.00  1.0000
  10  -2   0    3458     112                                                        3749   -4.67    0.00  1.0000
 -10   2   0    3575     115                                                        3871   -4.67    0.00  1.0000
 -10   2   0    3430     117                                                        3720   -4.67    0.00  1.0000
   9  -2   0       0       4                                                          -1   -1.34   -0.03  1.0000
   9  -2   0       8       5                                                           5   -1.34   -0.03  1.0000
  -9   2   0       8       5                                                           5   -1.34    0.03  1.0000
  -9   2   0       0       5                                                          -2   -1.34    0.03  1.0000
   8  -2   0     969      27                                                         663  -10.35    0.05  1.0000
   8  -2   0    1104      29                                                         775  -10.35    0.05  1.0000
  -8   2   0    1004      29                                                         692  -10.35   -0.05  1.0000
  -8   2   0    1049      29                                                         729  -10.35   -0.05  1.0000
   7  -2   0    1177      47                                                        1465    7.63    0.00  1.0000
   7  -2   0    1144      48                                                        1428    7.63    0.00  1.0000
  -7   2   0    1175      48                                                        1462    7.63    0.00  1.0000
  -7   2   0    1161      49                                                        1447    7.63    0.00  1.0000
   6  -2   0    9928     173                                                        6065  -41.91    0.14  1.0000
   6  -2   0    9706     168                                                        5892  -41.91    0.14  1.0000
  -6   2   0    9961     174                                                        6090  -41.91   -0.14  1.0000
  -6   2   0    9806     169                                                        5969  -41.91   -0.14  1.0000
   5  -2   0     296      13                                                         253    2.49    0.02  1.0000
   5  -2   0     296      12                                                         253    2.49    0.02  1.0000
  -5   2   0     261      12                                                         221    2.49   -0.02  1.0000
  -5   2   0     266      12                                                         226    2.49   -0.02  1.0000
   4  -2   0   31272     906                                                       31951   -3.67   -0.04  1.0000
   4  -2   0   30803     883                                                       31477   -3.67   -0.04  1.0000
  -4   2   0   31859     884                                                       32544   -3.67    0.04  1.0000
  -4   2   0   30705     908                                                       31378   -3.67    0.04  1.0000
   3  -2   0   12281     272                                                        9325  -27.42   -0.02  1.0000
   3  -2   0   12136     265                                                        9199  -27.42   -0.02  1.0000
  -3   2   0   13448     272                                                       10345  -27.42    0.02  1.0000
  -3   2   0   12922     276                                                        9885  -27.42    0.02  1.0000
   2  -2   0     285      24                                                         731   84.46   -0.08  1.0000
   2  -2   0     342      23                                                         647   84.46   -0.08  1.0000
  -2   2   0     306      24                                                         699   84.46    0.08  1.0000
  -2   2   0     284      23                                                         733   84.46    0.08  1.0000
   1  -2   0    1777      45                                                        1546   -5.45    0.12  1.0000
  -1   2   0    1804      45                                                        1571   -5.45   -0.12  1.0000
   0  -2   0    1657       8                                                         117   57.61    0.02  1.0000
   0   2   0    1607       8                                                         104   57.61   -0.02  1.0000
  -1  -2   0    1953      46                                                        1710    5.46    0.00  1.0000
  -1  -2   0    1755      46                                                        1525    5.46    0.00  1.0000
   1   2   0    1800      45                                                        1567    5.46    0.00  1.0000
   1   2   0    1818      46                                                        1584    5.46    0.00  1.0000
  -2  -2   0     299      22                                                         710   84.47   -0.07  1.0000
   2   2   0     290      22                                                         724   84.47    0.07  1.0000
  -3  -2   0   12904     273                                                        9870   27.41    0.02  1.0000
  -4  -2   0   30285     860                                                       30951   -3.66   -0.04  1.0000
   4   2   0   31156     883                                                       31831   -3.66    0.04  1.0000
  -5  -2   0     262      11                                                         222   -2.49   -0.04  1.0000
   5   2   0     289      11                                                         247   -2.49    0.04  1.0000
  -6  -2   0   10616     175                                                        6605  -41.90    0.08  1.0000
   6   2   0    9752     173                                                        5927  -41.90   -0.08  1.0000
   6   2   0   10299     179                                                        6355  -41.90   -0.08  1.0000
  -7  -2   0    1239      47                                                        1534   -7.64    0.04  1.0000
   7   2   0    1178      47                                                        1466   -7.64   -0.04  1.0000
   7   2   0    1197      45                                                        1488   -7.64   -0.04  1.0000
  -8  -2   0    1026      26                                                         711  -10.34    0.00  1.0000
   8   2   0     991      25                                                         682  -10.34    0.00  1.0000
   8   2   0    1076      27                                                         752  -10.34    0.00  1.0000
  -9  -2   0       7       5                                                           4    1.34    0.09  1.0000
   9   2   0      20       5                                                          14    1.34   -0.09  1.0000
   9   2   0       7       4                                                           4    1.34   -0.09  1.0000
 -10  -2   0    3542     113                                                        3836   -4.66    0.02  1.0000
  10   2   0    3626     115                                                        3924   -4.66   -0.02  1.0000
  10   2   0    3439     110                                                        3729   -4.66   -0.02  1.0000
 -11  -2   0      27       8                                                          40   -2.16    0.00  1.0000
  11   2   0      29       7                                                          42   -2.16    0.00  1.0000
  11   2   0      34       8                                                          48   -2.16    0.00  1.0000
 -12  -2   0     148      15                                                         130    1.51   -0.02  1.0000
  12   2   0     113      12                                                          97    1.51    0.02  1.0000
  12   2   0     123      14                                                         106    1.51    0.02  1.0000
 -13  -2   0       0       8                                                          -5    0.26    0.01  1.0000
  13   2   0       6       7                                                           5    0.26   -0.01  1.0000
  13   2   0       1       6                                                           1    0.26   -0.01  1.0000
 -14  -2   0    1196      51                                                        1306    3.00    0.03  1.0000
  14   2   0    1116      44                                                        1222    3.00   -0.03  1.0000
  14   2   0    1177      48                                                        1286    3.00   -0.03  1.0000
 -15  -2   0       5      12                                                           7    0.71    0.00  1.0000
  15   2   0      16       9                                                          19    0.71    0.00  1.0000
 -16  -2   0     758      41                                                         728    1.07    0.03  1.0000
  16   2   0     728      37                                                         698    1.07   -0.03  1.0000
  17   2   0       0      14                                                         -24    0.79    0.00  1.0000
  16  -3   0     124      20                                                         148   -2.00    0.01  1.0000
 -16   3   0      88      21                                                         109   -2.00   -0.01  1.0000
 -16   3   0     125      23                                                         149   -2.00   -0.01  1.0000
  15  -3   0       0      11                                                          -8    0.88    0.03  1.0000
  15  -3   0       5      12                                                           7    0.88    0.03  1.0000
 -15   3   0       9      13                                                          12    0.88   -0.03  1.0000
 -15   3   0       6      16                                                           8    0.88   -0.03  1.0000
  14  -3   0     175      23                                                         164   -0.81    0.01  1.0000
  14  -3   0     208      24                                                         196   -0.81    0.01  1.0000
 -14   3   0     176      19                                                         165   -0.81   -0.01  1.0000
 -14   3   0     187      26                                                         176   -0.81   -0.01  1.0000
  13  -3   0      16      10                                                          29    2.72    0.02  1.0000
 -13   3   0      10      10                                                          21    2.72   -0.02  1.0000
 -13   3   0      14      12                                                          27    2.72   -0.02  1.0000
  12  -3   0     469      25                                                         473   -0.16    0.01  1.0000
  12  -3   0     455      26                                                         459   -0.16    0.01  1.0000
 -12   3   0     480      27                                                         484   -0.16   -0.01  1.0000
 -12   3   0     444      26                                                         448   -0.16   -0.01  1.0000
  11  -3   0     765      35                                                         826    2.09   -0.02  1.0000
  11  -3   0     844      37                                                         908    2.09   -0.02  1.0000
 -11   3   0     760      37                                                         821    2.09    0.02  1.0000
 -11   3   0     837      38                                                         901    2.09    0.02  1.0000
  10  -3   0     964      39                                                         954   -0.32   -0.01  1.0000
  10  -3   0     965      37                                                         955   -0.32   -0.01  1.0000
 -10   3   0     951      40                                                         941   -0.32    0.01  1.0000
 -10   3   0     986      39                                                         976   -0.32    0.01  1.0000
   9  -3   0    1135      34                                                         866   -8.21    0.00  1.0000
   9  -3   0    1234      36                                                         952   -8.21    0.00  1.0000
  -9   3   0    1159      36                                                         887   -8.21    0.00  1.0000
  -9   3   0    1149      35                                                         878   -8.21    0.00  1.0000
   8  -3   0    1778      44                                                        1318   11.27    0.00  1.0000
   8  -3   0    1767      46                                                        1309   11.27    0.00  1.0000
  -8   3   0    1808      47                                                        1344   11.27    0.00  1.0000
  -8   3   0    1750      46                                                        1294   11.27    0.00  1.0000
   7  -3   0      66      15                                                         267  -15.78   -0.01  1.0000
   7  -3   0      64      16                                                         262  -15.78   -0.01  1.0000
  -7   3   0      57      15                                                         248  -15.78    0.01  1.0000
  -7   3   0      51      16                                                         236  -15.78    0.01  1.0000
   6  -3   0       4      12                                                         147   19.62    0.01  1.0000
   6  -3   0       1      11                                                         122   19.62    0.01  1.0000
  -6   3   0       1      11                                                         101   19.62   -0.01  1.0000
   5  -3   0      24      14                                                         260   21.51    0.00  1.0000
   5  -3   0      24      14                                                         260   21.51    0.00  1.0000
  -5   3   0      25      14                                                         263   21.51    0.00  1.0000
  -5   3   0      29      14                                                         273   21.51    0.00  1.0000
   4  -3   0      40       3                                                           2  -10.48    0.20  1.0000
  -4   3   0      30       3                                                           0  -10.48   -0.20  1.0000
  -4   3   0      37       3                                                           2  -10.48   -0.20  1.0000
   3  -3   0     281       9                                                         152    8.52    0.01  1.0000
   3  -3   0     281       9                                                         152    8.52    0.01  1.0000
  -3   3   0     290      10                                                         159    8.52   -0.01  1.0000
   2  -3   0      48       6                                                          46   26.32   -0.01  1.0000
  -2   3   0      35       6                                                          61   26.32    0.01  1.0000
  -2   3   0      34       6                                                          62   26.32    0.01  1.0000
   1  -3   0    1186      52                                                        1707  -13.24   -0.02  1.0000
  -1   3   0    1228      52                                                        1758  -13.24    0.02  1.0000
  -1   3   0    1291      54                                                        1833  -13.24    0.02  1.0000
  -1  -3   0    1217      52                                                        1744  -13.23    0.01  1.0000
  -1  -3   0    1364      53                                                        1920  -13.23    0.01  1.0000
   1   3   0    1197      52                                                        1720  -13.23   -0.01  1.0000
   1   3   0    1267      52                                                        1804  -13.23   -0.01  1.0000
  -2  -3   0      17       6                                                          92  -26.33   -0.01  1.0000
  -2  -3   0      22       6                                                          82  -26.33   -0.01  1.0000
   2   3   0      37       5                                                          58  -26.33    0.01  1.0000
   2   3   0      37       5                                                          58  -26.33    0.01  1.0000
  -3  -3   0     344       9                                                         199    8.53    0.05  1.0000
   3   3   0     313       8                                                         176    8.53   -0.05  1.0000
   3   3   0     299       9                                                         165    8.53   -0.05  1.0000
  -4  -3   0      43       2                                                           3   10.49   -0.17  1.0000
   4   3   0      53       3                                                          10   10.49    0.17  1.0000
  -5  -3   0       1       9                                                         150   21.51   -0.03  1.0000
   5   3   0       3       9                                                         163   21.51    0.03  1.0000
  -6  -3   0      10      11                                                         177  -19.64    0.03  1.0000
   6   3   0      13      11                                                         187  -19.64   -0.03  1.0000
  -7  -3   0      57      13                                                         247  -15.78   -0.02  1.0000
   7   3   0      62      13                                                         258  -15.78    0.02  1.0000
   7   3   0      34      11                                                         196  -15.78    0.02  1.0000
  -8  -3   0    1838      43                                                        1370  -11.28    0.03  1.0000
   8   3   0    1601      40                                                        1166  -11.28   -0.03  1.0000
   8   3   0    1860      43                                                        1389  -11.28   -0.03  1.0000
  -9  -3   0    1173      32                                                         899   -8.22   -0.03  1.0000
   9   3   0    1202      32                                                         924   -8.22    0.03  1.0000
   9   3   0    1083      30                                                         820   -8.22    0.03  1.0000
 -10  -3   0    1005      36                                                         994    0.32   -0.03  1.0000
  10   3   0     904      32                                                         894    0.32    0.03  1.0000
  10   3   0    1006      35                                                         995    0.32    0.03  1.0000
 -11  -3   0     824      32                                                         888    2.10   -0.01  1.0000
  11   3   0     661      30                                                         718    2.10    0.01  1.0000
  11   3   0     653      29                                                         710    2.10    0.01  1.0000
 -12  -3   0     452      25                                                         456    0.16   -0.03  1.0000
  12   3   0     461      23                                                         465    0.16    0.03  1.0000
 -13  -3   0      19      10                                                          33    2.72    0.02  1.0000
  13   3   0      23       9                                                          38    2.72   -0.02  1.0000
 -14  -3   0     204      23                                                         192    0.80    0.01  1.0000
  14   3   0     261      21                                                         248    0.80   -0.01  1.0000
 -15  -3   0      17      13                                                          21    0.88    0.02  1.0000
 -16  -3   0     103      18                                                         125    2.00   -0.01  1.0000
  16   3   0     119      18                                                         143    2.00    0.01  1.0000
  16  -4   0    1796      70                                                        1769    0.61   -0.02  1.0000
 -16   4   0    1783      73                                                        1756    0.61    0.02  1.0000
 -16   4   0    1864      76                                                        1837    0.61    0.02  1.0000
  15  -4   0      76      18                                                         109   -3.35    0.01  1.0000
  15  -4   0      78      18                                                         112   -3.35    0.01  1.0000
 -15   4   0      86      21                                                         121   -3.35   -0.01  1.0000
 -15   4   0      54      17                                                          82   -3.35   -0.01  1.0000
  14  -4   0    1445      56                                                        1442   -0.07    0.01  1.0000
  14  -4   0    1423      57                                                        1420   -0.07    0.01  1.0000
 -14   4   0    1447      59                                                        1444   -0.07   -0.01  1.0000
 -14   4   0    1315      58                                                        1312   -0.07   -0.01  1.0000
  13  -4   0       8      11                                                          13   -1.45    0.03  1.0000
 -13   4   0      28      11                                                          37   -1.45   -0.03  1.0000
 -13   4   0      33      13                                                          42   -1.45   -0.03  1.0000
  12  -4   0       2       9                                                          -6    2.39    0.03  1.0000
  12  -4   0       2       9                                                           7    2.39    0.03  1.0000
 -12   4   0       2       9                                                          -2    2.39   -0.03  1.0000
 -12   4   0       2       9                                                          -3    2.39   -0.03  1.0000
  11  -4   0      21       8                                                          15    1.35    0.05  1.0000
  11  -4   0      17       8                                                          12    1.35    0.05  1.0000
 -11   4   0       0       8                                                          -5    1.35   -0.05  1.0000
 -11   4   0      20       9                                                          14    1.35   -0.05  1.0000
  10  -4   0    5285     160                                                        5440   -2.04   -0.02  1.0000
  10  -4   0    5404     166                                                        5561   -2.04   -0.02  1.0000
 -10   4   0    5365     162                                                        5521   -2.04    0.02  1.0000
 -10   4   0    5296     167                                                        5451   -2.04    0.02  1.0000
   9  -4   0     223      11                                                          82   11.31   -0.04  1.0000
   9  -4   0     277      14                                                         116   11.31   -0.04  1.0000
  -9   4   0     205      10                                                          71   11.31    0.04  1.0000
  -9   4   0     242      12                                                          94   11.31    0.04  1.0000
   8  -4   0     958      26                                                         556  -14.21    0.05  1.0000
   8  -4   0     887      24                                                         502  -14.21    0.05  1.0000
  -8   4   0     895      26                                                         508  -14.21   -0.05  1.0000
  -8   4   0     970      26                                                         565  -14.21   -0.05  1.0000
   7  -4   0    2525      87                                                        2845   -5.95    0.03  1.0000
   7  -4   0    2413      84                                                        2726   -5.95    0.03  1.0000
  -7   4   0    2408      87                                                        2721   -5.95   -0.03  1.0000
  -7   4   0    2480      85                                                        2798   -5.95   -0.03  1.0000
   6  -4   0   10708     284                                                        9932   -7.35   -0.08  1.0000
   6  -4   0   10213     275                                                        9456   -7.35   -0.08  1.0000
  -6   4   0   10862     277                                                       10081   -7.35    0.08  1.0000
  -6   4   0   10958     284                                                       10173   -7.35    0.08  1.0000
   5  -4   0    1558      41                                                        1133  -11.17    0.01  1.0000
   5  -4   0    1509      39                                                        1092  -11.17    0.01  1.0000
  -5   4   0    1670      41                                                        1229  -11.17   -0.01  1.0000
  -5   4   0    1614      40                                                        1181  -11.17   -0.01  1.0000
   4  -4   0    6336     212                                                        7527  -13.77   -0.01  1.0000
   4  -4   0    5983     206                                                        7142  -13.77   -0.01  1.0000
  -4   4   0    5871     212                                                        7019  -13.77    0.01  1.0000
  -4   4   0    6636     207                                                        7853  -13.77    0.01  1.0000
   3  -4   0    2338      66                                                        2083    5.23    0.07  1.0000
  -3   4   0    2648      67                                                        2376    5.23   -0.07  1.0000
  -3   4   0    2483      69                                                        2220    5.23   -0.07  1.0000
   2  -4   0    9065     213                                                        7700   14.36    0.07  1.0000
  -2   4   0    8986     212                                                        7628   14.36   -0.07  1.0000
  -2   4   0    9009     218                                                        7649   14.36   -0.07  1.0000
  -1   4   0      61       9                                                         179  -10.71   -0.10  1.0000
  -1   4   0      56      10                                                         170  -10.71   -0.10  1.0000
   0  -4   0   38279    1601                                                       56274   79.99    0.03  1.0000
   0   4   0   43453    1610                                                       62512   79.99   -0.03  1.0000
   0   4   0   38732    1603                                                       56823   79.99   -0.03  1.0000
   1   4   0      22       7                                                         106   10.74    0.08  1.0000
   1   4   0      26       8                                                         114   10.74    0.08  1.0000
  -2  -4   0    9244     213                                                        7865   14.36    0.04  1.0000
  -2  -4   0    9031     212                                                        7669   14.36    0.04  1.0000
   2   4   0    8863     212                                                        7514   14.36   -0.04  1.0000
   2   4   0    9151     212                                                        7779   14.36   -0.04  1.0000
  -3  -4   0    2444      65                                                        2184   -5.21   -0.04  1.0000
   3   4   0    2588      65                                                        2320   -5.21    0.04  1.0000
   3   4   0    2426      65                                                        2167   -5.21    0.04  1.0000
  -4  -4   0    6613     212                                                        7827  -13.76   -0.06  1.0000
   4   4   0    6400     212                                                        7595  -13.76    0.06  1.0000
   4   4   0    6420     211                                                        7617  -13.76    0.06  1.0000
  -5  -4   0    1709      40                                                        1263   11.17    0.01  1.0000
   5   4   0    1752      39                                                        1300   11.17   -0.01  1.0000
   5   4   0    1656      39                                                        1217   11.17   -0.01  1.0000
  -6  -4   0   11205     284                                                       10410   -7.36   -0.06  1.0000
   6   4   0   10883     283                                                       10100   -7.36    0.06  1.0000
   6   4   0   11282     292                                                       10485   -7.36    0.06  1.0000
  -7  -4   0    2605      86                                                        2931    5.96    0.04  1.0000
   7   4   0    2662      89                                                        2991    5.96   -0.04  1.0000
  -8  -4   0    1001      23                                                         589  -14.21    0.04  1.0000
   8   4   0     926      22                                                         532  -14.21   -0.04  1.0000
  -9  -4   0     246      11                                                          96  -11.30    0.05  1.0000
   9   4   0     288      12                                                         123  -11.30   -0.05  1.0000
 -10  -4   0    5459     161                                                        5617   -2.04    0.01  1.0000
  10   4   0    5483     164                                                        5641   -2.04   -0.01  1.0000
 -11  -4   0      20       7                                                          14   -1.35   -0.02  1.0000
  11   4   0      19       7                                                          13   -1.35    0.02  1.0000
 -12  -4   0       2       7                                                          -3    2.39    0.03  1.0000
  12   4   0       2       7                                                           7    2.39   -0.03  1.0000
 -13  -4   0      13       9                                                          19    1.46   -0.01  1.0000
  13   4   0      19       7                                                          26    1.46    0.01  1.0000
  13   4   0      21       9                                                          29    1.46    0.01  1.0000
 -14  -4   0    1407      53                                                        1404   -0.07    0.03  1.0000
  14   4   0    1395      46                                                        1392   -0.07   -0.03  1.0000
  14   4   0    1427      51                                                        1424   -0.07   -0.03  1.0000
 -15  -4   0      53      16                                                          81    3.35   -0.02  1.0000
  15   4   0      79      15                                                         113    3.35    0.02  1.0000
 -16  -4   0    1697      66                                                        1671    0.61    0.00  1.0000
  16   4   0    1724      62                                                        1698    0.61    0.00  1.0000
 -16   5   0     163      23                                                         179    1.21    0.02  1.0000
 -16   5   0     219      31                                                         238    1.21    0.02  1.0000
  15  -5   0     828      47                                                         809    0.64    0.00  1.0000
 -15   5   0     805      45                                                         786    0.64    0.00  1.0000
 -15   5   0     844      48                                                         825    0.64    0.00  1.0000
  14  -5   0      37      17                                                          61   -3.39   -0.02  1.0000
 -14   5   0      53      17                                                          82   -3.39    0.02  1.0000
 -14   5   0      57      16                                                          86   -3.39    0.02  1.0000
  13  -5   0     657      38                                                         667    0.38    0.01  1.0000
  13  -5   0     688      37                                                         698    0.38    0.01  1.0000
 -13   5   0     696      39                                                         706    0.38   -0.01  1.0000
 -13   5   0     638      37                                                         648    0.38   -0.01  1.0000
  12  -5   0    1247      47                                                        1163   -2.33    0.01  1.0000
 -12   5   0    1252      49                                                        1168   -2.33   -0.01  1.0000
 -12   5   0    1143      49                                                        1063   -2.33   -0.01  1.0000
  11  -5   0     310      26                                                         401   -4.68    0.07  1.0000
 -11   5   0     340      28                                                         436   -4.68   -0.07  1.0000
 -11   5   0     291      26                                                         380   -4.68   -0.07  1.0000
  10  -5   0     437      25                                                         324    5.57    0.01  1.0000
  10  -5   0     405      24                                                         297    5.57    0.01  1.0000
 -10   5   0     434      25                                                         322    5.57   -0.01  1.0000
 -10   5   0     493      25                                                         373    5.57   -0.01  1.0000
   9  -5   0     165      15                                                         107   -4.85    0.07  1.0000
   9  -5   0     179      16                                                         118   -4.85    0.07  1.0000
  -9   5   0     201      16                                                         136   -4.85   -0.07  1.0000
  -9   5   0     169      15                                                         110   -4.85   -0.07  1.0000
   8  -5   0    1862      71                                                        2120    5.57    0.05  1.0000
   8  -5   0    1863      69                                                        2121    5.57    0.05  1.0000
  -8   5   0    1838      70                                                        2094    5.57   -0.05  1.0000
  -8   5   0    1863      72                                                        2121    5.57   -0.05  1.0000
   7  -5   0     118       9                                                          50    7.31   -0.03  1.0000
   7  -5   0     119       9                                                          51    7.31   -0.03  1.0000
  -7   5   0     101       8                                                          39    7.31    0.03  1.0000
   6  -5   0    3539      88                                                        2866   11.46    0.03  1.0000
   6  -5   0    3593      91                                                        2914   11.46    0.03  1.0000
  -6   5   0    3615      89                                                        2934   11.46   -0.03  1.0000
  -6   5   0    3507      91                                                        2837   11.46   -0.03  1.0000
   5  -5   0     410      17                                                         279   -6.83    0.00  1.0000
  -5   5   0     470      18                                                         329   -6.83    0.00  1.0000
  -5   5   0     433      17                                                         298   -6.83    0.00  1.0000
   4  -5   0     477      42                                                        1239   25.71    0.02  1.0000
  -4   5   0     469      42                                                        1226   25.71   -0.02  1.0000
  -4   5   0     484      43                                                        1251   25.71   -0.02  1.0000
   3  -5   0    2977      79                                                        2480    9.16    0.02  1.0000
  -3   5   0    3254      79                                                        2733    9.16   -0.02  1.0000
  -3   5   0    3181      81                                                        2667    9.16   -0.02  1.0000
   2  -5   0     158      14                                                         250   -6.23   -0.01  1.0000
  -2   5   0     159      14                                                         251   -6.23    0.01  1.0000
  -2   5   0     161      14                                                         254   -6.23    0.01  1.0000
   1  -5   0     162       8                                                          82   -7.06   -0.01  1.0000
  -1   5   0     176       8                                                          92   -7.06    0.01  1.0000
  -1  -5   0     159       8                                                          80   -7.05    0.01  1.0000
   1   5   0     151       7                                                          74   -7.05   -0.01  1.0000
   1   5   0     146       8                                                          71   -7.05   -0.01  1.0000
  -2  -5   0     164      13                                                         257    6.22    0.00  1.0000
   2   5   0     169      13                                                         264    6.22    0.00  1.0000
   2   5   0     156      13                                                         247    6.22    0.00  1.0000
  -3  -5   0    3275      80                                                        2753    9.16   -0.03  1.0000
   3   5   0    3206      79                                                        2690    9.16    0.03  1.0000
   3   5   0    3270      80                                                        2748    9.16    0.03  1.0000
  -4  -5   0     501      40                                                        1278  -25.71   -0.04  1.0000
   4   5   0     482      40                                                        1248  -25.71    0.04  1.0000
   4   5   0     481      39                                                        1246  -25.71    0.04  1.0000
  -5  -5   0     479      16                                                         336   -6.83   -0.04  1.0000
   5   5   0     461      15                                                         321   -6.83    0.04  1.0000
   5   5   0     476      14                                                         334   -6.83    0.04  1.0000
  -6  -5   0    3702      88                                                        3013  -11.46    0.00  1.0000
   6   5   0    3796      87                                                        3098  -11.46    0.00  1.0000
   6   5   0    3589      87                                                        2911  -11.46    0.00  1.0000
  -7  -5   0      99       6                                                          38    7.31   -0.02  1.0000
   7   5   0      86       5                                                          30    7.31    0.02  1.0000
   7   5   0     100       6                                                          39    7.31    0.02  1.0000
   7   5   0      89       5                                                          32    7.31    0.02  1.0000
  -8  -5   0    1986      69                                                        2253   -5.57   -0.03  1.0000
   8   5   0    1991      67                                                        2258   -5.57    0.03  1.0000
   8   5   0    1995      70                                                        2262   -5.57    0.03  1.0000
  -9  -5   0     215      13                                                         148   -4.84    0.07  1.0000
   9   5   0     189      12                                                         126   -4.84   -0.07  1.0000
   9   5   0     192      11                                                         129   -4.84   -0.07  1.0000
 -10  -5   0     533      21                                                         408   -5.58   -0.03  1.0000
  10   5   0     537      21                                                         411   -5.58    0.03  1.0000
  10   5   0     538      19                                                         412   -5.58    0.03  1.0000
 -11  -5   0     348      23                                                         444   -4.67    0.04  1.0000
  11   5   0     311      19                                                         403   -4.67   -0.04  1.0000
  11   5   0     293      21                                                         382   -4.67   -0.04  1.0000
 -12  -5   0    1288      44                                                        1203    2.33   -0.01  1.0000
  12   5   0    1274      39                                                        1189    2.33    0.01  1.0000
  12   5   0    1264      43                                                        1179    2.33    0.01  1.0000
 -13  -5   0     643      32                                                         653    0.38    0.02  1.0000
  13   5   0     660      31                                                         670    0.38   -0.02  1.0000
  13   5   0     664      26                                                         674    0.38   -0.02  1.0000
 -14  -5   0      45      13                                                          72    3.39    0.04  1.0000
  14   5   0      37       8                                                          62    3.39   -0.04  1.0000
  14   5   0      49       9                                                          77    3.39   -0.04  1.0000
  14   5   0      95      19                                                         132    3.39   -0.04  1.0000
 -15  -5   0     867      41                                                         847    0.65    0.00  1.0000
  15   5   0     909      32                                                         889    0.65    0.00  1.0000
  15   5   0     845      30                                                         825    0.65    0.00  1.0000
  16   5   0     255      29                                                         275   -1.21   -0.03  1.0000
  16   5   0     292      19                                                         314   -1.21   -0.03  1.0000
  15  -6   0     123      23                                                         131   -0.65    0.00  1.0000
 -15   6   0     123      21                                                         131   -0.65    0.00  1.0000
 -15   6   0     112      23                                                         119   -0.65    0.00  1.0000
  14  -6   0     827      47                                                         902    2.46   -0.03  1.0000
 -14   6   0     734      46                                                         805    2.46    0.03  1.0000
 -14   6   0     745      48                                                         816    2.46    0.03  1.0000
  13  -6   0     399      32                                                         372   -1.30    0.03  1.0000
 -13   6   0     363      31                                                         338   -1.30   -0.03  1.0000
 -13   6   0     326      30                                                         302   -1.30   -0.03  1.0000
  12  -6   0      33      12                                                          11   -4.77   -0.02  1.0000
 -12   6   0      15      10                                                           2   -4.77    0.02  1.0000
 -12   6   0      12      11                                                           1   -4.77    0.02  1.0000
  11  -6   0     255      25                                                         317    3.52    0.01  1.0000
 -11   6   0     244      25                                                         304    3.52   -0.01  1.0000
 -11   6   0     271      26                                                         335    3.52   -0.01  1.0000
  10  -6   0    3452     107                                                        3425    0.44    0.02  1.0000
 -10   6   0    3461     109                                                        3434    0.44   -0.02  1.0000
 -10   6   0    3436     112                                                        3410    0.44   -0.02  1.0000
   9  -6   0       8       9                                                          17   -2.51    0.06  1.0000
  -9   6   0       9       9                                                          18   -2.51   -0.06  1.0000
  -9   6   0      14       9                                                          26   -2.51   -0.06  1.0000
   8  -6   0     416      25                                                         441    1.18    0.00  1.0000
  -8   6   0     502      27                                                         530    1.18    0.00  1.0000
  -8   6   0     395      25                                                         420    1.18    0.00  1.0000
   7  -6   0    1634      64                                                        1861    5.24    0.00  1.0000
  -7   6   0    1699      66                                                        1931    5.24    0.00  1.0000
  -7   6   0    1709      65                                                        1941    5.24    0.00  1.0000
   6  -6   0    8992     219                                                        7694  -13.69   -0.01  1.0000
  -6   6   0    9137     220                                                        7828  -13.69    0.01  1.0000
  -6   6   0    8856     225                                                        7568  -13.69    0.01  1.0000
   5  -6   0    4374     135                                                        4464   -1.31   -0.03  1.0000
  -5   6   0    4620     136                                                        4713   -1.31    0.03  1.0000
  -5   6   0    4609     140                                                        4702   -1.31    0.03  1.0000
   4  -6   0   10757     324                                                       11464   -6.46    0.01  1.0000
  -4   6   0   10960     333                                                       11674   -6.46   -0.01  1.0000
  -4   6   0   11132     325                                                       11851   -6.46   -0.01  1.0000
   3  -6   0    1151      26                                                         616  -17.52   -0.01  1.0000
  -3   6   0    1195      26                                                         649  -17.52    0.01  1.0000
  -3   6   0    1206      27                                                         657  -17.52    0.01  1.0000
   2  -6   0    1582      68                                                        2133   12.33    0.00  1.0000
  -2   6   0    1679      70                                                        2245   12.33    0.00  1.0000
  -2   6   0    1636      68                                                        2196   12.33    0.00  1.0000
   1  -6   0     424      18                                                         377    2.26    0.02  1.0000
  -1   6   0     409      18                                                         363    2.26   -0.02  1.0000
  -1   6   0     405      19                                                         359    2.26   -0.02  1.0000
  -1   6   0     399      17                                                         354    2.26   -0.02  1.0000
   0  -6   0   13573     402                                                       14675    8.93   -0.05  1.0000
   0   6   0   13406     402                                                       14502    8.93    0.05  1.0000
   0   6   0   13580     401                                                       14683    8.93    0.05  1.0000
  -1  -6   0     395      17                                                         350   -2.25   -0.05  1.0000
   1   6   0     402      17                                                         357   -2.25    0.05  1.0000
  -2  -6   0    1672      66                                                        2237   12.32   -0.03  1.0000
   2   6   0    1566      65                                                        2114   12.32    0.03  1.0000
   2   6   0    1537      66                                                        2080   12.32    0.03  1.0000
  -3  -6   0    1267      26                                                         702   17.53   -0.02  1.0000
   3   6   0    1193      24                                                         647   17.53    0.02  1.0000
   3   6   0    1174      25                                                         633   17.53    0.02  1.0000
  -4  -6   0   11310     329                                                       12036   -6.47   -0.04  1.0000
   4   6   0   11069     328                                                       11788   -6.47    0.04  1.0000
   4   6   0   11214     327                                                       11937   -6.47    0.04  1.0000
  -5  -6   0    4872     141                                                        4967    1.31    0.01  1.0000
   5   6   0    4747     140                                                        4841    1.31   -0.01  1.0000
   5   6   0    4872     139                                                        4967    1.31   -0.01  1.0000
  -6  -6   0    9484     224                                                        8150  -13.68    0.01  1.0000
   6   6   0    9389     223                                                        8062  -13.68   -0.01  1.0000
   6   6   0    9198     223                                                        7885  -13.68   -0.01  1.0000
  -7  -6   0    1714      61                                                        1946   -5.23    0.00  1.0000
   7   6   0    1743      59                                                        1977   -5.23    0.00  1.0000
   7   6   0    1656      59                                                        1885   -5.23    0.00  1.0000
  -8  -6   0     418      21                                                         443    1.18    0.03  1.0000
   8   6   0     433      22                                                         459    1.18   -0.03  1.0000
   8   6   0     433      19                                                         459    1.18   -0.03  1.0000
  -9  -6   0      17       7                                                          29    2.51   -0.04  1.0000
   9   6   0      17       7                                                          30    2.51    0.04  1.0000
   9   6   0      15       5                                                          27    2.51    0.04  1.0000
 -10  -6   0    3527     103                                                        3500    0.44    0.01  1.0000
  10   6   0    3491     105                                                        3464    0.44   -0.01  1.0000
  10   6   0    3526     100                                                        3499    0.44   -0.01  1.0000
  10   6   0    3423     100                                                        3396    0.44   -0.01  1.0000
 -11  -6   0     265      21                                                         328   -3.52   -0.04  1.0000
  11   6   0     236      17                                                         296   -3.52    0.04  1.0000
  11   6   0     280      20                                                         344   -3.52    0.04  1.0000
  11   6   0     255      16                                                         317   -3.52    0.04  1.0000
 -12  -6   0      49       8                                                          21   -4.77   -0.02  1.0000
  12   6   0      24       6                                                           6   -4.77    0.02  1.0000
  12   6   0      18       6                                                           3   -4.77    0.02  1.0000
  12   6   0      12       8                                                           1   -4.77    0.02  1.0000
 -13  -6   0     383      24                                                         357    1.30   -0.04  1.0000
  13   6   0     358      17                                                         333    1.30    0.04  1.0000
  13   6   0     354      23                                                         329    1.30    0.04  1.0000
  13   6   0     336      17                                                         312    1.30    0.04  1.0000
 -14  -6   0     973      41                                                        1054    2.46   -0.03  1.0000
  14   6   0     824      39                                                         899    2.46    0.03  1.0000
  14   6   0     855      32                                                         931    2.46    0.03  1.0000
  14   6   0     804      31                                                         878    2.46    0.03  1.0000
 -15  -6   0      91      16                                                          98    0.65   -0.01  1.0000
  15  -7   0     686      53                                                         722    1.32    0.00  1.0000
 -15   7   0     788      52                                                         827    1.32    0.00  1.0000
 -15   7   0     664      49                                                         700    1.32    0.00  1.0000
  14  -7   0       1      17                                                          -6    1.79   -0.02  1.0000
 -14   7   0       1      17                                                          -7    1.79    0.02  1.0000
 -14   7   0       1      15                                                          -9    1.79    0.02  1.0000
  13  -7   0     592      39                                                         611   -0.73   -0.01  1.0000
 -13   7   0     514      41                                                         531   -0.73    0.01  1.0000
 -13   7   0     527      37                                                         545   -0.73    0.01  1.0000
  12  -7   0       1      13                                                          -1   -1.59   -0.01  1.0000
 -12   7   0       1      13                                                          -7   -1.59    0.01  1.0000
 -12   7   0       1      11                                                          -6   -1.59    0.01  1.0000
  11  -7   0     872      41                                                         800   -2.39    0.04  1.0000
 -11   7   0     984      43                                                         908   -2.39   -0.04  1.0000
 -11   7   0     845      41                                                         774   -2.39   -0.04  1.0000
  10  -7   0       6      10                                                          -6   -4.80    0.04  1.0000
 -10   7   0       6      10                                                          -4   -4.80   -0.04  1.0000
 -10   7   0       6       9                                                         -16   -4.80   -0.04  1.0000
   9  -7   0     687      36                                                         761   -2.66    0.05  1.0000
  -9   7   0     626      36                                                         697   -2.66   -0.05  1.0000
  -9   7   0     687      37                                                         761   -2.66   -0.05  1.0000
   8  -7   0     119      21                                                         248    9.35   -0.02  1.0000
  -8   7   0     110      19                                                         236    9.35    0.02  1.0000
  -8   7   0     108      21                                                         232    9.35    0.02  1.0000
   7  -7   0      91      10                                                          49   -4.93    0.03  1.0000
  -7   7   0      67       8                                                          32   -4.93   -0.03  1.0000
  -7   7   0      90      10                                                          48   -4.93   -0.03  1.0000
   6  -7   0     440      16                                                         185   14.19    0.00  1.0000
  -6   7   0     426      17                                                         176   14.19    0.00  1.0000
  -6   7   0     403      18                                                         161   14.19    0.00  1.0000
   5  -7   0     914      25                                                         490   15.59    0.02  1.0000
  -5   7   0     929      25                                                         501   15.59   -0.02  1.0000
  -5   7   0     899      25                                                         479   15.59   -0.02  1.0000
   4  -7   0      75      15                                                         156    7.31    0.00  1.0000
  -4   7   0      87      16                                                         172    7.31    0.00  1.0000
  -4   7   0      60      14                                                         133    7.31    0.00  1.0000
   3  -7   0    2022      66                                                        1992   -0.65   -0.03  1.0000
  -3   7   0    2126      68                                                        2095   -0.65    0.03  1.0000
  -3   7   0    2073      66                                                        2042   -0.65    0.03  1.0000
   2  -7   0       0       6                                                          16    6.70    0.00  1.0000
  -2   7   0       0       6                                                          16    6.70    0.00  1.0000
  -2   7   0       1       6                                                          20    6.70    0.00  1.0000
   1  -7   0     702      36                                                         969   -8.91   -0.04  1.0000
  -1   7   0     661      37                                                         921   -8.91    0.04  1.0000
  -1   7   0     706      35                                                         974   -8.91    0.04  1.0000
  -1   7   0     692      36                                                         957   -8.91    0.04  1.0000
  -1  -7   0     728      36                                                        1000   -8.92   -0.02  1.0000
   1   7   0     708      36                                                         976   -8.92    0.02  1.0000
   1   7   0     686      35                                                         950   -8.92    0.02  1.0000
  -2  -7   0       0       6                                                          16   -6.70    0.03  1.0000
   2   7   0       0       5                                                          13   -6.70   -0.03  1.0000
   2   7   0       1       6                                                          21   -6.70   -0.03  1.0000
  -3  -7   0    2139      67                                                        2108   -0.65    0.00  1.0000
   3   7   0    2261      67                                                        2229   -0.65    0.00  1.0000
   3   7   0    2203      68                                                        2171   -0.65    0.00  1.0000
  -4  -7   0     101      14                                                         192   -7.31    0.02  1.0000
   4   7   0      96      12                                                         185   -7.31   -0.02  1.0000
   4   7   0      80      14                                                         163   -7.31   -0.02  1.0000
  -5  -7   0     959      23                                                         523   15.59   -0.01  1.0000
   5   7   0     944      23                                                         512   15.59    0.01  1.0000
   5   7   0     947      22                                                         514   15.59    0.01  1.0000
  -6  -7   0     478      15                                                         210  -14.19   -0.01  1.0000
   6   7   0     484      15                                                         214  -14.19    0.01  1.0000
   6   7   0     483      13                                                         213  -14.19    0.01  1.0000
  -7  -7   0      99       8                                                          55   -4.93    0.02  1.0000
   7   7   0     117       9                                                          68   -4.93   -0.02  1.0000
   7   7   0     121      11                                                          71   -4.93   -0.02  1.0000
  -8  -7   0     126      16                                                         259   -9.35    0.01  1.0000
   8   7   0     119      14                                                         249   -9.35   -0.01  1.0000
   8   7   0     130      15                                                         264   -9.35   -0.01  1.0000
  -9  -7   0     725      32                                                         801   -2.65    0.05  1.0000
   9   7   0     711      33                                                         786   -2.65   -0.05  1.0000
   9   7   0     735      29                                                         812   -2.65   -0.05  1.0000
 -10  -7   0       6       8                                                          25    4.80   -0.04  1.0000
  10   7   0       1       5                                                          12    4.80    0.04  1.0000
  10   7   0       1       6                                                          10    4.80    0.04  1.0000
  10   7   0       3       8                                                          18    4.80    0.04  1.0000
 -11  -7   0     888      34                                                         816   -2.39    0.02  1.0000
  11   7   0     901      30                                                         828   -2.39   -0.02  1.0000
  11   7   0     922      30                                                         848   -2.39   -0.02  1.0000
  11   7   0     902      35                                                         829   -2.39   -0.02  1.0000
 -12  -7   0       1       8                                                          -8    1.59    0.03  1.0000
  12   7   0       1       6                                                          -3    1.59   -0.03  1.0000
  12   7   0       8       9                                                          12    1.59   -0.03  1.0000
  12   7   0       1       6                                                          -8    1.59   -0.03  1.0000
 -13  -7   0     569      30                                                         587   -0.73   -0.01  1.0000
  13   7   0     540      23                                                         558   -0.73    0.01  1.0000
  13   7   0     534      29                                                         552   -0.73    0.01  1.0000
  13   7   0     526      22                                                         543   -0.73    0.01  1.0000
 -14  -7   0       7      12                                                          13   -1.79    0.01  1.0000
  15   7   0     427      32                                                         456    1.32    0.03  1.0000
 -14   8   0     953      56                                                         930   -0.72    0.01  1.0000
 -14   8   0     867      50                                                         845   -0.72    0.01  1.0000
  13  -8   0      38      19                                                          31    1.13   -0.04  1.0000
 -13   8   0      59      18                                                          50    1.13    0.04  1.0000
 -13   8   0      19      15                                                          14    1.13    0.04  1.0000
  12  -8   0     527      40                                                         598    2.87   -0.03  1.0000
 -12   8   0     518      37                                                         588    2.87    0.03  1.0000
 -12   8   0     519      41                                                         589    2.87    0.03  1.0000
  11  -8   0       0      13                                                          -8    0.21    0.00  1.0000
 -11   8   0       0      11                                                         -24    0.21    0.00  1.0000
 -11   8   0       0      12                                                          -1    0.21    0.00  1.0000
  10  -8   0    4124     138                                                        4352   -3.37   -0.01  1.0000
 -10   8   0    4086     142                                                        4313   -3.37    0.01  1.0000
 -10   8   0    4337     140                                                        4571   -3.37    0.01  1.0000
   9  -8   0       4      10                                                         -18    3.99    0.04  1.0000
  -9   8   0      22      10                                                           7    3.99   -0.04  1.0000
  -9   8   0       4       9                                                          -8    3.99   -0.04  1.0000
   8  -8   0     406      25                                                         336   -3.51    0.02  1.0000
  -8   8   0     438      26                                                         365   -3.51   -0.02  1.0000
  -8   8   0     382      24                                                         314   -3.51   -0.02  1.0000
   7  -8   0    1430      58                                                        1588   -3.93    0.02  1.0000
  -7   8   0    1381      59                                                        1537   -3.93   -0.02  1.0000
  -7   8   0    1396      58                                                        1553   -3.93   -0.02  1.0000
   6  -8   0    1073      45                                                        1106    0.97    0.02  1.0000
  -6   8   0    1074      45                                                        1107    0.97   -0.02  1.0000
  -6   8   0    1104      44                                                        1138    0.97   -0.02  1.0000
   5  -8   0    4187     116                                                        3811   -5.73   -0.01  1.0000
  -5   8   0    4101     119                                                        3729   -5.73    0.01  1.0000
  -5   8   0    4183     116                                                        3807   -5.73    0.01  1.0000
   4  -8   0    2529      90                                                        2708   -3.37    0.05  1.0000
  -4   8   0    2737      93                                                        2924   -3.37   -0.05  1.0000
  -4   8   0    2765      91                                                        2953   -3.37   -0.05  1.0000
   3  -8   0      41       8                                                          30    1.87    0.01  1.0000
  -3   8   0      61       9                                                          47    1.87   -0.01  1.0000
  -3   8   0      66       9                                                          52    1.87   -0.01  1.0000
   2  -8   0    1557      58                                                        1694   -3.26   -0.04  1.0000
  -2   8   0    1522      57                                                        1657   -3.26    0.04  1.0000
  -2   8   0    1529      59                                                        1664   -3.26    0.04  1.0000
  -2   8   0    1635      60                                                        1775   -3.26    0.04  1.0000
   1  -8   0     206      20                                                         307   -6.07   -0.02  1.0000
  -1   8   0     253      22                                                         363   -6.07    0.02  1.0000
  -1   8   0     220      20                                                         324   -6.07    0.02  1.0000
  -1   8   0     236      19                                                         343   -6.07    0.02  1.0000
   0  -8   0   11077     299                                                       10867   -1.93   -0.03  1.0000
   0   8   0   10710     297                                                       10504   -1.93    0.03  1.0000
   0   8   0   10927     306                                                       10719   -1.93    0.03  1.0000
   0   8   0   10716     299                                                       10510   -1.93    0.03  1.0000
  -1  -8   0     219      19                                                         322    6.06   -0.02  1.0000
   1   8   0     210      18                                                         311    6.06    0.02  1.0000
   1   8   0     217      21                                                         320    6.06    0.02  1.0000
  -2  -8   0    1563      57                                                        1700   -3.27   -0.05  1.0000
   2   8   0    1602      56                                                        1741   -3.27    0.05  1.0000
   2   8   0    1594      58                                                        1732   -3.27    0.05  1.0000
  -3  -8   0      45       8                                                          33   -1.90   -0.03  1.0000
   3   8   0      60       7                                                          46   -1.90    0.03  1.0000
   3   8   0      44       8                                                          32   -1.90    0.03  1.0000
   4   8   0    2946      96                                                        3139   -3.37   -0.04  1.0000
   4   8   0    3026      95                                                        3222   -3.37   -0.04  1.0000
   5   8   0    4382     119                                                        3997    5.73   -0.02  1.0000
   5   8   0    4409     117                                                        4023    5.73   -0.02  1.0000
  -6  -8   0    1218      44                                                        1254    0.98    0.01  1.0000
   6   8   0    1221      42                                                        1257    0.98   -0.01  1.0000
   6   8   0    1183      44                                                        1218    0.98   -0.01  1.0000
  -7  -8   0    1488      54                                                        1649    3.92   -0.03  1.0000
   7   8   0    1384      53                                                        1540    3.92    0.03  1.0000
   7   8   0    1472      52                                                        1632    3.92    0.03  1.0000
  -8  -8   0     444      21                                                         371   -3.51    0.03  1.0000
   8   8   0     368      19                                                         301   -3.51   -0.03  1.0000
   8   8   0     465      18                                                         390   -3.51   -0.03  1.0000
  -9  -8   0      14       7                                                           3   -4.00   -0.01  1.0000
   9   8   0       4       6                                                           0   -4.00    0.01  1.0000
   9   8   0       4       8                                                          -7   -4.00    0.01  1.0000
 -10  -8   0    4314     135                                                        4548   -3.38   -0.03  1.0000
  10   8   0    4373     131                                                        4608   -3.38    0.03  1.0000
  10   8   0    4371     133                                                        4606   -3.38    0.03  1.0000
  10   8   0    4339     139                                                        4573   -3.38    0.03  1.0000
 -11  -8   0       0       9                                                          -4   -0.21   -0.01  1.0000
  11   8   0       0       6                                                          -5   -0.21    0.01  1.0000
  11   8   0       5      10                                                           5   -0.21    0.01  1.0000
  11   8   0       3       7                                                           3   -0.21    0.01  1.0000
 -12  -8   0     539      31                                                         611    2.87   -0.02  1.0000
  12   8   0     521      31                                                         591    2.87    0.02  1.0000
  12   8   0     533      25                                                         604    2.87    0.02  1.0000
  12   8   0     543      24                                                         615    2.87    0.02  1.0000
 -13  -8   0      10      11                                                           7   -1.13    0.02  1.0000
  13   8   0      19       7                                                          14   -1.13   -0.02  1.0000
  13   8   0      16       6                                                          12   -1.13   -0.02  1.0000
 -13   9   0     318      37                                                         312   -0.35    0.02  1.0000
 -13   9   0     436      43                                                         428   -0.35    0.02  1.0000
 -12   9   0       0      14                                                           0   -1.22    0.01  1.0000
 -12   9   0      39      17                                                          32   -1.22    0.01  1.0000
  11  -9   0     223      34                                                         252   -1.82   -0.02  1.0000
 -11   9   0     248      31                                                         279   -1.82    0.02  1.0000
 -11   9   0     222      30                                                         251   -1.82    0.02  1.0000
  10  -9   0       9      14                                                           4    1.96   -0.01  1.0000
 -10   9   0       1      12                                                         -17    1.96    0.01  1.0000
 -10   9   0      19      14                                                          11    1.96    0.01  1.0000
   9  -9   0       2      11                                                          -4   -2.53    0.02  1.0000
  -9   9   0       5      11                                                           1   -2.53   -0.02  1.0000
  -9   9   0      36      12                                                          24   -2.53   -0.02  1.0000
   8  -9   0      21      12                                                          11   -2.54   -0.02  1.0000
  -8   9   0      28      11                                                          16   -2.54    0.02  1.0000
  -8   9   0       2      10                                                           0   -2.54    0.02  1.0000
   7  -9   0     161      15                                                         105    4.74    0.04  1.0000
  -7   9   0     207      19                                                         142    4.74   -0.04  1.0000
  -7   9   0     146      14                                                          93    4.74   -0.04  1.0000
   6  -9   0       0       9                                                          15    6.40    0.00  1.0000
  -6   9   0      11       9                                                           0    6.40    0.00  1.0000
  -6   9   0       5       8                                                           1    6.40    0.00  1.0000
   5  -9   0     454      28                                                         494    1.77    0.00  1.0000
  -5   9   0     460      28                                                         500    1.77    0.00  1.0000
  -5   9   0     471      28                                                         512    1.77    0.00  1.0000
   4  -9   0       8      10                                                          54    8.87    0.03  1.0000
  -4   9   0       9      11                                                          59    8.87   -0.03  1.0000
  -4   9   0      12      12                                                          66    8.87   -0.03  1.0000
   3  -9   0    1595      51                                                        1400    4.85    0.03  1.0000
  -3   9   0    1479      52                                                        1291    4.85   -0.03  1.0000
  -3   9   0    1562      52                                                        1369    4.85   -0.03  1.0000
  -3   9   0    1649      51                                                        1451    4.85   -0.03  1.0000
   2  -9   0      10       8                                                          -4    5.99    0.03  1.0000
  -2   9   0      10       6                                                          -9    5.99   -0.03  1.0000
  -2   9   0      10       7                                                          -7    5.99   -0.03  1.0000
  -2   9   0      10       8                                                          -8    5.99   -0.03  1.0000
   1  -9   0     163      13                                                          95   -5.82   -0.02  1.0000
  -1   9   0     157      12                                                          90   -5.82    0.02  1.0000
  -1   9   0     122      11                                                          64   -5.82    0.02  1.0000
  -1   9   0     189      14                                                         115   -5.82    0.02  1.0000
  -1  -9   0     120      11                                                          63   -5.81    0.01  1.0000
   1   9   0     154      12                                                          88   -5.81   -0.01  1.0000
   1   9   0     186      16                                                         113   -5.81   -0.01  1.0000
   1   9   0     124      10                                                          66   -5.81   -0.01  1.0000
  -2  -9   0      10       7                                                           0   -5.99   -0.02  1.0000
   2   9   0      10       7                                                         -10   -5.99    0.02  1.0000
   2   9   0      10       5                                                          -2   -5.99    0.02  1.0000
  -3  -9   0    1616      51                                                        1419    4.86    0.03  1.0000
   3   9   0    1672      52                                                        1472    4.86   -0.03  1.0000
   3   9   0    1623      49                                                        1426    4.86   -0.03  1.0000
   4   9   0      16      11                                                          75   -8.86    0.00  1.0000
   4   9   0      19      12                                                          81   -8.86    0.00  1.0000
   5   9   0     510      24                                                         552    1.77    0.02  1.0000
   5   9   0     496      27                                                         538    1.77    0.02  1.0000
   6   9   0       2       7                                                          22   -6.40    0.00  1.0000
   6   9   0       0       8                                                          14   -6.40    0.00  1.0000
   7   9   0     160      15                                                         104    4.74   -0.03  1.0000
   7   9   0     179      13                                                         119    4.74   -0.03  1.0000
  -8  -9   0      35       9                                                          21    2.54    0.01  1.0000
   8   9   0      27       7                                                          15    2.54   -0.01  1.0000
   8   9   0       2       8                                                          -1    2.54   -0.01  1.0000
  -9  -9   0      13       9                                                           6   -2.54    0.00  1.0000
   9   9   0      15       8                                                           8   -2.54    0.00  1.0000
   9   9   0      10       7                                                           4   -2.54    0.00  1.0000
 -10  -9   0      24      10                                                          15   -1.95    0.01  1.0000
  10   9   0      45       8                                                          32   -1.95   -0.01  1.0000
  10   9   0      45      11                                                          32   -1.95   -0.01  1.0000
 -11  -9   0     228      23                                                         257   -1.82   -0.01  1.0000
  11   9   0     244      19                                                         274   -1.82    0.01  1.0000
  11   9   0     183      24                                                         210   -1.82    0.01  1.0000
  11   9   0     207      17                                                         235   -1.82    0.01  1.0000
 -12  -9   0       3      11                                                           1    1.23   -0.01  1.0000
  12   9   0      12       7                                                           8    1.23    0.01  1.0000
  12   9   0       0       7                                                          -1    1.23    0.01  1.0000
  13   9   0     436      19                                                         428   -0.35    0.05  1.0000
  12 -10   0     145      24                                                         111   -2.86   -0.01  1.0000
 -12  10   0     149      22                                                         115   -2.86    0.01  1.0000
 -12  10   0     149      22                                                         115   -2.86    0.01  1.0000
  11 -10   0      44      19                                                          54    1.32    0.00  1.0000
 -11  10   0      21      16                                                          28    1.32    0.00  1.0000
 -11  10   0      40      18                                                          49    1.32    0.00  1.0000
 -10  10   0    2130      79                                                        2046    1.78    0.01  1.0000
 -10  10   0    2103      80                                                        2019    1.78    0.01  1.0000
  -9  10   0     920      48                                                         934   -0.45   -0.02  1.0000
  -9  10   0    1020      49                                                        1035   -0.45   -0.02  1.0000
  -8  10   0     655      39                                                         706    1.87   -0.01  1.0000
  -8  10   0     647      40                                                         697    1.87   -0.01  1.0000
   7 -10   0     505      32                                                         448   -2.53   -0.02  1.0000
  -7  10   0     497      31                                                         440   -2.53    0.02  1.0000
  -7  10   0     505      30                                                         448   -2.53    0.02  1.0000
   6 -10   0    3621     114                                                        3419   -3.27    0.03  1.0000
  -6  10   0    3744     118                                                        3539   -3.27   -0.03  1.0000
  -6  10   0    3963     115                                                        3752   -3.27   -0.03  1.0000
   5 -10   0    1060      48                                                        1138   -2.25   -0.01  1.0000
  -5  10   0     970      47                                                        1044   -2.25    0.01  1.0000
  -5  10   0     959      45                                                        1033   -2.25    0.01  1.0000
  -5  10   0    1019      49                                                        1095   -2.25    0.01  1.0000
   4 -10   0    4589     143                                                        4718   -1.82   -0.01  1.0000
  -4  10   0    4586     144                                                        4715   -1.82    0.01  1.0000
  -4  10   0    4217     144                                                        4341   -1.82    0.01  1.0000
  -4  10   0    4654     142                                                        4784   -1.82    0.01  1.0000
   3 -10   0    1802      64                                                        1734   -1.57   -0.01  1.0000
  -3  10   0    1896      67                                                        1826   -1.57    0.01  1.0000
  -3  10   0    1879      66                                                        1809   -1.57    0.01  1.0000
  -3  10   0    1864      64                                                        1794   -1.57    0.01  1.0000
   2 -10   0     356      28                                                         447   -4.38    0.02  1.0000
  -2  10   0     365      26                                                         457   -4.38   -0.02  1.0000
  -2  10   0     383      27                                                         477   -4.38   -0.02  1.0000
  -2  10   0     328      29                                                         415   -4.38   -0.02  1.0000
   1 -10   0    2718      86                                                        2545    3.25    0.03  1.0000
  -1  10   0    2760      87                                                        2585    3.25   -0.03  1.0000
  -1  10   0    2810      85                                                        2634    3.25   -0.03  1.0000
  -1  10   0    2835      87                                                        2658    3.25   -0.03  1.0000
   0 -10   0    7481     206                                                        7295   -2.08    0.02  1.0000
   0  10   0    7622     211                                                        7434   -2.08   -0.02  1.0000
   0  10   0    7409     207                                                        7224   -2.08   -0.02  1.0000
   0  10   0    6518     203                                                        6344   -2.08   -0.02  1.0000
  -1 -10   0    2899      86                                                        2719   -3.26    0.01  1.0000
   1  10   0    2559      83                                                        2390   -3.26   -0.01  1.0000
   1  10   0    2879      87                                                        2700   -3.26   -0.01  1.0000
   1  10   0    2864      87                                                        2685   -3.26   -0.01  1.0000
  -2 -10   0     341      25                                                         430   -4.38   -0.01  1.0000
   2  10   0     350      27                                                         440   -4.38    0.01  1.0000
   2  10   0     292      22                                                         375   -4.38    0.01  1.0000
   2  10   0     329      25                                                         417   -4.38    0.01  1.0000
   3  10   0    1756      60                                                        1688    1.57   -0.03  1.0000
   3  10   0    1968      64                                                        1896    1.57   -0.03  1.0000
   4  10   0    3922     131                                                        4042   -1.83    0.01  1.0000
   4  10   0    4743     136                                                        4875   -1.83    0.01  1.0000
   5  10   0    1068      45                                                        1146    2.26   -0.01  1.0000
   5  10   0     989      41                                                        1064    2.26   -0.01  1.0000
   6  10   0    3974     115                                                        3762   -3.28    0.00  1.0000
   6  10   0    3937     112                                                        3726   -3.28    0.00  1.0000
   7  10   0     545      24                                                         485    2.53   -0.02  1.0000
   7  10   0     520      28                                                         462    2.53   -0.02  1.0000
   8  10   0     650      33                                                         700    1.87    0.01  1.0000
   8  10   0     644      30                                                         694    1.87    0.01  1.0000
   9  10   0     982      40                                                         997    0.45   -0.02  1.0000
   9  10   0    1045      38                                                        1060    0.45   -0.02  1.0000
  10  10   0    2234      67                                                        2148    1.77   -0.01  1.0000
  11  10   0      36       9                                                          45   -1.33   -0.03  1.0000
  11  10   0      46      11                                                          56   -1.33   -0.03  1.0000
  12  10   0     146      17                                                         112   -2.86    0.00  1.0000
  12  10   0     163      15                                                         127   -2.86    0.00  1.0000
  11 -11   0     332      45                                                         308   -1.31    0.00  1.0000
 -11  11   0     232      29                                                         212   -1.31    0.00  1.0000
 -11  11   0     305      39                                                         282   -1.31    0.00  1.0000
  10 -11   0      51      21                                                          93   -4.87   -0.02  1.0000
 -10  11   0      38      20                                                          76   -4.87    0.02  1.0000
 -10  11   0      66      21                                                         113   -4.87    0.02  1.0000
   9 -11   0     463      36                                                         466   -0.13   -0.01  1.0000
  -9  11   0     417      35                                                         420   -0.13    0.01  1.0000
  -9  11   0     402      35                                                         405   -0.13    0.01  1.0000
   8 -11   0     734      45                                                         781    1.63   -0.01  1.0000
  -8  11   0     660      42                                                         704    1.63    0.01  1.0000
  -8  11   0     737      44                                                         784    1.63    0.01  1.0000
   7 -11   0     819      47                                                         839    0.67    0.04  1.0000
  -7  11   0     856      45                                                         877    0.67   -0.04  1.0000
  -7  11   0     812      45                                                         832    0.67   -0.04  1.0000
  -6  11   0     571      36                                                         526    1.86   -0.07  1.0000
  -6  11   0     572      33                                                         527    1.86   -0.07  1.0000
  -5  11   0     323      25                                                         280    2.41   -0.09  1.0000
  -5  11   0     326      27                                                         282    2.41   -0.09  1.0000
  -5  11   0     304      31                                                         262    2.41   -0.09  1.0000
  -4  11   0      11      15                                                          29    4.08    0.01  1.0000
  -4  11   0      24      14                                                          49    4.08    0.01  1.0000
  -4  11   0       9      13                                                          26    4.08    0.01  1.0000
  -3  11   0     332      29                                                         335    0.16   -0.07  1.0000
  -3  11   0     331      27                                                         334    0.16   -0.07  1.0000
  -3  11   0     389      27                                                         392    0.16   -0.07  1.0000
  -2  11   0     182      26                                                         222    2.69   -0.03  1.0000
  -2  11   0     249      22                                                         295    2.69   -0.03  1.0000
  -2  11   0     262      25                                                         309    2.69   -0.03  1.0000
  -1  11   0      28       9                                                          29   -0.22    0.01  1.0000
  -1  11   0      47      12                                                          49   -0.22    0.01  1.0000
  -1  11   0      58      15                                                          60   -0.22    0.01  1.0000
  -1 -11   0      32      11                                                          33   -0.23    0.02  1.0000
   1  11   0      30      12                                                          31   -0.23   -0.02  1.0000
   1  11   0      33      10                                                          34   -0.23   -0.02  1.0000
   1  11   0      47      14                                                          49   -0.23   -0.02  1.0000
  -2 -11   0     243      24                                                         288   -2.68    0.00  1.0000
   2  11   0     249      25                                                         295   -2.68    0.00  1.0000
   2  11   0     264      28                                                         311   -2.68    0.00  1.0000
   2  11   0     237      21                                                         282   -2.68    0.00  1.0000
   3  11   0     391      29                                                         394    0.17   -0.07  1.0000
   3  11   0     398      27                                                         402    0.17   -0.07  1.0000
   3  11   0     420      24                                                         424    0.17   -0.07  1.0000
   4  11   0      20      11                                                          44   -4.06    0.00  1.0000
   4  11   0       7      14                                                          23   -4.06    0.00  1.0000
   5  11   0     279      25                                                         239    2.42   -0.04  1.0000
   5  11   0     241      20                                                         204    2.42   -0.04  1.0000
   6  11   0     486      33                                                         444   -1.86    0.05  1.0000
   6  11   0     525      27                                                         482   -1.86    0.05  1.0000
   7  11   0     894      42                                                         915    0.68   -0.01  1.0000
   7  11   0     838      36                                                         858    0.68   -0.01  1.0000
   8  11   0     731      33                                                         777   -1.63    0.00  1.0000
   8  11   0     696      37                                                         741   -1.63    0.00  1.0000
   9  11   0     414      23                                                         417   -0.14    0.04  1.0000
   9  11   0     382      27                                                         385   -0.14    0.04  1.0000
  10  11   0      54      18                                                          97    4.87    0.01  1.0000
  10  11   0      87      17                                                         141    4.87    0.01  1.0000
  11  11   0     333      21                                                         309   -1.31   -0.01  1.0000
  11  11   0     306      33                                                         283   -1.31   -0.01  1.0000
 -10  12   0     706      50                                                         725   -0.70    0.01  1.0000
 -10  12   0     781      50                                                         801   -0.70    0.01  1.0000
   9 -12   0      66      24                                                          58   -0.99    0.02  1.0000
  -9  12   0      80      20                                                          71   -0.99   -0.02  1.0000
  -9  12   0      82      22                                                          73   -0.99   -0.02  1.0000
   8 -12   0       0      18                                                         -15   -0.75    0.01  1.0000
  -8  12   0      18      16                                                          15   -0.75   -0.01  1.0000
  -8  12   0      25      16                                                          21   -0.75   -0.01  1.0000
  -8  12   0       4      17                                                           3   -0.75   -0.01  1.0000
   7 -12   0     501      42                                                         529   -1.19   -0.02  1.0000
  -7  12   0     497      38                                                         525   -1.19    0.02  1.0000
  -7  12   0     520      44                                                         549   -1.19    0.02  1.0000
  -7  12   0     542      39                                                         571   -1.19    0.02  1.0000
   6 -12   0    3064     108                                                        3104    0.68    0.05  1.0000
  -6  12   0    3014     109                                                        3053    0.68   -0.05  1.0000
  -6  12   0    3023     105                                                        3062    0.68   -0.05  1.0000
   5 -12   0    1267      57                                                        1232   -0.95    0.02  1.0000
  -5  12   0    1298      54                                                        1263   -0.95   -0.02  1.0000
  -5  12   0    1220      57                                                        1186   -0.95   -0.02  1.0000
   4 -12   0    4193     142                                                        4430   -3.47    0.00  1.0000
  -4  12   0    4289     146                                                        4528   -3.47    0.00  1.0000
  -4  12   0    4119     144                                                        4353   -3.47    0.00  1.0000
  -4  12   0    4251     141                                                        4489   -3.47    0.00  1.0000
   3 -12   0     896      45                                                         882    0.46    0.00  1.0000
  -3  12   0     874      44                                                         860    0.46    0.00  1.0000
  -3  12   0     853      48                                                         839    0.46    0.00  1.0000
  -3  12   0     846      42                                                         832    0.46    0.00  1.0000
  -2  12   0      72      16                                                          61   -1.32    0.09  1.0000
  -2  12   0      52      12                                                          43   -1.32    0.09  1.0000
  -2  12   0      37      14                                                          29   -1.32    0.09  1.0000
  -1  12   0     625      34                                                         623   -0.08   -0.04  1.0000
  -1  12   0     686      39                                                         684   -0.08   -0.04  1.0000
  -1  12   0     632      41                                                         630   -0.08   -0.04  1.0000
   0  12   0     148      19                                                         111   -3.17   -0.03  1.0000
   0  12   0     163      18                                                         124   -3.17   -0.03  1.0000
   0  12   0     188      19                                                         146   -3.17   -0.03  1.0000
  -1 -12   0     655      37                                                         653    0.08   -0.02  1.0000
   1  12   0     603      35                                                         601    0.08    0.02  1.0000
   1  12   0     623      33                                                         621    0.08    0.02  1.0000
   1  12   0     683      41                                                         681    0.08    0.02  1.0000
  -2 -12   0      66      14                                                          55   -1.32   -0.11  1.0000
   2  12   0      54      11                                                          44   -1.32    0.11  1.0000
   2  12   0      54      14                                                          44   -1.32    0.11  1.0000
   2  12   0      56      16                                                          46   -1.32    0.11  1.0000
   3  12   0     957      47                                                         943   -0.45    0.01  1.0000
   3  12   0     880      39                                                         866   -0.45    0.01  1.0000
   3  12   0     911      43                                                         897   -0.45    0.01  1.0000
   4  12   0    4455     142                                                        4698   -3.46   -0.02  1.0000
   4  12   0    4453     148                                                        4696   -3.46   -0.02  1.0000
   4  12   0    4543     147                                                        4788   -3.46   -0.02  1.0000
   5  12   0    1305      49                                                        1270    0.95   -0.01  1.0000
   5  12   0    1380      56                                                        1344    0.95   -0.01  1.0000
   5  12   0    1327      54                                                        1291    0.95   -0.01  1.0000
   6  12   0    3061     104                                                        3101    0.69   -0.03  1.0000
   6  12   0    3227     100                                                        3268    0.69   -0.03  1.0000
   7  12   0     559      37                                                         589    1.19   -0.01  1.0000
   7  12   0     527      30                                                         556    1.19   -0.01  1.0000
   8  12   0       0       9                                                          -3   -0.75   -0.01  1.0000
   8  12   0       0      13                                                          -9   -0.75   -0.01  1.0000
   9  12   0      93      12                                                          83    0.99    0.01  1.0000
  10  12   0     862      37                                                         883   -0.70   -0.01  1.0000
  -8  13   0      41      20                                                          59   -2.50    0.01  1.0000
  -8  13   0      18      20                                                          31   -2.50    0.01  1.0000
  -7  13   0      52      24                                                          63   -1.35   -0.01  1.0000
  -7  13   0      51      18                                                          62   -1.35   -0.01  1.0000
  -7  13   0      46      19                                                          56   -1.35   -0.01  1.0000
  -6  13   0       9      15                                                           5    1.54    0.02  1.0000
  -6  13   0      35      21                                                          26    1.54    0.02  1.0000
  -5  13   0      96      20                                                         108    1.11   -0.19  1.0000
  -5  13   0     105      24                                                         117    1.11   -0.19  1.0000
  -5  13   0     102      19                                                         114    1.11   -0.19  1.0000
   4 -13   0      16      17                                                          18    1.95    0.16  1.0000
  -4  13   0       1      11                                                         -25    1.95   -0.16  1.0000
  -4  13   0       1      15                                                           1    1.95   -0.16  1.0000
   3 -13   0       0      15                                                         -14    1.11    0.15  1.0000
  -3  13   0      24      18                                                          19    1.11   -0.15  1.0000
  -3  13   0      39      17                                                          32    1.11   -0.15  1.0000
  -3  13   0       9      13                                                           6    1.11   -0.15  1.0000
   2 -13   0       0      15                                                          -6    0.87   -0.03  1.0000
  -2  13   0      10      18                                                          13    0.87    0.03  1.0000
  -2  13   0       0      11                                                          -5    0.87    0.03  1.0000
  -2  13   0      22      16                                                          26    0.87    0.03  1.0000
   1 -13   0       0      14                                                          -8    1.19   -0.06  1.0000
  -1  13   0      17      15                                                          22    1.19    0.06  1.0000
  -1  13   0       0      10                                                         -13    1.19    0.06  1.0000
  -1  13   0      21      18                                                          27    1.19    0.06  1.0000
  -1 -13   0       3      15                                                           6    1.18   -0.02  1.0000
   1  13   0       7      12                                                          11    1.18    0.02  1.0000
   1  13   0       0      17                                                          -4    1.18    0.02  1.0000
   1  13   0       0      13                                                         -15    1.18    0.02  1.0000
   2  13   0       2      18                                                           4   -0.86    0.00  1.0000
   2  13   0       3      11                                                           5   -0.86    0.00  1.0000
   2  13   0       4      14                                                           6   -0.86    0.00  1.0000
   3  13   0       8      18                                                           5    1.13   -0.16  1.0000
   3  13   0       0      13                                                         -16    1.13   -0.16  1.0000
   3  13   0       0      10                                                         -13    1.13   -0.16  1.0000
   4  13   0       1      10                                                         -15   -1.97    0.16  1.0000
   4  13   0       1      17                                                          -6   -1.97    0.16  1.0000
   4  13   0       1      14                                                          -7   -1.97    0.16  1.0000
   5  13   0     113      16                                                         126    1.15   -0.17  1.0000
   5  13   0     130      23                                                         144    1.15   -0.17  1.0000
   5  13   0     105      18                                                         118    1.15   -0.17  1.0000
   6  13   0      17      15                                                          11   -1.52   -0.05  1.0000
   6  13   0       1      10                                                          -4   -1.52   -0.05  1.0000
   6  13   0      13      17                                                           8   -1.52   -0.05  1.0000
   7  13   0      59      16                                                          70   -1.34   -0.01  1.0000
   7  13   0      42      13                                                          52   -1.34   -0.01  1.0000
   8  13   0      42      13                                                          60    2.50    0.01  1.0000
  -6  14   0     602      42                                                         559   -1.72    0.04  1.0000
  -5  14   0       3      24                                                           4   -0.35   -0.02  1.0000
  -5  14   0       0      20                                                          -4   -0.35   -0.02  1.0000
  -5  14   0       0      17                                                          -2   -0.35   -0.02  1.0000
  -4  14   0     559      51                                                         555    0.18    0.07  1.0000
  -4  14   0     453      37                                                         449    0.18    0.07  1.0000
  -4  14   0     498      42                                                         494    0.18    0.07  1.0000
  -3  14   0       1      14                                                         -22    1.74   -0.03  1.0000
  -3  14   0       9      17                                                           6    1.74   -0.03  1.0000
  -2  14   0     778      49                                                         795   -0.57   -0.17  1.0000
  -2  14   0     691      43                                                         707   -0.57   -0.17  1.0000
  -2  14   0     846      57                                                         864   -0.57   -0.17  1.0000
  -1  14   0     453      40                                                         457   -0.18   -0.01  1.0000
  -1  14   0     431      32                                                         435   -0.18   -0.01  1.0000
  -1  14   0     454      46                                                         458   -0.18   -0.01  1.0000
   0  14   0    3474     120                                                        3465   -0.15    0.04  1.0000
   0  14   0    3209     109                                                        3200   -0.15    0.04  1.0000
   0  14   0    3206     115                                                        3197   -0.15    0.04  1.0000
   1  14   0     317      31                                                         320    0.17    0.02  1.0000
   1  14   0     373      39                                                         377    0.17    0.02  1.0000
   1  14   0     388      46                                                         392    0.17    0.02  1.0000
   2  14   0     770      48                                                         786   -0.54   -0.13  1.0000
   2  14   0     807      55                                                         823   -0.54   -0.13  1.0000
   2  14   0     750      41                                                         765   -0.54   -0.13  1.0000
   3  14   0      10      22                                                           7   -1.74    0.05  1.0000
   3  14   0       1      12                                                         -22   -1.74    0.05  1.0000
   3  14   0      17      17                                                          13   -1.74    0.05  1.0000
   4  14   0     487      33                                                         483    0.17    0.08  1.0000
   4  14   0     520      40                                                         516    0.17    0.08  1.0000
   5  14   0      13      13                                                          14    0.35    0.01  1.0000
   5  14   0       3      17                                                           4    0.35    0.01  1.0000
   6  14   0     630      36                                                         586   -1.73    0.01  1.0000
   6  14  -1     179      26                                                         182    0.24    0.02  1.0000
   5  14  -1       5      13                                                           8   -1.07    0.00  1.0000
   5  14  -1       8      17                                                          11   -1.07    0.00  1.0000
   4  14  -1      35      18                                                          30    0.90    0.00  1.0000
   4  14  -1       0      12                                                          -4    0.90    0.00  1.0000
   3  14  -1       3      12                                                          -1   -3.19   -0.11  1.0000
   3  14  -1       3      17                                                          -1   -3.19   -0.11  1.0000
   3  14  -1       0      22                                                           2   -3.19   -0.11  1.0000
   2  14  -1      65      19                                                          59    0.72   -0.04  1.0000
   2  14  -1      44      13                                                          39    0.72   -0.04  1.0000
   2  14  -1      60      23                                                          54    0.72   -0.04  1.0000
   1  14  -1      28      21                                                          18   -2.10   -0.05  1.0000
   1  14  -1      27      17                                                          17   -2.10   -0.05  1.0000
   1  14  -1      21      14                                                          12   -2.10   -0.05  1.0000
   0  14  -1      22      23                                                          19   -0.68   -0.01  1.0000
   0  14  -1      18      14                                                          15   -0.68   -0.01  1.0000
   0  14  -1      34      19                                                          30   -0.68   -0.01  1.0000
  -1  14  -1       9      21                                                          11    0.56    0.06  1.0000
  -1  14  -1       3      13                                                           4    0.56    0.06  1.0000
  -1  14  -1       0      17                                                          -8    0.56    0.06  1.0000
  -2  14  -1      12      15                                                           9    0.78   -0.01  1.0000
  -2  14  -1      16      23                                                          13    0.78   -0.01  1.0000
  -2  14  -1       0      17                                                          -1    0.78   -0.01  1.0000
  -3  14  -1       1      15                                                         -13    1.57    0.53  1.0000
  -3  14  -1       1      17                                                         -21    1.57    0.53  1.0000
  -4  14  -1       0      19                                                          -6   -0.55    0.01  1.0000
  -4  14  -1      16      16                                                          14   -0.55    0.01  1.0000
  -4  14  -1      18      24                                                          16   -0.55    0.01  1.0000
  -5  14  -1      77      22                                                          82    0.49    0.08  1.0000
  -5  14  -1      64      20                                                          68    0.49    0.08  1.0000
  -5  14  -1      75      28                                                          79    0.49    0.08  1.0000
   8  13  -1     971      42                                                        1005    1.04    0.01  1.0000
   7  13  -1     506      29                                                         464   -1.85    0.00  1.0000
   7  13  -1     532      35                                                         489   -1.85    0.00  1.0000
   6  13  -1     189      24                                                         212    1.57   -0.01  1.0000
   6  13  -1     287      25                                                         315    1.57   -0.01  1.0000
   6  13  -1     272      30                                                         300    1.57   -0.01  1.0000
   5  13  -1     453      28                                                         413    1.86    0.06  1.0000
   5  13  -1     426      32                                                         387    1.86    0.06  1.0000
   5  13  -1     530      39                                                         486    1.86    0.06  1.0000
   4  13  -1     685      36                                                         694   -0.33   -0.02  1.0000
   4  13  -1     802      42                                                         812   -0.33   -0.02  1.0000
   4  13  -1     713      44                                                         722   -0.33   -0.02  1.0000
   3  13  -1     623      44                                                         628    0.18   -0.19  1.0000
   3  13  -1     625      39                                                         630    0.18   -0.19  1.0000
   3  13  -1     602      34                                                         607    0.18   -0.19  1.0000
   2  13  -1    1517      64                                                        1515    0.05   -0.02  1.0000
   2  13  -1    1442      61                                                        1440    0.05   -0.02  1.0000
   2  13  -1    1417      56                                                        1415    0.05   -0.02  1.0000
  -2 -13   1    1419      61                                                        1417    0.05    0.02  1.0000
   1  13  -1      53      17                                                          62   -1.10   -0.02  1.0000
   1  13  -1      43      14                                                          51   -1.10   -0.02  1.0000
   1  13  -1      45      19                                                          53   -1.10   -0.02  1.0000
  -1 -13   1      34      16                                                          41   -1.10    0.02  1.0000
   0  13  -1    3487     119                                                        3530    0.69    0.02  1.0000
   0  13  -1    3414     117                                                        3456    0.69    0.02  1.0000
   0  13  -1    3376     112                                                        3418    0.69    0.02  1.0000
   0 -13   1    3443     117                                                        3485    0.69   -0.02  1.0000
  -1  13  -1      85      18                                                          67   -1.96   -0.10  1.0000
  -1  13  -1      93      19                                                          74   -1.96   -0.10  1.0000
  -1  13  -1      94      14                                                          75   -1.96   -0.10  1.0000
   1 -13   1      69      16                                                          53   -1.96    0.10  1.0000
  -2  13  -1    1774      65                                                        1653    2.81    0.00  1.0000
  -2  13  -1    1877      72                                                        1753    2.81    0.00  1.0000
  -2  13  -1    1791      69                                                        1670    2.81    0.00  1.0000
   2 -13   1    1722      68                                                        1603    2.81    0.00  1.0000
  -3  13  -1     608      38                                                         525    3.36    0.00  1.0000
  -3  13  -1     586      35                                                         505    3.36    0.00  1.0000
  -3  13  -1     525      41                                                         448    3.36    0.00  1.0000
   3 -13   1     592      41                                                         510    3.36    0.00  1.0000
  -4  13  -1     338      34                                                         302    1.93    0.02  1.0000
  -4  13  -1     310      30                                                         276    1.93    0.02  1.0000
   4 -13   1     378      35                                                         340    1.93   -0.02  1.0000
  -5  13  -1     610      45                                                         639    1.12    0.10  1.0000
  -5  13  -1     629      41                                                         659    1.12    0.10  1.0000
  -5  13  -1     672      50                                                         703    1.12    0.10  1.0000
  -6  13  -1     439      38                                                         421   -0.86    0.03  1.0000
  -6  13  -1     441      46                                                         423   -0.86    0.03  1.0000
  -6  13  -1     396      35                                                         379   -0.86    0.03  1.0000
  -7  13  -1     103      23                                                         106   -0.27   -0.02  1.0000
  -7  13  -1     130      27                                                         133   -0.27   -0.02  1.0000
  -7  13  -1     122      22                                                         125   -0.27   -0.02  1.0000
  -8  13  -1     261      38                                                         258   -0.15   -0.03  1.0000
  -8  13  -1     154      25                                                         152   -0.15   -0.03  1.0000
  10  12  -1     118      14                                                         123   -0.48    0.00  1.0000
   9  12  -1      94      12                                                          80    1.43    0.00  1.0000
   8  12  -1       1      13                                                           2    1.31    0.00  1.0000
   8  12  -1       2       9                                                           4    1.31    0.00  1.0000
   8  12  -1       2      12                                                           5    1.31    0.00  1.0000
   7  12  -1      78      14                                                          67   -1.29    0.01  1.0000
   7  12  -1      87      16                                                          75   -1.29    0.01  1.0000
   7  12  -1      85      12                                                          73   -1.29    0.01  1.0000
   6  12  -1      62      16                                                          36    3.59   -0.02  1.0000
   6  12  -1      77      14                                                          48    3.59   -0.02  1.0000
   6  12  -1      86      13                                                          55    3.59   -0.02  1.0000
   5  12  -1      40      16                                                          57   -2.43    0.13  1.0000
   5  12  -1      39      15                                                          56   -2.43    0.13  1.0000
   5  12  -1      28      12                                                          43   -2.43    0.13  1.0000
   4  12  -1     246      33                                                         296    2.93    0.02  1.0000
   4  12  -1     241      24                                                         291    2.93    0.02  1.0000
   4  12  -1     246      29                                                         296    2.93    0.02  1.0000
   3  12  -1      15      15                                                          14   -0.51    0.07  1.0000
   3  12  -1       0      11                                                          -7   -0.51    0.07  1.0000
   3  12  -1       0       9                                                          -7   -0.51    0.07  1.0000
   2  12  -1      29      14                                                          35   -1.05    0.01  1.0000
   2  12  -1      45      11                                                          53   -1.05    0.01  1.0000
   2  12  -1      17      12                                                          22   -1.05    0.01  1.0000
  -2 -12   1      32      13                                                          38   -1.05   -0.01  1.0000
   1  12  -1      30      13                                                          27   -0.47   -0.08  1.0000
   1  12  -1      22      10                                                          20   -0.47   -0.08  1.0000
   1  12  -1      41      15                                                          38   -0.47   -0.08  1.0000
  -1 -12   1      36      13                                                          33   -0.47    0.08  1.0000
   0  12  -1      55      15                                                          96   -4.57   -0.03  1.0000
   0  12  -1      79      18                                                         127   -4.57   -0.03  1.0000
   0  12  -1      74      19                                                         120   -4.57   -0.03  1.0000
  -1  12  -1     196      26                                                         207   -0.77    0.11  1.0000
  -1  12  -1     176      21                                                         187   -0.77    0.11  1.0000
  -1  12  -1     184      28                                                         195   -0.77    0.11  1.0000
  -2  12  -1     315      24                                                         267   -2.70    0.01  1.0000
  -2  12  -1     294      31                                                         248   -2.70    0.01  1.0000
  -2  12  -1     349      28                                                         299   -2.70    0.01  1.0000
  -3  12  -1      91      15                                                          80   -1.13    0.09  1.0000
  -3  12  -1      96      17                                                          85   -1.13    0.09  1.0000
  -3  12  -1      88      19                                                          77   -1.13    0.09  1.0000
   3 -12   1      92      17                                                          81   -1.13   -0.09  1.0000
  -4  12  -1     235      28                                                         223    0.76    0.04  1.0000
  -4  12  -1     213      26                                                         202    0.76    0.04  1.0000
   4 -12   1     254      30                                                         242    0.76   -0.04  1.0000
  -5  12  -1      16      13                                                           6    3.02    0.12  1.0000
  -5  12  -1      22      12                                                          10    3.02    0.12  1.0000
   5 -12   1       2      13                                                         -15    3.02   -0.12  1.0000
  -6  12  -1       0      12                                                           3    2.82    0.05  1.0000
  -6  12  -1       2      17                                                         -15    2.82    0.05  1.0000
  -6  12  -1      12      15                                                          24    2.82    0.05  1.0000
   6 -12   1       2      16                                                         -10    2.82   -0.05  1.0000
  -7  12  -1      64      19                                                          51   -1.61    0.00  1.0000
  -7  12  -1     130      20                                                         112   -1.61    0.00  1.0000
  -7  12  -1     117      18                                                         100   -1.61    0.00  1.0000
   7 -12   1     107      20                                                          90   -1.61    0.00  1.0000
  -8  12  -1      66      17                                                          47    2.41   -0.03  1.0000
  -8  12  -1      48      16                                                          32    2.41   -0.03  1.0000
   8 -12   1      68      19                                                          49    2.41    0.03  1.0000
  -9  12  -1     329      38                                                         298    1.67    0.01  1.0000
  -9  12  -1     307      37                                                         277    1.67    0.01  1.0000
 -10  12  -1     244      31                                                         260    0.98    0.02  1.0000
 -10  12  -1     273      39                                                         290    0.98    0.02  1.0000
  11  11  -1      38       9                                                          41   -0.47   -0.01  1.0000
  11  11  -1      42      16                                                          45   -0.47   -0.01  1.0000
  10  11  -1     697      34                                                         680    0.63    0.04  1.0000
  10  11  -1     753      30                                                         735    0.63    0.04  1.0000
   9  11  -1     219      17                                                         172   -3.27    0.01  1.0000
   8  11  -1      80      10                                                          74    0.67    0.00  1.0000
   8  11  -1      64      13                                                          59    0.67    0.00  1.0000
   7  11  -1      11       8                                                           8    0.85    0.03  1.0000
   7  11  -1      14      12                                                          11    0.85    0.03  1.0000
   6  11  -1    8531     249                                                        8712    1.88   -0.02  1.0000
   6  11  -1    8469     245                                                        8650    1.88   -0.02  1.0000
   5  11  -1      33      13                                                          30    0.47   -0.03  1.0000
   5  11  -1      16      11                                                          14    0.47   -0.03  1.0000
   5  11  -1      30       9                                                          27    0.47   -0.03  1.0000
   4  11  -1    8716     242                                                        8459    2.67    0.00  1.0000
   4  11  -1    8895     246                                                        8635    2.67    0.00  1.0000
   4  11  -1    8749     250                                                        8491    2.67    0.00  1.0000
   3  11  -1      62      10                                                          50    1.59    0.01  1.0000
   3  11  -1      79      13                                                          65    1.59    0.01  1.0000
   3  11  -1      62      13                                                          50    1.59    0.01  1.0000
  -3 -11   1      56      11                                                          44    1.59   -0.01  1.0000
   2  11  -1    1101      53                                                        1316    5.94    0.03  1.0000
   2  11  -1    1159      51                                                        1379    5.94    0.03  1.0000
   2  11  -1    1163      54                                                        1383    5.94    0.03  1.0000
  -2 -11   1    1153      53                                                        1372    5.94   -0.03  1.0000
   1  11  -1     234      21                                                         194   -2.66   -0.02  1.0000
   1  11  -1     230      19                                                         190   -2.66   -0.02  1.0000
   1  11  -1     233      25                                                         193   -2.66   -0.02  1.0000
  -1 -11   1     223      22                                                         184   -2.66    0.02  1.0000
   0  11  -1     130      18                                                         144    1.18    0.00  1.0000
   0  11  -1     125      18                                                         139    1.18    0.00  1.0000
   0  11  -1     104      16                                                         117    1.18    0.00  1.0000
  -1  11  -1     767      39                                                         760    0.24   -0.02  1.0000
  -1  11  -1     774      37                                                         767    0.24   -0.02  1.0000
  -1  11  -1     718      35                                                         711    0.24   -0.02  1.0000
  -2  11  -1     657      37                                                         675    0.66   -0.03  1.0000
  -2  11  -1     681      39                                                         699    0.66   -0.03  1.0000
  -2  11  -1     685      34                                                         703    0.66   -0.03  1.0000
  -3  11  -1     216      23                                                         238    1.38    0.02  1.0000
  -3  11  -1     235      24                                                         258    1.38    0.02  1.0000
  -3  11  -1     217      26                                                         239    1.38    0.02  1.0000
  -4  11  -1    6863     208                                                        6852    0.13   -0.03  1.0000
  -4  11  -1    7164     206                                                        7153    0.13   -0.03  1.0000
  -4  11  -1    6784     211                                                        6773    0.13   -0.03  1.0000
  -5  11  -1      12      12                                                          41    5.60   -0.04  1.0000
  -5  11  -1       3      14                                                          21    5.60   -0.04  1.0000
  -5  11  -1      19      14                                                          52    5.60   -0.04  1.0000
  -6  11  -1    4183     137                                                        4188    0.07    0.03  1.0000
  -6  11  -1    4099     133                                                        4104    0.07    0.03  1.0000
  -7  11  -1       3      12                                                           4    0.79    0.03  1.0000
  -7  11  -1      18      13                                                          22    0.79    0.03  1.0000
   7 -11   1       1      14                                                           2    0.79   -0.03  1.0000
  -8  11  -1      60      16                                                          53   -0.91   -0.01  1.0000
  -8  11  -1      20      15                                                          16   -0.91   -0.01  1.0000
   8 -11   1      74      19                                                          66   -0.91    0.01  1.0000
  -9  11  -1       0      15                                                           8   -4.49    0.03  1.0000
  -9  11  -1       0      15                                                           9   -4.49    0.03  1.0000
   9 -11   1      20      16                                                          46   -4.49   -0.03  1.0000
 -10  11  -1    1402      67                                                        1439   -0.96   -0.01  1.0000
 -10  11  -1    1359      66                                                        1396   -0.96   -0.01  1.0000
  10 -11   1    1581      70                                                        1621   -0.96    0.01  1.0000
 -11  11  -1       1      19                                                           0    1.90   -0.02  1.0000
 -11  11  -1      13      19                                                          21    1.90   -0.02  1.0000
  11 -11   1      21      24                                                          31    1.90    0.02  1.0000
  12  10  -1      94      13                                                         118   -2.23   -0.02  1.0000
  12  10  -1      91      14                                                         114   -2.23   -0.02  1.0000
  11  10  -1      11       9                                                          27    3.74    0.00  1.0000
  11  10  -1      17       8                                                          37    3.74    0.00  1.0000
  10  10  -1     241      17                                                         253    0.70    0.00  1.0000
  10  10  -1     236      20                                                         247    0.70    0.00  1.0000
  10  10  -1     220      25                                                         231    0.70    0.00  1.0000
   9  10  -1      38       7                                                          19   -3.40    0.01  1.0000
   8  10  -1     300      22                                                         245    3.23    0.00  1.0000
   8  10  -1     344      18                                                         285    3.23    0.00  1.0000
   7  10  -1      17      11                                                          39   -4.02    0.00  1.0000
   7  10  -1      27       9                                                          53   -4.02    0.00  1.0000
   6  10  -1     599      33                                                         771    6.35   -0.02  1.0000
   6  10  -1     712      38                                                         899    6.35   -0.02  1.0000
   5  10  -1      17       9                                                          13   -0.95    0.02  1.0000
   5  10  -1      16       7                                                          12   -0.95    0.02  1.0000
   4  10  -1     166      15                                                         149    1.31   -0.04  1.0000
   4  10  -1     132      15                                                         117    1.31   -0.04  1.0000
   3  10  -1      16       9                                                           4    3.94    0.04  1.0000
   3  10  -1      45       7                                                          22    3.94    0.04  1.0000
   3  10  -1      24      10                                                           8    3.94    0.04  1.0000
  -3 -10   1       9       8                                                           1    3.94   -0.04  1.0000
   2  10  -1      47       9                                                          54   -0.93    0.03  1.0000
   2  10  -1      40      11                                                          46   -0.93    0.03  1.0000
   2  10  -1      32      10                                                          38   -0.93    0.03  1.0000
  -2 -10   1      51      11                                                          58   -0.93   -0.03  1.0000
   1  10  -1      79      12                                                          44    4.34    0.01  1.0000
   1  10  -1      80      10                                                          45    4.34    0.01  1.0000
   1  10  -1      95      12                                                          56    4.34    0.01  1.0000
  -1 -10   1      78      11                                                          43    4.34   -0.01  1.0000
   0  10  -1     124      14                                                          96   -2.60    0.02  1.0000
   0  10  -1     117      15                                                          90   -2.60    0.02  1.0000
   0  10  -1     112      12                                                          85   -2.60    0.02  1.0000
   0 -10   1     109      13                                                          83   -2.60   -0.02  1.0000
  -1  10  -1     116      14                                                          80   -3.52    0.00  1.0000
  -1  10  -1     183      18                                                         137   -3.52    0.00  1.0000
  -1  10  -1     176      15                                                         131   -3.52    0.00  1.0000
   1 -10   1     129      14                                                          91   -3.52    0.00  1.0000
  -2  10  -1       6      11                                                          51   -9.22    0.04  1.0000
  -2  10  -1       3      11                                                          42   -9.22    0.04  1.0000
  -2  10  -1       3       9                                                          43   -9.22    0.04  1.0000
   2 -10   1       4      11                                                          44   -9.22   -0.04  1.0000
  -3  10  -1      29      11                                                          64   -5.03    0.04  1.0000
  -3  10  -1      20      12                                                          50   -5.03    0.04  1.0000
  -3  10  -1      29      13                                                          64   -5.03    0.04  1.0000
   3 -10   1      24      13                                                          57   -5.03   -0.04  1.0000
  -4  10  -1      44      10                                                          26   -2.98    0.01  1.0000
  -4  10  -1      21      11                                                           9   -2.98    0.01  1.0000
  -4  10  -1      45      11                                                          27   -2.98    0.01  1.0000
   4 -10   1      59      11                                                          38   -2.98   -0.01  1.0000
  -5  10  -1     332      25                                                         285   -2.57    0.01  1.0000
  -5  10  -1     353      23                                                         305   -2.57    0.01  1.0000
   5 -10   1     367      26                                                         318   -2.57   -0.01  1.0000
  -6  10  -1     573      35                                                         580   -0.28   -0.01  1.0000
  -6  10  -1     617      36                                                         624   -0.28   -0.01  1.0000
   6 -10   1     662      36                                                         669   -0.28    0.01  1.0000
  -7  10  -1       3      11                                                          25    6.54    0.02  1.0000
  -7  10  -1       3      11                                                          27    6.54    0.02  1.0000
   7 -10   1       1      12                                                          19    6.54   -0.02  1.0000
  -8  10  -1     407      34                                                         506    4.47   -0.01  1.0000
  -8  10  -1     438      35                                                         540    4.47   -0.01  1.0000
  -9  10  -1      61      17                                                          65   -0.50    0.00  1.0000
  -9  10  -1      33      13                                                          36   -0.50    0.00  1.0000
 -10  10  -1     133      19                                                         119    1.24   -0.01  1.0000
 -10  10  -1     114      20                                                         101    1.24   -0.01  1.0000
  10 -10   1     141      22                                                         126    1.24    0.01  1.0000
 -11  10  -1      23      16                                                          30   -1.35   -0.01  1.0000
 -11  10  -1      29      17                                                          37   -1.35   -0.01  1.0000
  11 -10   1      13      18                                                          18   -1.35    0.01  1.0000
 -12  10  -1      75      22                                                          70   -0.60   -0.02  1.0000
 -12  10  -1     109      20                                                         103   -0.60   -0.02  1.0000
  12 -10   1      90      25                                                          84   -0.60    0.02  1.0000
 -13  -9   1     130      15                                                         112   -1.61   -0.01  1.0000
  12   9  -1     404      27                                                         407    0.15   -0.02  1.0000
  12   9  -1     414      18                                                         417    0.15   -0.02  1.0000
  12   9  -1     415      19                                                         418    0.15   -0.02  1.0000
 -12  -9   1     459      28                                                         462    0.15    0.02  1.0000
  11   9  -1      75       9                                                          73    0.24   -0.01  1.0000
  11   9  -1      78       9                                                          76    0.24   -0.01  1.0000
  11   9  -1      65      13                                                          63    0.24   -0.01  1.0000
 -11  -9   1      81      13                                                          79    0.24    0.01  1.0000
  10   9  -1    3763     109                                                        3712    0.81    0.00  1.0000
  10   9  -1    3736     107                                                        3685    0.81    0.00  1.0000
  10   9  -1    3820     115                                                        3768    0.81    0.00  1.0000
 -10  -9   1    3798     113                                                        3746    0.81    0.00  1.0000
   9   9  -1     465      22                                                         499    1.50    0.03  1.0000
   8   9  -1    2218      73                                                        2267    1.00    0.01  1.0000
   8   9  -1    2356      71                                                        2407    1.00    0.01  1.0000
   7   9  -1      41      11                                                          76   -4.47    0.01  1.0000
   7   9  -1      55      11                                                          95   -4.47    0.01  1.0000
   6   9  -1     712      31                                                         735    0.80    0.04  1.0000
   6   9  -1     703      29                                                         725    0.80    0.04  1.0000
   5   9  -1      23       8                                                          19   -0.82    0.01  1.0000
   5   9  -1      28       6                                                          24   -0.82    0.01  1.0000
   4   9  -1    1062      35                                                         828    7.34   -0.02  1.0000
   4   9  -1    1127      33                                                         886    7.34   -0.02  1.0000
   3   9  -1    1415      49                                                        1408    0.19    0.00  1.0000
   3   9  -1    1462      51                                                        1454    0.19    0.00  1.0000
  -3  -9   1    1416      50                                                        1409    0.19    0.00  1.0000
   2   9  -1    3275     102                                                        3296   -0.35    0.00  1.0000
   2   9  -1    3252      98                                                        3273   -0.35    0.00  1.0000
   2   9  -1    3174     100                                                        3195   -0.35    0.00  1.0000
  -2  -9   1    3149      99                                                        3169   -0.35    0.00  1.0000
   1   9  -1    1576      61                                                        1727    3.58    0.02  1.0000
   1   9  -1    1604      61                                                        1757    3.58    0.02  1.0000
   1   9  -1    1627      59                                                        1781    3.58    0.02  1.0000
  -1  -9   1    1656      61                                                        1811    3.58   -0.02  1.0000
   0   9  -1   12024     376                                                       12722    6.04   -0.01  1.0000
   0   9  -1   12597     368                                                       13311    6.04   -0.01  1.0000
   0   9  -1   12469     366                                                       13180    6.04   -0.01  1.0000
   0  -9   1   12603     367                                                       13318    6.04    0.01  1.0000
  -1   9  -1     234      19                                                         180    3.62    0.00  1.0000
  -1   9  -1     224      16                                                         171    3.62    0.00  1.0000
  -1   9  -1     210      17                                                         159    3.62    0.00  1.0000
   1  -9   1     229      17                                                         176    3.62    0.00  1.0000
  -2   9  -1    4711     144                                                        4696    0.21    0.00  1.0000
  -2   9  -1    4798     140                                                        4783    0.21    0.00  1.0000
  -2   9  -1    4695     142                                                        4680    0.21    0.00  1.0000
   2  -9   1    4628     140                                                        4613    0.21    0.00  1.0000
  -3   9  -1     107      16                                                         157    4.21    0.01  1.0000
  -3   9  -1     102      17                                                         151    4.21    0.01  1.0000
   3  -9   1     100      18                                                         148    4.21   -0.01  1.0000
  -4   9  -1     759      35                                                         756    0.10    0.03  1.0000
  -4   9  -1     761      36                                                         758    0.10    0.03  1.0000
   4  -9   1     832      35                                                         829    0.10   -0.03  1.0000
  -5   9  -1      25       8                                                          20   -1.02   -0.02  1.0000
  -5   9  -1       5       8                                                           3   -1.02   -0.02  1.0000
   5  -9   1      25       9                                                          20   -1.02    0.02  1.0000
  -6   9  -1    1576      61                                                        1661    2.03   -0.02  1.0000
  -6   9  -1    1293      57                                                        1370    2.03   -0.02  1.0000
   6  -9   1    1481      58                                                        1563    2.03    0.02  1.0000
  -7   9  -1     124      19                                                         130   -0.52    0.04  1.0000
  -7   9  -1     105      16                                                         111   -0.52    0.04  1.0000
   7  -9   1     117      17                                                         123   -0.52   -0.04  1.0000
  -8   9  -1     699      36                                                         638   -2.27   -0.01  1.0000
  -8   9  -1     680      36                                                         620   -2.27   -0.01  1.0000
   8  -9   1     659      35                                                         600   -2.27    0.01  1.0000
  -9   9  -1     484      31                                                         426    2.60    0.03  1.0000
  -9   9  -1     436      30                                                         381    2.60    0.03  1.0000
   9  -9   1     474      31                                                         417    2.60   -0.03  1.0000
 -10   9  -1    2806     100                                                        2751    1.00   -0.01  1.0000
 -10   9  -1    2732      97                                                        2678    1.00   -0.01  1.0000
  10  -9   1    2946      97                                                        2890    1.00    0.01  1.0000
 -11   9  -1       4      14                                                          -4   -3.97   -0.01  1.0000
 -11   9  -1      18      13                                                           6   -3.97   -0.01  1.0000
 -12   9  -1      68      16                                                          49   -2.35    0.01  1.0000
 -12   9  -1     113      22                                                          89   -2.35    0.01  1.0000
 -13   9  -1       0      16                                                         -17    0.85   -0.02  1.0000
 -13   9  -1      28      21                                                          33    0.85   -0.02  1.0000
  13  -9   1      14      21                                                          17    0.85    0.02  1.0000
  13   8  -1       3      10                                                          -3    3.19   -0.01  1.0000
 -13  -8   1      32      11                                                          16    3.19    0.01  1.0000
  12   8  -1     331      15                                                         314   -0.93    0.00  1.0000
  12   8  -1     348      23                                                         330   -0.93    0.00  1.0000
  12   8  -1     311      15                                                         294   -0.93    0.00  1.0000
 -12  -8   1     318      23                                                         301   -0.93    0.00  1.0000
  11   8  -1      21      10                                                          38   -3.01   -0.01  1.0000
  11   8  -1      19       7                                                          35   -3.01   -0.01  1.0000
  11   8  -1      10       6                                                          23   -3.01   -0.01  1.0000
 -11  -8   1       8       9                                                          20   -3.01    0.01  1.0000
  10   8  -1     457      25                                                         448    0.43   -0.01  1.0000
  10   8  -1     418      19                                                         409    0.43   -0.01  1.0000
  10   8  -1     425      20                                                         416    0.43   -0.01  1.0000
 -10  -8   1     441      24                                                         432    0.43    0.01  1.0000
   9   8  -1       1       7                                                           1   -0.15   -0.02  1.0000
   9   8  -1       0       5                                                          -3   -0.15   -0.02  1.0000
  -9  -8   1       1       7                                                           1   -0.15    0.02  1.0000
   8   8  -1       4       7                                                          54   10.52    0.02  1.0000
  -8  -8   1       2       9                                                          49   10.52   -0.02  1.0000
   7   8  -1     136      12                                                          99   -3.30    0.00  1.0000
   7   8  -1     140      10                                                         102   -3.30    0.00  1.0000
  -7  -8   1     141      13                                                         103   -3.30    0.00  1.0000
   6   8  -1     198      12                                                         170    1.97   -0.02  1.0000
   6   8  -1     173      15                                                         147    1.97   -0.02  1.0000
   5   8  -1     649      31                                                         758   -3.94    0.00  1.0000
   5   8  -1     651      29                                                         760   -3.94    0.00  1.0000
   4   8  -1     148      13                                                         193    3.32    0.00  1.0000
   4   8  -1     137      16                                                         180    3.32    0.00  1.0000
   3   8  -1      41      10                                                          80    4.96    0.04  1.0000
   3   8  -1      59      13                                                         105    4.96    0.04  1.0000
  -3  -8   1      47      12                                                          89    4.96   -0.04  1.0000
   2   8  -1      77      11                                                          75    0.27    0.01  1.0000
   2   8  -1      51       9                                                          49    0.27    0.01  1.0000
  -2  -8   1      54       9                                                          52    0.27   -0.01  1.0000
   1   8  -1     362      23                                                         497    6.28   -0.03  1.0000
   1   8  -1     356      24                                                         490    6.28   -0.03  1.0000
   1   8  -1     354      24                                                         487    6.28   -0.03  1.0000
  -1  -8   1     345      24                                                         477    6.28    0.03  1.0000
   0   8  -1     387      26                                                         593   -8.99    0.03  1.0000
   0   8  -1     410      28                                                         621   -8.99    0.03  1.0000
   0   8  -1     365      28                                                         565   -8.99    0.03  1.0000
   0  -8   1     406      28                                                         616   -8.99   -0.03  1.0000
  -1   8  -1    1099      45                                                        1187   -2.52   -0.01  1.0000
  -1   8  -1    1118      45                                                        1207   -2.52   -0.01  1.0000
  -1   8  -1    1140      43                                                        1230   -2.52   -0.01  1.0000
   1  -8   1    1077      44                                                        1165   -2.52    0.01  1.0000
  -2   8  -1    1412      42                                                        1145   -7.20   -0.03  1.0000
  -2   8  -1    1343      43                                                        1083   -7.20   -0.03  1.0000
   2  -8   1    1383      42                                                        1119   -7.20    0.03  1.0000
  -3   8  -1      77      14                                                         119   -4.09   -0.01  1.0000
  -3   8  -1      83      13                                                         126   -4.09   -0.01  1.0000
   3  -8   1      50      11                                                          85   -4.09    0.01  1.0000
  -4   8  -1     168      28                                                         524  -19.10   -0.01  1.0000
  -4   8  -1     188      28                                                         559  -19.10   -0.01  1.0000
   4  -8   1     188      27                                                         559  -19.10    0.01  1.0000
  -5   8  -1      82      11                                                          76   -0.65    0.00  1.0000
  -5   8  -1     132      15                                                         124   -0.65    0.00  1.0000
   5  -8   1     100      14                                                          93   -0.65    0.00  1.0000
  -6   8  -1     355      23                                                         342   -0.65   -0.03  1.0000
  -6   8  -1     304      22                                                         292   -0.65   -0.03  1.0000
   6  -8   1     361      23                                                         348   -0.65    0.03  1.0000
  -7   8  -1      58      12                                                          68   -1.19    0.01  1.0000
  -7   8  -1     103      17                                                         116   -1.19    0.01  1.0000
   7  -8   1      89      14                                                         101   -1.19   -0.01  1.0000
  -8   8  -1     385      26                                                         328    2.90    0.01  1.0000
  -8   8  -1     375      25                                                         319    2.90    0.01  1.0000
   8  -8   1     406      25                                                         348    2.90   -0.01  1.0000
  -9   8  -1      44      10                                                           8    7.37    0.04  1.0000
  -9   8  -1      34      11                                                           4    7.37    0.04  1.0000
   9  -8   1      51      12                                                          11    7.37   -0.04  1.0000
 -10   8  -1    1089      54                                                        1153    1.83    0.02  1.0000
 -10   8  -1    1127      53                                                        1192    1.83    0.02  1.0000
  10  -8   1    1207      53                                                        1274    1.83   -0.02  1.0000
 -11   8  -1     240      29                                                         285    2.65   -0.01  1.0000
 -11   8  -1     212      28                                                         254    2.65   -0.01  1.0000
  11  -8   1     275      30                                                         323    2.65    0.01  1.0000
 -12   8  -1     872      46                                                         845    0.90   -0.01  1.0000
 -12   8  -1     747      43                                                         722    0.90   -0.01  1.0000
  12  -8   1     853      46                                                         826    0.90    0.01  1.0000
 -13   8  -1      11      14                                                           1   -4.55    0.01  1.0000
 -13   8  -1      44      18                                                          18   -4.55    0.01  1.0000
  13  -8   1      25      17                                                           7   -4.55   -0.01  1.0000
 -14   8  -1     449      43                                                         417   -1.47   -0.03  1.0000
 -14   8  -1     473      40                                                         440   -1.47   -0.03  1.0000
  14   7  -1    1279      48                                                        1302    0.61   -0.04  1.0000
 -14  -7   1    1251      48                                                        1274    0.61    0.04  1.0000
  13   7  -1     213      19                                                         149    4.61   -0.02  1.0000
 -13  -7   1     220      19                                                         155    4.61    0.02  1.0000
  12   7  -1     162      12                                                         198    2.58   -0.01  1.0000
  12   7  -1     177      18                                                         214    2.58   -0.01  1.0000
  12   7  -1     151      12                                                         186    2.58   -0.01  1.0000
 -12  -7   1     136      18                                                         169    2.58    0.01  1.0000
  11   7  -1      42       7                                                          50    1.14    0.01  1.0000
  11   7  -1      38       7                                                          46    1.14    0.01  1.0000
  11   7  -1      41       9                                                          49    1.14    0.01  1.0000
 -11  -7   1      44      10                                                          52    1.14   -0.01  1.0000
  10   7  -1    2249      76                                                        2371   -2.44    0.00  1.0000
  10   7  -1    2291      72                                                        2414   -2.44    0.00  1.0000
  10   7  -1    2266      71                                                        2388   -2.44    0.00  1.0000
 -10  -7   1    2411      76                                                        2537   -2.44    0.00  1.0000
   9   7  -1      24       7                                                           4   -5.58   -0.05  1.0000
   9   7  -1       8       4                                                          -2   -5.58   -0.05  1.0000
   9   7  -1      19       5                                                           2   -5.58   -0.05  1.0000
  -9  -7   1      15       6                                                           1   -5.58    0.05  1.0000
   8   7  -1      99      10                                                         138    3.46    0.03  1.0000
  -8  -7   1      97      13                                                         136    3.46   -0.03  1.0000
   7   7  -1      54       6                                                          47   -0.95   -0.03  1.0000
   7   7  -1      53       7                                                          46   -0.95   -0.03  1.0000
  -7  -7   1      44       7                                                          38   -0.95    0.03  1.0000
   6   7  -1    6349     206                                                        7092    8.72    0.01  1.0000
   6   7  -1    6548     205                                                        7302    8.72    0.01  1.0000
  -6  -7   1    6914     207                                                        7688    8.72   -0.01  1.0000
   5   7  -1     534      24                                                         568   -1.38   -0.05  1.0000
   5   7  -1     530      22                                                         564   -1.38   -0.05  1.0000
   4   7  -1    8162     253                                                        9075   -9.47   -0.03  1.0000
   4   7  -1    8297     255                                                        9217   -9.47   -0.03  1.0000
   3   7  -1     113       9                                                          87   -2.53   -0.07  1.0000
   3   7  -1     109      11                                                          83   -2.53   -0.07  1.0000
  -3  -7   1      90      10                                                          67   -2.53    0.07  1.0000
   2   7  -1      32       5                                                          27   -0.92   -0.06  1.0000
   2   7  -1       0       4                                                          -1   -0.92   -0.06  1.0000
  -2  -7   1       5       4                                                           3   -0.92    0.06  1.0000
   1   7  -1     102       8                                                          48    6.10   -0.05  1.0000
   1   7  -1     140       9                                                          75    6.10   -0.05  1.0000
   1   7  -1     108       7                                                          52    6.10   -0.05  1.0000
   0   7  -1   16689     453                                                       15775   -6.90   -0.01  1.0000
   0   7  -1   17289     441                                                       16358   -6.90   -0.01  1.0000
   0   7  -1   17156     443                                                       16229   -6.90   -0.01  1.0000
   0  -7   1   16768     442                                                       15852   -6.90    0.01  1.0000
  -1   7  -1     106      10                                                          66    4.13    0.01  1.0000
  -1   7  -1     135      12                                                          90    4.13    0.01  1.0000
  -1   7  -1     112      10                                                          71    4.13    0.01  1.0000
   1  -7   1     128      11                                                          84    4.13   -0.01  1.0000
  -2   7  -1     324      25                                                         585   11.89    0.04  1.0000
  -2   7  -1     302      25                                                         555   11.89    0.04  1.0000
   2  -7   1     292      25                                                         541   11.89   -0.04  1.0000
  -3   7  -1     121      13                                                         156    2.87   -0.03  1.0000
  -3   7  -1     112      14                                                         146    2.87   -0.03  1.0000
   3  -7   1     122      14                                                         157    2.87    0.03  1.0000
  -4   7  -1   11202     292                                                       10353    7.88    0.00  1.0000
  -4   7  -1   11099     300                                                       10254    7.88    0.00  1.0000
   4  -7   1   11424     292                                                       10566    7.88    0.00  1.0000
  -5   7  -1     305      24                                                         411    5.42   -0.02  1.0000
  -5   7  -1     318      23                                                         426    5.42   -0.02  1.0000
   5  -7   1     321      23                                                         430    5.42    0.02  1.0000
  -6   7  -1    5215     151                                                        4889   -4.41   -0.02  1.0000
  -6   7  -1    5338     148                                                        5008   -4.41   -0.02  1.0000
   6  -7   1    5266     147                                                        4939   -4.41    0.02  1.0000
  -7   7  -1     121      18                                                         189   -5.33    0.01  1.0000
  -7   7  -1     147      19                                                         222   -5.33    0.01  1.0000
   7  -7   1     133      19                                                         204   -5.33   -0.01  1.0000
  -8   7  -1     108      18                                                         172    5.21   -0.01  1.0000
  -8   7  -1     124      20                                                         192    5.21   -0.01  1.0000
   8  -7   1      91      18                                                         150    5.21    0.01  1.0000
  -9   7  -1     432      26                                                         306   -6.31    0.02  1.0000
  -9   7  -1     521      27                                                         382   -6.31    0.02  1.0000
   9  -7   1     520      26                                                         381   -6.31   -0.02  1.0000
 -10   7  -1    3768     117                                                        3846   -1.22   -0.01  1.0000
 -10   7  -1    3417     119                                                        3491   -1.22   -0.01  1.0000
  10  -7   1    3435     114                                                        3509   -1.22    0.01  1.0000
 -11   7  -1     162      26                                                         247    5.76    0.04  1.0000
 -11   7  -1     141      25                                                         221    5.76    0.04  1.0000
  11  -7   1     148      26                                                         230    5.76   -0.04  1.0000
 -12   7  -1     647      38                                                         621   -1.00    0.00  1.0000
 -12   7  -1     702      41                                                         675   -1.00    0.00  1.0000
  12  -7   1     681      38                                                         654   -1.00    0.00  1.0000
 -13   7  -1       1      13                                                         -12    1.67    0.00  1.0000
 -13   7  -1       4      16                                                           8    1.67    0.00  1.0000
  13  -7   1      10      16                                                          16    1.67    0.00  1.0000
 -14   7  -1    1152      56                                                        1053   -2.87   -0.01  1.0000
 -14   7  -1    1176      56                                                        1076   -2.87   -0.01  1.0000
  14  -7   1    1266      57                                                        1162   -2.87    0.01  1.0000
 -15   7  -1     118      24                                                         129   -0.93    0.02  1.0000
 -15   7  -1     116      26                                                         127   -0.93    0.02  1.0000
  15  -7   1     136      27                                                         148   -0.93   -0.02  1.0000
  15   6  -1      16      11                                                          14   -0.45    0.00  1.0000
 -15  -6   1       4      12                                                           3   -0.45    0.00  1.0000
  14   6  -1     345      23                                                         331   -0.71    0.00  1.0000
 -14  -6   1     316      25                                                         303   -0.71    0.00  1.0000
  13   6  -1      37       5                                                          36    0.19    0.00  1.0000
  13   6  -1      41       6                                                          40    0.19    0.00  1.0000
  13   6  -1      34       9                                                          33    0.19    0.00  1.0000
 -13  -6   1      24       9                                                          23    0.19    0.00  1.0000
  12   6  -1     550      20                                                         517    1.37   -0.04  1.0000
  12   6  -1     579      20                                                         545    1.37   -0.04  1.0000
  12   6  -1     574      25                                                         540    1.37   -0.04  1.0000
 -12  -6   1     540      26                                                         507    1.37    0.04  1.0000
  11   6  -1     242      16                                                         369    7.00    0.04  1.0000
  11   6  -1     269      21                                                         401    7.00    0.04  1.0000
  11   6  -1     269      17                                                         401    7.00    0.04  1.0000
 -11  -6   1     236      21                                                         361    7.00   -0.04  1.0000
  10   6  -1    1129      47                                                        1381    6.85   -0.01  1.0000
  10   6  -1    1114      43                                                        1364    6.85   -0.01  1.0000
  10   6  -1    1111      43                                                        1361    6.85   -0.01  1.0000
 -10  -6   1    1136      46                                                        1389    6.85    0.01  1.0000
   9   6  -1    1003      34                                                        1071   -2.03    0.00  1.0000
   9   6  -1     970      37                                                        1037   -2.03    0.00  1.0000
   9   6  -1     951      34                                                        1017   -2.03    0.00  1.0000
   8   6  -1     685      27                                                         667    0.66   -0.02  1.0000
   8   6  -1     693      24                                                         675    0.66   -0.02  1.0000
  -8  -6   1     682      26                                                         664    0.66    0.02  1.0000
   7   6  -1      70       4                                                          10  -10.03    0.00  1.0000
  -7  -6   1     121       6                                                          34  -10.03    0.00  1.0000
   6   6  -1       3       9                                                          91   15.26   -0.01  1.0000
   6   6  -1       6      10                                                         105   15.26   -0.01  1.0000
  -6  -6   1       4      11                                                          97   15.26    0.01  1.0000
   5   6  -1     185      12                                                         159    1.93    0.02  1.0000
   5   6  -1     190      11                                                         163    1.93    0.02  1.0000
  -5  -6   1     199      12                                                         172    1.93   -0.02  1.0000
   4   6  -1     176      12                                                         203    1.89   -0.02  1.0000
   4   6  -1     168      13                                                         194    1.89   -0.02  1.0000
  -4  -6   1     183      13                                                         211    1.89    0.02  1.0000
   3   6  -1      53       5                                                          18    5.79    0.02  1.0000
   3   6  -1      46       4                                                          14    5.79    0.02  1.0000
  -3  -6   1      69       6                                                          28    5.79   -0.02  1.0000
   2   6  -1     170      13                                                         251   -5.38    0.00  1.0000
   2   6  -1     160      14                                                         239   -5.38    0.00  1.0000
  -2  -6   1     161      14                                                         240   -5.38    0.00  1.0000
   1   6  -1       1       5                                                          24    7.69   -0.02  1.0000
   1   6  -1       4       6                                                          36    7.69   -0.02  1.0000
   0   6  -1    1073      30                                                         815   -8.10   -0.02  1.0000
   0   6  -1    1078      31                                                         819   -8.10   -0.02  1.0000
   0   6  -1    1090      31                                                         830   -8.10   -0.02  1.0000
   0  -6   1    1092      30                                                         831   -8.10    0.02  1.0000
  -1   6  -1      93       9                                                          72    2.22   -0.02  1.0000
  -1   6  -1      80       9                                                          61    2.22   -0.02  1.0000
   1  -6   1      89       9                                                          69    2.22    0.02  1.0000
  -2   6  -1     732      57                                                        1722  -27.78    0.04  1.0000
  -2   6  -1     827      59                                                        1866  -27.78    0.04  1.0000
   2  -6   1     783      57                                                        1800  -27.78   -0.04  1.0000
  -3   6  -1     974      23                                                         512  -16.51    0.02  1.0000
  -3   6  -1     923      23                                                         475  -16.51    0.02  1.0000
   3  -6   1    1007      23                                                         536  -16.51   -0.02  1.0000
  -4   6  -1    1366      40                                                        1092   -7.52    0.03  1.0000
  -4   6  -1    1369      41                                                        1095   -7.52    0.03  1.0000
   4  -6   1    1398      40                                                        1121   -7.52   -0.03  1.0000
  -5   6  -1     685      28                                                         650    1.32    0.00  1.0000
  -5   6  -1     697      29                                                         661    1.32    0.00  1.0000
   5  -6   1     684      28                                                         649    1.32    0.00  1.0000
  -6   6  -1    6635     237                                                        7992  -15.28    0.01  1.0000
  -6   6  -1    6956     231                                                        8344  -15.28    0.01  1.0000
   6  -6   1    6579     229                                                        7930  -15.28   -0.01  1.0000
  -7   6  -1     487      34                                                         775   11.09    0.02  1.0000
  -7   6  -1     502      35                                                         793   11.09    0.02  1.0000
   7  -6   1     503      34                                                         795   11.09   -0.02  1.0000
   7  -6   1     484      34                                                         771   11.09   -0.02  1.0000
  -8   6  -1    2998      97                                                        2927   -1.26   -0.01  1.0000
  -8   6  -1    2987      94                                                        2916   -1.26   -0.01  1.0000
   8  -6   1    3077      96                                                        3005   -1.26    0.01  1.0000
   8  -6   1    2995      93                                                        2924   -1.26    0.01  1.0000
  -9   6  -1    1258      49                                                        1258   -0.01    0.01  1.0000
  -9   6  -1    1165      49                                                        1165   -0.01    0.01  1.0000
   9  -6   1    1241      50                                                        1241   -0.01   -0.01  1.0000
   9  -6   1    1229      47                                                        1229   -0.01   -0.01  1.0000
 -10   6  -1    1144      42                                                         927    6.49    0.01  1.0000
 -10   6  -1    1101      42                                                         889    6.49    0.01  1.0000
  10  -6   1    1061      39                                                         853    6.49   -0.01  1.0000
 -11   6  -1     100      15                                                          81   -1.96    0.02  1.0000
 -11   6  -1      80      13                                                          63   -1.96    0.02  1.0000
  11  -6   1      72      13                                                          56   -1.96   -0.02  1.0000
 -12   6  -1    1016      50                                                        1075    1.77   -0.02  1.0000
 -12   6  -1     951      48                                                        1009    1.77   -0.02  1.0000
  12  -6   1    1038      48                                                        1098    1.77    0.02  1.0000
 -13   6  -1     222      26                                                         201    1.40    0.00  1.0000
 -13   6  -1     197      23                                                         177    1.40    0.00  1.0000
  13  -6   1     149      19                                                         132    1.40    0.00  1.0000
 -14   6  -1     670      44                                                         652    0.66    0.00  1.0000
 -14   6  -1     668      42                                                         651    0.66    0.00  1.0000
  14  -6   1     643      40                                                         626    0.66    0.00  1.0000
 -15   6  -1       2      17                                                          -9   -2.41    0.01  1.0000
 -15   6  -1      14      20                                                           6   -2.41    0.01  1.0000
  15  -6   1       9      19                                                           3   -2.41   -0.01  1.0000
  15   5  -1      80      13                                                          98    1.79    0.01  1.0000
  15   5  -1      89      11                                                         107    1.79    0.01  1.0000
 -15  -5   1      65      15                                                          81    1.79   -0.01  1.0000
  14   5  -1     550      21                                                         567    0.67    0.00  1.0000
  14   5  -1     545      27                                                         561    0.67    0.00  1.0000
  14   5  -1     527      22                                                         543    0.67    0.00  1.0000
 -14  -5   1     549      30                                                         566    0.67    0.00  1.0000
  13   5  -1       0       4                                                          -1    0.22   -0.01  1.0000
  13   5  -1       3       6                                                           3    0.22   -0.01  1.0000
  13   5  -1       0       7                                                           0    0.22   -0.01  1.0000
 -13  -5   1       4       9                                                           4    0.22    0.01  1.0000
  12   5  -1     207      12                                                         204   -0.18   -0.04  1.0000
  12   5  -1     220      17                                                         217   -0.18   -0.04  1.0000
  12   5  -1     234      14                                                         231   -0.18   -0.04  1.0000
 -12  -5   1     240      19                                                         237   -0.18    0.04  1.0000
  11   5  -1     143      10                                                         120    1.96   -0.02  1.0000
  11   5  -1     160      11                                                         135    1.96   -0.02  1.0000
  11   5  -1     107      10                                                          87    1.96   -0.02  1.0000
 -11  -5   1     148      15                                                         124    1.96    0.02  1.0000
  10   5  -1   10505     264                                                        9673    7.97    0.02  1.0000
  10   5  -1   10355     273                                                        9530    7.97    0.02  1.0000
  10   5  -1   10470     264                                                        9640    7.97    0.02  1.0000
 -10  -5   1   10425     267                                                        9597    7.97   -0.02  1.0000
   9   5  -1     289      16                                                         381    4.83   -0.02  1.0000
   9   5  -1     295      16                                                         387    4.83   -0.02  1.0000
   9   5  -1     284      18                                                         375    4.83   -0.02  1.0000
  -9  -5   1     302      19                                                         396    4.83    0.02  1.0000
   8   5  -1    1067      42                                                        1239    4.87   -0.01  1.0000
   8   5  -1    1118      39                                                        1294    4.87   -0.01  1.0000
   8   5  -1    1075      40                                                        1247    4.87   -0.01  1.0000
  -8  -5   1    1118      42                                                        1293    4.87    0.01  1.0000
   7   5  -1     356      20                                                         551   -8.87   -0.13  1.0000
   7   5  -1     353      22                                                         547   -8.87   -0.13  1.0000
   6   5  -1    2503      69                                                        2274   -4.51   -0.03  1.0000
  -6  -5   1    2726      71                                                        2487   -4.51    0.03  1.0000
   5   5  -1     756      20                                                         536   -8.36   -0.07  1.0000
   5   5  -1     749      19                                                         530   -8.36   -0.07  1.0000
  -5  -5   1     758      20                                                         538   -8.36    0.07  1.0000
   4   5  -1    1858      60                                                        1988   -2.86    0.00  1.0000
   4   5  -1    1862      59                                                        1992   -2.86    0.00  1.0000
  -4  -5   1    1894      60                                                        2026   -2.86    0.00  1.0000
   3   5  -1    1367      33                                                         980   10.92   -0.10  1.0000
   3   5  -1    1355      32                                                         970   10.92   -0.10  1.0000
  -3  -5   1    1452      33                                                        1052   10.92    0.10  1.0000
  -3  -5   1    1340      32                                                         957   10.92    0.10  1.0000
   2   5  -1    9410     359                                                       13067  -33.31   -0.01  1.0000
   2   5  -1    9368     360                                                       13018  -33.31   -0.01  1.0000
  -2  -5   1    9688     360                                                       13395  -33.31    0.01  1.0000
   1   5  -1    7695     202                                                        7302   -4.37   -0.01  1.0000
   1   5  -1    7804     203                                                        7408   -4.37   -0.01  1.0000
  -1  -5   1    7595     203                                                        7204   -4.37    0.01  1.0000
   0   5  -1   30591     792                                                       29164   -7.94    0.00  1.0000
   0   5  -1   29842     815                                                       28433   -7.94    0.00  1.0000
   0   5  -1   29980     791                                                       28567   -7.94    0.00  1.0000
   0  -5   1   29771     786                                                       28363   -7.94    0.00  1.0000
  -1   5  -1     898      19                                                         476   15.71    0.05  1.0000
  -1   5  -1     832      19                                                         428   15.71    0.05  1.0000
   1  -5   1     897      19                                                         475   15.71   -0.05  1.0000
  -2   5  -1   11497     294                                                       11561   -0.57   -0.03  1.0000
  -2   5  -1   10156     301                                                       10216   -0.57   -0.03  1.0000
   2  -5   1   10005     293                                                       10064   -0.57    0.03  1.0000
  -3   5  -1       1       5                                                          21   10.55   -0.05  1.0000
  -3   5  -1       1       5                                                          22   10.55   -0.05  1.0000
   3  -5   1       1       6                                                          32   10.55    0.05  1.0000
  -4   5  -1    4608     102                                                        3493   16.90   -0.01  1.0000
  -4   5  -1    4480     105                                                        3381   16.90   -0.01  1.0000
   4  -5   1    4493     102                                                        3393   16.90    0.01  1.0000
   4  -5   1    4700     106                                                        3573   16.90    0.01  1.0000
  -5   5  -1     555      36                                                         907  -12.62   -0.08  1.0000
  -5   5  -1     593      35                                                         956  -12.62   -0.08  1.0000
   5  -5   1     571      35                                                         927  -12.62    0.08  1.0000
   5  -5   1     597      36                                                         961  -12.62    0.08  1.0000
  -6   5  -1    2831     123                                                        4027   19.73    0.07  1.0000
  -6   5  -1    2926     120                                                        4140   19.73    0.07  1.0000
   6  -5   1    2941     123                                                        4157   19.73   -0.07  1.0000
   6  -5   1    2651     119                                                        3811   19.73   -0.07  1.0000
  -7   5  -1      41       9                                                          51   -1.36   -0.04  1.0000
  -7   5  -1      75      11                                                          88   -1.36   -0.04  1.0000
   7  -5   1      62      10                                                          74   -1.36    0.04  1.0000
   7  -5   1      56      11                                                          67   -1.36    0.04  1.0000
  -8   5  -1    2718      84                                                        2427   -5.53    0.00  1.0000
  -8   5  -1    2771      81                                                        2477   -5.53    0.00  1.0000
   8  -5   1    2955      81                                                        2651   -5.53    0.00  1.0000
   8  -5   1    2845      83                                                        2547   -5.53    0.00  1.0000
  -9   5  -1       0       7                                                          -2    0.16    0.00  1.0000
  -9   5  -1       0       6                                                         -10    0.16    0.00  1.0000
   9  -5   1       0       7                                                          -7    0.16    0.00  1.0000
   9  -5   1       0       6                                                          -5    0.16    0.00  1.0000
 -10   5  -1    8041     229                                                        8024    0.19    0.00  1.0000
 -10   5  -1    8008     236                                                        7991    0.19    0.00  1.0000
  10  -5   1    7752     234                                                        7735    0.19    0.00  1.0000
  10  -5   1    7917     227                                                        7900    0.19    0.00  1.0000
 -11   5  -1       3       9                                                           2   -0.83    0.02  1.0000
 -11   5  -1      40      12                                                          35   -0.83    0.02  1.0000
  11  -5   1       8       9                                                           6   -0.83   -0.02  1.0000
 -12   5  -1      74      15                                                          92   -1.90    0.00  1.0000
 -12   5  -1      74      15                                                          92   -1.90    0.00  1.0000
  12  -5   1      82      16                                                         101   -1.90    0.00  1.0000
 -13   5  -1     265      30                                                         341    4.21    0.01  1.0000
 -13   5  -1     266      28                                                         342    4.21    0.01  1.0000
  13  -5   1     256      29                                                         331    4.21   -0.01  1.0000
  13  -5   1     186      27                                                         250    4.21   -0.01  1.0000
 -14   5  -1     903      45                                                         855   -1.56   -0.01  1.0000
 -14   5  -1     888      46                                                         840   -1.56   -0.01  1.0000
  14  -5   1     884      43                                                         837   -1.56    0.01  1.0000
  14  -5   1     841      44                                                         795   -1.56    0.01  1.0000
 -15   5  -1     188      24                                                         157    2.29    0.02  1.0000
 -15   5  -1     140      21                                                         113    2.29    0.02  1.0000
  15  -5   1     173      22                                                         143    2.29   -0.02  1.0000
 -16   5  -1    1249      65                                                        1271   -0.59    0.00  1.0000
 -16   5  -1    1053      58                                                        1073   -0.59    0.00  1.0000
  16   4  -1       7       7                                                           7   -0.10    0.01  1.0000
 -16  -4   1       1      13                                                           1   -0.10   -0.01  1.0000
  15   4  -1     352      24                                                         356   -0.20    0.02  1.0000
  15   4  -1     323      17                                                         327   -0.20    0.02  1.0000
 -15  -4   1     333      27                                                         337   -0.20   -0.02  1.0000
  14   4  -1     280      15                                                         284   -0.26    0.01  1.0000
  14   4  -1     276      21                                                         280   -0.26    0.01  1.0000
 -14  -4   1     267      23                                                         271   -0.26   -0.01  1.0000
  13   4  -1     891      32                                                         974    2.62    0.01  1.0000
  13   4  -1     869      36                                                         951    2.62    0.01  1.0000
 -13  -4   1     904      39                                                         988    2.62   -0.01  1.0000
  12   4  -1       5       6                                                           3    0.79   -0.04  1.0000
  12   4  -1       2       5                                                           1    0.79   -0.04  1.0000
 -12  -4   1       0       7                                                          -5    0.79    0.04  1.0000
  11   4  -1     134      10                                                         116    1.58    0.01  1.0000
  11   4  -1     157      13                                                         137    1.58    0.01  1.0000
 -11  -4   1     143      14                                                         124    1.58   -0.01  1.0000
  10   4  -1     364      14                                                         285    4.21   -0.05  1.0000
  10   4  -1     364      16                                                         285    4.21   -0.05  1.0000
 -10  -4   1     270      16                                                         203    4.21    0.05  1.0000
   9   4  -1    2601      83                                                        2770    3.15    0.02  1.0000
   9   4  -1    2750      87                                                        2924    3.15    0.02  1.0000
  -9  -4   1    2796      86                                                        2972    3.15   -0.02  1.0000
   8   4  -1     392      28                                                         857   18.23    0.02  1.0000
   8   4  -1     392      30                                                         857   18.23    0.02  1.0000
  -8  -4   1     379      30                                                         837   18.23   -0.02  1.0000
   7   4  -1    1691      47                                                        1572    2.84   -0.01  1.0000
   7   4  -1    1705      49                                                        1585    2.84   -0.01  1.0000
  -7  -4   1    1670      48                                                        1551    2.84    0.01  1.0000
   6   4  -1    2765      74                                                        2627   -2.55   -0.07  1.0000
   6   4  -1    2730      77                                                        2593   -2.55   -0.07  1.0000
  -6  -4   1    2658      75                                                        2523   -2.55    0.07  1.0000
   5   4  -1    2129      37                                                        1201  -22.11   -0.06  1.0000
  -5  -4   1    2175      38                                                        1235  -22.11    0.06  1.0000
   4   4  -1     447      17                                                         538   -3.97   -0.07  1.0000
   4   4  -1     357      17                                                         439   -3.97   -0.07  1.0000
  -4  -4   1     369      17                                                         453   -3.97    0.07  1.0000
   3   4  -1     250       5                                                          49   16.97    0.00  1.0000
   3   4  -1     225       5                                                          38   16.97    0.00  1.0000
  -3  -4   1     253       5                                                          50   16.97    0.00  1.0000
   2   4  -1      51       5                                                          30    3.15   -0.01  1.0000
  -2  -4   1      43       4                                                          24    3.15    0.01  1.0000
   1   4  -1      42      12                                                         304   21.10    0.03  1.0000
   1   4  -1      36      13                                                         289   21.10    0.03  1.0000
  -1  -4   1      40      13                                                         300   21.10   -0.03  1.0000
   0   4  -1     378      15                                                         359    0.96    0.00  1.0000
   0   4  -1     386      15                                                         367    0.96    0.00  1.0000
   0  -4   1     377      15                                                         358    0.96    0.00  1.0000
  -1   4  -1      41       7                                                          76  -29.04   -0.03  1.0000
  -1   4  -1      33       7                                                          88  -29.04   -0.03  1.0000
   1  -4   1      37       7                                                          81  -29.04    0.03  1.0000
  -2   4  -1      70       3                                                           5  -11.86    0.02  1.0000
  -2   4  -1      89       4                                                          11  -11.86    0.02  1.0000
  -3   4  -1    9929     262                                                        9457    4.61    0.06  1.0000
  -3   4  -1    9381     254                                                        8923    4.61    0.06  1.0000
   3  -4   1   10107     262                                                        9631    4.61   -0.06  1.0000
   3  -4   1    9220     254                                                        8766    4.61   -0.06  1.0000
  -4   4  -1    2864     176                                                        6134  -47.72    0.00  1.0000
   4  -4   1    2930     180                                                        6230  -47.72    0.00  1.0000
   4  -4   1    2983     175                                                        6307  -47.72    0.00  1.0000
  -5   4  -1    3360     102                                                        3555    3.19   -0.01  1.0000
  -5   4  -1    3162     104                                                        3351    3.19   -0.01  1.0000
   5  -4   1    3093     103                                                        3280    3.19    0.01  1.0000
   5  -4   1    3280     101                                                        3473    3.19    0.01  1.0000
  -6   4  -1      11       5                                                          -8   -6.35    0.01  1.0000
  -6   4  -1      11       4                                                          -8   -6.35    0.01  1.0000
   6  -4   1      33       6                                                           7   -6.35   -0.01  1.0000
   6  -4   1      11       5                                                          -6   -6.35   -0.01  1.0000
  -7   4  -1     150      12                                                         120    2.50    0.01  1.0000
  -7   4  -1     153      13                                                         123    2.50    0.01  1.0000
   7  -4   1     151      12                                                         121    2.50   -0.01  1.0000
   7  -4   1     126      12                                                          99    2.50   -0.01  1.0000
  -8   4  -1     980      36                                                         863    3.71    0.04  1.0000
  -8   4  -1     968      35                                                         852    3.71    0.04  1.0000
   8  -4   1     968      35                                                         852    3.71   -0.04  1.0000
   8  -4   1     951      33                                                         836    3.71   -0.04  1.0000
  -9   4  -1    2542      87                                                        2838    5.49    0.01  1.0000
  -9   4  -1    2418      89                                                        2707    5.49    0.01  1.0000
   9  -4   1    2443      85                                                        2733    5.49   -0.01  1.0000
   9  -4   1    2371      88                                                        2657    5.49   -0.01  1.0000
 -10   4  -1     196      20                                                         208    0.81    0.01  1.0000
 -10   4  -1     192      20                                                         204    0.81    0.01  1.0000
  10  -4   1     179      18                                                         190    0.81   -0.01  1.0000
  10  -4   1     192      21                                                         204    0.81   -0.01  1.0000
 -11   4  -1      68      13                                                          88   -2.19   -0.02  1.0000
 -11   4  -1      80      14                                                         102   -2.19   -0.02  1.0000
  11  -4   1      85      13                                                         107   -2.19    0.02  1.0000
  11  -4   1     104      17                                                         129   -2.19    0.02  1.0000
 -12   4  -1      22      10                                                           8    3.75    0.03  1.0000
 -12   4  -1       4       9                                                          -3    3.75    0.03  1.0000
  12  -4   1       4       9                                                          -1    3.75   -0.03  1.0000
 -13   4  -1     986      42                                                         862   -3.93    0.01  1.0000
 -13   4  -1     984      42                                                         860   -3.93    0.01  1.0000
  13  -4   1     992      40                                                         868   -3.93   -0.01  1.0000
 -14   4  -1     232      30                                                         237    0.34    0.02  1.0000
 -14   4  -1     175      24                                                         180    0.34    0.02  1.0000
  14  -4   1     214      27                                                         219    0.34   -0.02  1.0000
  14  -4   1     259      27                                                         265    0.34   -0.02  1.0000
 -15   4  -1     753      46                                                         718    1.25   -0.01  1.0000
 -15   4  -1     736      42                                                         701    1.25   -0.01  1.0000
  15  -4   1     752      41                                                         717    1.25    0.01  1.0000
  15  -4   1     739      42                                                         704    1.25    0.01  1.0000
 -16   4  -1      48      17                                                          45    0.43    0.00  1.0000
 -16   4  -1       0      19                                                          -5    0.43    0.00  1.0000
  16  -4   1      51      19                                                          48    0.43    0.00  1.0000
  17   3  -1       0      13                                                         -15   -0.47    0.01  1.0000
  16   3  -1    1071      38                                                        1088   -0.50    0.02  1.0000
 -16  -3   1    1058      48                                                        1075   -0.50   -0.02  1.0000
  15   3  -1      31       8                                                          23   -1.43    0.01  1.0000
  15   3  -1      20      11                                                          14   -1.43    0.01  1.0000
 -15  -3   1      42      12                                                          33   -1.43   -0.01  1.0000
  14   3  -1    1426      52                                                        1417   -0.23    0.03  1.0000
  14   3  -1    1810      58                                                        1800   -0.23    0.03  1.0000
 -14  -3   1    1805      60                                                        1795   -0.23   -0.03  1.0000
  13   3  -1      54       7                                                          35    2.69    0.02  1.0000
  13   3  -1      58       9                                                          39    2.69    0.02  1.0000
 -13  -3   1      61      10                                                          41    2.69   -0.02  1.0000
  12   3  -1      36       8                                                          58    3.12    0.02  1.0000
 -12  -3   1      31      10                                                          52    3.12   -0.02  1.0000
  11   3  -1      53      11                                                          88    4.08    0.02  1.0000
 -11  -3   1      27       8                                                          53    4.08   -0.02  1.0000
  10   3  -1    2495      73                                                        2394    1.96    0.05  1.0000
 -10  -3   1    2458      73                                                        2358    1.96   -0.05  1.0000
   9   3  -1      91      11                                                         156   -5.67   -0.07  1.0000
  -9  -3   1      55      11                                                         107   -5.67    0.07  1.0000
   8   3  -1    2477      97                                                        3300   14.76    0.00  1.0000
  -8  -3   1    2450      95                                                        3269   14.76    0.00  1.0000
   7   3  -1    3443     103                                                        3693    4.03   -0.06  1.0000
  -7  -3   1    3091     100                                                        3328    4.03    0.06  1.0000
   6   3  -1   17133     526                                                       19059   13.78   -0.01  1.0000
  -6  -3   1   16555     514                                                       18449   13.78    0.01  1.0000
   5   3  -1    1318      46                                                        1507   -4.85   -0.10  1.0000
  -5  -3   1    1312      45                                                        1501   -4.85    0.10  1.0000
   4   3  -1   25324     938                                                       34487  -51.13    0.01  1.0000
  -4  -3   1   25114     940                                                       34242  -51.13   -0.01  1.0000
   3   3  -1      95       4                                                          31  -28.94   -0.14  1.0000
  -3  -3   1      81       4                                                          41  -28.94    0.14  1.0000
   2   3  -1       1      46                                                        1498  -76.09    0.05  1.0000
   2   3  -1       0      46                                                        1560  -76.09    0.05  1.0000
  -2  -3   1       1      46                                                        1501  -76.09   -0.05  1.0000
  -2  -3   1       5      47                                                        1743  -76.09   -0.05  1.0000
   1   3  -1    1899      12                                                         325   49.17    0.10  1.0000
  -1  -3   1    1883      12                                                         319   49.17   -0.10  1.0000
   0   3  -1   13758     238                                                        8649  -46.76    0.05  1.0000
   0   3  -1   13962     245                                                        8811  -46.76    0.05  1.0000
   0  -3   1   13761     243                                                        8651  -46.76   -0.05  1.0000
  -1   3  -1     676      31                                                         996   10.69    0.10  1.0000
  -1   3  -1     664      32                                                         981   10.69    0.10  1.0000
   1  -3   1     671      31                                                         989   10.69   -0.10  1.0000
  -2   3  -1     518       2                                                         -10   43.80   -0.05  1.0000
  -2   3  -1     518       2                                                          -8   43.80   -0.05  1.0000
   2  -3   1     518       2                                                          -9   43.80    0.05  1.0000
  -3   3  -1     883      42                                                        1303  -12.27   -0.13  1.0000
  -3   3  -1     857      40                                                        1271  -12.27   -0.13  1.0000
   3  -3   1     861      41                                                        1276  -12.27    0.13  1.0000
   3  -3   1     805      40                                                        1207  -12.27    0.13  1.0000
  -4   3  -1   10469     189                                                        6876   37.34    0.02  1.0000
  -4   3  -1    9841     184                                                        6369   37.34    0.02  1.0000
   4  -3   1   10385     189                                                        6808   37.34   -0.02  1.0000
   4  -3   1    9698     183                                                        6254   37.34   -0.02  1.0000
  -5   3  -1    1806      65                                                        2187    8.20   -0.01  1.0000
  -5   3  -1    1761      66                                                        2137    8.20   -0.01  1.0000
   5  -3   1    1595      65                                                        1954    8.20    0.01  1.0000
   5  -3   1    1727      64                                                        2100    8.20    0.01  1.0000
  -6   3  -1   20042     597                                                       20709    4.50    0.02  1.0000
  -6   3  -1   21340     581                                                       22028    4.50    0.02  1.0000
   6  -3   1   20599     600                                                       21275    4.50   -0.02  1.0000
   6  -3   1   20379     580                                                       21051    4.50   -0.02  1.0000
  -7   3  -1     211      21                                                         425  -11.69   -0.06  1.0000
  -7   3  -1     219      21                                                         436  -11.69   -0.06  1.0000
   7  -3   1     200      20                                                         408  -11.69    0.06  1.0000
   7  -3   1     231      21                                                         452  -11.69    0.06  1.0000
  -8   3  -1    1667      70                                                        2129   10.23   -0.04  1.0000
  -8   3  -1    1689      68                                                        2154   10.23   -0.04  1.0000
   8  -3   1    1658      66                                                        2119   10.23    0.04  1.0000
   8  -3   1    1562      68                                                        2010   10.23    0.04  1.0000
  -9   3  -1       3       6                                                          -2   -3.08    0.05  1.0000
  -9   3  -1       3       6                                                          -2   -3.08    0.05  1.0000
   9  -3   1       7       6                                                           2   -3.08   -0.05  1.0000
   9  -3   1       3       5                                                          -3   -3.08   -0.05  1.0000
 -10   3  -1    3330     109                                                        3385   -0.91   -0.08  1.0000
 -10   3  -1    3358     107                                                        3413   -0.91   -0.08  1.0000
  10  -3   1    3591     108                                                        3648   -0.91    0.08  1.0000
  10  -3   1    3273     104                                                        3327   -0.91    0.08  1.0000
 -11   3  -1      14       8                                                           4    3.29   -0.04  1.0000
 -11   3  -1       3       8                                                          -7    3.29   -0.04  1.0000
  11  -3   1       3       7                                                          -5    3.29    0.04  1.0000
  11  -3   1       3       7                                                          -7    3.29    0.04  1.0000
 -12   3  -1      57      10                                                          38   -2.64    0.00  1.0000
 -12   3  -1      81      12                                                          58   -2.64    0.00  1.0000
  12  -3   1      74      11                                                          52   -2.64    0.00  1.0000
  12  -3   1      80      11                                                          57   -2.64    0.00  1.0000
 -13   3  -1       1      11                                                          -6    2.23    0.01  1.0000
  13  -3   1       1       9                                                          -6    2.23   -0.01  1.0000
 -14   3  -1    1247      52                                                        1160   -2.41    0.02  1.0000
 -14   3  -1    1122      50                                                        1040   -2.41    0.02  1.0000
  14  -3   1    1182      48                                                        1098   -2.41   -0.02  1.0000
  14  -3   1    1215      47                                                        1129   -2.41   -0.02  1.0000
 -15   3  -1       0      12                                                         -28   -0.01    0.02  1.0000
 -15   3  -1       5      15                                                           5   -0.01    0.02  1.0000
  15  -3   1       0      12                                                         -15   -0.01   -0.02  1.0000
 -16   3  -1     652      44                                                         648    0.16    0.00  1.0000
 -16   3  -1     561      40                                                         557    0.16    0.00  1.0000
  16  -3   1     543      38                                                         539    0.16    0.00  1.0000
  17   2  -1      25      15                                                          21    0.72    0.01  1.0000
  16   2  -1       0      12                                                          -3   -0.63   -0.01  1.0000
 -16  -2   1       0      13                                                          -5   -0.63    0.01  1.0000
 -15  -2   1     107      15                                                          85   -2.18    0.01  1.0000
  14   2  -1     177      19                                                         183    0.43    0.00  1.0000
 -14  -2   1     147      22                                                         153    0.43    0.00  1.0000
  13   2  -1     162      16                                                         177   -1.08   -0.01  1.0000
 -13  -2   1     133      18                                                         146   -1.08    0.01  1.0000
  12   2  -1       4       5                                                          -3    3.92   -0.03  1.0000
  12   2  -1       4       5                                                          -3    3.92   -0.03  1.0000
 -12  -2   1       1       7                                                           7    3.92    0.03  1.0000
  11   2  -1     805      37                                                        1030    7.16   -0.04  1.0000
  11   2  -1     770      34                                                         990    7.16   -0.04  1.0000
 -11  -2   1     802      38                                                        1027    7.16    0.04  1.0000
  10   2  -1     143      12                                                         210    4.89   -0.02  1.0000
  10   2  -1     167      15                                                         239    4.89   -0.02  1.0000
 -10  -2   1     150      15                                                         219    4.89    0.02  1.0000
   9   2  -1      33       4                                                           8    5.63   -0.01  1.0000
  -9  -2   1      49       5                                                          17    5.63    0.01  1.0000
   8   2  -1      30       7                                                          44   -2.29    0.07  1.0000
  -8  -2   1      28       6                                                          42   -2.29   -0.07  1.0000
   7   2  -1     198       7                                                          61  -12.06   -0.04  1.0000
  -7  -2   1     210       7                                                          68  -12.06    0.04  1.0000
   6   2  -1    2853      67                                                        2300   10.49   -0.04  1.0000
  -6  -2   1    2793      66                                                        2246   10.49    0.04  1.0000
   5   2  -1    6947     164                                                        5857   13.12    0.07  1.0000
  -5  -2   1    6858     160                                                        5775   13.12   -0.07  1.0000
  -4  -2   1     108       5                                                          85    2.23    0.06  1.0000
   3   2  -1      12      11                                                         319  -27.76   -0.05  1.0000
  -3  -2   1      11      11                                                         315  -27.76    0.05  1.0000
   2   2  -1     103       3                                                          45   -6.58    0.03  1.0000
  -2  -2   1     104       3                                                          46   -6.58   -0.03  1.0000
  -2  -2   1     100       3                                                          43   -6.58   -0.03  1.0000
   1   2  -1     376       5                                                          95  -18.57   -0.08  1.0000
   1   2  -1     350       5                                                          82  -18.57   -0.08  1.0000
  -1  -2   1     415       5                                                         115  -18.57    0.08  1.0000
   0   2  -1       2       1                                                         -16   -2.56    0.03  1.0000
   0   2  -1       2       1                                                         -12   -2.56    0.03  1.0000
   0  -2   1       2       1                                                         -16   -2.56   -0.03  1.0000
  -1   2  -1    2620      24                                                         791   44.37    0.08  1.0000
  -1   2  -1    2551      24                                                         753   44.37    0.08  1.0000
   1  -2   1    2506      24                                                         729   44.37   -0.08  1.0000
   1  -2   1    2486      23                                                         718   44.37   -0.08  1.0000
  -2   2  -1    7992     175                                                        6192  -20.60    0.12  1.0000
  -2   2  -1    8327     180                                                        6488  -20.60    0.12  1.0000
   2  -2   1    8130     180                                                        6314  -20.60   -0.12  1.0000
  -3   2  -1    2212     103                                                        3507  -23.46   -0.05  1.0000
  -3   2  -1    2329     100                                                        3654  -23.46   -0.05  1.0000
   3  -2   1    2070     102                                                        3328  -23.46    0.05  1.0000
   3  -2   1    2285     100                                                        3599  -23.46    0.05  1.0000
  -4   2  -1    1476      41                                                        1332   -3.70   -0.09  1.0000
  -4   2  -1    1439      42                                                        1297   -3.70   -0.09  1.0000
   4  -2   1    1417      42                                                        1276   -3.70    0.09  1.0000
   4  -2   1    1426      40                                                        1284   -3.70    0.09  1.0000
  -5   2  -1     883      23                                                         586   10.61   -0.06  1.0000
  -5   2  -1     932      23                                                         626   10.61   -0.06  1.0000
   5  -2   1     908      23                                                         606   10.61    0.06  1.0000
   5  -2   1     899      22                                                         599   10.61    0.06  1.0000
  -6   2  -1      45       4                                                           5  -17.23    0.02  1.0000
  -6   2  -1      63       4                                                           1  -17.23    0.02  1.0000
   6  -2   1      57       4                                                           2  -17.23   -0.02  1.0000
   6  -2   1      52       5                                                           3  -17.23   -0.02  1.0000
  -7   2  -1    1173      57                                                        1794   15.61   -0.05  1.0000
  -7   2  -1    1129      58                                                        1740   15.61   -0.05  1.0000
   7  -2   1    1101      55                                                        1705   15.61    0.05  1.0000
   7  -2   1    1213      58                                                        1844   15.61    0.05  1.0000
  -8   2  -1     664      24                                                         528   -5.38    0.02  1.0000
  -8   2  -1     697      24                                                         557   -5.38    0.02  1.0000
   8  -2   1     634      22                                                         501   -5.38   -0.02  1.0000
   8  -2   1     641      23                                                         507   -5.38   -0.02  1.0000
  -9   2  -1     574      27                                                         639   -2.53   -0.03  1.0000
  -9   2  -1     582      28                                                         647   -2.53   -0.03  1.0000
   9  -2   1     536      26                                                         598   -2.53    0.03  1.0000
   9  -2   1     551      27                                                         614   -2.53    0.03  1.0000
 -10   2  -1     155      12                                                          94    5.33    0.00  1.0000
 -10   2  -1     163      14                                                         100    5.33    0.00  1.0000
  10  -2   1     180      15                                                         113    5.33    0.00  1.0000
  10  -2   1     154      13                                                          93    5.33    0.00  1.0000
 -11   2  -1    1689      56                                                        1546   -3.44    0.01  1.0000
 -11   2  -1    1701      57                                                        1557   -3.44    0.01  1.0000
  11  -2   1    1729      56                                                        1584   -3.44   -0.01  1.0000
  11  -2   1    1692      53                                                        1548   -3.44   -0.01  1.0000
 -12   2  -1      13       9                                                           4    2.99    0.02  1.0000
 -12   2  -1       7       8                                                           1    2.99    0.02  1.0000
  12  -2   1       2       7                                                           0    2.99   -0.02  1.0000
  12  -2   1      13       7                                                           4    2.99   -0.02  1.0000
 -13   2  -1     174      22                                                         202   -1.98    0.02  1.0000
 -13   2  -1     184      21                                                         213   -1.98    0.02  1.0000
  13  -2   1     165      19                                                         192   -1.98   -0.02  1.0000
 -14   2  -1       1      11                                                         -15    1.56    0.01  1.0000
 -14   2  -1       1      12                                                         -21    1.56    0.01  1.0000
  14  -2   1       1       9                                                         -19    1.56   -0.01  1.0000
  14  -2   1       1       9                                                         -22    1.56   -0.01  1.0000
 -15   2  -1      16      14                                                          15   -0.30    0.00  1.0000
 -15   2  -1      47      17                                                          45   -0.30    0.00  1.0000
  15  -2   1      31      14                                                          29   -0.30    0.00  1.0000
  15  -2   1      49      14                                                          47   -0.30    0.00  1.0000
 -16   2  -1       0      14                                                         -28   -0.71   -0.01  1.0000
 -16   2  -1       0      18                                                         -28   -0.71   -0.01  1.0000
  16  -2   1       0      13                                                         -29   -0.71    0.01  1.0000
 -17   2  -1     100      21                                                         100   -0.01    0.03  1.0000
  17   1  -1      10      15                                                          10   -0.12   -0.02  1.0000
  16   1  -1    1033      42                                                        1095   -1.82    0.00  1.0000
  16   1  -1    1072      47                                                        1135   -1.82    0.00  1.0000
 -16  -1   1    1009      50                                                        1070   -1.82    0.00  1.0000
  15   1  -1       0       8                                                          -5    0.90    0.02  1.0000
 -15  -1   1       6      11                                                           9    0.90   -0.02  1.0000
 -15  -1   1       0      11                                                         -15    0.90   -0.02  1.0000
  14   1  -1    1428      49                                                        1377   -1.31    0.00  1.0000
  14   1  -1    1294      44                                                        1245   -1.31    0.00  1.0000
 -14  -1   1    1310      49                                                        1261   -1.31    0.00  1.0000
 -14  -1   1    1279      49                                                        1231   -1.31    0.00  1.0000
  13   1  -1      13       7                                                          22    2.09    0.01  1.0000
  13   1  -1      23       9                                                          35    2.09    0.01  1.0000
 -13  -1   1      11       9                                                          20    2.09   -0.01  1.0000
 -13  -1   1      21       9                                                          32    2.09   -0.01  1.0000
  12   1  -1     290      19                                                         325    1.93    0.04  1.0000
  12   1  -1     247      17                                                         280    1.93    0.04  1.0000
 -12  -1   1     272      20                                                         306    1.93   -0.04  1.0000
 -12  -1   1     275      21                                                         309    1.93   -0.04  1.0000
  11   1  -1     177      13                                                         181   -0.29    0.00  1.0000
  11   1  -1     171      14                                                         175   -0.29    0.00  1.0000
 -11  -1   1     175      15                                                         179   -0.29    0.00  1.0000
 -11  -1   1     186      15                                                         190   -0.29    0.00  1.0000
  10   1  -1    8267     203                                                        7020   13.74    0.01  1.0000
  10   1  -1    8567     210                                                        7297   13.74    0.01  1.0000
 -10  -1   1    8663     212                                                        7385   13.74   -0.01  1.0000
 -10  -1   1    8886     207                                                        7591   13.74   -0.01  1.0000
   9   1  -1     805      33                                                         956    4.89    0.04  1.0000
   9   1  -1     715      30                                                         857    4.89    0.04  1.0000
  -9  -1   1     803      34                                                         954    4.89   -0.04  1.0000
  -9  -1   1     779      33                                                         927    4.89   -0.04  1.0000
   8   1  -1     385      28                                                         803   16.78    0.04  1.0000
   8   1  -1     448      30                                                         892   16.78    0.04  1.0000
  -8  -1   1     443      31                                                         885   16.78   -0.04  1.0000
  -8  -1   1     432      30                                                         870   16.78   -0.04  1.0000
   7   1  -1    4326     150                                                        5213  -12.37   -0.10  1.0000
   7   1  -1    4241     146                                                        5120  -12.37   -0.10  1.0000
  -7  -1   1    4411     151                                                        5306  -12.37    0.10  1.0000
  -7  -1   1    4421     147                                                        5317  -12.37    0.10  1.0000
   6   1  -1    3526     102                                                        3344   -2.99    0.06  1.0000
   6   1  -1    4115     106                                                        3918   -2.99    0.06  1.0000
  -6  -1   1    4153     107                                                        3955   -2.99   -0.06  1.0000
  -6  -1   1    3679     103                                                        3493   -2.99   -0.06  1.0000
   5   1  -1    4464     124                                                        4303   -2.34    0.01  1.0000
  -5  -1   1    4623     124                                                        4459   -2.34   -0.01  1.0000
  -5  -1   1    4401     121                                                        4241   -2.34   -0.01  1.0000
   4   1  -1   21920     891                                                       31068  -54.27    0.00  1.0000
  -4  -1   1   23198     893                                                       32586  -54.27    0.00  1.0000
  -4  -1   1   22494     869                                                       31751  -54.27    0.00  1.0000
   3   1  -1   34786     775                                                       27100   42.11    0.08  1.0000
  -3  -1   1   36367     776                                                       28497   42.11   -0.08  1.0000
  -3  -1   1   35335     756                                                       27585   42.11   -0.08  1.0000
  -2  -1   1    3657       4                                                          43 -123.84    0.03  1.0000
   1   1  -1   18309     305                                                       11010  -58.45   -0.04  1.0000
  -1  -1   1   18691     306                                                       11307  -58.45    0.04  1.0000
  -1   1  -1   10975     255                                                        9274   16.28   -0.03  1.0000
  -1   1  -1   10657     248                                                        8982   16.28   -0.03  1.0000
   1  -1   1    9682     253                                                        8088   16.28    0.03  1.0000
  -2   1  -1    1376      15                                                         413   32.31    0.14  1.0000
   2  -1   1    1397      15                                                         425   32.31   -0.14  1.0000
   2  -1   1    1383      15                                                         417   32.31   -0.14  1.0000
  -3   1  -1   13076     467                                                       17157   32.01   -0.01  1.0000
  -3   1  -1   12409     448                                                       16392   32.01   -0.01  1.0000
   3  -1   1   12769     452                                                       16805   32.01    0.01  1.0000
   3  -1   1   10808     454                                                       14544   32.01    0.01  1.0000
  -4   1  -1   20693     353                                                       12931   57.99    0.03  1.0000
  -4   1  -1   20505     360                                                       12782   57.99    0.03  1.0000
   4  -1   1   20269     362                                                       12596   57.99   -0.03  1.0000
   4  -1   1   19702     348                                                       12150   57.99   -0.03  1.0000
  -5   1  -1       5       9                                                         124  -17.54   -0.02  1.0000
  -5   1  -1       7       9                                                         136  -17.54   -0.02  1.0000
   5  -1   1      15       9                                                         165  -17.54    0.02  1.0000
   5  -1   1       3       9                                                         110  -17.54    0.02  1.0000
  -6   1  -1    6956     285                                                       10067   32.59   -0.04  1.0000
  -6   1  -1    7124     278                                                       10269   32.59   -0.04  1.0000
   6  -1   1    6687     277                                                        9744   32.59    0.04  1.0000
   6  -1   1    7030     285                                                       10157   32.59    0.04  1.0000
  -7   1  -1    1157      39                                                        1156   -0.02    0.03  1.0000
  -7   1  -1    1131      38                                                        1130   -0.02    0.03  1.0000
   7  -1   1    1031      36                                                        1030   -0.02   -0.03  1.0000
   7  -1   1    1101      38                                                        1100   -0.02   -0.03  1.0000
  -8   1  -1     487      24                                                         547    2.55   -0.05  1.0000
  -8   1  -1     491      24                                                         551    2.55   -0.05  1.0000
   8  -1   1     472      22                                                         531    2.55    0.05  1.0000
   8  -1   1     486      24                                                         546    2.55    0.05  1.0000
  -9   1  -1    1122      44                                                        1215   -2.62   -0.01  1.0000
  -9   1  -1    1132      43                                                        1225   -2.62   -0.01  1.0000
   9  -1   1    1111      41                                                        1204   -2.62    0.01  1.0000
   9  -1   1    1162      44                                                        1257   -2.62    0.01  1.0000
 -10   1  -1    6695     203                                                        6963   -3.12   -0.10  1.0000
 -10   1  -1    7000     199                                                        7274   -3.12   -0.10  1.0000
  10  -1   1    6567     195                                                        6832   -3.12    0.10  1.0000
  10  -1   1    6306     201                                                        6566   -3.12    0.10  1.0000
 -11   1  -1       1       6                                                           3    1.29    0.01  1.0000
 -11   1  -1       1       6                                                           2    1.29    0.01  1.0000
  11  -1   1       0       6                                                           0    1.29   -0.01  1.0000
  11  -1   1       0       6                                                           0    1.29   -0.01  1.0000
 -12   1  -1      22       9                                                          13   -2.17    0.01  1.0000
 -12   1  -1      24       8                                                          14   -2.17    0.01  1.0000
  12  -1   1      43       9                                                          30   -2.17   -0.01  1.0000
  12  -1   1      40       8                                                          27   -2.17   -0.01  1.0000
 -13   1  -1     106      13                                                          80    2.60   -0.01  1.0000
 -13   1  -1     121      14                                                          93    2.60   -0.01  1.0000
  13  -1   1      92      11                                                          68    2.60    0.01  1.0000
  13  -1   1      84      11                                                          61    2.60    0.01  1.0000
 -14   1  -1    1979      72                                                        1976   -0.08    0.03  1.0000
 -14   1  -1    1969      72                                                        1966   -0.08    0.03  1.0000
  14  -1   1    1882      65                                                        1879   -0.08   -0.03  1.0000
 -15   1  -1     162      19                                                         150    0.96    0.02  1.0000
 -15   1  -1     161      20                                                         149    0.96    0.02  1.0000
  15  -1   1     161      18                                                         149    0.96   -0.02  1.0000
  15  -1   1     132      16                                                         121    0.96   -0.02  1.0000
 -16   1  -1    1262      57                                                        1227    0.95    0.00  1.0000
 -16   1  -1    1142      54                                                        1109    0.95    0.00  1.0000
  16  -1   1    1142      52                                                        1109    0.95    0.00  1.0000
  16  -1   1    1235      49                                                        1201    0.95    0.00  1.0000
 -17   1  -1      76      22                                                          68   -0.95    0.00  1.0000
 -17   1  -1      49      18                                                          42   -0.95    0.00  1.0000
  17   0  -1     149      19                                                         135   -1.14   -0.01  1.0000
 -17   0   1     202      28                                                         186   -1.14    0.01  1.0000
 -17   0   1     175      22                                                         160   -1.14    0.01  1.0000
  15   0  -1     690      35                                                         800   -3.89   -0.01  1.0000
 -15   0   1     708      40                                                         820   -3.89    0.01  1.0000
 -15   0   1     717      40                                                         829   -3.89    0.01  1.0000
  13   0  -1     430      23                                                         441    0.50    0.00  1.0000
  13   0  -1     455      25                                                         466    0.50    0.00  1.0000
 -13   0   1     454      25                                                         465    0.50    0.00  1.0000
 -13   0   1     466      27                                                         477    0.50    0.00  1.0000
  11   0  -1    1432      41                                                        1191    6.42   -0.01  1.0000
  11   0  -1    1500      44                                                        1253    6.42   -0.01  1.0000
 -11   0   1    1472      44                                                        1227    6.42    0.01  1.0000
 -11   0   1    1506      45                                                        1258    6.42    0.01  1.0000
   9   0  -1    4150     140                                                        4819    9.62    0.01  1.0000
   9   0  -1    3967     135                                                        4621    9.62    0.01  1.0000
  -9   0   1    4119     137                                                        4785    9.62   -0.01  1.0000
  -9   0   1    4217     141                                                        4891    9.62   -0.01  1.0000
   7   0  -1    4456     122                                                        4193    3.85   -0.02  1.0000
   7   0  -1    4540     126                                                        4274    3.85   -0.02  1.0000
  -7   0   1    4634     126                                                        4365    3.85    0.02  1.0000
  -7   0   1    4756     123                                                        4484    3.85    0.02  1.0000
   5   0  -1    4583      59                                                        1947  -45.36   -0.06  1.0000
   5   0  -1    4490      57                                                        1886  -45.36   -0.06  1.0000
  -5   0   1    4681      59                                                        2011  -45.36    0.06  1.0000
  -5   0   1    4706      58                                                        2027  -45.36    0.06  1.0000
   3   0  -1     905      11                                                         302   24.43    0.05  1.0000
  -3   0   1     906      11                                                         303   24.43   -0.05  1.0000
  -3   0   1     927      11                                                         315   24.43   -0.05  1.0000
  -3   0  -1   15074     324                                                       11817   27.07   -0.02  1.0000
  -3   0  -1   14856     318                                                       11624   27.07   -0.02  1.0000
   3   0   1   13689     311                                                       10595   27.07    0.02  1.0000
   3   0   1   14368     317                                                       11193   27.07    0.02  1.0000
  -5   0  -1   11857     392                                                       14384   21.25   -0.06  1.0000
  -5   0  -1   11571     385                                                       14069   21.25   -0.06  1.0000
   5   0   1   11353     391                                                       13829   21.25    0.06  1.0000
   5   0   1   11166     386                                                       13622   21.25    0.06  1.0000
  -7   0  -1    6510     161                                                        5693   10.07    0.03  1.0000
  -7   0  -1    6602     165                                                        5779   10.07    0.03  1.0000
   7   0   1    6363     159                                                        5556   10.07   -0.03  1.0000
   7   0   1    6473     164                                                        5658   10.07   -0.03  1.0000
  -9   0  -1      68      11                                                          70    0.19   -0.01  1.0000
  -9   0  -1      65      10                                                          67    0.19   -0.01  1.0000
   9   0   1      70       9                                                          72    0.19    0.01  1.0000
   9   0   1      84      11                                                          86    0.19    0.01  1.0000
 -11   0  -1    1683      67                                                        2060   -8.40   -0.01  1.0000
 -11   0  -1    1661      68                                                        2036   -8.40   -0.01  1.0000
  11   0   1    1594      64                                                        1961   -8.40    0.01  1.0000
  11   0   1    1614      66                                                        1984   -8.40    0.01  1.0000
 -13   0  -1     702      33                                                         660   -1.53    0.00  1.0000
 -13   0  -1     734      35                                                         691   -1.53    0.00  1.0000
  13   0   1     706      30                                                         664   -1.53    0.00  1.0000
  13   0   1     721      32                                                         679   -1.53    0.00  1.0000
 -15   0  -1     261      26                                                         214    2.94   -0.01  1.0000
 -15   0  -1     293      30                                                         243    2.94   -0.01  1.0000
  15   0   1     291      27                                                         241    2.94    0.01  1.0000
  15   0   1     276      23                                                         228    2.94    0.01  1.0000
 -17   0  -1     300      40                                                         325    1.39   -0.01  1.0000
 -17   0  -1     346      36                                                         373    1.39   -0.01  1.0000
 -17   1   1       0      15                                                         -16    0.12    0.02  1.0000
 -17   1   1       5      17                                                           5    0.12    0.02  1.0000
  16  -1  -1    1072      50                                                        1135   -1.82    0.01  1.0000
  16  -1  -1    1101      47                                                        1165   -1.82    0.01  1.0000
 -16   1   1    1021      51                                                        1082   -1.82   -0.01  1.0000
 -16   1   1    1110      55                                                        1174   -1.82   -0.01  1.0000
  15  -1  -1      10      11                                                          13   -0.90    0.01  1.0000
  15  -1  -1       0      10                                                          -1   -0.90    0.01  1.0000
 -15   1   1       0      12                                                         -26   -0.90   -0.01  1.0000
 -15   1   1       0      11                                                         -11   -0.90   -0.01  1.0000
  14  -1  -1    1351      47                                                        1302   -1.31   -0.02  1.0000
 -14   1   1    1290      51                                                        1242   -1.31    0.02  1.0000
 -14   1   1    1361      52                                                        1311   -1.31    0.02  1.0000
  13  -1  -1      16       8                                                          26   -2.09    0.00  1.0000
  13  -1  -1      11       8                                                          19   -2.09    0.00  1.0000
 -13   1   1      19      10                                                          30   -2.09    0.00  1.0000
 -13   1   1      11       9                                                          19   -2.09    0.00  1.0000
  12  -1  -1     236      19                                                         268    1.93   -0.02  1.0000
  12  -1  -1     251      18                                                         284    1.93   -0.02  1.0000
 -12   1   1     282      21                                                         317    1.93    0.02  1.0000
 -12   1   1     241      20                                                         273    1.93    0.02  1.0000
  11  -1  -1     189      16                                                         193    0.30   -0.03  1.0000
  11  -1  -1     188      14                                                         192    0.30   -0.03  1.0000
 -11   1   1     189      17                                                         193    0.30    0.03  1.0000
 -11   1   1     162      15                                                         166    0.30    0.03  1.0000
  10  -1  -1    8195     201                                                        6954   13.74   -0.03  1.0000
  10  -1  -1    8462     208                                                        7200   13.74   -0.03  1.0000
 -10   1   1    8685     205                                                        7405   13.74    0.03  1.0000
 -10   1   1    8439     209                                                        7178   13.74    0.03  1.0000
   9  -1  -1     721      32                                                         863   -4.88    0.00  1.0000
   9  -1  -1     784      34                                                         932   -4.88    0.00  1.0000
  -9   1   1     796      34                                                         945   -4.88    0.00  1.0000
  -9   1   1     775      35                                                         922   -4.88    0.00  1.0000
   8  -1  -1     415      31                                                         846   16.80   -0.11  1.0000
   8  -1  -1     424      32                                                         859   16.80   -0.11  1.0000
  -8   1   1     535      34                                                        1015   16.80    0.11  1.0000
  -8   1   1     433      32                                                         872   16.80    0.11  1.0000
   7  -1  -1    4192     146                                                        5065   12.37   -0.08  1.0000
   7  -1  -1    4278     151                                                        5160   12.37   -0.08  1.0000
  -7   1   1    4362     152                                                        5252   12.37    0.08  1.0000
  -7   1   1    4458     148                                                        5358   12.37    0.08  1.0000
   6  -1  -1    3882     109                                                        3691   -2.99   -0.06  1.0000
   6  -1  -1    4094     112                                                        3898   -2.99   -0.06  1.0000
  -6   1   1    4101     113                                                        3905   -2.99    0.06  1.0000
  -6   1   1    4099     110                                                        3903   -2.99    0.06  1.0000
   5  -1  -1    4328     123                                                        4169    2.35    0.00  1.0000
   5  -1  -1    4312     119                                                        4153    2.35    0.00  1.0000
  -5   1   1    4522     120                                                        4360    2.35    0.00  1.0000
  -5   1   1    4467     123                                                        4306    2.35    0.00  1.0000
   4  -1  -1   20825     870                                                       29761  -54.26    0.08  1.0000
   4  -1  -1   19085     846                                                       27673  -54.26    0.08  1.0000
  -4   1   1   24158     880                                                       33721  -54.26   -0.08  1.0000
  -4   1   1   23121     855                                                       32494  -54.26   -0.08  1.0000
   3  -1  -1   31645     726                                                       24340  -42.09    0.03  1.0000
   3  -1  -1   32154     708                                                       24787  -42.09    0.03  1.0000
  -3   1   1   36327     714                                                       28466  -42.09   -0.03  1.0000
  -3   1   1   32982     727                                                       25514  -42.09   -0.03  1.0000
   2  -1  -1    3686       5                                                          38 -123.84    0.00  1.0000
   2  -1  -1    3774       5                                                          24 -123.84    0.00  1.0000
  -2   1   1    3625       5                                                          50 -123.84    0.00  1.0000
  -2   1   1    3598       5                                                          56 -123.84    0.00  1.0000
  -1   1   1   19413     329                                                       11867   58.48    0.11  1.0000
   1   1   1    5795     129                                                        4579  -16.27    0.09  1.0000
  -2  -1  -1    1245      14                                                         342   32.35   -0.11  1.0000
   2   1   1    1464      15                                                         461   32.35    0.11  1.0000
   2   1   1    1365      14                                                         406   32.35    0.11  1.0000
  -3  -1  -1   12913     493                                                       16974  -32.03    0.07  1.0000
  -3  -1  -1   14378     483                                                       18648  -32.03    0.07  1.0000
   3   1   1   12833     483                                                       16883  -32.03   -0.07  1.0000
   3   1   1   13176     497                                                       17276  -32.03   -0.07  1.0000
  -4  -1  -1   20622     351                                                       12874   57.99    0.01  1.0000
  -4  -1  -1   20627     356                                                       12878   57.99    0.01  1.0000
   4   1   1   20172     353                                                       12519   57.99   -0.01  1.0000
   4   1   1   20375     362                                                       12679   57.99   -0.01  1.0000
  -5  -1  -1       3       8                                                         110   17.54   -0.05  1.0000
  -5  -1  -1       5       8                                                         125   17.54   -0.05  1.0000
   5   1   1       4       8                                                         117   17.54    0.05  1.0000
   5   1   1       2       7                                                         104   17.54    0.05  1.0000
  -6  -1  -1    7217     283                                                       10381   32.59    0.07  1.0000
  -6  -1  -1    7167     291                                                       10321   32.59    0.07  1.0000
   6   1   1    7070     282                                                       10204   32.59   -0.07  1.0000
   6   1   1    7102     290                                                       10243   32.59   -0.07  1.0000
  -7  -1  -1    1103      37                                                        1102    0.02   -0.02  1.0000
  -7  -1  -1    1099      38                                                        1098    0.02   -0.02  1.0000
   7   1   1    1165      38                                                        1164    0.02    0.02  1.0000
   7   1   1    1074      36                                                        1073    0.02    0.02  1.0000
  -8  -1  -1     485      23                                                         545    2.55   -0.02  1.0000
  -8  -1  -1     571      25                                                         636    2.55   -0.02  1.0000
   8   1   1     499      22                                                         560    2.55    0.02  1.0000
   8   1   1     511      23                                                         573    2.55    0.02  1.0000
  -9  -1  -1    1168      43                                                        1263    2.61    0.03  1.0000
  -9  -1  -1    1138      43                                                        1231    2.61    0.03  1.0000
   9   1   1    1066      40                                                        1156    2.61   -0.03  1.0000
   9   1   1    1154      43                                                        1248    2.61   -0.03  1.0000
 -10  -1  -1    6665     204                                                        6931   -3.11    0.04  1.0000
 -10  -1  -1    6845     199                                                        7114   -3.11    0.04  1.0000
  10   1   1    6517     196                                                        6780   -3.11   -0.04  1.0000
  10   1   1    6884     203                                                        7154   -3.11   -0.04  1.0000
 -11  -1  -1       1       6                                                           2   -1.29    0.01  1.0000
 -11  -1  -1       0       7                                                           1   -1.29    0.01  1.0000
  11   1   1       0       5                                                          -2   -1.29   -0.01  1.0000
  11   1   1       0       5                                                          -4   -1.29   -0.01  1.0000
 -12  -1  -1       8       7                                                           3   -2.17    0.01  1.0000
 -12  -1  -1      22       8                                                          13   -2.17    0.01  1.0000
  12   1   1      10       6                                                           4   -2.17   -0.01  1.0000
  12   1   1       1       6                                                           0   -2.17   -0.01  1.0000
 -13  -1  -1      96      11                                                          71   -2.60    0.00  1.0000
 -13  -1  -1     104      13                                                          78   -2.60    0.00  1.0000
  13   1   1      97      11                                                          72   -2.60    0.00  1.0000
  13   1   1     101      11                                                          76   -2.60    0.00  1.0000
 -14  -1  -1    1955      69                                                        1952   -0.07   -0.02  1.0000
 -14  -1  -1    1960      69                                                        1957   -0.07   -0.02  1.0000
  14   1   1    1916      64                                                        1913   -0.07    0.02  1.0000
 -15  -1  -1     127      19                                                         116   -0.96    0.01  1.0000
  15   1   1     149      16                                                         137   -0.96   -0.01  1.0000
  15   1   1     144      19                                                         132   -0.96   -0.01  1.0000
 -16  -1  -1    1235      54                                                        1200    0.95    0.00  1.0000
  16   1   1    1164      50                                                        1130    0.95    0.00  1.0000
  16   1   1    1198      46                                                        1164    0.95    0.00  1.0000
 -17   2   1      49      17                                                          44    0.73    0.02  1.0000
 -17   2   1      40      20                                                          35    0.73    0.02  1.0000
  16  -2  -1       0      14                                                         -17    0.63   -0.01  1.0000
  16  -2  -1       0      13                                                          -9    0.63   -0.01  1.0000
 -16   2   1       0      17                                                          -4    0.63    0.01  1.0000
 -16   2   1      12      15                                                          14    0.63    0.01  1.0000
  15  -2  -1      86      15                                                          66   -2.19    0.00  1.0000
  15  -2  -1     104      14                                                          82   -2.19    0.00  1.0000
 -15   2   1      80      15                                                          61   -2.19    0.00  1.0000
 -15   2   1      94      17                                                          73   -2.19    0.00  1.0000
  14  -2  -1     132      16                                                         137   -0.43    0.02  1.0000
 -14   2   1     120      18                                                         125   -0.43   -0.02  1.0000
 -14   2   1     139      17                                                         144   -0.43   -0.02  1.0000
  13  -2  -1     140      17                                                         154   -1.08    0.01  1.0000
  13  -2  -1     134      18                                                         147   -1.08    0.01  1.0000
 -13   2   1     172      21                                                         187   -1.08   -0.01  1.0000
 -13   2   1     101      17                                                         113   -1.08   -0.01  1.0000
  12  -2  -1       1       7                                                           9   -3.92    0.01  1.0000
 -12   2   1       1       8                                                           8   -3.92   -0.01  1.0000
 -12   2   1       0       7                                                           4   -3.92   -0.01  1.0000
  11  -2  -1     836      41                                                        1065    7.16    0.03  1.0000
  11  -2  -1     771      38                                                         991    7.16    0.03  1.0000
 -11   2   1     851      42                                                        1082    7.16   -0.03  1.0000
 -11   2   1     877      42                                                        1111    7.16   -0.03  1.0000
  10  -2  -1     112      16                                                         172   -4.89   -0.03  1.0000
  10  -2  -1     117      15                                                         179   -4.89   -0.03  1.0000
 -10   2   1     123      17                                                         186   -4.89    0.03  1.0000
 -10   2   1     109      17                                                         169   -4.89    0.03  1.0000
   9  -2  -1      79       7                                                          36    5.64   -0.02  1.0000
  -9   2   1      67       7                                                          28    5.64    0.02  1.0000
   8  -2  -1      35       7                                                          51    2.29    0.04  1.0000
   8  -2  -1      30       6                                                          45    2.29    0.04  1.0000
  -8   2   1      17       6                                                          28    2.29   -0.04  1.0000
  -8   2   1      22       6                                                          34    2.29   -0.04  1.0000
   7  -2  -1     276       9                                                         107  -12.06    0.01  1.0000
   7  -2  -1     210       8                                                          68  -12.06    0.01  1.0000
  -7   2   1     243       9                                                          87  -12.06   -0.01  1.0000
  -7   2   1     250      10                                                          91  -12.06   -0.01  1.0000
   6  -2  -1    2682      67                                                        2147  -10.48   -0.05  1.0000
   6  -2  -1    2647      65                                                        2116  -10.48   -0.05  1.0000
  -6   2   1    2814      68                                                        2266  -10.48    0.05  1.0000
  -6   2   1    2800      66                                                        2253  -10.48    0.05  1.0000
   5  -2  -1    6763     160                                                        5690   13.10   -0.11  1.0000
   5  -2  -1    6650     164                                                        5586   13.10   -0.11  1.0000
  -5   2   1    6994     161                                                        5902   13.10    0.11  1.0000
  -5   2   1    6809     165                                                        5732   13.10    0.11  1.0000
   4  -2  -1     123       8                                                          99   -2.23   -0.04  1.0000
   4  -2  -1     101       7                                                          79   -2.23   -0.04  1.0000
  -4   2   1     109       7                                                          86   -2.23    0.04  1.0000
  -4   2   1     110       7                                                          87   -2.23    0.04  1.0000
   3  -2  -1       7      13                                                         290  -27.75    0.08  1.0000
   3  -2  -1       6      12                                                         287  -27.75    0.08  1.0000
  -3   2   1      11      13                                                         316  -27.75   -0.08  1.0000
  -3   2   1      10      12                                                         309  -27.75   -0.08  1.0000
   2  -2  -1      88       4                                                          36    6.55    0.01  1.0000
  -2   2   1     113       4                                                          52    6.55   -0.01  1.0000
   1  -2  -1     438       7                                                         127  -18.57    0.03  1.0000
   0  -2  -1       2       1                                                         -16    2.56    0.02  1.0000
   0  -2  -1       2       2                                                         -14    2.56    0.02  1.0000
   0   2   1       2       2                                                         -13    2.56   -0.02  1.0000
  -1  -2  -1    2639      24                                                         801   44.39   -0.16  1.0000
   1   2   1    2481      23                                                         715   44.39    0.16  1.0000
   1   2   1    2550      23                                                         752   44.39    0.16  1.0000
  -2  -2  -1    8109     175                                                        6296   20.59    0.09  1.0000
   2   2   1    8092     173                                                        6281   20.59   -0.09  1.0000
  -3  -2  -1    2414     105                                                        3761  -23.47    0.04  1.0000
   3   2   1    2412     105                                                        3759  -23.47   -0.04  1.0000
  -4  -2  -1    1614      43                                                        1462    3.73    0.01  1.0000
   4   2   1    1636      44                                                        1483    3.73   -0.01  1.0000
   4   2   1    1508      43                                                        1361    3.73   -0.01  1.0000
  -5  -2  -1     944      22                                                         636   10.59    0.01  1.0000
   5   2   1     968      23                                                         656   10.59   -0.01  1.0000
   5   2   1     935      22                                                         629   10.59   -0.01  1.0000
  -6  -2  -1      20       4                                                          21   17.23    0.01  1.0000
   6   2   1      31       4                                                          12   17.23   -0.01  1.0000
   6   2   1      57       3                                                           2   17.23   -0.01  1.0000
  -7  -2  -1    1143      55                                                        1758   15.63    0.01  1.0000
   7   2   1    1131      53                                                        1743   15.63   -0.01  1.0000
   7   2   1    1158      55                                                        1777   15.63   -0.01  1.0000
  -8  -2  -1     688      22                                                         549    5.39    0.02  1.0000
   8   2   1     680      22                                                         542    5.39   -0.02  1.0000
   8   2   1     651      21                                                         516    5.39   -0.02  1.0000
  -9  -2  -1     560      25                                                         624   -2.53    0.05  1.0000
   9   2   1     577      26                                                         642   -2.53   -0.05  1.0000
   9   2   1     515      23                                                         576   -2.53   -0.05  1.0000
 -10  -2  -1     193      13                                                         124   -5.34    0.00  1.0000
  10   2   1     177      11                                                         111   -5.34    0.00  1.0000
  10   2   1     192      13                                                         123   -5.34    0.00  1.0000
 -11  -2  -1    1619      52                                                        1479   -3.43    0.01  1.0000
  11   2   1    1627      49                                                        1486   -3.43   -0.01  1.0000
  11   2   1    1676      52                                                        1533   -3.43   -0.01  1.0000
 -12  -2  -1      31       8                                                          16   -2.98    0.00  1.0000
  12   2   1      21       6                                                           9   -2.98    0.00  1.0000
  12   2   1      25       6                                                          12   -2.98    0.00  1.0000
 -13  -2  -1     200      22                                                         230   -1.98   -0.02  1.0000
  13   2   1     169      18                                                         197   -1.98    0.02  1.0000
  13   2   1     148      16                                                         174   -1.98    0.02  1.0000
 -14  -2  -1       1      11                                                          -3   -1.55    0.00  1.0000
  14   2   1       5       8                                                           2   -1.55    0.00  1.0000
  14   2   1      14       9                                                           9   -1.55    0.00  1.0000
 -15  -2  -1      60      15                                                          58   -0.30   -0.01  1.0000
  15   2   1      31      12                                                          29   -0.30    0.01  1.0000
  15   2   1      37      11                                                          35   -0.30    0.01  1.0000
 -16  -2  -1       0      15                                                          -8    0.71   -0.02  1.0000
  16   2   1       8      14                                                           6    0.71    0.02  1.0000
  17   2   1      93      20                                                          93   -0.01    0.03  1.0000
 -17   3   1       0      20                                                          -2    0.47    0.00  1.0000
 -17   3   1      22      16                                                          20    0.47    0.00  1.0000
  16  -3  -1    1150      51                                                        1168   -0.50    0.00  1.0000
 -16   3   1    1165      57                                                        1183   -0.50    0.00  1.0000
 -16   3   1    1030      52                                                        1047   -0.50    0.00  1.0000
  15  -3  -1      13      12                                                           8    1.43    0.00  1.0000
  15  -3  -1      13      12                                                           8    1.43    0.00  1.0000
 -15   3   1      26      15                                                          19    1.43    0.00  1.0000
 -15   3   1       1      13                                                          -3    1.43    0.00  1.0000
  14  -3  -1    1843      63                                                        1833   -0.23   -0.03  1.0000
  14  -3  -1    1605      64                                                        1595   -0.23   -0.03  1.0000
 -14   3   1    1754      66                                                        1744   -0.23    0.03  1.0000
 -14   3   1    1853      68                                                        1843   -0.23    0.03  1.0000
  13  -3  -1      56      11                                                          37   -2.70    0.00  1.0000
 -13   3   1      44      11                                                          27   -2.70    0.00  1.0000
 -13   3   1      42      10                                                          26   -2.70    0.00  1.0000
  12  -3  -1      46      11                                                          70    3.12   -0.01  1.0000
  12  -3  -1      28      10                                                          48    3.12   -0.01  1.0000
 -12   3   1      41      12                                                          64    3.12    0.01  1.0000
 -12   3   1      42      11                                                          65    3.12    0.01  1.0000
  11  -3  -1      30      10                                                          58   -4.09    0.01  1.0000
  11  -3  -1      34      10                                                          63   -4.09    0.01  1.0000
 -11   3   1      39      11                                                          70   -4.09   -0.01  1.0000
 -11   3   1      37      11                                                          67   -4.09   -0.01  1.0000
  10  -3  -1    2399      73                                                        2300    1.97   -0.03  1.0000
  10  -3  -1    2397      75                                                        2298    1.97   -0.03  1.0000
 -10   3   1    2387      77                                                        2288    1.97    0.03  1.0000
 -10   3   1    2392      74                                                        2293    1.97    0.03  1.0000
   9  -3  -1      81      13                                                         142    5.67   -0.10  1.0000
   9  -3  -1      90      14                                                         154    5.67   -0.10  1.0000
  -9   3   1      77      14                                                         138    5.67    0.10  1.0000
  -9   3   1      93      14                                                         159    5.67    0.10  1.0000
   8  -3  -1    2174      92                                                        2949   14.76   -0.07  1.0000
   8  -3  -1    2414      96                                                        3227   14.76   -0.07  1.0000
  -8   3   1    2275      93                                                        3066   14.76    0.07  1.0000
  -8   3   1    2312      96                                                        3109   14.76    0.07  1.0000
   7  -3  -1    2913      97                                                        3143   -4.02   -0.06  1.0000
   7  -3  -1    3197     101                                                        3438   -4.02   -0.06  1.0000
  -7   3   1    3106      98                                                        3343   -4.02    0.06  1.0000
  -7   3   1    3066     101                                                        3302   -4.02    0.06  1.0000
   6  -3  -1   16076     508                                                       17945   13.80    0.00  1.0000
   6  -3  -1   16533     522                                                       18428   13.80    0.00  1.0000
  -6   3   1   17391     523                                                       19333   13.80    0.00  1.0000
  -6   3   1   16864     509                                                       18777   13.80    0.00  1.0000
   5  -3  -1    1281      46                                                        1468    4.86   -0.12  1.0000
   5  -3  -1    1193      45                                                        1374    4.86   -0.12  1.0000
  -5   3   1    1225      46                                                        1408    4.86    0.12  1.0000
  -5   3   1    1186      45                                                        1366    4.86    0.12  1.0000
   4  -3  -1   20875     894                                                       29257  -51.12    0.01  1.0000
   4  -3  -1   21016     870                                                       29424  -51.12    0.01  1.0000
  -4   3   1   25955     889                                                       35221  -51.12   -0.01  1.0000
  -4   3   1   24577     911                                                       33613  -51.12   -0.01  1.0000
   3  -3  -1     114       5                                                          21   28.91   -0.20  1.0000
  -3   3   1     105       5                                                          25   28.91    0.20  1.0000
  -3   3   1      91       6                                                          33   28.91    0.20  1.0000
   2  -3  -1       6      45                                                        1383  -76.09   -0.03  1.0000
  -2   3   1       1      46                                                        1492  -76.09    0.03  1.0000
  -2   3   1       0      45                                                        1535  -76.09    0.03  1.0000
   1  -3  -1    1885      13                                                         319  -49.20   -0.01  1.0000
  -1   3   1    1897      13                                                         324  -49.20    0.01  1.0000
   0  -3  -1   13821     242                                                        8698  -46.76   -0.02  1.0000
   0   3   1   14240     244                                                        9031  -46.76    0.02  1.0000
   0   3   1   13856     242                                                        8726  -46.76    0.02  1.0000
  -1  -3  -1     689      31                                                        1011  -10.70    0.03  1.0000
  -1  -3  -1     640      31                                                         952  -10.70    0.03  1.0000
   1   3   1     646      31                                                         959  -10.70   -0.03  1.0000
   1   3   1     710      31                                                        1037  -10.70   -0.03  1.0000
  -2  -3  -1     518       2                                                         -10   43.80    0.06  1.0000
   2   3   1     518       2                                                          -6   43.80   -0.06  1.0000
   2   3   1     518       2                                                          -5   43.80   -0.06  1.0000
  -3  -3  -1     897      40                                                        1321   12.30   -0.06  1.0000
   3   3   1     891      40                                                        1313   12.30    0.06  1.0000
  -4  -3  -1   10885     195                                                        7214   37.34    0.02  1.0000
   4   3   1   10489     194                                                        6893   37.34   -0.02  1.0000
  -5  -3  -1    1867      66                                                        2254   -8.21    0.00  1.0000
   5   3   1    1791      65                                                        2170   -8.21    0.00  1.0000
   5   3   1    1844      67                                                        2229   -8.21    0.00  1.0000
  -6  -3  -1   21113     596                                                       21797    4.49    0.01  1.0000
   6   3   1   20653     591                                                       21329    4.49   -0.01  1.0000
   6   3   1   21303     613                                                       21990    4.49   -0.01  1.0000
  -7  -3  -1     247      20                                                         475   11.68   -0.11  1.0000
   7   3   1     225      18                                                         444   11.68    0.11  1.0000
   7   3   1     252      20                                                         482   11.68    0.11  1.0000
  -8  -3  -1    1682      66                                                        2147   10.24    0.02  1.0000
   8   3   1    1705      67                                                        2173   10.24   -0.02  1.0000
   8   3   1    1608      64                                                        2063   10.24   -0.02  1.0000
  -9  -3  -1      11       5                                                           5    3.09    0.01  1.0000
   9   3   1      15       5                                                           8    3.09   -0.01  1.0000
   9   3   1       3       4                                                          -5    3.09   -0.01  1.0000
 -10  -3  -1    3447     103                                                        3502   -0.90    0.04  1.0000
  10   3   1    3274     100                                                        3328   -0.90   -0.04  1.0000
  10   3   1    3469     105                                                        3524   -0.90   -0.04  1.0000
 -11  -3  -1       3       6                                                          -4   -3.29   -0.02  1.0000
  11   3   1       3       5                                                           0   -3.29    0.02  1.0000
  11   3   1      14       7                                                           4   -3.29    0.02  1.0000
 -12  -3  -1      76      11                                                          54   -2.64    0.01  1.0000
  12   3   1      74       8                                                          52   -2.64   -0.01  1.0000
  12   3   1      75       9                                                          53   -2.64   -0.01  1.0000
 -13  -3  -1       0       9                                                           2   -2.22    0.03  1.0000
  13   3   1       1       6                                                          -7   -2.22   -0.03  1.0000
  13   3   1       1       7                                                          -1   -2.22   -0.03  1.0000
 -14  -3  -1    1170      46                                                        1086   -2.40   -0.02  1.0000
  14   3   1    1154      39                                                        1071   -2.40    0.02  1.0000
  14   3   1    1208      44                                                        1123   -2.40    0.02  1.0000
 -15  -3  -1       0      13                                                          -9    0.01    0.01  1.0000
 -16  -3  -1     566      38                                                         562    0.16    0.01  1.0000
  16   3   1     567      36                                                         563    0.16   -0.01  1.0000
  16  -4  -1      12      16                                                          12    0.10    0.01  1.0000
 -16   4   1       0      15                                                          -8    0.10   -0.01  1.0000
 -16   4   1      11      18                                                          11    0.10   -0.01  1.0000
  15  -4  -1     380      32                                                         384   -0.20   -0.03  1.0000
 -15   4   1     266      28                                                         269   -0.20    0.03  1.0000
 -15   4   1     370      34                                                         374   -0.20    0.03  1.0000
  14  -4  -1     271      27                                                         275    0.25    0.03  1.0000
  14  -4  -1     289      27                                                         294    0.25    0.03  1.0000
 -14   4   1     205      25                                                         209    0.25   -0.03  1.0000
 -14   4   1     248      30                                                         252    0.25   -0.03  1.0000
  13  -4  -1     892      42                                                         975    2.62   -0.01  1.0000
 -13   4   1     898      45                                                         982    2.62    0.01  1.0000
 -13   4   1     907      45                                                         991    2.62    0.01  1.0000
  12  -4  -1       0       7                                                          -3   -0.79   -0.01  1.0000
  12  -4  -1       8       9                                                           6   -0.79   -0.01  1.0000
 -12   4   1      24       9                                                          20   -0.79    0.01  1.0000
 -12   4   1       6       9                                                           4   -0.79    0.01  1.0000
  11  -4  -1     161      18                                                         141    1.58   -0.04  1.0000
  11  -4  -1     155      17                                                         135    1.58   -0.04  1.0000
 -11   4   1     166      17                                                         145    1.58    0.04  1.0000
 -11   4   1     170      19                                                         149    1.58    0.04  1.0000
  10  -4  -1     314      20                                                         241   -4.21   -0.03  1.0000
  10  -4  -1     263      18                                                         197   -4.21   -0.03  1.0000
 -10   4   1     297      20                                                         226   -4.21    0.03  1.0000
 -10   4   1     285      20                                                         216   -4.21    0.03  1.0000
   9  -4  -1    2714      91                                                        2887    3.14   -0.01  1.0000
   9  -4  -1    2569      87                                                        2737    3.14   -0.01  1.0000
  -9   4   1    2713      92                                                        2886    3.14    0.01  1.0000
  -9   4   1    2689      89                                                        2861    3.14    0.01  1.0000
   8  -4  -1     333      33                                                         768  -18.22    0.01  1.0000
   8  -4  -1     345      32                                                         787  -18.22    0.01  1.0000
  -8   4   1     383      33                                                         843  -18.22   -0.01  1.0000
  -8   4   1     367      34                                                         820  -18.22   -0.01  1.0000
   7  -4  -1    1617      50                                                        1500    2.84    0.02  1.0000
   7  -4  -1    1677      52                                                        1558    2.84    0.02  1.0000
  -7   4   1    1660      51                                                        1542    2.84   -0.02  1.0000
  -7   4   1    1568      52                                                        1453    2.84   -0.02  1.0000
   6  -4  -1    2545      75                                                        2413    2.55   -0.09  1.0000
   6  -4  -1    2554      73                                                        2422    2.55   -0.09  1.0000
  -6   4   1    2360      75                                                        2233    2.55    0.09  1.0000
  -6   4   1    2547      73                                                        2415    2.55    0.09  1.0000
   5  -4  -1    2000      38                                                        1104  -22.11    0.09  1.0000
  -5   4   1    1962      38                                                        1076  -22.11   -0.09  1.0000
  -5   4   1    2023      39                                                        1121  -22.11   -0.09  1.0000
   4  -4  -1     384      20                                                         469    3.96   -0.05  1.0000
  -4   4   1     390      20                                                         476    3.96    0.05  1.0000
  -4   4   1     409      21                                                         497    3.96    0.05  1.0000
   3  -4  -1     239       7                                                          44   16.98   -0.02  1.0000
  -3   4   1     250       6                                                          49   16.98    0.02  1.0000
  -3   4   1     248       6                                                          48   16.98    0.02  1.0000
   2  -4  -1      39       5                                                          21   -3.14    0.04  1.0000
  -2   4   1      60       5                                                          37   -3.14   -0.04  1.0000
   1  -4  -1      46      14                                                         316   21.09   -0.06  1.0000
  -1   4   1      45      13                                                         313   21.09    0.06  1.0000
  -1   4   1      29      14                                                         268   21.09    0.06  1.0000
   0  -4  -1     405      16                                                         385   -0.97   -0.02  1.0000
   0   4   1     398      16                                                         378   -0.97    0.02  1.0000
   0   4   1     396      17                                                         376   -0.97    0.02  1.0000
  -1  -4  -1      44       7                                                          72  -29.07   -0.03  1.0000
  -1  -4  -1      32       7                                                          90  -29.07   -0.03  1.0000
   1   4   1      33       7                                                          89  -29.07    0.03  1.0000
   1   4   1      20       8                                                         113  -29.07    0.03  1.0000
   2   4   1      83       3                                                           9   11.87   -0.07  1.0000
   2   4   1      62       3                                                           3   11.87   -0.07  1.0000
  -3  -4  -1   10103     267                                                        9627    4.61   -0.03  1.0000
   3   4   1   10209     266                                                        9731    4.61    0.03  1.0000
   3   4   1   10268     267                                                        9788    4.61    0.03  1.0000
  -4  -4  -1    3251     187                                                        6695   47.73   -0.01  1.0000
   4   4   1    3282     186                                                        6740   47.73    0.01  1.0000
   4   4   1    3311     187                                                        6782   47.73    0.01  1.0000
  -5  -4  -1    3509     105                                                        3708    3.18    0.06  1.0000
   5   4   1    3392     104                                                        3587    3.18   -0.06  1.0000
  -6  -4  -1      24       4                                                           3    6.36   -0.01  1.0000
   6   4   1      39       4                                                          10    6.36    0.01  1.0000
   6   4   1      41       4                                                          11    6.36    0.01  1.0000
  -7  -4  -1     165      11                                                         133    2.51   -0.02  1.0000
   7   4   1     170      10                                                         138    2.51    0.02  1.0000
   7   4   1     159      11                                                         128    2.51    0.02  1.0000
  -8  -4  -1     993      32                                                         875   -3.72    0.00  1.0000
   8   4   1    1022      32                                                         902   -3.72    0.00  1.0000
   8   4   1     949      30                                                         834   -3.72    0.00  1.0000
  -9  -4  -1    2558      85                                                        2854    5.48    0.00  1.0000
   9   4   1    2461      83                                                        2752    5.48    0.00  1.0000
   9   4   1    2529      86                                                        2824    5.48    0.00  1.0000
 -10  -4  -1     224      17                                                         237   -0.80    0.01  1.0000
  10   4   1     245      17                                                         258   -0.80   -0.01  1.0000
  10   4   1     213      15                                                         225   -0.80   -0.01  1.0000
 -11  -4  -1      88      15                                                         111   -2.19    0.01  1.0000
  11   4   1      90      12                                                         113   -2.19   -0.01  1.0000
  11   4   1      84      14                                                         106   -2.19   -0.01  1.0000
 -12  -4  -1      24       9                                                           9   -3.74    0.00  1.0000
  12   4   1      19       8                                                           6   -3.74    0.00  1.0000
 -13  -4  -1    1013      39                                                         887   -3.93    0.00  1.0000
  13   4   1     980      36                                                         856   -3.93    0.00  1.0000
 -14  -4  -1     224      25                                                         229   -0.34   -0.01  1.0000
  14   4   1     246      22                                                         252   -0.34    0.01  1.0000
 -15  -4  -1     729      38                                                         694    1.25    0.02  1.0000
  15   4   1     633      28                                                         601    1.25   -0.02  1.0000
  16   4   1      36      15                                                          33   -0.43   -0.01  1.0000
 -16   5   1    1125      58                                                        1166   -1.18   -0.01  1.0000
 -16   5   1    1340      66                                                        1385   -1.18   -0.01  1.0000
  15  -5  -1      66      19                                                          82   -1.79    0.00  1.0000
 -15   5   1      35      19                                                          47   -1.79    0.00  1.0000
 -15   5   1      47      17                                                          61   -1.79    0.00  1.0000
  14  -5  -1     574      36                                                         591    0.68    0.01  1.0000
 -14   5   1     492      36                                                         508    0.68   -0.01  1.0000
 -14   5   1     538      36                                                         554    0.68   -0.01  1.0000
  13  -5  -1       0      11                                                          -9   -0.22    0.00  1.0000
 -13   5   1       7      14                                                           7   -0.22    0.00  1.0000
 -13   5   1       0      11                                                          -2   -0.22    0.00  1.0000
  12  -5  -1     209      23                                                         206   -0.19    0.05  1.0000
 -12   5   1     182      22                                                         179   -0.19   -0.05  1.0000
 -12   5   1     236      24                                                         233   -0.19   -0.05  1.0000
  11  -5  -1     159      18                                                         134   -1.96   -0.02  1.0000
 -11   5   1     152      17                                                         128   -1.96    0.02  1.0000
 -11   5   1     190      20                                                         163   -1.96    0.02  1.0000
  10  -5  -1   10260     271                                                        9438    7.97   -0.05  1.0000
  10  -5  -1   10269     263                                                        9447    7.97   -0.05  1.0000
 -10   5   1    9890     272                                                        9083    7.97    0.05  1.0000
 -10   5   1    9903     264                                                        9096    7.97    0.05  1.0000
   9  -5  -1     274      22                                                         363   -4.83   -0.02  1.0000
  -9   5   1     251      22                                                         337   -4.83    0.02  1.0000
  -9   5   1     295      23                                                         387   -4.83    0.02  1.0000
   8  -5  -1    1002      43                                                        1168    4.86    0.05  1.0000
  -8   5   1    1020      45                                                        1187    4.86   -0.05  1.0000
  -8   5   1    1036      45                                                        1205    4.86   -0.05  1.0000
   7  -5  -1     332      25                                                         521    8.88   -0.14  1.0000
  -7   5   1     368      26                                                         567    8.88    0.14  1.0000
  -7   5   1     359      26                                                         555    8.88    0.14  1.0000
   6  -5  -1    2386      67                                                        2162   -4.52    0.05  1.0000
  -6   5   1    2288      69                                                        2069   -4.52   -0.05  1.0000
  -6   5   1    2301      67                                                        2081   -4.52   -0.05  1.0000
   5  -5  -1     732      23                                                         516    8.35   -0.05  1.0000
  -5   5   1     726      23                                                         511    8.35    0.05  1.0000
   4  -5  -1    1800      61                                                        1929   -2.87    0.00  1.0000
  -4   5   1    1786      62                                                        1914   -2.87    0.00  1.0000
  -4   5   1    1827      61                                                        1956   -2.87    0.00  1.0000
   3  -5  -1    1253      33                                                         883  -10.93   -0.05  1.0000
  -3   5   1    1372      34                                                         984  -10.93    0.05  1.0000
  -3   5   1    1337      34                                                         954  -10.93    0.05  1.0000
   2  -5  -1    9215     360                                                       12838  -33.31   -0.04  1.0000
  -2   5   1    9901     360                                                       13645  -33.31    0.04  1.0000
  -2   5   1    9142     369                                                       12752  -33.31    0.04  1.0000
   1  -5  -1    7725     201                                                        7332    4.36    0.00  1.0000
  -1   5   1    7271     200                                                        6890    4.36    0.00  1.0000
  -1   5   1    7681     201                                                        7289    4.36    0.00  1.0000
   0  -5  -1   30582     805                                                       29155   -7.94    0.00  1.0000
   0   5   1   29427     798                                                       28028   -7.94    0.00  1.0000
   0   5   1   30943     795                                                       29508   -7.94    0.00  1.0000
  -1  -5  -1     897      19                                                         475  -15.72    0.02  1.0000
   1   5   1     866      19                                                         452  -15.72   -0.02  1.0000
   1   5   1     849      18                                                         440  -15.72   -0.02  1.0000
  -2  -5  -1   11650     311                                                       11714   -0.57    0.07  1.0000
  -2  -5  -1   10926     310                                                       10988   -0.57    0.07  1.0000
   2   5   1   11246     310                                                       11310   -0.57   -0.07  1.0000
   2   5   1   11032     309                                                       11095   -0.57   -0.07  1.0000
  -3  -5  -1       1       5                                                          27  -10.55   -0.08  1.0000
   3   5   1       1       5                                                          36  -10.55    0.08  1.0000
   3   5   1       1       5                                                          25  -10.55    0.08  1.0000
  -4  -5  -1    4898     107                                                        3745   16.91    0.02  1.0000
   4   5   1    4783     107                                                        3645   16.91   -0.02  1.0000
   4   5   1    4920     106                                                        3765   16.91   -0.02  1.0000
  -5  -5  -1     621      34                                                         991   12.62   -0.08  1.0000
   5   5   1     598      33                                                         962   12.62    0.08  1.0000
   5   5   1     643      33                                                        1019   12.62    0.08  1.0000
  -6  -5  -1    3022     122                                                        4254   19.73   -0.05  1.0000
   6   5   1    3014     120                                                        4244   19.73    0.05  1.0000
   6   5   1    2966     121                                                        4188   19.73    0.05  1.0000
  -7  -5  -1      62      10                                                          74    1.36   -0.06  1.0000
   7   5   1      68       9                                                          80    1.36    0.06  1.0000
   7   5   1      76      10                                                          89    1.36    0.06  1.0000
   7   5   1      78      10                                                          91    1.36    0.06  1.0000
  -8  -5  -1    2959      80                                                        2655   -5.53    0.00  1.0000
   8   5   1    2990      82                                                        2684   -5.53    0.00  1.0000
   8   5   1    2932      79                                                        2629   -5.53    0.00  1.0000
  -9  -5  -1      14       6                                                          13   -0.16   -0.02  1.0000
   9   5   1       0       5                                                          -3   -0.16    0.02  1.0000
   9   5   1       7       5                                                           7   -0.16    0.02  1.0000
 -10  -5  -1    8335     233                                                        8317    0.19    0.00  1.0000
  10   5   1    8229     238                                                        8211    0.19    0.00  1.0000
 -11  -5  -1      11       8                                                           8    0.83    0.01  1.0000
  11   5   1       6       7                                                           4    0.83   -0.01  1.0000
 -12  -5  -1      80      13                                                          99   -1.90    0.01  1.0000
  12   5   1      77      12                                                          95   -1.90   -0.01  1.0000
 -13  -5  -1     230      24                                                         301   -4.21    0.01  1.0000
  13   5   1     221      19                                                         291   -4.21   -0.01  1.0000
  13   5   1     210      22                                                         278   -4.21   -0.01  1.0000
 -14  -5  -1     889      40                                                         842   -1.55   -0.01  1.0000
  14   5   1     889      39                                                         842   -1.55    0.01  1.0000
  14   5   1     891      32                                                         844   -1.55    0.01  1.0000
 -15  -5  -1     188      19                                                         157   -2.29    0.00  1.0000
  15   5   1     241      17                                                         205   -2.29    0.00  1.0000
  16   5   1    1103      49                                                        1124   -0.60    0.00  1.0000
  16   5   1    1181      42                                                        1202   -0.60    0.00  1.0000
  15  -6  -1       8      19                                                           7   -0.45    0.00  1.0000
 -15   6   1       0      16                                                          -8   -0.45    0.00  1.0000
 -15   6   1       0      15                                                         -11   -0.45    0.00  1.0000
  14  -6  -1     314      33                                                         301    0.72    0.00  1.0000
 -14   6   1     315      33                                                         302    0.72    0.00  1.0000
 -14   6   1     322      34                                                         309    0.72    0.00  1.0000
  13  -6  -1      26      14                                                          25    0.19   -0.01  1.0000
 -13   6   1      20      13                                                          19    0.19    0.01  1.0000
 -13   6   1      28      13                                                          27    0.19    0.01  1.0000
  12  -6  -1     588      33                                                         554   -1.37   -0.03  1.0000
 -12   6   1     534      33                                                         502   -1.37    0.03  1.0000
 -12   6   1     579      32                                                         545   -1.37    0.03  1.0000
  11  -6  -1     256      27                                                         386    7.00   -0.06  1.0000
 -11   6   1     255      28                                                         385    7.00    0.06  1.0000
 -11   6   1     236      26                                                         361    7.00    0.06  1.0000
  10  -6  -1    1009      49                                                        1248   -6.84    0.03  1.0000
 -10   6   1     989      51                                                        1225   -6.84   -0.03  1.0000
 -10   6   1    1016      50                                                        1255   -6.84   -0.03  1.0000
   9  -6  -1     952      41                                                        1018   -2.03   -0.01  1.0000
  -9   6   1     944      42                                                        1010   -2.03    0.01  1.0000
  -9   6   1     937      43                                                        1003   -2.03    0.01  1.0000
   8  -6  -1     639      29                                                         622   -0.66   -0.03  1.0000
  -8   6   1     625      30                                                         608   -0.66    0.03  1.0000
  -8   6   1     613      30                                                         596   -0.66    0.03  1.0000
   7  -6  -1      52       6                                                           4  -10.03    0.03  1.0000
  -7   6   1      72       6                                                          11  -10.03   -0.03  1.0000
  -7   6   1      87       7                                                          17  -10.03   -0.03  1.0000
   6  -6  -1       0      10                                                          64  -15.26    0.00  1.0000
  -6   6   1       0       9                                                          63  -15.26    0.00  1.0000
  -6   6   1       0      10                                                          63  -15.26    0.00  1.0000
   5  -6  -1     178      14                                                         152    1.93    0.00  1.0000
  -5   6   1     151      13                                                         127    1.93    0.00  1.0000
  -5   6   1     172      14                                                         147    1.93    0.00  1.0000
   4  -6  -1     194      16                                                         222   -1.89    0.02  1.0000
  -4   6   1     140      13                                                         164   -1.89   -0.02  1.0000
  -4   6   1     185      15                                                         213   -1.89   -0.02  1.0000
   3  -6  -1      66       7                                                          26    5.78   -0.02  1.0000
  -3   6   1      62       6                                                          24    5.78    0.02  1.0000
  -3   6   1      56       6                                                          20    5.78    0.02  1.0000
   2  -6  -1     153      14                                                         230    5.39    0.03  1.0000
  -2   6   1     176      15                                                         258    5.39   -0.03  1.0000
  -2   6   1     161      16                                                         240    5.39   -0.03  1.0000
  -2   6   1     160      15                                                         239    5.39   -0.03  1.0000
   1  -6  -1       2       6                                                          31    7.70    0.00  1.0000
  -1   6   1       5       7                                                          38    7.70    0.00  1.0000
  -1   6   1       1       5                                                          27    7.70    0.00  1.0000
   0  -6  -1    1084      30                                                         824    8.11   -0.01  1.0000
   0   6   1    1043      31                                                         789    8.11    0.01  1.0000
   0   6   1    1040      29                                                         786    8.11    0.01  1.0000
  -1  -6  -1      77       9                                                          58    2.23    0.01  1.0000
   1   6   1      83       8                                                          63    2.23   -0.01  1.0000
   1   6   1      95      10                                                          74    2.23   -0.01  1.0000
  -2  -6  -1     817      57                                                        1851   27.78   -0.01  1.0000
   2   6   1     764      57                                                        1771   27.78    0.01  1.0000
   2   6   1     789      56                                                        1809   27.78    0.01  1.0000
  -3  -6  -1     989      22                                                         523  -16.51    0.01  1.0000
   3   6   1    1034      22                                                         556  -16.51   -0.01  1.0000
   3   6   1    1007      23                                                         536  -16.51   -0.01  1.0000
  -4  -6  -1    1477      40                                                        1192    7.52    0.01  1.0000
   4   6   1    1411      39                                                        1133    7.52   -0.01  1.0000
   4   6   1    1408      38                                                        1130    7.52   -0.01  1.0000
  -5  -6  -1     749      27                                                         711    1.34    0.04  1.0000
   5   6   1     726      27                                                         689    1.34   -0.04  1.0000
   5   6   1     734      26                                                         697    1.34   -0.04  1.0000
  -6  -6  -1    7007     235                                                        8399   15.28   -0.02  1.0000
   6   6   1    7080     234                                                        8479   15.28    0.02  1.0000
   6   6   1    7005     235                                                        8397   15.28    0.02  1.0000
  -7  -6  -1     476      30                                                         761   11.08   -0.03  1.0000
   7   6   1     491      29                                                         779   11.08    0.03  1.0000
   7   6   1     531      29                                                         829   11.08    0.03  1.0000
  -8  -6  -1    3068      91                                                        2996    1.26   -0.02  1.0000
   8   6   1    3174      94                                                        3101    1.26    0.02  1.0000
   8   6   1    3186      89                                                        3113    1.26    0.02  1.0000
   8   6   1    3015      90                                                        2944    1.26    0.02  1.0000
  -9  -6  -1    1301      44                                                        1301   -0.01   -0.02  1.0000
   9   6   1    1072      44                                                        1072   -0.01    0.02  1.0000
   9   6   1    1330      42                                                        1330   -0.01    0.02  1.0000
   9   6   1    1285      42                                                        1285   -0.01    0.02  1.0000
 -10  -6  -1    1189      37                                                         968   -6.49   -0.02  1.0000
  10   6   1    1170      34                                                         951   -6.49    0.02  1.0000
  10   6   1    1125      37                                                         910   -6.49    0.02  1.0000
 -11  -6  -1      61      10                                                          46   -1.96   -0.03  1.0000
  11   6   1      90      11                                                          72   -1.96    0.03  1.0000
  11   6   1      71       9                                                          55   -1.96    0.03  1.0000
 -12  -6  -1     984      42                                                        1043   -1.78   -0.02  1.0000
  12   6   1     983      41                                                        1042   -1.78    0.02  1.0000
  12   6   1    1041      38                                                        1101   -1.78    0.02  1.0000
  12   6   1     952      37                                                        1010   -1.78    0.02  1.0000
 -13  -6  -1     193      22                                                         173    1.40    0.01  1.0000
  13   6   1     204      21                                                         184    1.40   -0.01  1.0000
  13   6   1     205      16                                                         185    1.40   -0.01  1.0000
  13   6   1     207      17                                                         187    1.40   -0.01  1.0000
 -14  -6  -1     755      37                                                         736   -0.66   -0.01  1.0000
  14   6   1     650      27                                                         633   -0.66    0.01  1.0000
  14   6   1     680      28                                                         662   -0.66    0.01  1.0000
 -15  -6  -1      20      15                                                          10   -2.41    0.01  1.0000
  15   6   1      25      13                                                          14   -2.41   -0.01  1.0000
  15   6   1      24       9                                                          13   -2.41   -0.01  1.0000
  15  -7  -1      81      23                                                          70    1.19    0.00  1.0000
 -15   7   1      99      20                                                          87    1.19    0.00  1.0000
 -15   7   1      88      22                                                          77    1.19    0.00  1.0000
  14  -7  -1    1362      62                                                        1386    0.61    0.04  1.0000
 -14   7   1    1300      63                                                        1323    0.61   -0.04  1.0000
 -14   7   1    1241      60                                                        1264    0.61   -0.04  1.0000
  13  -7  -1     184      21                                                         125   -4.61    0.00  1.0000
 -13   7   1     188      20                                                         128   -4.61    0.00  1.0000
 -13   7   1     159      17                                                         104   -4.61    0.00  1.0000
  12  -7  -1     152      26                                                         187    2.58   -0.01  1.0000
 -12   7   1     170      27                                                         207    2.58    0.01  1.0000
 -12   7   1     158      23                                                         194    2.58    0.01  1.0000
  11  -7  -1      54      15                                                          63   -1.13    0.00  1.0000
 -11   7   1      48      14                                                          56   -1.13    0.00  1.0000
 -11   7   1      24      11                                                          30   -1.13    0.00  1.0000
  10  -7  -1    2205      79                                                        2326   -2.44   -0.01  1.0000
 -10   7   1    2187      80                                                        2307   -2.44    0.01  1.0000
 -10   7   1    2154      82                                                        2273   -2.44    0.01  1.0000
   9  -7  -1      33       9                                                           8    5.59   -0.05  1.0000
  -9   7   1       8       8                                                          -7    5.59    0.05  1.0000
   8  -7  -1      81      14                                                         117    3.47    0.00  1.0000
  -8   7   1      53      12                                                          83    3.47    0.00  1.0000
  -8   7   1      90      16                                                         127    3.47    0.00  1.0000
   7  -7  -1      68      11                                                          60    0.95   -0.01  1.0000
  -7   7   1      36       8                                                          30    0.95    0.01  1.0000
  -7   7   1      37       9                                                          31    0.95    0.01  1.0000
   6  -7  -1    6104     199                                                        6832    8.72   -0.01  1.0000
  -6   7   1    6158     205                                                        6890    8.72    0.01  1.0000
  -6   7   1    6268     200                                                        7006    8.72    0.01  1.0000
   5  -7  -1     532      27                                                         566    1.39    0.00  1.0000
  -5   7   1     466      25                                                         498    1.39    0.00  1.0000
  -5   7   1     463      25                                                         494    1.39    0.00  1.0000
   4  -7  -1    7427     246                                                        8299   -9.47    0.02  1.0000
  -4   7   1    8119     246                                                        9029   -9.47   -0.02  1.0000
  -4   7   1    7904     253                                                        8803   -9.47   -0.02  1.0000
   3  -7  -1     109      12                                                          83    2.53    0.00  1.0000
  -3   7   1      84       9                                                          62    2.53    0.00  1.0000
  -3   7   1     109      12                                                          83    2.53    0.00  1.0000
   1  -7  -1     121       9                                                          61   -6.10   -0.01  1.0000
  -1   7   1     140      10                                                          75   -6.10    0.01  1.0000
  -1   7   1     168      11                                                          96   -6.10    0.01  1.0000
   0  -7  -1   17207     440                                                       16280   -6.89    0.03  1.0000
   0   7   1   16835     441                                                       15918   -6.89   -0.03  1.0000
   0   7   1   16613     439                                                       15702   -6.89   -0.03  1.0000
  -1  -7  -1     109      10                                                          69   -4.13    0.01  1.0000
   1   7   1     102       9                                                          63   -4.13   -0.01  1.0000
   1   7   1     109       9                                                          69   -4.13   -0.01  1.0000
  -2  -7  -1     300      24                                                         552   11.90    0.02  1.0000
   2   7   1     298      23                                                         550   11.90   -0.02  1.0000
   2   7   1     327      25                                                         589   11.90   -0.02  1.0000
   3   7   1     142      14                                                         180   -2.87    0.07  1.0000
   3   7   1     139      12                                                         176   -2.87    0.07  1.0000
  -4  -7  -1   12202     309                                                       11315    7.87    0.00  1.0000
   4   7   1   11977     309                                                       11099    7.87    0.00  1.0000
   4   7   1   11837     307                                                       10964    7.87    0.00  1.0000
  -5  -7  -1     374      22                                                         491   -5.43   -0.04  1.0000
   5   7   1     350      22                                                         463   -5.43    0.04  1.0000
   5   7   1     350      21                                                         464   -5.43    0.04  1.0000
  -6  -7  -1    5465     147                                                        5132   -4.41    0.01  1.0000
   6   7   1    5470     145                                                        5137   -4.41   -0.01  1.0000
   6   7   1    5314     146                                                        4985   -4.41   -0.01  1.0000
  -7  -7  -1     141      16                                                         214    5.33    0.01  1.0000
   7   7   1     156      16                                                         233    5.33   -0.01  1.0000
   7   7   1     161      14                                                         239    5.33   -0.01  1.0000
  -8  -7  -1     108      16                                                         172    5.21    0.02  1.0000
   8   7   1     133      14                                                         203    5.21   -0.02  1.0000
   8   7   1     128      14                                                         197    5.21   -0.02  1.0000
  -9  -7  -1     540      22                                                         398    6.31    0.01  1.0000
   9   7   1     565      19                                                         420    6.31   -0.01  1.0000
   9   7   1     559      24                                                         415    6.31   -0.01  1.0000
   9   7   1     526      21                                                         386    6.31   -0.01  1.0000
 -10  -7  -1    3487     109                                                        3562   -1.21   -0.01  1.0000
  10   7   1    3579     112                                                        3655   -1.21    0.01  1.0000
  10   7   1    3569     106                                                        3645   -1.21    0.01  1.0000
 -11  -7  -1     160      21                                                         245   -5.76    0.04  1.0000
  11   7   1     168      17                                                         254   -5.76   -0.04  1.0000
  11   7   1     172      22                                                         260   -5.76   -0.04  1.0000
 -12  -7  -1     612      31                                                         586   -1.00   -0.01  1.0000
  12   7   1     691      32                                                         664   -1.00    0.01  1.0000
  12   7   1     666      27                                                         639   -1.00    0.01  1.0000
  12   7   1     682      27                                                         655   -1.00    0.01  1.0000
 -13  -7  -1       1      10                                                         -10   -1.67   -0.01  1.0000
  13   7   1       8       8                                                          14   -1.67    0.01  1.0000
  13   7   1       4       8                                                           8   -1.67    0.01  1.0000
  13   7   1       4      11                                                           8   -1.67    0.01  1.0000
 -14  -7  -1    1086      44                                                         990   -2.87   -0.01  1.0000
  14   7   1    1232      37                                                        1129   -2.87    0.01  1.0000
  14   7   1    1110      36                                                        1013   -2.87    0.01  1.0000
  15   7   1     133      18                                                         144    0.94   -0.02  1.0000
  15   7   1     120      15                                                         131    0.94   -0.02  1.0000
  14  -8  -1     471      45                                                         504    1.43   -0.02  1.0000
 -14   8   1     525      45                                                         560    1.43    0.02  1.0000
 -14   8   1     469      41                                                         502    1.43    0.02  1.0000
  13  -8  -1       9      16                                                           2    3.19    0.02  1.0000
 -13   8   1       3      15                                                          -3    3.19   -0.02  1.0000
 -13   8   1      23      14                                                          10    3.19   -0.02  1.0000
  12  -8  -1     285      35                                                         269    0.93    0.01  1.0000
 -12   8   1     288      29                                                         272    0.93   -0.01  1.0000
 -12   8   1     352      32                                                         334    0.93   -0.01  1.0000
  11  -8  -1      17      16                                                          32   -3.01    0.00  1.0000
 -11   8   1      18      14                                                          34   -3.01    0.00  1.0000
 -11   8   1       2      13                                                           0   -3.01    0.00  1.0000
  10  -8  -1     360      30                                                         352   -0.42    0.01  1.0000
 -10   8   1     362      29                                                         354   -0.42   -0.01  1.0000
 -10   8   1     338      30                                                         330   -0.42   -0.01  1.0000
   9  -8  -1       4      10                                                           4   -0.15   -0.02  1.0000
  -9   8   1       8      10                                                           8   -0.15    0.02  1.0000
  -9   8   1       0       8                                                          -5   -0.15    0.02  1.0000
   8  -8  -1       0      11                                                          36  -10.52    0.02  1.0000
  -8   8   1       0       9                                                          33  -10.52   -0.02  1.0000
  -8   8   1       2      12                                                          45  -10.52   -0.02  1.0000
   7  -8  -1      94      12                                                          64   -3.30    0.00  1.0000
  -7   8   1     136      14                                                          99   -3.30    0.00  1.0000
  -7   8   1     122      13                                                          87   -3.30    0.00  1.0000
   6  -8  -1     176      16                                                         150   -1.97   -0.04  1.0000
  -6   8   1     153      16                                                         129   -1.97    0.04  1.0000
  -6   8   1     157      17                                                         132   -1.97    0.04  1.0000
   5  -8  -1     606      32                                                         711   -3.93    0.00  1.0000
  -5   8   1     569      32                                                         671   -3.93    0.00  1.0000
  -5   8   1     559      30                                                         660   -3.93    0.00  1.0000
   4  -8  -1     127      17                                                         169   -3.33   -0.04  1.0000
  -4   8   1     117      15                                                         157   -3.33    0.04  1.0000
  -4   8   1     131      17                                                         174   -3.33    0.04  1.0000
   3  -8  -1      48      12                                                          90    4.97   -0.02  1.0000
  -3   8   1      34      11                                                          71    4.97    0.02  1.0000
  -3   8   1      47      12                                                          89    4.97    0.02  1.0000
  -3   8   1      47      13                                                          89    4.97    0.02  1.0000
   2  -8  -1      53       9                                                          51   -0.28    0.02  1.0000
  -2   8   1      55       9                                                          53   -0.28   -0.02  1.0000
  -2   8   1      50       9                                                          48   -0.28   -0.02  1.0000
  -2   8   1      59      11                                                          57   -0.28   -0.02  1.0000
   1  -8  -1     343      24                                                         474    6.28    0.03  1.0000
  -1   8   1     347      24                                                         479    6.28   -0.03  1.0000
  -1   8   1     334      25                                                         464    6.28   -0.03  1.0000
  -1   8   1     351      23                                                         484    6.28   -0.03  1.0000
   0  -8  -1     382      27                                                         586    8.99    0.01  1.0000
   0   8   1     391      29                                                         598    8.99   -0.01  1.0000
   0   8   1     370      26                                                         572    8.99   -0.01  1.0000
  -1  -8  -1    1058      44                                                        1145   -2.52   -0.03  1.0000
   1   8   1    1120      45                                                        1209   -2.52    0.03  1.0000
   1   8   1    1138      42                                                        1228   -2.52    0.03  1.0000
  -2  -8  -1    1448      43                                                        1177    7.20   -0.05  1.0000
   2   8   1    1387      41                                                        1122    7.20    0.05  1.0000
   2   8   1    1509      44                                                        1232    7.20    0.05  1.0000
   3   8   1      88      15                                                         132   -4.09   -0.02  1.0000
   3   8   1      83      12                                                         126   -4.09   -0.02  1.0000
   4   8   1     204      28                                                         586   19.11    0.01  1.0000
   4   8   1     208      25                                                         593   19.11    0.01  1.0000
  -5  -8  -1     146      14                                                         138   -0.65   -0.02  1.0000
   5   8   1     145      13                                                         137   -0.65    0.02  1.0000
   5   8   1     124      15                                                         117   -0.65    0.02  1.0000
  -6  -8  -1     358      21                                                         345    0.65   -0.04  1.0000
   6   8   1     347      18                                                         335    0.65    0.04  1.0000
   6   8   1     350      20                                                         338    0.65    0.04  1.0000
  -7  -8  -1      94      15                                                         106   -1.20    0.00  1.0000
   7   8   1     121      12                                                         135   -1.20    0.00  1.0000
   7   8   1     113      14                                                         127   -1.20    0.00  1.0000
  -8  -8  -1     426      22                                                         366   -2.89    0.03  1.0000
   8   8   1     371      20                                                         315   -2.89   -0.03  1.0000
   8   8   1     434      19                                                         374   -2.89   -0.03  1.0000
  -9  -8  -1      59       9                                                          15    7.37   -0.05  1.0000
   9   8   1      61       8                                                          16    7.37    0.05  1.0000
   9   8   1      49       8                                                          10    7.37    0.05  1.0000
   9   8   1      76       7                                                          24    7.37    0.05  1.0000
 -10  -8  -1    1202      48                                                        1269   -1.83    0.01  1.0000
  10   8   1    1238      44                                                        1306   -1.83   -0.01  1.0000
  10   8   1    1275      50                                                        1344   -1.83   -0.01  1.0000
 -11  -8  -1     215      23                                                         257    2.64    0.01  1.0000
  11   8   1     239      24                                                         283    2.64   -0.01  1.0000
  11   8   1     199      20                                                         240    2.64   -0.01  1.0000
  11   8   1     232      18                                                         276    2.64   -0.01  1.0000
 -12  -8  -1     826      37                                                         799   -0.90   -0.01  1.0000
  12   8   1     828      37                                                         801   -0.90    0.01  1.0000
  12   8   1     857      32                                                         830   -0.90    0.01  1.0000
  12   8   1     771      30                                                         745   -0.90    0.01  1.0000
 -13  -8  -1      21      11                                                           5   -4.55   -0.01  1.0000
  13   8   1      44       8                                                          18   -4.55    0.01  1.0000
  13   8   1      44       8                                                          18   -4.55    0.01  1.0000
  14   8   1     526      33                                                         492    1.47    0.03  1.0000
  14   8   1     547      23                                                         512    1.47    0.03  1.0000
 -13   9   1     127      23                                                         109    1.61   -0.01  1.0000
 -13   9   1     143      21                                                         124    1.61   -0.01  1.0000
 -12   9   1     404      35                                                         407    0.15   -0.01  1.0000
 -12   9   1     405      37                                                         408    0.15   -0.01  1.0000
  11  -9  -1      81      19                                                          79   -0.23   -0.02  1.0000
[truncated: 5,028,759 more chars]
