# Supplementary material for: Hydrolytic cleavage of both CS2 carbon–sulfur bonds by multinuclear Pd(II) complexes at room temperature
Source: Springer Nature journal article supplement (doi:10.1038/nchem.2637), 2016-10-24
Supplement: 41557_2017_BFnchem2637_MOESM18_ESM.mol [file 41557_2017_BFnchem2637_MOESM18_ESM.mol]

nchem.2637-comp3a.mol
  ChemDraw10041614032D

 49 45  0  0  0  0  0  0  0  0999 V2000
   -0.1722   -0.5190    0.0000 Pd  0  2  0  0  0  0  0  0  0  0  0  0
    1.6140   -3.8068    0.0000 C   0  0  0  0  0  0  0  0  0  0  0  0
    0.7890   -3.8068    0.0000 C   0  0  0  0  0  0  0  0  0  0  0  0
    0.3765   -3.0923    0.0000 C   0  0  0  0  0  0  0  0  0  0  0  0
    0.7890   -2.3778    0.0000 N   0  0  0  0  0  0  0  0  0  0  0  0
    1.6140   -2.3778    0.0000 C   0  0  0  0  0  0  0  0  0  0  0  0
    2.0265   -3.0923    0.0000 C   0  0  0  0  0  0  0  0  0  0  0  0
   -0.4485   -3.0923    0.0000 C   0  0  0  0  0  0  0  0  0  0  0  0
   -0.8610   -3.8068    0.0000 C   0  0  0  0  0  0  0  0  0  0  0  0
   -1.6860   -3.8068    0.0000 C   0  0  0  0  0  0  0  0  0  0  0  0
   -2.0985   -3.0923    0.0000 C   0  0  0  0  0  0  0  0  0  0  0  0
   -1.6860   -2.3778    0.0000 C   0  0  0  0  0  0  0  0  0  0  0  0
   -0.8610   -2.3778    0.0000 N   0  0  0  0  0  0  0  0  0  0  0  0
   -4.4815    0.9489    0.0000 C   0  0  0  0  0  0  0  0  0  0  0  0
   -4.0690    1.6634    0.0000 C   0  0  0  0  0  0  0  0  0  0  0  0
   -3.2440    1.6634    0.0000 C   0  0  0  0  0  0  0  0  0  0  0  0
   -2.8315    0.9489    0.0000 N   0  0  0  0  0  0  0  0  0  0  0  0
   -3.2440    0.2344    0.0000 C   0  0  0  0  0  0  0  0  0  0  0  0
   -4.0690    0.2344    0.0000 C   0  0  0  0  0  0  0  0  0  0  0  0
   -2.8315    2.3778    0.0000 C   0  0  0  0  0  0  0  0  0  0  0  0
   -3.2440    3.0923    0.0000 C   0  0  0  0  0  0  0  0  0  0  0  0
   -2.8315    3.8068    0.0000 C   0  0  0  0  0  0  0  0  0  0  0  0
   -2.0065    3.8068    0.0000 C   0  0  0  0  0  0  0  0  0  0  0  0
   -1.5940    3.0923    0.0000 C   0  0  0  0  0  0  0  0  0  0  0  0
   -2.0065    2.3778    0.0000 N   0  0  0  0  0  0  0  0  0  0  0  0
    2.5351    3.7575    0.0000 C   0  0  0  0  0  0  0  0  0  0  0  0
    2.9476    3.0430    0.0000 C   0  0  0  0  0  0  0  0  0  0  0  0
    2.5351    2.3285    0.0000 C   0  0  0  0  0  0  0  0  0  0  0  0
    1.7101    2.3285    0.0000 N   0  0  0  0  0  0  0  0  0  0  0  0
    1.2976    3.0430    0.0000 C   0  0  0  0  0  0  0  0  0  0  0  0
    1.7101    3.7575    0.0000 C   0  0  0  0  0  0  0  0  0  0  0  0
    2.9476    1.6141    0.0000 C   0  0  0  0  0  0  0  0  0  0  0  0
    3.7726    1.6141    0.0000 C   0  0  0  0  0  0  0  0  0  0  0  0
    4.1851    0.8996    0.0000 C   0  0  0  0  0  0  0  0  0  0  0  0
    3.7726    0.1851    0.0000 C   0  0  0  0  0  0  0  0  0  0  0  0
    2.9476    0.1851    0.0000 C   0  0  0  0  0  0  0  0  0  0  0  0
    2.5351    0.8996    0.0000 N   0  0  0  0  0  0  0  0  0  0  0  0
   -1.0000    0.9148    0.0000 Pd  0  2  0  0  0  0  0  0  0  0  0  0
    0.6556    0.9148    0.0000 Pd  0  2  0  0  0  0  0  0  0  0  0  0
   -2.4716   -1.0156    0.0000 S   0  3  0  0  0  0  0  0  0  0  0  0
    2.1356   -1.0832    0.0000 S   0  3  0  0  0  0  0  0  0  0  0  0
   -4.3281   -2.2168    0.0000 N   0  3  0  0  0  0  0  0  0  0  0  0
   -3.6112   -1.8029    0.0000 O   0  5  0  0  0  0  0  0  0  0  0  0
   -4.3281   -3.0446    0.0000 O   0  0  0  0  0  0  0  0  0  0  0  0
   -5.0450   -1.8029    0.0000 O   0  5  0  0  0  0  0  0  0  0  0  0
    4.3281   -2.2478    0.0000 N   0  3  0  0  0  0  0  0  0  0  0  0
    5.0450   -1.8339    0.0000 O   0  5  0  0  0  0  0  0  0  0  0  0
    4.3281   -3.0755    0.0000 O   0  0  0  0  0  0  0  0  0  0  0  0
    3.6112   -1.8339    0.0000 O   0  5  0  0  0  0  0  0  0  0  0  0
  2  3  2  0      
  3  4  1  0      
  4  5  2  0      
  5  6  1  0      
  6  7  2  0      
  7  2  1  0      
  4  8  1  0      
  8  9  2  0      
  9 10  1  0      
 10 11  2  0      
 11 12  1  0      
 12 13  2  0      
 13  8  1  0      
 14 15  2  0      
 15 16  1  0      
 16 17  2  0      
 17 18  1  0      
 18 19  2  0      
 19 14  1  0      
 16 20  1  0      
 20 21  2  0      
 21 22  1  0      
 22 23  2  0      
 23 24  1  0      
 24 25  2  0      
 25 20  1  0      
 26 27  2  0      
 27 28  1  0      
 28 29  2  0      
 29 30  1  0      
 30 31  2  0      
 31 26  1  0      
 28 32  1  0      
 32 33  2  0      
 33 34  1  0      
 34 35  2  0      
 35 36  1  0      
 36 37  2  0      
 37 32  1  0      
 42 43  1  0      
 42 44  2  0      
 42 45  1  0      
 46 47  1  0      
 46 48  2  0      
 46 49  1  0      
M  CHG  8   1   2  38   2  39   2  40   1  41   1  42   1  43  -1  45  -1
M  CHG  3  46   1  47  -1  49  -1
M  END
